# Supplementary material for: Generating cysteine-trypsin cleavage sites with 2-chloroacetamidine capping
Source: Royal Society of Chemistry journal article supplement (doi:10.1039/d4cc01583e), 2024-01-01
Supplement: d4cc01583e5.xlsx [file d4cc01583e5.xlsx]

## Sheet: Table of Contents
	Sheet Name	Description
Figure 4
	cyscap_variants_table	Data file containing misense variants in both IA and CAM mods
	cyscap_variants_table_CAMonly	Data file containing misense variants for only CAM mods

## Sheet: cyscap_variants_table
Peptide.Sequence	Prev.AA	Cleavage Site	Prev=C	Cleav=C	Next.AA	Peptide.Length	Protein.Start	Protein.End	Charges	Spectral.Count	Intensity	Assigned.Modifications	Protein	Entry.Name	Replicate	CysPositionInProtein	Variant_Information	Variant	Gene_VariantPosition	Cell_Line	Reagent	RARE	COMMON	RNA	EXOME
AAAAAAAAAAATSGSGGCPPAPGLESGAGAVGCGYPR	R	R	FALSE	FALSE	T	37	10	46	4	1	0	18C(56.0374), 33C(56.0374)	Q5VZB9	Q5VZB9	1A	74,89	sp|Q5VZB9|ENSG00000176399.3|DMRTA1|ENST00000325870.2|89715-HCT-15_RARE_EXOME-V84A|84a|	DMRTA1_p.V84A	84	HCT-15	CAM	TRUE	FALSE	FALSE	TRUE
AAAAAAAAAPAAAATAATTAATTAATAAQ	K	Q	FALSE	FALSE	-	29	6	34	2	7	0	NA	P37108	P37108	1A		sp|P37108|ENSG00000140319.10|SRP14|ENST00000267884.10|142380-HCT-15_SNP_RNA-P124A-and-142380-HCT-15_SNP_EXOME-P124A|124a|	SRP14_p.P124A	124	HCT-15	CAM	FALSE	TRUE	TRUE	TRUE
AAAAAAAAPAATSGSGGCPPAPGLESGAGA	R	A	FALSE	FALSE	V	30	1	30	3	1	0	NA	Q5VZB9	Q5VZB9	1A	74	sp|Q5VZB9|ENSG00000176399.3|DMRTA1|ENST00000325870.2|89715-HCT-15_SNP_EXOME-A65P,89715-HCT-15_RARE_EXOME-V84A|65p84a|	DMRTA1_p.A65P,V84A	65,84	HCT-15	CAM	TRUE	TRUE	FALSE	TRUE
AAAEDVNVTLEDQQK	K	K	FALSE	FALSE	L	15	8	22	2	3	0	NA	Q9NQP4	Q9NQP4	1A		sp|Q9NQP4|ENSG00000101132.9|PFDN4|ENST00000371419.6|186833-HCT-15_RARE_RNA-F17L-and-186833-HCT-15_RARE_EXOME-F17L|17l|	PFDN4_p.F17L	17	HCT-15	CAM	TRUE	FALSE	TRUE	TRUE
AAAVADEAVAR	M	R	FALSE	FALSE	D	11	1	11	2	1	0	N-term(42.0106)	Q9NVX2	Q9NVX2	1A		sp|Q9NVX2-1|ENSG00000073536.17|NLE1|ENST00000442241.8|164319-HCT-15_SNP_EXOME-P6A|6a|	NLE1_p.P6A	6	HCT-15	CAM	FALSE	TRUE	FALSE	TRUE
AAAVRPDLAQLMNSSGSHK	M	K	FALSE	FALSE	D	19	2	20	3	3	0	12M(15.9949), N-term(42.0106)	Q9BT78	Q9BT78	1A		sp|Q9BT78-1|ENSG00000138663.8|COPS4|ENST00000264389.6|47267-HCT-15_RARE_RNA-Q7P-and-47267-HCT-15_RARE_EXOME-Q7P|7p|	COPS4_p.Q7P	7	HCT-15	CAM	TRUE	FALSE	TRUE	TRUE
AAFALGGLGSGFTSNR	R	R	FALSE	FALSE	E	16	11	26	2	1	0	NA	P27708	P27708	1A		sp|P27708|ENSG00000084774.13|CAD|ENST00000264705.8|18701-HCT-15_SNP_RNA-A568T-and-18701-HCT-15_SNP_EXOME-A568T|568t|	CAD_p.A568T	568	HCT-15	CAM	FALSE	TRUE	TRUE	TRUE
AAFALGGLGSGFTSNREELSALVAPAFAHTSQVLVDK	R	K	FALSE	FALSE	S	37	11	47	4	1	0	NA	P27708	P27708	1A		sp|P27708|ENSG00000084774.13|CAD|ENST00000264705.8|18701-HCT-15_SNP_RNA-A568T-and-18701-HCT-15_SNP_EXOME-A568T|568t|	CAD_p.A568T	568	HCT-15	CAM	FALSE	TRUE	TRUE	TRUE
AALAGHPQAHFLDADPGFVHSDGTISHHDMYDYLHLSR	R	R	FALSE	FALSE	L	38	10	47	6	2	0	30M(15.9949)	Q15102	Q15102	1A		sp|Q15102|ENSG00000079462.7|PAFAH1B3|ENST00000262890.7|182746-HCT-15_RARE_RNA-R168Q-and-182746-HCT-15_RARE_EXOME-R168Q|168q|	PAFAH1B3_p.R168Q	168	HCT-15	CAM	TRUE	FALSE	TRUE	TRUE
AALVDLEPC	R	C	FALSE	TRUE	T	9	7	15	2	5	0	9C(56.0374)	Q9BUF5	Q9BUF5	1A	71	sp|Q9BUF5|ENSG00000176014.12|TUBB6|ENST00000317702.9|168837-HCT-15_RARE_RNA-G71C-and-168837-HCT-15_RARE_EXOME-G71C|71c|	TUBB6_p.G71C	71	HCT-15	CAM	TRUE	FALSE	TRUE	TRUE
AAPTFMISPETITGTGK	S	K	FALSE	FALSE	K	17	1	17	2	1	0	NA	P27816	P27816	1A		sp|P27816-1|ENSG00000047849.21|MAP4|ENST00000360240.10|40535-HCT-15_SNP_EXOME-V628I|628i|	MAP4_p.V628I	628	HCT-15	CAM	FALSE	TRUE	FALSE	TRUE
AAQLLDVR	R	R	FALSE	FALSE	L	8	8	15	2	1	0	NA	Q9NSC5	Q9NSC5	1A		sp|Q9NSC5-1|ENSG00000051128.18|HOMER3|ENST00000539827.5|181226-HCT-15_RARE_RNA-S342R-and-181226-HCT-15_RARE_EXOME-S342R|342r|	HOMER3_p.S342R	342	HCT-15	CAM	TRUE	FALSE	TRUE	TRUE
AAVPAPEEEMDECEQALAAEPK	K	K	FALSE	FALSE	A	22	8	29	2, 3	16	0	10M(15.9949), 13C(56.0374)	P26641	P26641	1A	266	sp|P26641-1|ENSG00000254772.9|EEF1G|ENST00000329251.4|112031-HCT-15_RARE_RNA-A256V-and-112031-HCT-15_RARE_EXOME-A256V|256v|	EEF1G_p.A256V	256	HCT-15	CAM	TRUE	FALSE	TRUE	TRUE
ADASSTSSFQQAFASSC	R	C	FALSE	TRUE	T	17	8	24	2	1	0	17C(56.0374)	Q68CZ2	Q68CZ2	1A	928	sp|Q68CZ2-1|ENSG00000136205.16|TNS3|ENST00000311160.13|78095-HCT-15_SNP_RNA-P918S-and-78095-HCT-15_SNP_EXOME-P918S|918s|	TNS3_p.P918S	918	HCT-15	CAM	FALSE	TRUE	TRUE	TRUE
AEAMDVDTPSGTNSGAGK	M	K	FALSE	FALSE	K	18	2	19	2	1	0	N-term(42.0106)	P62877	P62877	1A		sp|P62877|ENSG00000100387.8|RBX1|ENST00000216225.8|193858-HCT-15_RARE_RNA-A3E-and-193858-HCT-15_RARE_EXOME-A3E|3e|	RBX1_p.A3E	3	HCT-15	CAM	TRUE	FALSE	TRUE	TRUE
AEAMDVDTPSGTNSGAGKK	M	K	FALSE	FALSE	R	19	2	20	2	3	0	4M(15.9949), N-term(42.0106)	P62877	P62877	1A		sp|P62877|ENSG00000100387.8|RBX1|ENST00000216225.8|193858-HCT-15_RARE_RNA-A3E-and-193858-HCT-15_RARE_EXOME-A3E|3e|	RBX1_p.A3E	3	HCT-15	CAM	TRUE	FALSE	TRUE	TRUE
AELQTESLTPVPNSGSSVLGSLFK	K	K	FALSE	FALSE	Q	24	1	24	2	1	0	NA	Q6WKZ4	Q6WKZ4	1A		sp|Q6WKZ4-4|ENSG00000156675.15|RAB11FIP1|ENST00000330843.8|86167-HCT-15_SNP_RNA-A651V-and-86167-HCT-15_SNP_EXOME-A651V|651v|	RAB11FIP1_p.A651V	651	HCT-15	CAM	FALSE	TRUE	TRUE	TRUE
AENTEGDLNSNLPHAPYHTGDPQLDTAIGQWLR	M	R	FALSE	FALSE	W	33	2	34	3	4	0	N-term(42.0106)	Q6PCE3	Q6PCE3	1A		sp|Q6PCE3|ENSG00000165434.7|PGM2L1|ENST00000298198.4|113409-HCT-15_SNP_EXOME-L14P|14p|	PGM2L1_p.L14P	14	HCT-15	CAM	FALSE	TRUE	FALSE	TRUE
AGALMMPLVDQLENR	R	R	FALSE	FALSE	L	15	1	15	2	1	0	NA	Q9H583	Q9H583	1A		sp|Q9H583|ENSG00000119285.10|HEATR1|ENST00000366582.7|17722-HCT-15_SNP_RNA-E2017G-and-17722-HCT-15_SNP_EXOME-E2017G|2017g|	HEATR1_p.E2017G	2017	HCT-15	CAM	FALSE	TRUE	TRUE	TRUE
AGEGSYALDSESCMEK	K	K	FALSE	FALSE	L	16	13	28	2, 3	4	0	13C(56.0374)	O00541	O00541	1A	272	sp|O00541-1|ENSG00000100029.17|PES1|ENST00000354694.11|195397-HCT-15_RARE_RNA-T264S-and-195397-HCT-15_RARE_EXOME-T264S|264s|	PES1_p.T264S	264	HCT-15	CAM	TRUE	FALSE	TRUE	TRUE
AGHQSAAASNLSGLSLQEAQQILNVSK	R	K	FALSE	FALSE	L	27	5	31	3	4	0	NA	Q9Y3D7	Q9Y3D7	1A		sp|Q9Y3D7|ENSG00000217930.7|PAM16|ENST00000318059.7|151848-HCT-15_SNP_RNA-R44Q-and-151848-HCT-15_SNP_EXOME-R44Q|44q|	PAM16_p.R44Q	44	HCT-15	CAM	FALSE	TRUE	TRUE	TRUE
AGLFQHPLQSEYSSITTTHTSATEPFLVDGPTLGAQHLEAGGSLTR	R	R	FALSE	FALSE	H	46	1	46	5	1	0	NA	P16144	P16144	1A		sp|P16144-1|ENSG00000132470.13|ITGB4|ENST00000200181.7|160924-HCT-15_SNP_EXOME-L1779P|1779p|	ITGB4_p.L1779P	1779	HCT-15	CAM	FALSE	TRUE	FALSE	TRUE
AGVAAPATQVVQVTLQSVQR	K	R	FALSE	FALSE	R	20	5	24	2	1	0	NA	Q15149	Q15149	1A		sp|Q15149-1|ENSG00000178209.14|PLEC|ENST00000322810.8|89058-HCT-15_SNP_RNA-A641V-and-89058-HCT-15_SNP_EXOME-A641V|641v|	PLEC_p.A641V	641	HCT-15	CAM	FALSE	TRUE	TRUE	TRUE
AHAFVVQQK	K	K	FALSE	FALSE	E	9	1	9	2	5	0	NA	Q15149	Q15149	1A		sp|Q15149-1|ENSG00000178209.14|PLEC|ENST00000322810.8|89058-HCT-15_SNP_RNA-A2194V-and-89058-HCT-15_SNP_EXOME-A2194V|2194v|	PLEC_p.A2194V	2194	HCT-15	CAM	FALSE	TRUE	TRUE	TRUE
AHGAPINSLLLVDENVLATGDDTGGIR	K	R	FALSE	FALSE	L	27	1	27	3	3	0	NA	Q9H6Y2	Q9H6Y2	1A		sp|Q9H6Y2-1|ENSG00000120314.18|WDR55|ENST00000358337.9|56558-HCT-15_SNP_RNA-C151R-and-56558-HCT-15_SNP_EXOME-C151R|151r|	WDR55_p.C151R	151	HCT-15	CAM	FALSE	TRUE	TRUE	TRUE
AIILDLSCNK	K	K	FALSE	FALSE	L	10	10	19	2	2	0	8C(56.0374)	Q96AG4	Q96AG4	1A	48	sp|Q96AG4|ENSG00000108829.9|LRRC59|ENST00000225972.7|166134-HCT-15_RARE_RNA-T42I-and-166134-HCT-15_RARE_EXOME-T42I|42i|	LRRC59_p.T42I	42	HCT-15	CAM	TRUE	FALSE	TRUE	TRUE
AILCLDLAGR	H	R	FALSE	FALSE	D	10	58	67	2	1	0	4C(56.0374)	P60709	P60709	1A	177	sp|P60709|ENSG00000075624.14|ACTB|ENST00000646664.1|76882-HCT-15_RARE_RNA-R177C-and-76882-HCT-15_RARE_EXOME-R177C|177c|	ACTB_p.R177C	177	HCT-15	CAM	TRUE	FALSE	TRUE	TRUE
AIVSQQFVEMTR	K	R	FALSE	FALSE	T	12	6	17	2	2	0	NA	P48444	P48444	1A		sp|P48444-1|ENSG00000095139.13|ARCN1|ENST00000264028.4|108466-HCT-15_SNP_RNA-R19Q-and-108466-HCT-15_SNP_EXOME-R19Q|19q|	ARCN1_p.R19Q	19	HCT-15	CAM	FALSE	TRUE	TRUE	TRUE
ALPHAILCLDLAGR	Y	R	FALSE	FALSE	D	14	54	67	3	1	0	8C(56.0374)	P60709	P60709	1A	177	sp|P60709|ENSG00000075624.14|ACTB|ENST00000646664.1|76882-HCT-15_RARE_RNA-R177C-and-76882-HCT-15_RARE_EXOME-R177C|177c|	ACTB_p.R177C	177	HCT-15	CAM	TRUE	FALSE	TRUE	TRUE
ALREWEEAER	R	R	FALSE	FALSE	A	10	1	10	3	1	0	NA	Q14244	Q14244	1A		sp|Q14244-1|ENSG00000135525.18|MAP7|ENST00000354570.7|70864-HCT-15_SNP_RNA-R558W-and-70864-HCT-15_SNP_EXOME-R558W|558w|	MAP7_p.R558W	558	HCT-15	CAM	FALSE	TRUE	TRUE	TRUE
ALTAQLPVLPR	R	R	FALSE	FALSE	S	11	21	31	2	2	0	NA	Q96GK7	Q96GK7	1A		sp|Q96GK7|ENSG00000115042.9|FAHD2A|ENST00000447036.5|20778-HCT-15_RARE_EXOME-A85T|85t|	FAHD2A_p.A85T	85	HCT-15	CAM	TRUE	FALSE	FALSE	TRUE
ANFSPFGNSQGPSR	K	R	FALSE	FALSE	V	14	1	14	2	1	0	NA	Q9H2M9	Q9H2M9	1A		sp|Q9H2M9-1|ENSG00000118873.15|RAB3GAP2|ENST00000358951.6|17140-HCT-15_SNP_RNA-D448N-and-17140-HCT-15_SNP_EXOME-D448N|448n|	RAB3GAP2_p.D448N	448	HCT-15	CAM	FALSE	TRUE	TRUE	TRUE
ANNAGGGLPAAGPGDR	K	R	FALSE	FALSE	C	16	1	16	2	1	0	NA	Q9UPN4	Q9UPN4	1A		sp|Q9UPN4-1|ENSG00000141577.13|CEP131|ENST00000269392.8|167950-HCT-15_SNP_EXOME-T397A|397a|	CEP131_p.T397A	397	HCT-15	CAM	FALSE	TRUE	FALSE	TRUE
APHNPAPPMSTVIHIR	G	R	FALSE	FALSE	S	16	1	16	4	2	0	9M(15.9949)	Q01629	Q01629	1A		sp|Q01629|ENSG00000185201.16|IFITM2|ENST00000616316.1|102873-HCT-15_SNP_RNA-V33A-and-102873-HCT-15_SNP_EXOME-V33A|33a|	IFITM2_p.V33A	33	HCT-15	CAM	FALSE	TRUE	TRUE	TRUE
APKPEDIDEEYDDVPDLVENFDEASK	K	K	FALSE	FALSE	N	26	3	28	3	3	0	NA	Q96K17	Q96K17	1A		sp|Q96K17-1|ENSG00000134717.17|BTF3L4|ENST00000313334.12|3146-HCT-15_RARE_RNA-D139Y-and-3146-HCT-15_RARE_EXOME-D139Y|139y|	BTF3L4_p.D139Y	139	HCT-15	CAM	TRUE	FALSE	TRUE	TRUE
APPMPGPVPEAAQPFLFTPR	K	R	FALSE	FALSE	G	20	1	20	2	1	0	NA	Q7Z406	Q7Z406	1A		sp|Q7Z406-1|ENSG00000105357.16|MYH14|ENST00000376970.6|177517-HCT-15_RARE_RNA-R16M-and-177517-HCT-15_RARE_EXOME-R16M|16m|	MYH14_p.R16M	16	HCT-15	CAM	TRUE	FALSE	TRUE	TRUE
APPWVPAMGFTLAPSMGC	M	C	FALSE	TRUE	F	18	1	18	2	1	0	18C(56.0374)	P30536	P30536	1A	19	sp|P30536-1|ENSG00000100300.17|TSPO|ENST00000337554.7|194007-HCT-15_RARE_RNA-L17M-and-194007-HCT-15_RARE_EXOME-L17M|17m|	TSPO_p.L17M	17	HCT-15	CAM	TRUE	FALSE	TRUE	TRUE
APPWVPAMGFTLAPSMGCFVGSR	M	R	FALSE	FALSE	F	23	1	23	3	1	0	18C(56.0374)	P30536	P30536	1A	19	sp|P30536-1|ENSG00000100300.17|TSPO|ENST00000337554.7|194007-HCT-15_RARE_RNA-L17M-and-194007-HCT-15_RARE_EXOME-L17M|17m|	TSPO_p.L17M	17	HCT-15	CAM	TRUE	FALSE	TRUE	TRUE
APSPLYSVEFSEEPFGVIVHR	R	R	FALSE	FALSE	Q	21	17	37	3	7	0	NA	P10253	P10253	1A		sp|P10253|ENSG00000171298.12|GAA|ENST00000390015.7|161319-HCT-15_SNP_RNA-R223H-and-161319-HCT-15_SNP_EXOME-R223H|223h|	GAA_p.R223H	223	HCT-15	CAM	FALSE	TRUE	TRUE	TRUE
AQEALLQLSQALSLMETVK	R	K	FALSE	FALSE	Q	19	1	19	2	2	0	15M(15.9949)	O60664	O60664	1A		sp|O60664-1|ENSG00000105355.8|PLIN3|ENST00000221957.8|179418-HCT-15_SNP_RNA-V275A-and-179418-HCT-15_SNP_EXOME-V275A|275a|	PLIN3_p.V275A	275	HCT-15	CAM	FALSE	TRUE	TRUE	TRUE
ASEDPLLNLVSPLGCEVDVEEGDVGR	R	R	FALSE	FALSE	D	26	18	43	3	1	0	15C(56.0374)	Q8NDH3	Q8NDH3	1A	504	sp|Q8NDH3-1|ENSG00000215440.11|NPEPL1|ENST00000356091.10|186970-HCT-15_RARE_RNA-L513V-and-186970-HCT-15_RARE_EXOME-L513V|513v|	NPEPL1_p.L513V	513	HCT-15	CAM	TRUE	FALSE	TRUE	TRUE
ASLGSLEGEAEAETSSPK	K	K	FALSE	FALSE	G	18	1	18	2	12	0	NA	Q09666	Q09666	1A		sp|Q09666-1|ENSG00000124942.13|AHNAK|ENST00000378024.8|112027-HCT-15_RARE_RNA-A5761T-and-112027-HCT-15_RARE_EXOME-A5761T|5761t|	AHNAK_p.A5761T	5761	HCT-15	CAM	TRUE	FALSE	TRUE	TRUE
ASPLLAIGQTLAR	R	R	FALSE	FALSE	Q	13	14	26	2	1	0	NA	Q9NSI2	Q9NSI2	1A		sp|Q9NSI2-1|ENSG00000160256.12|FAM207A|ENST00000291634.10|190628-HCT-15_SNP_RNA-V212L-and-190628-HCT-15_SNP_EXOME-V212L|212l|	FAM207A_p.V212L	212	HCT-15	CAM	FALSE	TRUE	TRUE	TRUE
ASSEGTIPQAQR	K	R	FALSE	FALSE	E	12	1	12	2	1	0	NA	Q9BVJ6	Q9BVJ6	1A		sp|Q9BVJ6-1|ENSG00000156697.12|UTP14A|ENST00000394422.7|199015-HCT-15_SNP_EXOME-V487A|487a|	UTP14A_p.V487A	487	HCT-15	CAM	FALSE	TRUE	FALSE	TRUE
ASSSILINESEPITNIQIR	K	R	FALSE	FALSE	L	19	1	19	2	2	0	NA	Q9UNZ2	Q9UNZ2	1A		sp|Q9UNZ2-1|ENSG00000088833.17|NSFL1C|ENST00000216879.8|187508-HCT-15_SNP_RNA-D290N-and-187508-HCT-15_SNP_EXOME-D290N,187508-HCT-15_RARE_RNA-T295I-and-187508-HCT-15_RARE_EXOME-T295I|290n295i|	NSFL1C_p.D290N,T295I	290295	HCT-15	CAM	TRUE	TRUE	TRUE	TRUE
AVEVATVVIQPTVLR	K	R	FALSE	FALSE	A	15	22	36	2	6	0	NA	Q9P2B2	Q9P2B2	1A		sp|Q9P2B2|ENSG00000134247.9|PTGFRN|ENST00000393203.2|5014-HCT-15_SNP_EXOME-S277T|277t|	PTGFRN_p.S277T	277	HCT-15	CAM	FALSE	TRUE	FALSE	TRUE
AVGRLEAVSHTSDMHSGYADSPSK	R	K	FALSE	FALSE	A	24	1	24	5	1	0	NA	Q01518	Q01518	1A		sp|Q01518-1|ENSG00000131236.16|CAP1|ENST00000372797.7|2315-HCT-15_RARE_RNA-R29S-and-2315-HCT-15_RARE_EXOME-R29S|29s|	CAP1_p.R29S	29	HCT-15	CAM	TRUE	FALSE	TRUE	TRUE
AYNYIAQEVDDYHAFQTLTHIYNK	R	K	FALSE	FALSE	V	24	28	51	4	2	0	NA	Q9NYU2	Q9NYU2	1A		sp|Q9NYU2-1|ENSG00000136731.12|UGGT1|ENST00000259253.10|21872-HCT-15_SNP_RNA-V558I-and-21872-HCT-15_SNP_EXOME-V558I|558i|	UGGT1_p.V558I	558	HCT-15	CAM	FALSE	TRUE	TRUE	TRUE
CFVALDFEQEMAIVASSSSLEK	L	K	FALSE	FALSE	S	22	1	22	2	1	0	11M(15.9949), 1C(56.0374)	P0CG38	P0CG38	1A	917	sp|P0CG38|ENSG00000196834.11|POTEI|ENST00000451531.6|29623-HCT-15_SNP_EXOME-A930V,29623-HCT-15_SNP_EXOME-M929I,29623-HCT-15_SNP_EXOME-Y918F|918f929i930v|	POTEI_p.A930V,M929I,Y918F	930929918	HCT-15	CAM	FALSE	TRUE	FALSE	TRUE
DATGLECKPQPLHK	K	K	FALSE	FALSE	T	14	1	14	3	4	0	7C(56.0374)	Q9BXP5	Q9BXP5	1A	412	sp|Q9BXP5-1|ENSG00000087087.19|SRRT|ENST00000611405.4|74711-HCT-15_RARE_RNA-R415Q-and-74711-HCT-15_RARE_EXOME-R415Q,74711-HCT-15_RARE_RNA-A408T-and-74711-HCT-15_RARE_EXOME-A408T|408t415q|	SRRT_p.R415Q,A408T	415408	HCT-15	CAM	TRUE	FALSE	TRUE	TRUE
DCFIIYQGHHGDVGAPISDVILPGAAYTEK	K	K	FALSE	FALSE	S	30	1	30	4	1	0	2C(56.0374)	P28331	P28331	1A	564	sp|P28331-1|ENSG00000023228.13|NDUFS1|ENST00000449699.5|31574-HCT-15_RARE_RNA-A580S-and-31574-HCT-15_RARE_EXOME-A580S|580s|	NDUFS1_p.A580S	580	HCT-15	CAM	TRUE	FALSE	TRUE	TRUE
DEPLHALYDNVEK	R	K	FALSE	FALSE	L	13	8	20	2, 3	9	0	NA	P08243	P08243	1A		sp|P08243-1|ENSG00000070669.16|ASNS|ENST00000175506.8|79376-HCT-15_SNP_RNA-V210E-and-79376-HCT-15_SNP_EXOME-V210E|210e|	ASNS_p.V210E	210	HCT-15	CAM	FALSE	TRUE	TRUE	TRUE
DEVVSPLPSALQGPSC	R	C	FALSE	TRUE	S	16	1	16	2	2	0	16C(56.0374)	Q7L2J0	Q7L2J0	1A	341	sp|Q7L2J0-1|ENSG00000146834.13|MEPCE|ENST00000310512.3|74616-HCT-15_RARE_RNA-G341C-and-74616-HCT-15_RARE_EXOME-G341C|341c|	MEPCE_p.G341C	341	HCT-15	CAM	TRUE	FALSE	TRUE	TRUE
DFYVVEPLAFEGTPEQK	K	K	FALSE	FALSE	A	17	11	27	2	1	0	NA	P06865	P06865	1A		sp|P06865-1|ENSG00000213614.9|HEXA|ENST00000268097.9|144124-HCT-15_SNP_RNA-I436V-and-144124-HCT-15_SNP_EXOME-I436V|436v|	HEXA_p.I436V	436	HCT-15	CAM	FALSE	TRUE	TRUE	TRUE
DGQELEPQVGEQLLQLWER	R	R	FALSE	FALSE	L	19	9	27	2	2	0	NA	Q9H6S0	Q9H6S0	1A		sp|Q9H6S0|ENSG00000047188.15|YTHDC2|ENST00000161863.8|55633-HCT-15_SNP_RNA-L1409Q-and-55633-HCT-15_SNP_EXOME-L1409Q|1409q|	YTHDC2_p.L1409Q	1409	HCT-15	CAM	FALSE	TRUE	TRUE	TRUE
DLEDLFFK	K	K	FALSE	FALSE	Y	8	5	12	2	2	0	NA	Q13242	Q13242	1A		sp|Q13242|ENSG00000111786.8|SRSF9|ENST00000229390.7|126450-HCT-15_SNP_RNA-Y35F-and-126450-HCT-15_SNP_EXOME-Y35F|35f|	SRSF9_p.Y35F	35	HCT-15	CAM	FALSE	TRUE	TRUE	TRUE
DLGDLIEATGFDR	K	R	FALSE	FALSE	L	13	8	20	2	1	0	NA	Q6NXR4	Q6NXR4	1A		sp|Q6NXR4|ENSG00000129696.12|C8orf41|ENST00000613904.1|86116-HCT-15_SNP_RNA-E63G-and-86116-HCT-15_SNP_EXOME-E63G|63g|	C8orf41_p.E63G	63	HCT-15	CAM	FALSE	TRUE	TRUE	TRUE
DMAGAQAAAVALNEEFLK	R	K	FALSE	FALSE	N	18	9	26	2	2	0	2M(15.9949)	Q14126	Q14126	1A		sp|Q14126|ENSG00000046604.12|DSG2|ENST00000261590.12|169179-HCT-15_SNP_RNA-R773K-and-169179-HCT-15_SNP_EXOME-R773K|773k|	DSG2_p.R773K	773	HCT-15	CAM	FALSE	TRUE	TRUE	TRUE
DMELPIEK	K	K	FALSE	FALSE	E	8	17	24	2	4	0	2M(15.9949)	P27816	P27816	1A		sp|P27816-1|ENSG00000047849.21|MAP4|ENST00000360240.10|40535-HCT-15_SNP_RNA-T310I-and-40535-HCT-15_SNP_EXOME-T310I|310i|	MAP4_p.T310I	310	HCT-15	CAM	FALSE	TRUE	TRUE	TRUE
DNAGDWADFWR	R	R	FALSE	FALSE	M	11	1	11	2	3	0	NA	Q9UDY2	Q9UDY2	1A		sp|Q9UDY2-1|ENSG00000119139.18|TJP2|ENST00000377245.8|90437-HCT-15_RARE_RNA-R682W-and-90437-HCT-15_RARE_EXOME-R682W|682w|	TJP2_p.R682W	682	HCT-15	CAM	TRUE	FALSE	TRUE	TRUE
DPNVDLKGPK	K	K	FALSE	FALSE	A	10	1	10	2	1	0	NA	Q8IVF2	Q8IVF2	1A		sp|Q8IVF2-1|ENSG00000185567.6|AHNAK2|ENST00000333244.5|137786-HCT-15_SNP_EXOME-G2755D|2755d|	AHNAK2_p.G2755D	2755	HCT-15	CAM	FALSE	TRUE	FALSE	TRUE
DREAAEGLGSHER	K	R	FALSE	FALSE	A	13	3	15	3	7	0	NA	P17655	P17655	1A		sp|P17655-1|ENSG00000162909.17|CAPN2|ENST00000295006.5|8501-HCT-15_SNP_RNA-D22E-and-8501-HCT-15_SNP_EXOME-D22E|22e|	CAPN2_p.D22E	22	HCT-15	CAM	FALSE	TRUE	TRUE	TRUE
DSRPSQAAGDNQGDEVK	K	K	FALSE	FALSE	E	17	3	19	2, 3	2	0	NA	Q9Y2W1	Q9Y2W1	1A		sp|Q9Y2W1|ENSG00000054118.13|THRAP3|ENST00000354618.9|2173-HCT-15_SNP_RNA-A201V-and-2173-HCT-15_SNP_EXOME-A201V|201v|	THRAP3_p.A201V	201	HCT-15	CAM	FALSE	TRUE	TRUE	TRUE
DSRPSQAAGDNQGDEVKEQTFSGGTS	K	S	FALSE	FALSE	Q	26	3	28	3	2	0	NA	Q9Y2W1	Q9Y2W1	1A		sp|Q9Y2W1|ENSG00000054118.13|THRAP3|ENST00000354618.9|2173-HCT-15_SNP_RNA-A201V-and-2173-HCT-15_SNP_EXOME-A201V|201v|	THRAP3_p.A201V	201	HCT-15	CAM	FALSE	TRUE	TRUE	TRUE
DSRPSQAAGDNQGDEVKEQTFSGGTSQDTK	K	K	FALSE	FALSE	A	30	3	32	3, 4	8	0	NA	Q9Y2W1	Q9Y2W1	1A		sp|Q9Y2W1|ENSG00000054118.13|THRAP3|ENST00000354618.9|2173-HCT-15_SNP_RNA-A201V-and-2173-HCT-15_SNP_EXOME-A201V|201v|	THRAP3_p.A201V	201	HCT-15	CAM	FALSE	TRUE	TRUE	TRUE
DVGEWQHEEFYR	K	R	FALSE	FALSE	Y	12	17	28	2, 3	7	0	NA	Q12931	Q12931	1A		sp|Q12931-1|ENSG00000126602.10|TRAP1|ENST00000246957.9|151786-HCT-15_SNP_RNA-R307G-and-151786-HCT-15_SNP_EXOME-R307G|307g|	TRAP1_p.R307G	307	HCT-15	CAM	FALSE	TRUE	TRUE	TRUE
DYNDAAMAR	R	R	FALSE	FALSE	L	9	10	18	2	2	0	NA	Q14696	Q14696	1A		sp|Q14696-1|ENSG00000117899.10|MESDC2|ENST00000619987.4|144745-HCT-15_RARE_RNA-D62A-and-144745-HCT-15_RARE_EXOME-D62A|62a|	MESDC2_p.D62A	62	HCT-15	CAM	TRUE	FALSE	TRUE	TRUE
EAAEGLGSHER	R	R	FALSE	FALSE	A	11	5	15	2	1	0	NA	P17655	P17655	1A		sp|P17655-1|ENSG00000162909.17|CAPN2|ENST00000295006.5|8501-HCT-15_SNP_RNA-D22E-and-8501-HCT-15_SNP_EXOME-D22E|22e|	CAPN2_p.D22E	22	HCT-15	CAM	FALSE	TRUE	TRUE	TRUE
EAAGEGPALYEDPPDHK	K	K	FALSE	FALSE	T	17	7	23	2, 3	11	0	NA	P27695	P27695	1A		sp|P27695|ENSG00000100823.11|APEX1|ENST00000555414.5|130585-HCT-15_SNP_RNA-Q51H-and-130585-HCT-15_SNP_EXOME-Q51H|51h|	APEX1_p.Q51H	51	HCT-15	CAM	FALSE	TRUE	TRUE	TRUE
EAGFPPGVVNIITGYGPTAGAAIAQHMDVDK	K	K	FALSE	FALSE	V	31	20	50	3	5	0	NA	P30837	P30837	1A		sp|P30837|ENSG00000137124.7|ALDH1B1|ENST00000377698.3|90100-HCT-15_SNP_RNA-V253M-and-90100-HCT-15_SNP_EXOME-V253M|253m|	ALDH1B1_p.V253M	253	HCT-15	CAM	FALSE	TRUE	TRUE	TRUE
EAGFPPGVVNIITGYGPTAGAAIAQHMDVDKVAFTGSTEVGHLIQK	K	K	FALSE	FALSE	A	46	20	65	4, 5	4	0	NA	P30837	P30837	1A		sp|P30837|ENSG00000137124.7|ALDH1B1|ENST00000377698.3|90100-HCT-15_SNP_RNA-V253M-and-90100-HCT-15_SNP_EXOME-V253M|253m|	ALDH1B1_p.V253M	253	HCT-15	CAM	FALSE	TRUE	TRUE	TRUE
EAGLFVPR	K	R	FALSE	FALSE	S	8	1	8	2	2	0	NA	P53396	P53396	1A		sp|P53396-1|ENSG00000131473.16|ACLY|ENST00000352035.6|165034-HCT-15_RARE_RNA-V784L-and-165034-HCT-15_RARE_EXOME-V784L|784l|	ACLY_p.V784L	784	HCT-15	CAM	TRUE	FALSE	TRUE	TRUE
EALDVLDAVLK	R	K	FALSE	FALSE	A	11	6	16	2	2	0	NA	Q92552	Q92552	1A		sp|Q92552-1|ENSG00000113048.16|MRPS27|ENST00000261413.9|59502-HCT-15_SNP_RNA-G284D-and-59502-HCT-15_SNP_EXOME-G284D|284d|	MRPS27_p.G284D	284	HCT-15	CAM	FALSE	TRUE	TRUE	TRUE
EAPAGPLEEDDLEPLTLAPTPAPRPPQDLIGLR	K	R	FALSE	FALSE	L	33	9	41	3	3	0	NA	Q92797	Q92797	1A		sp|Q92797-1|ENSG00000125755.18|SYMPK|ENST00000245934.11|183215-HCT-15_RARE_RNA-A1129T-and-183215-HCT-15_RARE_EXOME-A1129T|1129t|	SYMPK_p.A1129T	1129	HCT-15	CAM	TRUE	FALSE	TRUE	TRUE
EDQTLALLSQFK	R	K	FALSE	FALSE	S	12	1	12	2	3	0	NA	Q6UX04	Q6UX04	1A		sp|Q6UX04-1|ENSG00000153015.15|CWC27|ENST00000381070.7|54388-HCT-15_RARE_RNA-N390S-and-54388-HCT-15_RARE_EXOME-N390S|390s|	CWC27_p.N390S	390	HCT-15	CAM	TRUE	FALSE	TRUE	TRUE
EEPISSGPEEAVGK	K	K	FALSE	FALSE	S	14	1	14	2	1	0	NA	O00567	O00567	1A		sp|O00567|ENSG00000101361.16|NOP56|ENST00000329276.9|185156-HCT-15_RARE_RNA-V568I-and-185156-HCT-15_RARE_EXOME-V568I|568i|	NOP56_p.V568I	568	HCT-15	CAM	TRUE	FALSE	TRUE	TRUE
EFAGSLGIPFLETSAK	K	K	FALSE	FALSE	N	16	12	27	2	8	0	NA	Q9H0U4	Q9H0U4	1A		sp|Q9H0U4|ENSG00000174903.15|RAB1B|ENST00000311481.10|106330-HCT-15_RARE_RNA-D141G-and-106330-HCT-15_RARE_EXOME-D141G|141g|	RAB1B_p.D141G	141	HCT-15	CAM	TRUE	FALSE	TRUE	TRUE
EFSPFGTITSANVMMEGGR	K	R	FALSE	FALSE	S	19	1	19	2	9	0	14M(15.9949), 15M(15.9949)	Q9H361	Q9H361	1A		sp|Q9H361|ENSG00000151846.8|PABPC3|ENST00000281589.4|127260-HCT-15_RARE_RNA-K324N,127260-HCT-15_RARE_RNA-A313E|313e324n|;sp|P11940-1|ENSG00000070756.15|PABPC1|ENST00000318607.9|87770-HCT-15_RARE_EXOME-K324N|324n|	PABPC3_p.K324N,A313E;PABPC1_p.K324N	324,313;324	HCT-15	CAM	TRUE	FALSE	TRUE	TRUE
EHSLLHGDFHAFSAGPGLFSYIR	K	R	FALSE	FALSE	H	23	5	27	4	1	0	NA	P08195	P08195	1A		sp|P08195-1|ENSG00000168003.16|SLC3A2|ENST00000377890.6|105694-HCT-15_RARE_RNA-R534H-and-105694-HCT-15_RARE_EXOME-R534H|534h|	SLC3A2_p.R534H	534	HCT-15	CAM	TRUE	FALSE	TRUE	TRUE
ELDECFAQANDQMETLDSLIR	R	R	FALSE	FALSE	E	21	1	21	3	7	0	5C(56.0374)	P15924	P15924	1A	110	sp|P15924-1|ENSG00000096696.13|DSP|ENST00000379802.7|62914-HCT-15_RARE_RNA-I120T-and-62914-HCT-15_RARE_EXOME-I120T|120t|	DSP_p.I120T	120	HCT-15	CAM	TRUE	FALSE	TRUE	TRUE
ELEIMQILTR	K	R	FALSE	FALSE	V	10	20	29	2	1	0	NA	P55210	P55210	1A		sp|P55210-1|ENSG00000165806.19|CASP7|ENST00000621345.4|99029-HCT-15_SNP_RNA-D255E-and-99029-HCT-15_SNP_EXOME-D255E|255e|	CASP7_p.D255E	255	HCT-15	CAM	FALSE	TRUE	TRUE	TRUE
ENLQLETR	R	R	FALSE	FALSE	R	8	1	8	2	1	0	NA	O60437	O60437	1A		sp|O60437|ENSG00000118898.15|PPL|ENST00000345988.6|152024-HCT-15_SNP_RNA-Q1573E-and-152024-HCT-15_SNP_EXOME-Q1573E|1573e|	PPL_p.Q1573E	1573	HCT-15	CAM	FALSE	TRUE	TRUE	TRUE
ENSHFFVATFAR	K	R	FALSE	FALSE	E	12	11	22	3	1	0	NA	Q15814	Q15814	1A		sp|Q15814|ENSG00000124659.6|TBCC|ENST00000372876.1|69012-HCT-15_SNP_RNA-V65A-and-69012-HCT-15_SNP_EXOME-V65A|65a|	TBCC_p.V65A	65	HCT-15	CAM	FALSE	TRUE	TRUE	TRUE
EPSDTSAAFESTAK	K	K	FALSE	FALSE	E	14	6	19	2	1	0	NA	Q8NI08	Q8NI08	1A		sp|Q8NI08-1|ENSG00000111912.19|NCOA7|ENST00000368357.7|66140-HCT-15_SNP_RNA-S399A-and-66140-HCT-15_SNP_EXOME-S399A|399a|	NCOA7_p.S399A	399	HCT-15	CAM	FALSE	TRUE	TRUE	TRUE
EPWLLPSQHNDIIQDALGQR	R	R	FALSE	FALSE	Y	20	13	32	3	6	0	NA	Q14697	Q14697	1A		sp|Q14697-1|ENSG00000089597.16|GANAB|ENST00000356638.7|112080-HCT-15_SNP_RNA-R698Q-and-112080-HCT-15_SNP_EXOME-R698Q|698q|	GANAB_p.R698Q	698	HCT-15	CAM	FALSE	TRUE	TRUE	TRUE
EQALQEAMEQLEELELERK	K	K	FALSE	FALSE	Q	19	6	24	3	1	0	NA	Q9UH65	Q9UH65	1A		sp|Q9UH65|ENSG00000133789.14|SWAP70|ENST00000318950.10|103721-HCT-15_SNP_RNA-Q505E-and-103721-HCT-15_SNP_EXOME-Q505E|505e|	SWAP70_p.Q505E	505	HCT-15	CAM	FALSE	TRUE	TRUE	TRUE
EQEWGIIPNQSR	R	R	FALSE	FALSE	A	12	6	17	2	1	0	NA	O95049	O95049	1A		sp|O95049-1|ENSG00000105289.14|TJP3|ENST00000541714.6|172762-HCT-15_SNP_RNA-R536W-and-172762-HCT-15_SNP_EXOME-R536W|536w|	TJP3_p.R536W	536	HCT-15	CAM	FALSE	TRUE	TRUE	TRUE
EQLEAAKPEPIIEEVDLANLAPR	K	R	FALSE	FALSE	K	23	3	25	3	2	0	NA	Q8WUD4	Q8WUD4	1A		sp|Q8WUD4|ENSG00000160799.11|CCDC12|ENST00000425441.5|40450-HCT-15_SNP_RNA-V98I-and-40450-HCT-15_SNP_EXOME-V98I|98i|	CCDC12_p.V98I	98	HCT-15	CAM	FALSE	TRUE	TRUE	TRUE
EQLQQEQALLEEIER	R	R	FALSE	FALSE	H	15	1	15	2	2	0	NA	Q15149	Q15149	1A		sp|Q15149-1|ENSG00000178209.14|PLEC|ENST00000322810.8|89058-HCT-15_SNP_RNA-R1386Q-and-89058-HCT-15_SNP_EXOME-R1386Q|1386q|	PLEC_p.R1386Q	1386	HCT-15	CAM	FALSE	TRUE	TRUE	TRUE
ESLLSSDSLSQVFLHLSTLDR	R	R	FALSE	FALSE	S	21	5	25	3	2	0	NA	Q9NRL2	Q9NRL2	1A		sp|Q9NRL2-1|ENSG00000198604.10|BAZ1A|ENST00000382422.6|135486-HCT-15_RARE_RNA-A1124D-and-135486-HCT-15_RARE_EXOME-A1124D|1124d|	BAZ1A_p.A1124D	1124	HCT-15	CAM	TRUE	FALSE	TRUE	TRUE
ESYPHVK	K	K	FALSE	FALSE	T	7	25	31	2	2	0	NA	O60664	O60664	1A		sp|O60664-1|ENSG00000105355.8|PLIN3|ENST00000221957.8|179418-HCT-15_SNP_RNA-I56V-and-179418-HCT-15_SNP_EXOME-I56V|56v|	PLIN3_p.I56V	56	HCT-15	CAM	FALSE	TRUE	TRUE	TRUE
ETFLDPFILR	K	R	FALSE	FALSE	D	10	1	10	2	2	0	NA	P23470	P23470	1A		sp|P23470-1|ENSG00000144724.19|PTPRG|ENST00000474889.5|35379-HCT-15_SNP_RNA-V237I-and-35379-HCT-15_SNP_EXOME-V237I|237i|	PTPRG_p.V237I	237	HCT-15	CAM	FALSE	TRUE	TRUE	TRUE
EVAMLGAPHNPAPPMSTVIHIR	Q	R	FALSE	FALSE	S	22	1	22	3	1	0	4M(15.9949)	Q01629	Q01629	1A		sp|Q01629|ENSG00000185201.16|IFITM2|ENST00000616316.1|102873-HCT-15_SNP_RNA-V33A-and-102873-HCT-15_SNP_EXOME-V33A|33a|	IFITM2_p.V33A	33	HCT-15	CAM	FALSE	TRUE	TRUE	TRUE
EVSSSFDQVIK	K	K	FALSE	FALSE	E	11	1	11	2	1	0	NA	Q9Y6C9	Q9Y6C9	1A		sp|Q9Y6C9|ENSG00000109919.9|MTCH2|ENST00000302503.7|111432-HCT-15_SNP_RNA-H119Q-and-111432-HCT-15_SNP_EXOME-H119Q|119q|	MTCH2_p.H119Q	119	HCT-15	CAM	FALSE	TRUE	TRUE	TRUE
EWSLELSPAQNWTPPQPR	R	R	FALSE	FALSE	T	18	11	28	2	2	0	NA	Q8N6T3	Q8N6T3	1A		sp|Q8N6T3-1|ENSG00000101199.12|ARFGAP1|ENST00000370283.8|187237-HCT-15_SNP_RNA-S128L-and-187237-HCT-15_SNP_EXOME-S128L|128l|	ARFGAP1_p.S128L	128	HCT-15	CAM	FALSE	TRUE	TRUE	TRUE
FAEAFEDIPR	K	R	FALSE	FALSE	A	10	22	31	2	8	0	NA	P50990	P50990	1A		sp|P50990-1|ENSG00000156261.12|CCT8|ENST00000286788.8|191141-HCT-15_RARE_RNA-A447D-and-191141-HCT-15_RARE_EXOME-A447D|447d|	CCT8_p.A447D	447	HCT-15	CAM	TRUE	FALSE	TRUE	TRUE
FAGGDYTTTIESFISASGR	K	R	FALSE	FALSE	A	19	1	19	2	3	0	NA	P07814	P07814	1A		sp|P07814|ENSG00000136628.17|EPRS|ENST00000366923.7|17120-HCT-15_RARE_RNA-A1227S-and-17120-HCT-15_RARE_EXOME-A1227S|1227s|	EPRS_p.A1227S	1227	HCT-15	CAM	TRUE	FALSE	TRUE	TRUE
FAQANDQMETLDSLIR	C	R	TRUE	FALSE	E	16	1	16	2	1	0	NA	P15924	P15924	1A		sp|P15924-1|ENSG00000096696.13|DSP|ENST00000379802.7|62914-HCT-15_RARE_RNA-I120T-and-62914-HCT-15_RARE_EXOME-I120T|120t|	DSP_p.I120T	120	HCT-15	CAM	TRUE	FALSE	TRUE	TRUE
FASEIAGVDELGTTGR	R	R	FALSE	FALSE	G	16	6	21	2	1	0	NA	P28331	P28331	1A		sp|P28331-1|ENSG00000023228.13|NDUFS1|ENST00000449699.5|31574-HCT-15_RARE_RNA-D194E-and-31574-HCT-15_RARE_EXOME-D194E|194e|	NDUFS1_p.D194E	194	HCT-15	CAM	TRUE	FALSE	TRUE	TRUE
FDLIFLMLDPQDEAYDRR	R	R	FALSE	FALSE	L	18	19	36	3	2	0	NA	P33991	P33991	1A		sp|P33991|ENSG00000104738.16|MCM4|ENST00000523944.5|82968-HCT-15_SNP_RNA-L650M-and-82968-HCT-15_SNP_EXOME-L650M|650m|	MCM4_p.L650M	650	HCT-15	CAM	FALSE	TRUE	TRUE	TRUE
FFDANYDGKDYDHVAAR	K	R	FALSE	FALSE	Q	17	1	17	4	3	0	NA	Q15691	Q15691	1A		sp|Q15691|ENSG00000101367.8|MAPRE1|ENST00000375571.5|185898-HCT-15_RARE_RNA-P126H-and-185898-HCT-15_RARE_EXOME-P126H|126h|	MAPRE1_p.P126H	126	HCT-15	CAM	TRUE	FALSE	TRUE	TRUE
FFGSLPDSWAR	K	R	FALSE	FALSE	G	11	11	21	2	1	0	NA	Q9BUP3	Q9BUP3	1A		sp|Q9BUP3-1|ENSG00000109854.13|HTATIP2|ENST00000421577.6|104095-HCT-15_SNP_RNA-S197R-and-104095-HCT-15_SNP_EXOME-S197R|197r|	HTATIP2_p.S197R	197	HCT-15	CAM	FALSE	TRUE	TRUE	TRUE
FGGGNPELLTHMVSK	R	K	FALSE	FALSE	G	15	8	22	3	4	0	12M(15.9949)	P40939	P40939	1A		sp|P40939-1|ENSG00000084754.11|HADHA|ENST00000380649.7|26387-HCT-15_RARE_RNA-Q621H-and-26387-HCT-15_RARE_EXOME-Q621H|621h|	HADHA_p.Q621H	621	HCT-15	CAM	TRUE	FALSE	TRUE	TRUE
FIHQVNQAAVTIQR	R	R	FALSE	FALSE	W	14	14	27	3	1	0	NA	Q9UPN4	Q9UPN4	1A		sp|Q9UPN4-1|ENSG00000141577.13|CEP131|ENST00000269392.8|167950-HCT-15_SNP_RNA-T272A-and-167950-HCT-15_SNP_EXOME-T272A|272a|	CEP131_p.T272A	272	HCT-15	CAM	FALSE	TRUE	TRUE	TRUE
FIIHVPPGEFNEVFNDVR	K	R	FALSE	FALSE	L	18	7	24	2, 3	12	0	NA	P47755	P47755	1A		sp|P47755-1|ENSG00000198898.13|CAPZA2|ENST00000361183.7|75174-HCT-15_RARE_RNA-A24V-and-75174-HCT-15_RARE_EXOME-A24V|24v|	CAPZA2_p.A24V	24	HCT-15	CAM	TRUE	FALSE	TRUE	TRUE
FIQENVFVAANHNASPLSIK	R	K	FALSE	FALSE	E	20	6	25	3	4	0	NA	P11172	P11172	1A		sp|P11172-1|ENSG00000114491.13|UMPS|ENST00000232607.6|36507-HCT-15_SNP_RNA-G213A-and-36507-HCT-15_SNP_EXOME-G213A|213a|	UMPS_p.G213A	213	HCT-15	CAM	FALSE	TRUE	TRUE	TRUE
FLSSSPHLPPSSYFNANGR	K	R	FALSE	FALSE	A	19	13	31	3	5	0	NA	O14773	O14773	1A		sp|O14773-1|ENSG00000166340.16|TPP1|ENST00000299427.11|109975-HCT-15_RARE_RNA-S445N-and-109975-HCT-15_RARE_EXOME-S445N|445n|	TPP1_p.S445N	445	HCT-15	CAM	TRUE	FALSE	TRUE	TRUE
FNLSQESSYIATQYSLRPR	K	R	FALSE	FALSE	R	19	8	26	3	2	0	NA	Q14739	Q14739	1A		sp|Q14739|ENSG00000143815.14|LBR|ENST00000272163.8|17298-HCT-15_SNP_RNA-S154N-and-17298-HCT-15_SNP_EXOME-S154N|154n|	LBR_p.S154N	154	HCT-15	CAM	FALSE	TRUE	TRUE	TRUE
FSKEEPVSSGPEEAAGK	K	K	FALSE	FALSE	S	17	7	23	3	1	0	NA	O00567	O00567	1A		sp|O00567|ENSG00000101361.16|NOP56|ENST00000329276.9|185156-HCT-15_SNP_RNA-V576A-and-185156-HCT-15_SNP_EXOME-V576A|576a|	NOP56_p.V576A	576	HCT-15	CAM	FALSE	TRUE	TRUE	TRUE
FSVPVQHFCGGNPSTPIQVR	R	R	FALSE	FALSE	C	20	1	20	4	1	0	9C(56.0374)	Q99829	Q99829	1A	200	sp|Q99829|ENSG00000214078.12|CPNE1|ENST00000352393.8|188439-HCT-15_SNP_EXOME-Q211R|211r|	CPNE1_p.Q211R	211	HCT-15	CAM	FALSE	TRUE	FALSE	TRUE
FTTLEGMLK	K	K	FALSE	FALSE	D	9	26	34	2	1	0	NA	O75312	O75312	1A		sp|O75312|ENSG00000109917.10|ZPR1|ENST00000227322.7|114665-HCT-15_RARE_RNA-L357M-and-114665-HCT-15_RARE_EXOME-L357M|357m|	ZPR1_p.L357M	357	HCT-15	CAM	TRUE	FALSE	TRUE	TRUE
FTVGDHSR	K	R	FALSE	FALSE	F	8	5	12	2	5	0	NA	O75083	O75083	1A		sp|O75083-1|ENSG00000071127.16|WDR1|ENST00000499869.6|49631-HCT-15_SNP_EXOME-I185V|185v|	WDR1_p.I185V	185	HCT-15	CAM	FALSE	TRUE	FALSE	TRUE
FVALDFEQEMATVASSSSLEKSYELPDGQVITIGNER	C	R	TRUE	FALSE	F	37	1	37	4	1	0	10M(15.9949)	A5A3E0	A5A3E0	1A		sp|A5A3E0|ENSG00000196604.12|POTEF|ENST00000409914.6|29568-HCT-15_RARE_EXOME-Y918F|918f|	POTEF_p.Y918F	918	HCT-15	CAM	TRUE	FALSE	FALSE	TRUE
FVTDQGACAGSPSLVAATR	R	R	FALSE	FALSE	R	19	8	26	2	3	0	NA	Q96GM1	Q96GM1	1A	191	sp|Q96GM1-1|ENSG00000105520.10|PLPPR2|ENST00000251473.9|173637-HCT-15_RARE_RNA-A201T-and-173637-HCT-15_RARE_EXOME-A201T|201t|	PLPPR2_p.A201T	201	HCT-15	CAM	TRUE	FALSE	TRUE	TRUE
FWRPEEPIEVIRPDIAALVR	K	R	FALSE	FALSE	Q	20	14	33	3, 4	2	0	NA	Q8TED1	Q8TED1	1A		sp|Q8TED1|ENSG00000164294.13|GPX8|ENST00000503787.5|54220-HCT-15_SNP_RNA-K182R-and-54220-HCT-15_SNP_EXOME-K182R|182r|	GPX8_p.K182R	182	HCT-15	CAM	FALSE	TRUE	TRUE	TRUE
GCEENLDEAR	K	R	FALSE	FALSE	E	10	1	10	2	2	0	2C(56.0374)	P35611	P35611	1A	586	sp|P35611-1|ENSG00000087274.16|ADD1|ENST00000398129.5|45522-HCT-15_SNP_EXOME-S586C|586c|	ADD1_p.S586C	586	HCT-15	CAM	FALSE	TRUE	FALSE	TRUE
GDSEPTPGCSGLGPDGVR	R	R	FALSE	FALSE	G	18	1	18	3	3	0	9C(56.0374)	Q8WW01	Q8WW01	1A	13	sp|Q8WW01-1|ENSG00000198860.12|TSEN15|ENST00000645668.1|7351-HCT-15_SNP_RNA-G19D-and-7351-HCT-15_SNP_EXOME-G19D|19d|	TSEN15_p.G19D	19	HCT-15	CAM	FALSE	TRUE	TRUE	TRUE
GDYIGSTYFER	R	R	FALSE	FALSE	C	11	6	16	2	5	0	NA	P61081	P61081	1A		sp|P61081|ENSG00000130725.7|UBE2M|ENST00000253023.7|185046-HCT-15_RARE_RNA-G171D-and-185046-HCT-15_RARE_EXOME-G171D|171d|	UBE2M_p.G171D	171	HCT-15	CAM	TRUE	FALSE	TRUE	TRUE
GEHTPSALAIMENANVLARYASICQQNGIVPIVEPEILPDGGHDLK	L	K	FALSE	FALSE	R	46	1	46	5	1	0	24C(56.0374)	P04075	P04075	1A	178	sp|P04075-1|ENSG00000149925.18|ALDOA|ENST00000569545.5|147948-HCT-15_RARE_RNA-D196G-and-147948-HCT-15_RARE_EXOME-D196G|196g|	ALDOA_p.D196G	196	HCT-15	CAM	TRUE	FALSE	TRUE	TRUE
GFGFVTFDDHDPVDKIALQK	R	K	FALSE	FALSE	Y	20	5	24	3, 4	10	0	NA	P22626	P22626	1A		sp|P22626-1|ENSG00000122566.20|HNRNPA2B1|ENST00000354667.8|77381-HCT-15_RARE_EXOME-V170A|170a|	HNRNPA2B1_p.V170A	170	HCT-15	CAM	TRUE	FALSE	FALSE	TRUE
GFGFVTFDDHDPVDKIALQKYHTINGHNAEVR	R	R	FALSE	FALSE	K	32	5	36	6	2	0	NA	P22626	P22626	1A		sp|P22626-1|ENSG00000122566.20|HNRNPA2B1|ENST00000354667.8|77381-HCT-15_RARE_EXOME-V170A|170a|	HNRNPA2B1_p.V170A	170	HCT-15	CAM	TRUE	FALSE	FALSE	TRUE
GFGTDEQAIVDVVANCSNDQR	K	R	FALSE	FALSE	Q	21	7	27	3	4	0	16C(56.0374)	P20073	P20073	1A	215	sp|P20073-1|ENSG00000138279.15|ANXA7|ENST00000372919.8|101160-HCT-15_RARE_RNA-R215C-and-101160-HCT-15_RARE_EXOME-R215C|215c|	ANXA7_p.R215C	215	HCT-15	CAM	TRUE	FALSE	TRUE	TRUE
GFTTAGVLAAHK	K	K	FALSE	FALSE	L	12	18	29	3	3	0	NA	P32322	P32322	1A		sp|P32322-1|ENSG00000183010.16|PYCR1|ENST00000619204.4|168184-HCT-15_RARE_EXOME-A21T|21t|	PYCR1_p.A21T	21	HCT-15	CAM	TRUE	FALSE	FALSE	TRUE
GGEEGGASGGGPGAGSGSAGGLAPR	V	R	FALSE	FALSE	K	25	1	25	4	1	0	NA	Q9UJU5	Q9UJU5	1A		sp|Q9UJU5|ENSG00000187140.5|FOXD3|ENST00000371116.3|3477-HCT-15_RARE_EXOME-S133R|133r|	FOXD3_p.S133R	133	HCT-15	CAM	TRUE	FALSE	FALSE	TRUE
GGQGDPDVPAQQPADPSTPER	R	R	FALSE	FALSE	Q	21	8	28	2	3	0	NA	O15231	O15231	1A		sp|O15231-1|ENSG00000147394.18|ZNF185|ENST00000370268.8|199483-HCT-15_RARE_EXOME-A436D|436d|	ZNF185_p.A436D	436	HCT-15	CAM	TRUE	FALSE	FALSE	TRUE
GGSYSQAASSDSAQGSDVSLTAC	K	C	FALSE	TRUE	K	23	1	23	2	6	0	23C(56.0374)	P04439	P04439	1A	363	sp|P04439|ENSG00000206503.12|HLA-A|ENST00000396634.5|63676-HCT-15_SNP_EXOME-T345S|345s|	HLA-A_p.T345S	345	HCT-15	CAM	FALSE	TRUE	FALSE	TRUE
GIIDLIEER	K	R	FALSE	FALSE	A	9	22	30	2	2	0	NA	Q96RP9	Q96RP9	1A		sp|Q96RP9-1|ENSG00000168827.14|GFM1|ENST00000486715.5|37581-HCT-15_SNP_RNA-V215I-and-37581-HCT-15_SNP_EXOME-V215I|215i|	GFM1_p.V215I	215	HCT-15	CAM	FALSE	TRUE	TRUE	TRUE
GISEDSHLESLQDVGQSAAPTFMISPETITGTGK	K	K	FALSE	FALSE	K	34	1	34	3	14	0	23M(15.9949)	P27816	P27816	1A		sp|P27816-1|ENSG00000047849.21|MAP4|ENST00000360240.10|40535-HCT-15_SNP_EXOME-V628I|628i|	MAP4_p.V628I	628	HCT-15	CAM	FALSE	TRUE	FALSE	TRUE
GISFDAAATSGGSASSEK	R	K	FALSE	FALSE	A	18	8	25	2	1	0	NA	P13804	P13804	1A		sp|P13804-1|ENSG00000140374.15|ETFA|ENST00000557943.5|144492-HCT-15_SNP_RNA-T171I-and-144492-HCT-15_SNP_EXOME-T171I|171i|	ETFA_p.T171I	171	HCT-15	CAM	FALSE	TRUE	TRUE	TRUE
GIVPIVEPEILPDGGHDLK	N	K	FALSE	FALSE	R	19	1	19	3	2	0	NA	P04075	P04075	1A		sp|P04075-1|ENSG00000149925.18|ALDOA|ENST00000569545.5|147948-HCT-15_RARE_RNA-D196G-and-147948-HCT-15_RARE_EXOME-D196G|196g|	ALDOA_p.D196G	196	HCT-15	CAM	TRUE	FALSE	TRUE	TRUE
GLVEPVNMVDNGDGTHTVTYTPSQEGPYMVSVK	R	K	FALSE	FALSE	Y	33	1	33	3	11	0	8M(15.9949)	O75369	O75369	1A		sp|O75369-1|ENSG00000136068.14|FLNB|ENST00000295956.8|35308-HCT-15_SNP_RNA-V1471M-and-35308-HCT-15_SNP_EXOME-V1471M|1471m|	FLNB_p.V1471M	1471	HCT-15	CAM	FALSE	TRUE	TRUE	TRUE
GNTISHIIK	R	K	FALSE	FALSE	L	9	1	9	2	3	0	NA	Q06203	Q06203	1A		sp|Q06203|ENSG00000128059.8|PPAT|ENST00000264220.6|50419-HCT-15_RARE_RNA-P400H-and-50419-HCT-15_RARE_EXOME-P400H|400h|	PPAT_p.P400H	400	HCT-15	CAM	TRUE	FALSE	TRUE	TRUE
GPGAGEGPGGAFAR	K	R	FALSE	FALSE	V	14	1	14	2	1	0	NA	A8K0Z3	A8K0Z3	1A		sp|A8K0Z3|ENSG00000181404.16|WASHC1|ENST00000442898.4|92780-HCT-15_SNP_RNA-V439A-and-92780-HCT-15_SNP_EXOME-V439A|439a|	WASHC1_p.V439A	439	HCT-15	CAM	FALSE	TRUE	TRUE	TRUE
GQELAFPLSPDWQVDYELYTWR	R	R	FALSE	FALSE	K	22	1	22	2	2	0	NA	P26641	P26641	1A		sp|P26641-1|ENSG00000254772.9|EEF1G|ENST00000329251.4|112031-HCT-15_RARE_RNA-S396L-and-112031-HCT-15_RARE_EXOME-S396L|396l|	EEF1G_p.S396L	396	HCT-15	CAM	TRUE	FALSE	TRUE	TRUE
GRNLFVVLAHEIGHTIGLTHSPAPR	R	R	FALSE	FALSE	A	25	5	29	3	1	0	NA	Q9H239	Q9H239	1A		sp|Q9H239-1|ENSG00000271447.5|MMP28|ENST00000605424.5|164390-HCT-15_RARE_EXOME-L246I|246i|	MMP28_p.L246I	246	HCT-15	CAM	TRUE	FALSE	FALSE	TRUE
GSGLGGLTDKLTQAQIFDYSEIPNFPR	C	R	TRUE	FALSE	S	27	10	36	3	1	0	NA	P00491	P00491	1A		sp|P00491|ENSG00000198805.11|PNP|ENST00000361505.9|130606-HCT-15_SNP_RNA-G51S-and-130606-HCT-15_SNP_EXOME-G51S|51s|	PNP_p.G51S	51	HCT-15	CAM	FALSE	TRUE	TRUE	TRUE
GTEGKEPEEGVTVESQPQVK	K	K	FALSE	FALSE	V	20	9	28	3	4	0	NA	O15446	O15446	1A		sp|O15446-1|ENSG00000117877.10|CD3EAP|ENST00000309424.7|176796-HCT-15_RARE_RNA-M299K-and-176796-HCT-15_RARE_EXOME-M299K|299k|	CD3EAP_p.M299K	299	HCT-15	CAM	TRUE	FALSE	TRUE	TRUE
GVVPLAGTNGETTIQGLDGLSER	K	R	FALSE	FALSE	C	23	6	28	2	10	0	NA	P04075	P04075	1A		sp|P04075-1|ENSG00000149925.18|ALDOA|ENST00000569545.5|147948-HCT-15_RARE_EXOME-T125I|125i|	ALDOA_p.T125I	125	HCT-15	CAM	TRUE	FALSE	FALSE	TRUE
HASSGSFLSSANEHLKEDLNLR	R	R	FALSE	FALSE	L	22	7	28	4	3	0	NA	O76003	O76003	1A		sp|O76003|ENSG00000108010.11|GLRX3|ENST00000331244.9|99420-HCT-15_SNP_RNA-P123S-and-99420-HCT-15_SNP_EXOME-P123S|123s|	GLRX3_p.P123S	123	HCT-15	CAM	FALSE	TRUE	TRUE	TRUE
HGYFDEEMNR	R	R	FALSE	FALSE	V	10	1	10	2	1	0	NA	Q15149	Q15149	1A		sp|Q15149-1|ENSG00000178209.14|PLEC|ENST00000322810.8|89058-HCT-15_SNP_RNA-R2969H-and-89058-HCT-15_SNP_EXOME-R2969H|2969h|	PLEC_p.R2969H	2969	HCT-15	CAM	FALSE	TRUE	TRUE	TRUE
IATSPASQLSPTELTEMR	F	R	FALSE	FALSE	N	18	1	18	2	2	0	NA	Q9NYK5	Q9NYK5	1A		sp|Q9NYK5-1|ENSG00000154719.13|MRPL39|ENST00000352957.8|191066-HCT-15_SNP_RNA-S31P-and-191066-HCT-15_SNP_EXOME-S31P|31p|	MRPL39_p.S31P	31	HCT-15	CAM	FALSE	TRUE	TRUE	TRUE
ICIDSLSAQLSQLQK	R	K	FALSE	FALSE	Q	15	1	15	2, 3	5	0	2C(56.0374)	P02545	P02545	1A	298	sp|P02545-1|ENSG00000160789.19|LMNA|ENST00000368300.8|6152-HCT-15_RARE_RNA-R298C-and-6152-HCT-15_RARE_EXOME-R298C|298c|	LMNA_p.R298C	298	HCT-15	CAM	TRUE	FALSE	TRUE	TRUE
IDAAQNWFADPNGGPEGEEQIR	K	R	FALSE	FALSE	G	22	9	30	2	1	0	NA	P18206	P18206	1A		sp|P18206-1|ENSG00000035403.17|VCL|ENST00000211998.9|97891-HCT-15_RARE_EXOME-L395F|395f|	VCL_p.L395F	395	HCT-15	CAM	TRUE	FALSE	FALSE	TRUE
IDGITIHQSLAIIEYLEETRPTPR	K	R	FALSE	FALSE	L	24	9	32	3, 4	4	0	NA	O43708	O43708	1A		sp|O43708-1|ENSG00000100577.18|GSTZ1|ENST00000216465.9|133045-HCT-15_SNP_RNA-M82T-and-133045-HCT-15_SNP_EXOME-M82T|82t|	GSTZ1_p.M82T	82	HCT-15	CAM	FALSE	TRUE	TRUE	TRUE
IEPDRAQVDEVLQLR	R	R	FALSE	FALSE	E	15	1	15	3	2	0	NA	O60437	O60437	1A		sp|O60437|ENSG00000118898.15|PPL|ENST00000345988.6|152024-HCT-15_SNP_RNA-A1007V-and-152024-HCT-15_SNP_EXOME-A1007V|1007v|	PPL_p.A1007V	1007	HCT-15	CAM	FALSE	TRUE	TRUE	TRUE
IFEEDPAVGAIVLTGGDK	K	K	FALSE	FALSE	A	18	1	18	2	7	0	NA	P30084	P30084	1A		sp|P30084|ENSG00000127884.4|ECHS1|ENST00000368547.3|102799-HCT-15_SNP_RNA-T75I-and-102799-HCT-15_SNP_EXOME-T75I|75i|	ECHS1_p.T75I	75	HCT-15	CAM	FALSE	TRUE	TRUE	TRUE
IFEEDPAVGAIVLTGGDKAFAAGADIK	K	K	FALSE	FALSE	E	27	1	27	3	7	0	NA	P30084	P30084	1A		sp|P30084|ENSG00000127884.4|ECHS1|ENST00000368547.3|102799-HCT-15_SNP_RNA-T75I-and-102799-HCT-15_SNP_EXOME-T75I|75i|	ECHS1_p.T75I	75	HCT-15	CAM	FALSE	TRUE	TRUE	TRUE
IGAAIQEELGYNCQTGGVIAEVLR	K	R	FALSE	FALSE	G	24	1	24	3	4	0	13C(56.0374)	O00567	O00567	1A	112	sp|O00567|ENSG00000101361.16|NOP56|ENST00000329276.9|185156-HCT-15_SNP_EXOME-I121V|121v|	NOP56_p.I121V	121	HCT-15	CAM	FALSE	TRUE	FALSE	TRUE
IGGTNIGEDIR	C	R	TRUE	FALSE	K	11	27	37	2	6	0	NA	P38919	P38919	1A		sp|P38919|ENSG00000141543.9|EIF4A3|ENST00000269349.7|167882-HCT-15_RARE_RNA-V146I-and-167882-HCT-15_RARE_EXOME-V146I|146i|	EIF4A3_p.V146I	146	HCT-15	CAM	TRUE	FALSE	TRUE	TRUE
IIVDANNLTVEIENELNIIHK	R	K	FALSE	FALSE	F	21	18	38	3	2	0	NA	Q8WWY3	Q8WWY3	1A		sp|Q8WWY3-1|ENSG00000105618.13|PRPF31|ENST00000321030.8|177991-HCT-15_RARE_RNA-V92I-and-177991-HCT-15_RARE_EXOME-V92I|92i|	PRPF31_p.V92I	92	HCT-15	CAM	TRUE	FALSE	TRUE	TRUE
ILAAQGQVSAQGGAQPSVEAPAAPRPTATQLTR	K	R	FALSE	FALSE	D	33	9	41	3	1	0	NA	Q9H936	Q9H936	1A		sp|Q9H936|ENSG00000177542.10|SLC25A22|ENST00000320230.9|109391-HCT-15_SNP_RNA-L150V-and-109391-HCT-15_SNP_EXOME-L150V|150v|	SLC25A22_p.L150V	150	HCT-15	CAM	FALSE	TRUE	TRUE	TRUE
ILALAQNK	R	K	FALSE	FALSE	S	8	16	23	2	5	0	NA	Q13838	Q13838	1A		sp|Q13838-1|ENSG00000198563.13|DDX39B|ENST00000396172.5|68143-HCT-15_RARE_RNA-R181Q-and-68143-HCT-15_RARE_EXOME-R181Q|181q|	DDX39B_p.R181Q	181	HCT-15	CAM	TRUE	FALSE	TRUE	TRUE
ILLQDVGGGSWAELGR	C	R	TRUE	FALSE	T	16	1	16	2	1	0	NA	Q99829	Q99829	1A		sp|Q99829|ENSG00000214078.12|CPNE1|ENST00000352393.8|188439-HCT-15_SNP_RNA-V31I-and-188439-HCT-15_SNP_EXOME-V31I|31i|	CPNE1_p.V31I	31	HCT-15	CAM	FALSE	TRUE	TRUE	TRUE
IMLSFHEEQGVLPETFLANFPSLIK	K	K	FALSE	FALSE	M	25	1	25	3	2	0	2M(15.9949)	O60502	O60502	1A		sp|O60502-1|ENSG00000198408.13|MGEA5|ENST00000361464.7|102052-HCT-15_RARE_RNA-E829G-and-102052-HCT-15_RARE_EXOME-E829G|829g|	MGEA5_p.E829G	829	HCT-15	CAM	TRUE	FALSE	TRUE	TRUE
INQEDSVPLISDAVENMDSTLHYIHNDSDLSNNSSFSPDEERR	K	R	FALSE	FALSE	T	43	1	43	5	2	0	NA	Q8TF05	Q8TF05	1A		sp|Q8TF05-1|ENSG00000154845.15|PPP4R1|ENST00000400556.7|170533-HCT-15_SNP_RNA-S593N-and-170533-HCT-15_SNP_EXOME-S593N|593n|	PPP4R1_p.S593N	593	HCT-15	CAM	FALSE	TRUE	TRUE	TRUE
IPTNDESLYDPEKDNR	K	R	FALSE	FALSE	D	16	11	26	3	1	0	NA	Q56P03	Q56P03	1A		sp|Q56P03|ENSG00000129518.8|EAPP|ENST00000250454.7|135458-HCT-15_RARE_RNA-L137S-and-135458-HCT-15_RARE_EXOME-L137S|137s|	EAPP_p.L137S	137	HCT-15	CAM	TRUE	FALSE	TRUE	TRUE
IQPEDMFVYDINEK	R	K	FALSE	FALSE	D	14	1	14	2	2	0	NA	Q96GX9	Q96GX9	1A		sp|Q96GX9-1|ENSG00000149089.12|APIP|ENST00000395787.3|111040-HCT-15_SNP_RNA-C76Y-and-111040-HCT-15_SNP_EXOME-C76Y|76y|	APIP_p.C76Y	76	HCT-15	CAM	FALSE	TRUE	TRUE	TRUE
ISYGPDWKDFYVVEPLAFEGTPEQK	R	K	FALSE	FALSE	A	25	3	27	3	6	0	NA	P06865	P06865	1A		sp|P06865-1|ENSG00000213614.9|HEXA|ENST00000268097.9|144124-HCT-15_SNP_RNA-I436V-and-144124-HCT-15_SNP_EXOME-I436V|436v|	HEXA_p.I436V	436	HCT-15	CAM	FALSE	TRUE	TRUE	TRUE
ITDAYLDQYLR	K	R	FALSE	FALSE	Y	11	27	37	2	2	0	NA	Q6P2Q9	Q6P2Q9	1A		sp|Q6P2Q9|ENSG00000174231.16|PRPF8|ENST00000572621.5|162017-HCT-15_RARE_RNA-W927R-and-162017-HCT-15_RARE_EXOME-W927R|927r|	PRPF8_p.W927R	927	HCT-15	CAM	TRUE	FALSE	TRUE	TRUE
ITGEAFMQFASQELAEK	K	K	FALSE	FALSE	A	17	29	45	2	6	0	NA	P52597	P52597	1A		sp|P52597|ENSG00000169813.16|HNRNPF|ENST00000443950.6|100445-HCT-15_SNP_RNA-V157M-and-100445-HCT-15_SNP_EXOME-V157M|157m|	HNRNPF_p.V157M	157	HCT-15	CAM	FALSE	TRUE	TRUE	TRUE
ITPVSSGSGTMGAAK	K	K	FALSE	FALSE	V	15	20	34	2	4	0	NA	O75955	O75955	1A		sp|O75955-1|ENSG00000137312.14|FLOT1|ENST00000376389.7|68038-HCT-15_RARE_RNA-L380P-and-68038-HCT-15_RARE_EXOME-L380P|380p|	FLOT1_p.L380P	380	HCT-15	CAM	TRUE	FALSE	TRUE	TRUE
KAAAEDVNVTLEDQQK	K	K	FALSE	FALSE	L	16	7	22	3	2	0	NA	Q9NQP4	Q9NQP4	1A		sp|Q9NQP4|ENSG00000101132.9|PFDN4|ENST00000371419.6|186833-HCT-15_RARE_RNA-F17L-and-186833-HCT-15_RARE_EXOME-F17L|17l|	PFDN4_p.F17L	17	HCT-15	CAM	TRUE	FALSE	TRUE	TRUE
KAAVPAPEEEMDECEQALAAEPK	K	K	FALSE	FALSE	A	23	7	29	3, 4	10	0	14C(56.0374)	P26641	P26641	1A	266	sp|P26641-1|ENSG00000254772.9|EEF1G|ENST00000329251.4|112031-HCT-15_RARE_RNA-A256V-and-112031-HCT-15_RARE_EXOME-A256V|256v|	EEF1G_p.A256V	256	HCT-15	CAM	TRUE	FALSE	TRUE	TRUE
KADLINR	R	R	FALSE	FALSE	S	7	19	25	2	3	0	NA	Q8WUM4	Q8WUM4	1A		sp|Q8WUM4-1|ENSG00000170248.13|PDCD6IP|ENST00000307296.7|33852-HCT-15_SNP_RNA-V378I-and-33852-HCT-15_SNP_EXOME-V378I|378i|	PDCD6IP_p.V378I	378	HCT-15	CAM	FALSE	TRUE	TRUE	TRUE
KAFSEYLGTDQSK	K	K	FALSE	FALSE	W	13	21	33	2, 3	5	0	NA	P10768	P10768	1A		sp|P10768|ENSG00000139684.13|ESD|ENST00000378720.7|129610-HCT-15_SNP_RNA-G190E-and-129610-HCT-15_SNP_EXOME-G190E|190e|	ESD_p.G190E	190	HCT-15	CAM	FALSE	TRUE	TRUE	TRUE
KDFVSEQLTSLLVNEVQLPALGENK	R	K	FALSE	FALSE	K	25	17	41	3	1	0	NA	P54136	P54136	1A		sp|P54136-1|ENSG00000113643.8|RARS|ENST00000231572.7|57480-HCT-15_RARE_RNA-G182E-and-57480-HCT-15_RARE_EXOME-G182E|182e|	RARS_p.G182E	182	HCT-15	CAM	TRUE	FALSE	TRUE	TRUE
KEFSPFGTITSANVMMEGGR	R	R	FALSE	FALSE	S	20	1	20	3	7	0	15M(15.9949)	Q9H361	Q9H361	1A		sp|Q9H361|ENSG00000151846.8|PABPC3|ENST00000281589.4|127260-HCT-15_RARE_RNA-K324N,127260-HCT-15_RARE_RNA-A313E|313e324n|;sp|P11940-1|ENSG00000070756.15|PABPC1|ENST00000318607.9|87770-HCT-15_RARE_EXOME-K324N|324n|	PABPC3_p.K324N,A313E;PABPC1_p.K324N	324,313;324	HCT-15	CAM	TRUE	FALSE	TRUE	TRUE
KFAEAFEDIPR	K	R	FALSE	FALSE	A	11	21	31	2, 3	4	0	NA	P50990	P50990	1A		sp|P50990-1|ENSG00000156261.12|CCT8|ENST00000286788.8|191141-HCT-15_RARE_RNA-A447D-and-191141-HCT-15_RARE_EXOME-A447D|447d|	CCT8_p.A447D	447	HCT-15	CAM	TRUE	FALSE	TRUE	TRUE
KFDDAVVQSDMK	R	K	FALSE	FALSE	H	12	8	19	2, 3	27	0	11M(15.9949)	P11142	P11142	1A		sp|P11142-1|ENSG00000109971.13|HSPA8|ENST00000532636.5|115059-HCT-15_RARE_RNA-R77K-and-115059-HCT-15_RARE_EXOME-R77K|77k|	HSPA8_p.R77K	77	HCT-15	CAM	TRUE	FALSE	TRUE	TRUE
KFDVNASAVQVLIEHIGNLDR	R	R	FALSE	FALSE	A	21	30	50	3, 4	3	0	NA	Q00610	Q00610	1A		sp|Q00610-1|ENSG00000141367.11|CLTC|ENST00000269122.7|160025-HCT-15_RARE_RNA-T1079A-and-160025-HCT-15_RARE_EXOME-T1079A|1079a|	CLTC_p.T1079A	1079	HCT-15	CAM	TRUE	FALSE	TRUE	TRUE
KFFGSLPDSWAR	R	R	FALSE	FALSE	G	12	10	21	3	1	0	NA	Q9BUP3	Q9BUP3	1A		sp|Q9BUP3-1|ENSG00000109854.13|HTATIP2|ENST00000421577.6|104095-HCT-15_SNP_RNA-S197R-and-104095-HCT-15_SNP_EXOME-S197R|197r|	HTATIP2_p.S197R	197	HCT-15	CAM	FALSE	TRUE	TRUE	TRUE
KGGSYSQAASSDSAQGSDVSLTAC	R	C	FALSE	TRUE	K	24	1	24	3	3	0	24C(56.0374)	P04439	P04439	1A	363	sp|P04439|ENSG00000206503.12|HLA-A|ENST00000396634.5|63676-HCT-15_SNP_EXOME-T345S|345s|	HLA-A_p.T345S	345	HCT-15	CAM	FALSE	TRUE	FALSE	TRUE
KHTLSFVDVGTGK	R	K	FALSE	FALSE	V	13	1	13	3	2	0	NA	P31040	P31040	1A		sp|P31040-1|ENSG00000073578.16|SDHA|ENST00000264932.10|53319-HCT-15_RARE_RNA-Y629F-and-53319-HCT-15_RARE_EXOME-Y629F|629f|	SDHA_p.Y629F	629	HCT-15	CAM	TRUE	FALSE	TRUE	TRUE
KIDAAQNWFADPNGGPEGEEQIR	K	R	FALSE	FALSE	G	23	8	30	3	5	0	NA	P18206	P18206	1A		sp|P18206-1|ENSG00000035403.17|VCL|ENST00000211998.9|97891-HCT-15_RARE_EXOME-L395F|395f|	VCL_p.L395F	395	HCT-15	CAM	TRUE	FALSE	FALSE	TRUE
KLGGTTDDCELVEGLVLTQK	K	K	FALSE	FALSE	V	20	6	25	3	1	0	9C(56.0374)	P50991	P50991	1A	221	sp|P50991-1|ENSG00000115484.14|CCT4|ENST00000394440.7|27519-HCT-15_RARE_EXOME-I218T|218t|	CCT4_p.I218T	218	HCT-15	CAM	TRUE	FALSE	FALSE	TRUE
KNDKEAAGEGPALYEDPPDHK	K	K	FALSE	FALSE	T	21	3	23	4	1	0	NA	P27695	P27695	1A		sp|P27695|ENSG00000100823.11|APEX1|ENST00000555414.5|130585-HCT-15_SNP_RNA-Q51H-and-130585-HCT-15_SNP_EXOME-Q51H|51h|	APEX1_p.Q51H	51	HCT-15	CAM	FALSE	TRUE	TRUE	TRUE
KPEDVLDDDGAGSAPLK	R	K	FALSE	FALSE	S	17	33	49	3	3	0	NA	P35613	P35613	1A		sp|P35613-1|ENSG00000172270.19|BSG|ENST00000333511.8|172215-HCT-15_RARE_EXOME-D359G|359g|	BSG_p.D359G	359	HCT-15	CAM	TRUE	FALSE	FALSE	TRUE
KSEDGTPAEDGTPAATGGSQPPSLGR	R	R	FALSE	FALSE	K	26	1	26	3	1	0	NA	Q9BQG0	Q9BQG0	1A		sp|Q9BQG0-1|ENSG00000132382.14|MYBBP1A|ENST00000254718.8|162299-HCT-15_SNP_RNA-M1208L-and-162299-HCT-15_SNP_EXOME-M1208L|1208l|	MYBBP1A_p.M1208L	1208	HCT-15	CAM	FALSE	TRUE	TRUE	TRUE
KSQIFSIASDNQPTVTIK	K	K	FALSE	FALSE	V	18	10	27	3	4	0	NA	P11021	P11021	1A		sp|P11021|ENSG00000044574.7|HSPA5|ENST00000324460.6|95250-HCT-15_RARE_RNA-T453I-and-95250-HCT-15_RARE_EXOME-T453I|453i|	HSPA5_p.T453I	453	HCT-15	CAM	TRUE	FALSE	TRUE	TRUE
KYTLPPGVDPAQVSSSLSPEGTLTVEAPMPK	R	K	FALSE	FALSE	L	31	7	37	3	29	0	29M(15.9949)	P04792	P04792	1A		sp|P04792|ENSG00000106211.8|HSPB1|ENST00000248553.6|73783-HCT-15_RARE_RNA-T151A-and-73783-HCT-15_RARE_EXOME-T151A|151a|	HSPB1_p.T151A	151	HCT-15	CAM	TRUE	FALSE	TRUE	TRUE
LAAETGEGEGEPLSR	R	R	FALSE	FALSE	L	15	1	15	2	1	0	NA	Q9BTC0	Q9BTC0	1A		sp|Q9BTC0-4|ENSG00000101191.16|DIDO1|ENST00000266070.8|189366-HCT-15_SNP_RNA-T1568A-and-189366-HCT-15_SNP_EXOME-T1568A|1568a|	DIDO1_p.T1568A	1568	HCT-15	CAM	FALSE	TRUE	TRUE	TRUE
LAALALASSENSSSTPEECEETSEKPK	R	K	FALSE	FALSE	K	27	1	27	4	3	0	19C(56.0374)	O00567	O00567	1A	472	sp|O00567|ENSG00000101361.16|NOP56|ENST00000329276.9|185156-HCT-15_SNP_RNA-M475T-and-185156-HCT-15_SNP_EXOME-M475T|475t|	NOP56_p.M475T	475	HCT-15	CAM	FALSE	TRUE	TRUE	TRUE
LADDVDLEQVSNETHGHVGADLAALCSEAALQAIR	K	R	FALSE	FALSE	K	35	6	40	4, 5	11	0	26C(56.0374)	P55072	P55072	1A	415	sp|P55072|ENSG00000165280.15|VCP|ENST00000358901.10|93504-HCT-15_RARE_EXOME-A400S|400s|	VCP_p.A400S	400	HCT-15	CAM	TRUE	FALSE	FALSE	TRUE
LADDVDLEQVSNETHGHVGADLAALCSEAALQAIRK	K	K	FALSE	FALSE	K	36	6	41	6	2	0	26C(56.0374)	P55072	P55072	1A	415	sp|P55072|ENSG00000165280.15|VCP|ENST00000358901.10|93504-HCT-15_RARE_EXOME-A400S|400s|	VCP_p.A400S	400	HCT-15	CAM	TRUE	FALSE	FALSE	TRUE
LAEENPDLQEAYVAK	K	K	FALSE	FALSE	Q	15	15	29	2	1	0	NA	Q8TB36	Q8TB36	1A		sp|Q8TB36-1|ENSG00000104381.12|GDAP1|ENST00000220822.11|83519-HCT-15_RARE_RNA-I186V-and-83519-HCT-15_RARE_EXOME-I186V|186v|	GDAP1_p.I186V	186	HCT-15	CAM	TRUE	FALSE	TRUE	TRUE
LCFVALDFEQEMAIAASSSSLEK	K	K	FALSE	FALSE	S	23	1	23	3	1	0	12M(15.9949), 2C(56.0374)	P0CG38	P0CG38	1A	917	sp|P0CG38|ENSG00000196834.11|POTEI|ENST00000451531.6|29623-HCT-15_SNP_EXOME-M929I,29623-HCT-15_SNP_EXOME-Y918F|918f929i|	POTEI_p.M929I,Y918F	929918	HCT-15	CAM	FALSE	TRUE	FALSE	TRUE
LCFVALDFEQEMAMAASSSSLEK	K	K	FALSE	FALSE	S	23	1	23	2, 3	5	0	12M(15.9949), 2C(56.0374)	P0CG38	P0CG38	1A	917	sp|P0CG38|ENSG00000196834.11|POTEI|ENST00000451531.6|29623-HCT-15_SNP_EXOME-Y918F|918f|	POTEI_p.Y918F	918	HCT-15	CAM	FALSE	TRUE	FALSE	TRUE
LCYVALDFDQEMAMVASSSSLEK	K	K	FALSE	FALSE	S	23	1	23	2	1	0	12M(15.9949), 2C(56.0374)	P0CG39	P0CG39	1A	880	sp|P0CG39|ENSG00000222038.3|POTEJ|ENST00000409602.1|21958-HCT-15_RARE_EXOME-E887D|887d|	POTEJ_p.E887D	887	HCT-15	CAM	TRUE	FALSE	FALSE	TRUE
LCYVALDFDQEMATVASSSSLEK	K	K	FALSE	FALSE	S	23	1	23	3	1	0	2C(56.0374)	P0CG39	P0CG39	1A	880	sp|P0CG39|ENSG00000222038.3|POTEJ|ENST00000409602.1|21958-HCT-15_RARE_EXOME-E887D,21958-HCT-15_SNP_EXOME-M892T|887d892t|	POTEJ_p.E887D,M892T	887892	HCT-15	CAM	TRUE	TRUE	FALSE	TRUE
LCYVALDFEQEMAIAASSSSLEK	K	K	FALSE	FALSE	S	23	1	23	3	3	0	2C(56.0374)	P0CG38	P0CG38	1A	917	sp|P0CG38|ENSG00000196834.11|POTEI|ENST00000451531.6|29623-HCT-15_SNP_EXOME-M929I|929i|	POTEI_p.M929I	929	HCT-15	CAM	FALSE	TRUE	FALSE	TRUE
LDTGPQSMSGK	R	K	FALSE	FALSE	S	11	1	11	2	4	0	8M(15.9949)	P35269	P35269	1A		sp|P35269|ENSG00000125651.13|GTF2F1|ENST00000394456.9|179589-HCT-15_RARE_RNA-L432M-and-179589-HCT-15_RARE_EXOME-L432M|432m|	GTF2F1_p.L432M	432	HCT-15	CAM	TRUE	FALSE	TRUE	TRUE
LEAVSHTSDMHSGYADSPSK	R	K	FALSE	FALSE	A	20	1	20	2, 3, 4	16	0	10M(15.9949)	Q01518	Q01518	1A		sp|Q01518-1|ENSG00000131236.16|CAP1|ENST00000372797.7|2315-HCT-15_RARE_RNA-R29S-and-2315-HCT-15_RARE_EXOME-R29S|29s|	CAP1_p.R29S	29	HCT-15	CAM	TRUE	FALSE	TRUE	TRUE
LEEALMADMMAHVEELAR	R	R	FALSE	FALSE	D	18	15	32	3	2	0	NA	O95983	O95983	1A		sp|O95983-1|ENSG00000071655.17|MBD3|ENST00000434436.7|178978-HCT-15_RARE_RNA-L248M-and-178978-HCT-15_RARE_EXOME-L248M|248m|	MBD3_p.L248M	248	HCT-15	CAM	TRUE	FALSE	TRUE	TRUE
LEGILEGLGLR	R	R	FALSE	FALSE	E	11	13	23	2	2	0	NA	Q9BSH5	Q9BSH5	1A		sp|Q9BSH5|ENSG00000119431.9|HDHD3|ENST00000238379.9|94947-HCT-15_SNP_RNA-G146E-and-94947-HCT-15_SNP_EXOME-G146E|146e|	HDHD3_p.G146E	146	HCT-15	CAM	FALSE	TRUE	TRUE	TRUE
LFDFQGLQHQVAHVSTQLEAAR	R	R	FALSE	FALSE	L	22	9	30	3, 4	2	0	NA	P45954	P45954	1A		sp|P45954-1|ENSG00000196177.12|ACADSB|ENST00000358776.6|99302-HCT-15_RARE_RNA-A340S-and-99302-HCT-15_RARE_EXOME-A340S|340s|	ACADSB_p.A340S	340	HCT-15	CAM	TRUE	FALSE	TRUE	TRUE
LFGTSPATEAAPPPPEPVPAAQGPATVQSVEDFVPDDRLDR	R	R	FALSE	FALSE	S	41	9	49	3	2	0	NA	Q3YEC7	Q3YEC7	1A		sp|Q3YEC7-1|ENSG00000196642.18|RABL6|ENST00000311502.11|92549-HCT-15_SNP_RNA-E382Q-and-92549-HCT-15_SNP_EXOME-E382Q|382q|	RABL6_p.E382Q	382	HCT-15	CAM	FALSE	TRUE	TRUE	TRUE
LFHECCPHSTDR	K	R	FALSE	FALSE	V	12	11	22	4	1	0	5C(56.0374), 6C(56.0374)	P61978	P61978	1A	184185	sp|P61978|ENSG00000165119.20|HNRNPK|ENST00000351839.7|94211-HCT-15_RARE_RNA-Q182H-and-94211-HCT-15_RARE_EXOME-Q182H|182h|	HNRNPK_p.Q182H	182	HCT-15	CAM	TRUE	FALSE	TRUE	TRUE
LGGTTDDCELVEGLVLTQK	K	K	FALSE	FALSE	V	19	7	25	3	5	0	8C(56.0374)	P50991	P50991	1A	221	sp|P50991-1|ENSG00000115484.14|CCT4|ENST00000394440.7|27519-HCT-15_RARE_EXOME-I218T|218t|	CCT4_p.I218T	218	HCT-15	CAM	TRUE	FALSE	FALSE	TRUE
LGITPEGQSYLDQFR	K	R	FALSE	FALSE	Q	15	7	21	2	2	0	NA	Q2M389	Q2M389	1A		sp|Q2M389-1|ENSG00000136051.14|WASHC4|ENST00000332180.9|119892-HCT-15_SNP_RNA-V901I-and-119892-HCT-15_SNP_EXOME-V901I|901i|	WASHC4_p.V901I	901	HCT-15	CAM	FALSE	TRUE	TRUE	TRUE
LGPGGLDPVEVYESLHEELQK	R	K	FALSE	FALSE	C	21	13	33	2, 3	8	0	NA	Q16543	Q16543	1A		sp|Q16543|ENSG00000105401.8|CDC37|ENST00000222005.6|180096-HCT-15_RARE_EXOME-P302H|302h|	CDC37_p.P302H	302	HCT-15	CAM	TRUE	FALSE	FALSE	TRUE
LHVTLYDCSFGR	K	R	FALSE	FALSE	S	12	1	12	3	1	0	8C(56.0374)	O15031	O15031	1A	760	sp|O15031|ENSG00000196576.14|PLXNB2|ENST00000359337.8|196445-HCT-15_SNP_RNA-N759D-and-196445-HCT-15_SNP_EXOME-N759D|759d|	PLXNB2_p.N759D	759	HCT-15	CAM	FALSE	TRUE	TRUE	TRUE
LIDIPDPVPALDLGQQLQLK	R	K	FALSE	FALSE	V	20	15	34	2	2	0	NA	Q13948	Q13948	1A		sp|Q13948-1|ENSG00000257923.10|CUX1|ENST00000292538.9|74767-HCT-15_RARE_EXOME-V99I|99i|;sp|P39880-1|ENSG00000257923.10|CUX1|ENST00000546411.7|74775-HCT-15_RARE_EXOME-V88I|88i|	CUX1_p.V99I;CUX1_p.V88I	99;88	HCT-15	CAM	TRUE	FALSE	FALSE	TRUE
LLDTVDDMLANDIVR	K	R	FALSE	FALSE	L	15	5	19	2	5	0	NA	Q9H4M9	Q9H4M9	1A		sp|Q9H4M9|ENSG00000110047.17|EHD1|ENST00000320631.7|112450-HCT-15_RARE_RNA-A391V-and-112450-HCT-15_RARE_EXOME-A391V|391v|	EHD1_p.A391V	391	HCT-15	CAM	TRUE	FALSE	TRUE	TRUE
LLLPGELANHAVSEGTK	R	K	FALSE	FALSE	A	17	10	26	2, 3	18	0	NA	Q99880	Q99880	1A		sp|Q99880|ENSG00000185130.5|HIST1H2BL|ENST00000377401.3|67796-HCT-15_RARE_RNA-K109N-and-67796-HCT-15_RARE_EXOME-K109N|109n|	HIST1H2BL_p.K109N	109	HCT-15	CAM	TRUE	FALSE	TRUE	TRUE
LLPHGLAVYASPENK	R	K	FALSE	FALSE	K	15	1	15	3	1	0	NA	Q9BYD2	Q9BYD2	1A		sp|Q9BYD2|ENSG00000143436.10|MRPL9|ENST00000368830.7|14679-HCT-15_RARE_RNA-Q126H-and-14679-HCT-15_RARE_EXOME-Q126H|126h|	MRPL9_p.Q126H	126	HCT-15	CAM	TRUE	FALSE	TRUE	TRUE
LLQAQAAGVDWR	R	R	FALSE	FALSE	E	12	1	12	2	2	0	NA	Q5SY16	Q5SY16	1A		sp|Q5SY16|ENSG00000162408.10|NOL9|ENST00000377705.5|9966-HCT-15_SNP_EXOME-S58A|58a|	NOL9_p.S58A	58	HCT-15	CAM	FALSE	TRUE	FALSE	TRUE
LLSDLLPPSTGTFQEAQSR	R	R	FALSE	FALSE	L	19	11	29	2	13	0	NA	Q9Y490	Q9Y490	1A		sp|Q9Y490|ENSG00000137076.20|TLN1|ENST00000314888.9|93585-HCT-15_SNP_EXOME-S1227L|1227l|	TLN1_p.S1227L	1227	HCT-15	CAM	FALSE	TRUE	FALSE	TRUE
LNATEEMLQQELLSR	K	R	FALSE	FALSE	T	15	5	19	2	2	0	NA	Q86W92	Q86W92	1A		sp|Q86W92-1|ENSG00000110841.13|PPFIBP1|ENST00000318304.12|116846-HCT-15_SNP_RNA-V148L-and-116846-HCT-15_SNP_EXOME-V148L|148l|	PPFIBP1_p.V148L	148	HCT-15	CAM	FALSE	TRUE	TRUE	TRUE
LNLPINIIGLAPLCENIPSGK	K	K	FALSE	FALSE	A	21	21	41	3	2	0	14C(56.0374)	P28838	P28838	1A	335	sp|P28838-1|ENSG00000002549.12|LAP3|ENST00000226299.8|45960-HCT-15_RARE_RNA-M338I-and-45960-HCT-15_RARE_EXOME-M338I|338i|	LAP3_p.M338I	338	HCT-15	CAM	TRUE	FALSE	TRUE	TRUE
LPGELANHAVSEGTK	L	K	FALSE	FALSE	A	15	12	26	3	1	0	NA	Q99880	Q99880	1A		sp|Q99880|ENSG00000185130.5|HIST1H2BL|ENST00000377401.3|67796-HCT-15_RARE_RNA-K109N-and-67796-HCT-15_RARE_EXOME-K109N|109n|	HIST1H2BL_p.K109N	109	HCT-15	CAM	TRUE	FALSE	TRUE	TRUE
LQAAYAGDKANDIQKR	R	R	FALSE	FALSE	E	16	3	18	3, 4	5	0	NA	Q01082	Q01082	1A		sp|Q01082-1|ENSG00000115306.15|SPTBN1|ENST00000356805.8|19558-HCT-15_RARE_RNA-D1880N-and-19558-HCT-15_RARE_EXOME-D1880N|1880n|	SPTBN1_p.D1880N	1880	HCT-15	CAM	TRUE	FALSE	TRUE	TRUE
LQDDFENR	K	R	FALSE	FALSE	T	8	9	16	2	1	0	NA	P78344	P78344	1A		sp|P78344-1|ENSG00000110321.16|EIF4G2|ENST00000526148.5|110297-HCT-15_SNP_RNA-E174D-and-110297-HCT-15_SNP_EXOME-E174D|174d|	EIF4G2_p.E174D	174	HCT-15	CAM	FALSE	TRUE	TRUE	TRUE
LQELTPSSGDPGEHDPASTHK	R	K	FALSE	FALSE	S	21	8	28	3, 4	8	0	NA	Q14258	Q14258	1A		sp|Q14258|ENSG00000121060.16|TRIM25|ENST00000316881.8|166246-HCT-15_SNP_RNA-P358L-and-166246-HCT-15_SNP_EXOME-P358L|358l|	TRIM25_p.P358L	358	HCT-15	CAM	FALSE	TRUE	TRUE	TRUE
LQQEANLLQLK	K	K	FALSE	FALSE	S	11	1	11	2	4	0	NA	Q15149	Q15149	1A		sp|Q15149-1|ENSG00000178209.14|PLEC|ENST00000322810.8|89058-HCT-15_RARE_RNA-K2604N-and-89058-HCT-15_RARE_EXOME-K2604N|2604n|	PLEC_p.K2604N	2604	HCT-15	CAM	TRUE	FALSE	TRUE	TRUE
LQQLPADFGHLVNLQHLDLLNNK	K	K	FALSE	FALSE	L	23	1	23	3, 4	5	0	NA	Q96AG4	Q96AG4	1A		sp|Q96AG4|ENSG00000108829.9|LRRC59|ENST00000225972.7|166134-HCT-15_RARE_RNA-R83H-and-166134-HCT-15_RARE_EXOME-R83H|83h|	LRRC59_p.R83H	83	HCT-15	CAM	TRUE	FALSE	TRUE	TRUE
LQQQHSEQPPLQPSPVTTR	R	R	FALSE	FALSE	R	19	1	19	3	1	0	NA	Q5JTV8	Q5JTV8	1A		sp|Q5JTV8-1|ENSG00000143337.18|TOR1AIP1|ENST00000606911.6|7196-HCT-15_SNP_RNA-M146T-and-7196-HCT-15_SNP_EXOME-M146T|146t|	TOR1AIP1_p.M146T	146	HCT-15	CAM	FALSE	TRUE	TRUE	TRUE
LSPYALAFMPPGYEEDMK	K	K	FALSE	FALSE	L	18	8	25	2	3	0	NA	Q9BXJ9	Q9BXJ9	1A		sp|Q9BXJ9-1|ENSG00000164134.12|NAA15|ENST00000296543.9|48202-HCT-15_RARE_RNA-F832S-and-48202-HCT-15_RARE_EXOME-F832S|832s|	NAA15_p.F832S	832	HCT-15	CAM	TRUE	FALSE	TRUE	TRUE
LSVTWPEGDELLPNEIRPAGTPIGALR	R	R	FALSE	FALSE	L	27	7	33	3	3	0	NA	A6NHR9	A6NHR9	1A		sp|A6NHR9-1|ENSG00000101596.15|SMCHD1|ENST00000320876.10|168508-HCT-15_SNP_RNA-V708I-and-168508-HCT-15_SNP_EXOME-V708I|708i|	SMCHD1_p.V708I	708	HCT-15	CAM	FALSE	TRUE	TRUE	TRUE
LTQAQIFDYSEIPNFPR	K	R	FALSE	FALSE	S	17	20	36	2	10	0	NA	P00491	P00491	1A		sp|P00491|ENSG00000198805.11|PNP|ENST00000361505.9|130606-HCT-15_SNP_RNA-G51S-and-130606-HCT-15_SNP_EXOME-G51S|51s|	PNP_p.G51S	51	HCT-15	CAM	FALSE	TRUE	TRUE	TRUE
LVDYLEWIR	R	R	FALSE	FALSE	K	9	1	9	2	1	0	NA	Q96BR5	Q96BR5	1A		sp|Q96BR5|ENSG00000162377.5|COA7|ENST00000371538.4|12322-HCT-15_RARE_RNA-G46W-and-12322-HCT-15_RARE_EXOME-G46W|46w|	COA7_p.G46W	46	HCT-15	CAM	TRUE	FALSE	TRUE	TRUE
LVGLEDPSVR	R	R	FALSE	FALSE	E	10	11	20	2	1	0	NA	Q8NBN7	Q8NBN7	1A		sp|Q8NBN7-1|ENSG00000160439.15|RDH13|ENST00000415061.7|184609-HCT-15_RARE_RNA-A321D-and-184609-HCT-15_RARE_EXOME-A321D|321d|	RDH13_p.A321D	321	HCT-15	CAM	TRUE	FALSE	TRUE	TRUE
LVVVGAGDVGK	K	K	FALSE	FALSE	S	11	6	16	2	2	0	NA	P01116	P01116	1A		sp|P01116-1|ENSG00000133703.11|KRAS|ENST00000256078.8|122572-HCT-15_RARE_RNA-G13D-and-122572-HCT-15_RARE_EXOME-G13D|13d|	KRAS_p.G13D	13	HCT-15	CAM	TRUE	FALSE	TRUE	TRUE
MDLPGVSIADEGETGMFSLC	K	C	FALSE	TRUE	T	20	1	20	2	1	0	20C(56.0374)	Q8IY81	Q8IY81	1A	424	sp|Q8IY81|ENSG00000108592.16|FTSJ3|ENST00000427159.6|166701-HCT-15_SNP_RNA-S424C-and-166701-HCT-15_SNP_EXOME-S424C|424c|	FTSJ3_p.S424C	424	HCT-15	CAM	FALSE	TRUE	TRUE	TRUE
MDQCFNQMEK	R	K	FALSE	FALSE	L	10	1	10	2, 3	3	0	4C(56.0374)	Q04637	Q04637	1A	958	sp|Q04637-1|ENSG00000114867.20|EIF4G1|ENST00000346169.6|38371-HCT-15_SNP_RNA-Y958C-and-38371-HCT-15_SNP_EXOME-Y958C|958c|	EIF4G1_p.Y958C	958	HCT-15	CAM	FALSE	TRUE	TRUE	TRUE
MFGCDLGPDGR	R	R	FALSE	FALSE	L	11	1	11	3	1	0	4C(56.0374)	P10321	P10321	1A	125	sp|P10321|ENSG00000204525.16|HLA-C|ENST00000376228.9|68111-HCT-15_RARE_RNA-S123F-and-68111-HCT-15_RARE_EXOME-S123F|123f|	HLA-C_p.S123F	123	HCT-15	CAM	TRUE	FALSE	TRUE	TRUE
MFVLDDADEMLSR	K	R	FALSE	FALSE	G	13	6	18	2	1	0	NA	P60842	P60842	1A		sp|P60842-1|ENSG00000161960.14|EIF4A1|ENST00000293831.12|156370-HCT-15_RARE_RNA-E183D-and-156370-HCT-15_RARE_EXOME-E183D|183d|	EIF4A1_p.E183D	183	HCT-15	CAM	TRUE	FALSE	TRUE	TRUE
NAINTEMYHEIMHALK	K	K	FALSE	FALSE	A	16	7	22	3	3	0	NA	O75521	O75521	1A		sp|O75521-1|ENSG00000198721.12|ECI2|ENST00000380118.7|67283-HCT-15_RARE_RNA-R174H-and-67283-HCT-15_RARE_EXOME-R174H|174h|	ECI2_p.R174H	174	HCT-15	CAM	TRUE	FALSE	TRUE	TRUE
NFGAENPDPFVPVLSTAVK	K	K	FALSE	FALSE	L	19	1	19	2	1	0	NA	Q9H583	Q9H583	1A		sp|Q9H583|ENSG00000119285.10|HEATR1|ENST00000366582.7|17722-HCT-15_SNP_RNA-N1694S-and-17722-HCT-15_SNP_EXOME-N1694S|1694s|	HEATR1_p.N1694S	1694	HCT-15	CAM	FALSE	TRUE	TRUE	TRUE
NGQGDAPPTPPPTPVDLELEWVLGK	R	K	FALSE	FALSE	M	25	9	33	2	1	0	NA	O15067	O15067	1A		sp|O15067|ENSG00000178921.13|PFAS|ENST00000314666.10|156540-HCT-15_SNP_RNA-L621P-and-156540-HCT-15_SNP_EXOME-L621P|621p|	PFAS_p.L621P	621	HCT-15	CAM	FALSE	TRUE	TRUE	TRUE
NIAAFLKK	Q	K	FALSE	FALSE	N	8	1	8	2	1	0	NA	Q8TD57	Q8TD57	1A		sp|Q8TD57-1|ENSG00000158486.13|DNAH3|ENST00000261383.3|152663-HCT-15_SNP_EXOME-E631K|631k|	DNAH3_p.E631K	631	HCT-15	CAM	FALSE	TRUE	FALSE	TRUE
NIGVIVVGFPATPIIESR	R	R	FALSE	FALSE	A	18	8	25	2	1	0	NA	O15270	O15270	1A		sp|O15270|ENSG00000100596.6|SPTLC2|ENST00000216484.6|136873-HCT-15_RARE_RNA-V494I-and-136873-HCT-15_RARE_EXOME-V494I|494i|	SPTLC2_p.V494I	494	HCT-15	CAM	TRUE	FALSE	TRUE	TRUE
NKLQQLPADFGHLVNLQHLDLLNNK	K	K	FALSE	FALSE	L	25	1	25	4	1	0	NA	Q96AG4	Q96AG4	1A		sp|Q96AG4|ENSG00000108829.9|LRRC59|ENST00000225972.7|166134-HCT-15_RARE_RNA-R83H-and-166134-HCT-15_RARE_EXOME-R83H|83h|	LRRC59_p.R83H	83	HCT-15	CAM	TRUE	FALSE	TRUE	TRUE
NLAETQPELGTWGDGK	K	K	FALSE	FALSE	G	16	6	21	3	1	0	NA	Q9P2W9	Q9P2W9	1A		sp|Q9P2W9|ENSG00000168818.9|STX18|ENST00000306200.6|49498-HCT-15_RARE_EXOME-I207N|207n|	STX18_p.I207N	207	HCT-15	CAM	TRUE	FALSE	FALSE	TRUE
NLGDVGEKETETEVLLLEHNVPHQPFSQAVLSFLPK	R	K	FALSE	FALSE	M	36	1	36	4	2	0	NA	Q9Y2L1	Q9Y2L1	1A		sp|Q9Y2L1-1|ENSG00000083520.14|DIS3|ENST00000377767.8|129938-HCT-15_SNP_RNA-D438N-and-129938-HCT-15_SNP_EXOME-D438N|438n|	DIS3_p.D438N	438	HCT-15	CAM	FALSE	TRUE	TRUE	TRUE
NLHQSGFSLSDAQIDDNIPR	R	R	FALSE	FALSE	R	20	10	29	3	2	0	NA	Q16555	Q16555	1A		sp|Q16555-1|ENSG00000092964.17|DPYSL2|ENST00000311151.9|82262-HCT-15_RARE_EXOME-G543D|543d|	DPYSL2_p.G543D	543	HCT-15	CAM	TRUE	FALSE	FALSE	TRUE
NPLLDLAAYDQEGR	R	R	FALSE	FALSE	R	14	1	14	2	1	0	NA	Q8TEM1	Q8TEM1	1A		sp|Q8TEM1-1|ENSG00000132182.11|NUP210|ENST00000254508.6|39494-HCT-15_SNP_RNA-R786L-and-39494-HCT-15_SNP_EXOME-R786L|786l|	NUP210_p.R786L	786	HCT-15	CAM	FALSE	TRUE	TRUE	TRUE
NPYALLDEDEC	R	C	FALSE	TRUE	-	11	27	37	2	1	0	11C(56.0374)	P36915	P36915	1A	607	sp|P36915-1|ENSG00000204590.12|GNL1|ENST00000376621.7|67995-HCT-15_RARE_RNA-G603D-and-67995-HCT-15_RARE_EXOME-G603D|603d|	GNL1_p.G603D	603	HCT-15	CAM	TRUE	FALSE	TRUE	TRUE
NSLEFFTMLAQR	R	R	FALSE	FALSE	R	12	10	21	2	1	0	NA	Q9BVP2	Q9BVP2	1A		sp|Q9BVP2-1|ENSG00000163938.16|GNL3|ENST00000418458.5|35128-HCT-15_SNP_RNA-V367M-and-35128-HCT-15_SNP_EXOME-V367M|367m|	GNL3_p.V367M	367	HCT-15	CAM	FALSE	TRUE	TRUE	TRUE
NTNSVPETAPAAIPETR	R	R	FALSE	FALSE	R	17	1	17	2	1	0	NA	P55265	P55265	1A		sp|P55265-1|ENSG00000160710.15|ADAR|ENST00000368474.8|14941-HCT-15_SNP_RNA-K384R-and-14941-HCT-15_SNP_EXOME-K384R|384r|	ADAR_p.K384R	384	HCT-15	CAM	FALSE	TRUE	TRUE	TRUE
NTVLATWQPYSTSK	K	K	FALSE	FALSE	D	14	12	25	2	5	0	NA	Q9BY44	Q9BY44	1A		sp|Q9BY44-1|ENSG00000144895.11|EIF2A|ENST00000460851.5|37365-HCT-15_SNP_EXOME-T97S|97s|	EIF2A_p.T97S	97	HCT-15	CAM	FALSE	TRUE	FALSE	TRUE
NVVYPLYQLGGPQLR	R	R	FALSE	FALSE	V	15	1	15	2	2	0	NA	Q16540	Q16540	1A		sp|Q16540|ENSG00000214026.10|MRPL23|ENST00000381519.5|103188-HCT-15_SNP_EXOME-R11Q|11q|	MRPL23_p.R11Q	11	HCT-15	CAM	FALSE	TRUE	FALSE	TRUE
PGELANHAVSEGTK	L	K	FALSE	FALSE	A	14	13	26	2, 3	5	0	NA	Q99880	Q99880	1A		sp|Q99880|ENSG00000185130.5|HIST1H2BL|ENST00000377401.3|67796-HCT-15_RARE_RNA-K109N-and-67796-HCT-15_RARE_EXOME-K109N|109n|	HIST1H2BL_p.K109N	109	HCT-15	CAM	TRUE	FALSE	TRUE	TRUE
PVIDKTLNEADCATIPPAIR	R	R	FALSE	FALSE	S	20	3	22	4	1	0	NA	P31040	P31040	1A	654	sp|P31040-1|ENSG00000073578.16|SDHA|ENST00000264932.10|53319-HCT-15_SNP_RNA-V657I-and-53319-HCT-15_SNP_EXOME-V657I|657i|	SDHA_p.V657I	657	HCT-15	CAM	FALSE	TRUE	TRUE	TRUE
PVLHFYVRPSGHEGAASGHTR	S	R	FALSE	FALSE	R	21	1	21	6	1	0	NA	O15067	O15067	1A		sp|O15067|ENSG00000178921.13|PFAS|ENST00000314666.10|156540-HCT-15_SNP_RNA-P19S-and-156540-HCT-15_SNP_EXOME-P19S|19s|	PFAS_p.P19S	19	HCT-15	CAM	FALSE	TRUE	TRUE	TRUE
PVYQVKPYHGGGAPLR	M	R	FALSE	FALSE	V	16	2	17	4	1	0	NA	Q13155	Q13155	1A		sp|Q13155|ENSG00000106305.9|AIMP2|ENST00000223029.7|71917-HCT-15_RARE_RNA-M3V-and-71917-HCT-15_RARE_EXOME-M3V|3v|	AIMP2_p.M3V	3	HCT-15	CAM	TRUE	FALSE	TRUE	TRUE
QAIDDDCNQTGQMTAGFLDWPQGTFASQVMLEGDKLK	K	K	FALSE	FALSE	V	37	11	47	4	1	0	7C(56.0374)	P38117	P38117	1A	131	sp|P38117-1|ENSG00000105379.9|ETFB|ENST00000309244.8|184092-HCT-15_SNP_RNA-T154M-and-184092-HCT-15_SNP_EXOME-T154M|154m|	ETFB_p.T154M	154	HCT-15	CAM	FALSE	TRUE	TRUE	TRUE
QLWGLLIEEAEKR	K	R	FALSE	FALSE	H	13	1	13	2, 3	4	0	NA	Q01082	Q01082	1A		sp|Q01082-1|ENSG00000115306.15|SPTBN1|ENST00000356805.8|19558-HCT-15_RARE_RNA-T1581A-and-19558-HCT-15_RARE_EXOME-T1581A|1581a|	SPTBN1_p.T1581A	1581	HCT-15	CAM	TRUE	FALSE	TRUE	TRUE
QQNGIVPIVEPEILPDGGHDLK	C	K	TRUE	FALSE	R	22	1	22	3	2	0	NA	P04075	P04075	1A		sp|P04075-1|ENSG00000149925.18|ALDOA|ENST00000569545.5|147948-HCT-15_RARE_RNA-D196G-and-147948-HCT-15_RARE_EXOME-D196G|196g|	ALDOA_p.D196G	196	HCT-15	CAM	TRUE	FALSE	TRUE	TRUE
QRAQEALLQLSQALSLMETVK	K	K	FALSE	FALSE	Q	21	1	21	3	1	0	NA	O60664	O60664	1A		sp|O60664-1|ENSG00000105355.8|PLIN3|ENST00000221957.8|179418-HCT-15_SNP_RNA-V275A-and-179418-HCT-15_SNP_EXOME-V275A|275a|	PLIN3_p.V275A	275	HCT-15	CAM	FALSE	TRUE	TRUE	TRUE
QSGGSSQAGAVTVSDVQELMR	R	R	FALSE	FALSE	R	21	8	28	2	1	0	NA	O00233	O00233	1A		sp|O00233-1|ENSG00000110801.13|PSMD9|ENST00000541212.5|120676-HCT-15_SNP_RNA-V17A-and-120676-HCT-15_SNP_EXOME-V17A|17a|	PSMD9_p.V17A	17	HCT-15	CAM	FALSE	TRUE	TRUE	TRUE
REPWLLPSQHNDIIQDALGQR	R	R	FALSE	FALSE	Y	21	12	32	3, 4	4	0	NA	Q14697	Q14697	1A		sp|Q14697-1|ENSG00000089597.16|GANAB|ENST00000356638.7|112080-HCT-15_SNP_RNA-R698Q-and-112080-HCT-15_SNP_EXOME-R698Q|698q|	GANAB_p.R698Q	698	HCT-15	CAM	FALSE	TRUE	TRUE	TRUE
RLAAETGEGEGEPLSR	R	R	FALSE	FALSE	L	16	1	16	3	1	0	NA	Q9BTC0	Q9BTC0	1A		sp|Q9BTC0-4|ENSG00000101191.16|DIDO1|ENST00000266070.8|189366-HCT-15_SNP_RNA-T1568A-and-189366-HCT-15_SNP_EXOME-T1568A|1568a|	DIDO1_p.T1568A	1568	HCT-15	CAM	FALSE	TRUE	TRUE	TRUE
RLGPGGLDPVEVYESLHEELQK	K	K	FALSE	FALSE	C	22	12	33	3	4	0	NA	Q16543	Q16543	1A		sp|Q16543|ENSG00000105401.8|CDC37|ENST00000222005.6|180096-HCT-15_RARE_EXOME-P302H|302h|	CDC37_p.P302H	302	HCT-15	CAM	TRUE	FALSE	FALSE	TRUE
SALFAQINQGESITHALK	R	K	FALSE	FALSE	H	18	1	18	2, 3	12	0	NA	Q01518	Q01518	1A		sp|Q01518-1|ENSG00000131236.16|CAP1|ENST00000372797.7|2315-HCT-15_RARE_RNA-S256A-and-2315-HCT-15_RARE_EXOME-S256A|256a|	CAP1_p.S256A	256	HCT-15	CAM	TRUE	FALSE	TRUE	TRUE
SALQSINEWAAQTTNGKLPEVTK	R	K	FALSE	FALSE	D	23	6	28	3	4	0	NA	P50454	P50454	1A		sp|P50454|ENSG00000149257.13|SERPINH1|ENST00000533603.5|107237-HCT-15_RARE_RNA-D182N-and-107237-HCT-15_RARE_EXOME-D182N|182n|	SERPINH1_p.D182N	182	HCT-15	CAM	TRUE	FALSE	TRUE	TRUE
SCDPSGSIDECNVETGR	C	R	TRUE	FALSE	C	17	1	17	3	1	0	11C(56.0374), 2C(56.0374)	P11047	P11047	1A	447456	sp|P11047|ENSG00000135862.5|LAMC1|ENST00000258341.4|7321-HCT-15_SNP_RNA-I458V-and-7321-HCT-15_SNP_EXOME-I458V|458v|	LAMC1_p.I458V	458	HCT-15	CAM	FALSE	TRUE	TRUE	TRUE
SDPLCILLQDVGGGSWAELGR	K	R	FALSE	FALSE	T	21	1	21	3	2	0	5C(56.0374)	Q99829	Q99829	1A	30	sp|Q99829|ENSG00000214078.12|CPNE1|ENST00000352393.8|188439-HCT-15_SNP_RNA-V31I-and-188439-HCT-15_SNP_EXOME-V31I|31i|	CPNE1_p.V31I	31	HCT-15	CAM	FALSE	TRUE	TRUE	TRUE
SEDGTPAEDGTPAATGGSQPPSLGR	K	R	FALSE	FALSE	K	25	1	25	2	2	0	NA	Q9BQG0	Q9BQG0	1A		sp|Q9BQG0-1|ENSG00000132382.14|MYBBP1A|ENST00000254718.8|162299-HCT-15_SNP_RNA-M1208L-and-162299-HCT-15_SNP_EXOME-M1208L|1208l|	MYBBP1A_p.M1208L	1208	HCT-15	CAM	FALSE	TRUE	TRUE	TRUE
SELPLDPLPLPTEEGNPLLK	K	K	FALSE	FALSE	H	20	13	32	2	5	0	NA	Q15758	Q15758	1A		sp|Q15758-1|ENSG00000105281.12|SLC1A5|ENST00000542575.6|183329-HCT-15_SNP_RNA-V512L-and-183329-HCT-15_SNP_EXOME-V512L|512l|	SLC1A5_p.V512L	512	HCT-15	CAM	FALSE	TRUE	TRUE	TRUE
SGGTLVLVGLGSEMTTVPLLHAAIR	R	R	FALSE	FALSE	E	25	25	49	3	1	0	NA	Q00796	Q00796	1A		sp|Q00796-1|ENSG00000140263.13|SORD|ENST00000267814.13|139296-HCT-15_RARE_RNA-N269T-and-139296-HCT-15_RARE_EXOME-N269T|269t|	SORD_p.N269T	269	HCT-15	CAM	TRUE	FALSE	TRUE	TRUE
SGHIQILLR	K	R	FALSE	FALSE	A	9	6	14	2	3	0	NA	Q9Y3A6	Q9Y3A6	1A		sp|Q9Y3A6-1|ENSG00000117500.12|TMED5|ENST00000370282.7|13293-HCT-15_SNP_RNA-T175I-and-13293-HCT-15_SNP_EXOME-T175I|175i|	TMED5_p.T175I	175	HCT-15	CAM	FALSE	TRUE	TRUE	TRUE
SGLLPSGPRPGYAAIQALLSSR	K	R	FALSE	FALSE	G	22	1	22	3	1	0	NA	P22570	P22570	1A		sp|P22570-1|ENSG00000161513.11|FDXR|ENST00000293195.9|167240-HCT-15_SNP_RNA-A427S-and-167240-HCT-15_SNP_EXOME-A427S|427s|	FDXR_p.A427S	427	HCT-15	CAM	FALSE	TRUE	TRUE	TRUE
SGTPQLSLPFAAR	K	R	FALSE	FALSE	L	13	1	13	2	2	0	NA	O00214	O00214	1A		sp|O00214-1|ENSG00000116977.18|LGALS8|ENST00000366584.8|9021-HCT-15_SNP_RNA-R184S-and-9021-HCT-15_SNP_EXOME-R184S|184s|	LGALS8_p.R184S	184	HCT-15	CAM	FALSE	TRUE	TRUE	TRUE
SIDPGLKEDTLEFLIK	R	K	FALSE	FALSE	V	16	1	16	3	3	0	NA	Q15021	Q15021	1A		sp|Q15021|ENSG00000010292.12|NCAPD2|ENST00000315579.9|115838-HCT-15_SNP_RNA-Q83E-and-115838-HCT-15_SNP_EXOME-Q83E|83e|	NCAPD2_p.Q83E	83	HCT-15	CAM	FALSE	TRUE	TRUE	TRUE
SILGLPLLPEDSIK	R	K	FALSE	FALSE	V	14	1	14	2	3	0	NA	Q5VSL9	Q5VSL9	1A		sp|Q5VSL9-1|ENSG00000143093.14|STRIP1|ENST00000369795.7|4699-HCT-15_RARE_RNA-P319L-and-4699-HCT-15_RARE_EXOME-P319L|319l|	STRIP1_p.P319L	319	HCT-15	CAM	TRUE	FALSE	TRUE	TRUE
SLGSLEGEAEAETSSPK	A	K	FALSE	FALSE	G	17	1	17	2	1	0	NA	Q09666	Q09666	1A		sp|Q09666-1|ENSG00000124942.13|AHNAK|ENST00000378024.8|112027-HCT-15_RARE_RNA-A5761T-and-112027-HCT-15_RARE_EXOME-A5761T|5761t|	AHNAK_p.A5761T	5761	HCT-15	CAM	TRUE	FALSE	TRUE	TRUE
SLHQFLLEPITCHAWNMDR	M	R	FALSE	FALSE	T	19	2	20	4	1	0	12C(56.0374), N-term(42.0106)	Q92747	Q92747	1A	13	sp|Q92747-1|ENSG00000241685.9|ARPC1A|ENST00000262942.9|74366-HCT-15_RARE_RNA-R18M-and-74366-HCT-15_RARE_EXOME-R18M|18m|	ARPC1A_p.R18M	18	HCT-15	CAM	TRUE	FALSE	TRUE	TRUE
SNYSFEKPFLWLAR	K	R	FALSE	FALSE	K	14	15	28	2, 3	3	0	NA	P62826	P62826	1A		sp|P62826|ENSG00000132341.11|RAN|ENST00000543796.5|121053-HCT-15_RARE_RNA-N156S-and-121053-HCT-15_RARE_EXOME-N156S|156s|	RAN_p.N156S	156	HCT-15	CAM	TRUE	FALSE	TRUE	TRUE
SPADPTDLGGQTSPR	R	R	FALSE	FALSE	R	15	1	15	2	1	0	NA	O60504	O60504	1A		sp|O60504-1|ENSG00000120896.13|SORBS3|ENST00000240123.11|82050-HCT-15_SNP_RNA-I556T-and-82050-HCT-15_SNP_EXOME-I556T|556t|	SORBS3_p.I556T	556	HCT-15	CAM	FALSE	TRUE	TRUE	TRUE
SPMVPLPMPK	R	K	FALSE	FALSE	K	10	9	18	2	2	0	3M(15.9949)	P43155	P43155	1A		sp|P43155-1|ENSG00000095321.16|CRAT|ENST00000318080.6|95526-HCT-15_SNP_RNA-L372M-and-95526-HCT-15_SNP_EXOME-L372M|372m|	CRAT_p.L372M	372	HCT-15	CAM	FALSE	TRUE	TRUE	TRUE
SPVLHFYVRPSGHEGAASGHTR	M	R	FALSE	FALSE	R	22	1	22	5	5	0	N-term(42.0106)	O15067	O15067	1A		sp|O15067|ENSG00000178921.13|PFAS|ENST00000314666.10|156540-HCT-15_SNP_RNA-P19S-and-156540-HCT-15_SNP_EXOME-P19S|19s|	PFAS_p.P19S	19	HCT-15	CAM	FALSE	TRUE	TRUE	TRUE
SQAQILLR	R	R	FALSE	FALSE	W	8	1	8	2	3	0	NA	P14550	P14550	1A		sp|P14550|ENSG00000117448.13|AKR1A1|ENST00000372070.7|2889-HCT-15_RARE_RNA-P245Q-and-2889-HCT-15_RARE_EXOME-P245Q|245q|	AKR1A1_p.P245Q	245	HCT-15	CAM	TRUE	FALSE	TRUE	TRUE
SQFLEEGIGGTIPHVSPER	K	R	FALSE	FALSE	V	19	8	26	3	1	0	NA	Q8NFT2	Q8NFT2	1A		sp|Q8NFT2-1|ENSG00000157214.13|STEAP2|ENST00000287908.7|74091-HCT-15_SNP_RNA-M475I-and-74091-HCT-15_SNP_EXOME-M475I|475i|	STEAP2_p.M475I	475	HCT-15	CAM	FALSE	TRUE	TRUE	TRUE
SQIFSIASDNQPTVTIK	K	K	FALSE	FALSE	V	17	11	27	2	12	0	NA	P11021	P11021	1A		sp|P11021|ENSG00000044574.7|HSPA5|ENST00000324460.6|95250-HCT-15_RARE_RNA-T453I-and-95250-HCT-15_RARE_EXOME-T453I|453i|	HSPA5_p.T453I	453	HCT-15	CAM	TRUE	FALSE	TRUE	TRUE
SQPAASTLESESVQR	K	R	FALSE	FALSE	V	15	1	15	2	1	0	NA	P46013	P46013	1A		sp|P46013-1|ENSG00000148773.13|MKI67|ENST00000368654.7|102701-HCT-15_SNP_RNA-K3217E-and-102701-HCT-15_SNP_EXOME-K3217E|3217e|	MKI67_p.K3217E	3217	HCT-15	CAM	FALSE	TRUE	TRUE	TRUE
SRELDECFAQANDQMETLDSLIR	R	R	FALSE	FALSE	E	23	1	23	4	3	0	7C(56.0374)	P15924	P15924	1A	110	sp|P15924-1|ENSG00000096696.13|DSP|ENST00000379802.7|62914-HCT-15_RARE_RNA-I120T-and-62914-HCT-15_RARE_EXOME-I120T|120t|	DSP_p.I120T	120	HCT-15	CAM	TRUE	FALSE	TRUE	TRUE
SRPITMFIPSDVDNYDDIR	R	R	FALSE	FALSE	T	19	1	19	3	1	0	NA	Q9HC35	Q9HC35	1A		sp|Q9HC35-1|ENSG00000143924.18|EML4|ENST00000318522.9|19273-HCT-15_RARE_RNA-G233S-and-19273-HCT-15_RARE_EXOME-G233S|233s|	EML4_p.G233S	233	HCT-15	CAM	TRUE	FALSE	TRUE	TRUE
SSSSSSQPEHIAMLVSTAASPSLIK	K	K	FALSE	FALSE	E	25	7	31	3	2	0	NA	P42166	P42166	1A		sp|P42166-1|ENSG00000120802.13|TMPO|ENST00000266732.8|119626-HCT-15_RARE_RNA-S301I-and-119626-HCT-15_RARE_EXOME-S301I|301i|	TMPO_p.S301I	301	HCT-15	CAM	TRUE	FALSE	TRUE	TRUE
SVFKPFIFGVGVAQAPQVLSPTFGAQDPVR	R	R	FALSE	FALSE	T	30	1	30	3	1	0	NA	Q96FV2	Q96FV2	1A		sp|Q96FV2-1|ENSG00000141295.13|SCRN2|ENST00000290216.13|165847-HCT-15_SNP_RNA-M323V-and-165847-HCT-15_SNP_EXOME-M323V|323v|	SCRN2_p.M323V	323	HCT-15	CAM	FALSE	TRUE	TRUE	TRUE
SVGGSGVGSFGDNLVTR	R	R	FALSE	FALSE	S	17	6	22	2	4	0	NA	P02545	P02545	1A		sp|P02545-1|ENSG00000160789.19|LMNA|ENST00000368300.8|6152-HCT-15_RARE_RNA-G634V-and-6152-HCT-15_RARE_EXOME-G634V|634v|	LMNA_p.G634V	634	HCT-15	CAM	TRUE	FALSE	TRUE	TRUE
SVVSDVPEELDFLVPK	K	K	FALSE	FALSE	A	16	15	30	2	2	0	NA	Q14966	Q14966	1A		sp|Q14966-1|ENSG00000075292.18|ZNF638|ENST00000264447.8|20090-HCT-15_SNP_RNA-A1912V-and-20090-HCT-15_SNP_EXOME-A1912V|1912v|	ZNF638_p.A1912V	1912	HCT-15	CAM	FALSE	TRUE	TRUE	TRUE
TATLQQAQEVHEK	K	K	FALSE	FALSE	L	13	18	30	2, 3	15	0	NA	P60174	P60174	1A		sp|P60174-3|ENSG00000111669.14|TPI1|ENST00000229270.8|115949-HCT-15_RARE_EXOME-P216L|216l|	TPI1_p.P216L	216	HCT-15	CAM	TRUE	FALSE	FALSE	TRUE
TATLQQAQEVHEKLR	K	R	FALSE	FALSE	G	15	18	32	3, 4	3	0	NA	P60174	P60174	1A		sp|P60174-3|ENSG00000111669.14|TPI1|ENST00000229270.8|115949-HCT-15_RARE_EXOME-P216L|216l|	TPI1_p.P216L	216	HCT-15	CAM	TRUE	FALSE	FALSE	TRUE
TDVPIYDGSWVEWYMR	K	R	FALSE	FALSE	A	16	1	16	2	3	0	NA	P25325	P25325	1A		sp|P25325-1|ENSG00000128309.16|MPST|ENST00000401419.7|193484-HCT-15_RARE_RNA-P267T-and-193484-HCT-15_RARE_EXOME-P267T|267t|	MPST_p.P267T	267	HCT-15	CAM	TRUE	FALSE	TRUE	TRUE
TGGSAQPETPYSGHGLLIDSLVLLPR	R	R	FALSE	FALSE	V	26	1	26	3	1	0	NA	P55268	P55268	1A		sp|P55268|ENSG00000172037.13|LAMB2|ENST00000418109.5|40862-HCT-15_RARE_RNA-P711H-and-40862-HCT-15_RARE_EXOME-P711H|711h|	LAMB2_p.P711H	711	HCT-15	CAM	TRUE	FALSE	TRUE	TRUE
TGSSAQEAASGVALGEAPDHSYESLR	L	R	FALSE	FALSE	V	26	19	44	3	1	0	NA	Q13011	Q13011	1A		sp|Q13011|ENSG00000104823.8|ECH1|ENST00000221418.8|182284-HCT-15_SNP_RNA-E41A-and-182284-HCT-15_SNP_EXOME-E41A|41a|	ECH1_p.E41A	41	HCT-15	CAM	FALSE	TRUE	TRUE	TRUE
THVTHHPVSDHEATLR	K	R	FALSE	FALSE	C	16	1	16	4	1	0	NA	P10321	P10321	1A		sp|P01889|ENSG00000234745.10|HLA-B|ENST00000412585.6|68124-HCT-15_SNP_RNA-I218V-and-68124-HCT-15_SNP_EXOME-I218V|218v|;sp|P10321|ENSG00000204525.16|HLA-C|ENST00000376228.9|68111-HCT-15_SNP_EXOME-L218V|218v|	HLA-B_p.I218V;HLA-C_p.L218V	218	HCT-15	CAM	FALSE	TRUE	TRUE	TRUE
TLDPFETMLK	K	K	FALSE	FALSE	S	10	1	10	2	1	0	NA	Q6UW02	Q6UW02	1A		sp|Q6UW02-1|ENSG00000119004.15|CYP20A1|ENST00000356079.8|23869-HCT-15_SNP_EXOME-S97L|97l|	CYP20A1_p.S97L	97	HCT-15	CAM	FALSE	TRUE	FALSE	TRUE
TLNEADCATIPPAIR	K	R	FALSE	FALSE	S	15	8	22	3	2	0	7C(56.0374)	P31040	P31040	1A	654	sp|P31040-1|ENSG00000073578.16|SDHA|ENST00000264932.10|53319-HCT-15_SNP_RNA-V657I-and-53319-HCT-15_SNP_EXOME-V657I|657i|	SDHA_p.V657I	657	HCT-15	CAM	FALSE	TRUE	TRUE	TRUE
TLQALEFHTVPFQLLTR	K	R	FALSE	FALSE	Y	17	32	48	2, 3	3	0	NA	Q08380	Q08380	1A		sp|Q08380|ENSG00000108679.12|LGALS3BP|ENST00000262776.7|167811-HCT-15_RARE_RNA-A392T-and-167811-HCT-15_RARE_EXOME-A392T|392t|	LGALS3BP_p.A392T	392	HCT-15	CAM	TRUE	FALSE	TRUE	TRUE
TLSYVEDQK	K	K	FALSE	FALSE	E	9	9	17	2	1	0	NA	Q5T4S7	Q5T4S7	1A		sp|Q5T4S7-1|ENSG00000127481.14|UBR4|ENST00000375254.7|10433-HCT-15_RARE_EXOME-D169Y|169y|	UBR4_p.D169Y	169	HCT-15	CAM	TRUE	FALSE	FALSE	TRUE
TMQGSEVVSVLK	K	K	FALSE	FALSE	S	12	1	12	2	3	0	2M(15.9949)	Q8WUM4	Q8WUM4	1A		sp|Q8WUM4-1|ENSG00000170248.13|PDCD6IP|ENST00000307296.7|33852-HCT-15_SNP_EXOME-N550S|550s|	PDCD6IP_p.N550S	550	HCT-15	CAM	FALSE	TRUE	FALSE	TRUE
TNFFIQLVRPSVAQPEDTVQFR	R	R	FALSE	FALSE	L	22	3	24	3	1	0	NA	Q16540	Q16540	1A		sp|Q16540|ENSG00000214026.10|MRPL23|ENST00000381519.5|103188-HCT-15_SNP_RNA-G32S-and-103188-HCT-15_SNP_EXOME-G32S|32s|	MRPL23_p.G32S	32	HCT-15	CAM	FALSE	TRUE	TRUE	TRUE
TNVFAPDFIAGVSPFVENDISSR	K	R	FALSE	FALSE	S	23	1	23	2	1	0	NA	Q9ULX3	Q9ULX3	1A		sp|Q9ULX3|ENSG00000141101.12|NOB1|ENST00000268802.9|154597-HCT-15_SNP_RNA-Y366F-and-154597-HCT-15_SNP_EXOME-Y366F|366f|	NOB1_p.Y366F	366	HCT-15	CAM	FALSE	TRUE	TRUE	TRUE
TPSETPGPSPAGPTR	E	R	FALSE	FALSE	D	15	1	15	2	1	0	NA	Q9NZT2	Q9NZT2	1A		sp|Q9NZT2-1|ENSG00000060491.16|OGFR|ENST00000290291.10|187195-HCT-15_SNP_EXOME-S577T|577t|	OGFR_p.S577T	577	HCT-15	CAM	FALSE	TRUE	FALSE	TRUE
TPVLFDVYEIK	K	K	FALSE	FALSE	E	11	10	20	2	8	0	NA	P50995	P50995	1A		sp|P50995-1|ENSG00000122359.17|ANXA11|ENST00000372231.7|101453-HCT-15_SNP_RNA-I278V-and-101453-HCT-15_SNP_EXOME-I278V|278v|	ANXA11_p.I278V	278	HCT-15	CAM	FALSE	TRUE	TRUE	TRUE
TQNKEESYDFFK	K	K	FALSE	FALSE	S	12	3	14	3	1	0	NA	Q9UDY2	Q9UDY2	1A		sp|Q9UDY2-1|ENSG00000119139.18|TJP2|ENST00000377245.8|90437-HCT-15_SNP_RNA-S1010F-and-90437-HCT-15_SNP_EXOME-S1010F|1010f|	TJP2_p.S1010F	1010	HCT-15	CAM	FALSE	TRUE	TRUE	TRUE
TSDGDLSDSTVSADPVVK	K	K	FALSE	FALSE	-	18	1	18	2	1	0	NA	Q2M389	Q2M389	1A		sp|Q2M389-1|ENSG00000136051.14|WASHC4|ENST00000332180.9|119892-HCT-15_RARE_RNA-N1158D-and-119892-HCT-15_RARE_EXOME-N1158D|1158d|	WASHC4_p.N1158D	1158	HCT-15	CAM	TRUE	FALSE	TRUE	TRUE
TSELPPLK	K	K	FALSE	FALSE	N	8	18	25	2	3	0	NA	Q14914	Q14914	1A		sp|Q14914-1|ENSG00000106853.18|PTGR1|ENST00000309195.9|94852-HCT-15_SNP_RNA-A27S-and-94852-HCT-15_SNP_EXOME-A27S|27s|	PTGR1_p.A27S	27	HCT-15	CAM	FALSE	TRUE	TRUE	TRUE
TSMSGFLLMGFSDDRK	L	K	FALSE	FALSE	L	16	5	20	4	1	0	NA	Q9UGF5	Q9UGF5	1A		sp|Q9UGF5|ENSG00000204695.4|OR14J1|ENST00000641895.1|63596-HCT-15_RARE_EXOME-E18D|18d|	OR14J1_p.E18D	18	HCT-15	CAM	TRUE	FALSE	FALSE	TRUE
TSSATSPISHLPGSLMELVEK	L	K	FALSE	FALSE	E	21	1	21	3	1	0	NA	Q969Z0	Q969Z0	1A		sp|Q969Z0-1|ENSG00000136270.13|TBRG4|ENST00000258770.7|78038-HCT-15_SNP_RNA-P57L-and-78038-HCT-15_SNP_EXOME-P57L|57l|	TBRG4_p.P57L	57	HCT-15	CAM	FALSE	TRUE	TRUE	TRUE
TTGIVMDSGDGVTHTVPIYEGYALPHAILC	R	C	FALSE	TRUE	L	30	32	61	4	4	0	30C(56.0374), 6M(15.9949)	P60709	P60709	1A	177	sp|P60709|ENSG00000075624.14|ACTB|ENST00000646664.1|76882-HCT-15_RARE_RNA-R177C-and-76882-HCT-15_RARE_EXOME-R177C|177c|	ACTB_p.R177C	177	HCT-15	CAM	TRUE	FALSE	TRUE	TRUE
TTGIVMDSGDGVTHTVPIYEGYALPHAILCLDLAGR	R	R	FALSE	FALSE	D	36	32	67	4, 5	14	0	30C(56.0374), 6M(15.9949)	P60709	P60709	1A	177	sp|P60709|ENSG00000075624.14|ACTB|ENST00000646664.1|76882-HCT-15_RARE_RNA-R177C-and-76882-HCT-15_RARE_EXOME-R177C|177c|	ACTB_p.R177C	177	HCT-15	CAM	TRUE	FALSE	TRUE	TRUE
TVPIYEGYALPHAILCLDLAGR	H	R	FALSE	FALSE	D	22	46	67	4	1	0	16C(56.0374)	P60709	P60709	1A	177	sp|P60709|ENSG00000075624.14|ACTB|ENST00000646664.1|76882-HCT-15_RARE_RNA-R177C-and-76882-HCT-15_RARE_EXOME-R177C|177c|	ACTB_p.R177C	177	HCT-15	CAM	TRUE	FALSE	TRUE	TRUE
TVTVSDLYAMNFEPR	C	R	TRUE	FALSE	A	15	15	29	2	3	0	NA	P16083	P16083	1A		sp|P16083|ENSG00000124588.19|NQO2|ENST00000338130.6|62795-HCT-15_SNP_RNA-L47F-and-62795-HCT-15_SNP_EXOME-L47F|47f|	NQO2_p.L47F	47	HCT-15	CAM	FALSE	TRUE	TRUE	TRUE
VDKGVVPLAGTNGETTIQGLDGLSER	K	R	FALSE	FALSE	C	26	3	28	2, 3	7	0	NA	P04075	P04075	1A		sp|P04075-1|ENSG00000149925.18|ALDOA|ENST00000569545.5|147948-HCT-15_RARE_EXOME-T125I|125i|	ALDOA_p.T125I	125	HCT-15	CAM	TRUE	FALSE	FALSE	TRUE
VEFATLQEALAHALMEK	R	K	FALSE	FALSE	E	17	1	17	3	7	0	15M(15.9949)	Q14980	Q14980	1A		sp|Q14980-1|ENSG00000137497.17|NUMA1|ENST00000393695.7|113171-HCT-15_SNP_RNA-T1057M-and-113171-HCT-15_SNP_EXOME-T1057M|1057m|	NUMA1_p.T1057M	1057	HCT-15	CAM	FALSE	TRUE	TRUE	TRUE
VGDYIYFENSSSNPYLIR	R	R	FALSE	FALSE	R	18	1	18	2	1	0	NA	Q13330	Q13330	1A		sp|Q13330-1|ENSG00000182979.17|MTA1|ENST00000331320.11|134319-HCT-15_SNP_EXOME-V12I|12i|	MTA1_p.V12I	12	HCT-15	CAM	FALSE	TRUE	FALSE	TRUE
VGEAGLLSVNCSEAGPGALGLEAVSDSGTK	K	K	FALSE	FALSE	A	30	1	30	3	2	0	11C(56.0374)	O75369	O75369	1A	1158	sp|O75369-1|ENSG00000136068.14|FLNB|ENST00000295956.8|35308-HCT-15_SNP_RNA-D1157N-and-35308-HCT-15_SNP_EXOME-D1157N|1157n|	FLNB_p.D1157N	1157	HCT-15	CAM	FALSE	TRUE	TRUE	TRUE
VIDGMTVVHSIELQATDGHDRPLTSC	K	C	FALSE	TRUE	S	26	3	28	5	2	0	26C(56.0374), 5M(15.9949)	P45877	P45877	1A	191	sp|P45877|ENSG00000168938.5|PPIC|ENST00000306442.4|60516-HCT-15_SNP_RNA-N190S-and-60516-HCT-15_SNP_EXOME-N190S|190s|	PPIC_p.N190S	190	HCT-15	CAM	FALSE	TRUE	TRUE	TRUE
VILLDIAR	R	R	FALSE	FALSE	G	8	26	33	2	1	0	NA	Q9H2M9	Q9H2M9	1A		sp|Q9H2M9-1|ENSG00000118873.15|RAB3GAP2|ENST00000358951.6|17140-HCT-15_SNP_RNA-V413I-and-17140-HCT-15_SNP_EXOME-V413I|413i|	RAB3GAP2_p.V413I	413	HCT-15	CAM	FALSE	TRUE	TRUE	TRUE
VLFPGCTPPAYLLDGLVR	R	R	FALSE	FALSE	L	18	6	23	3	4	0	6C(56.0374)	Q66K74	Q66K74	1A	435	sp|Q66K74-1|ENSG00000130479.10|MAP1S|ENST00000324096.8|174443-HCT-15_SNP_RNA-C440Y-and-174443-HCT-15_SNP_EXOME-C440Y|440y|	MAP1S_p.C440Y	440	HCT-15	CAM	FALSE	TRUE	TRUE	TRUE
VLGITVSR	K	R	FALSE	FALSE	G	8	8	15	2	2	0	NA	O60336	O60336	1A		sp|O60336-1|ENSG00000137802.13|MAPKBP1|ENST00000456763.6|138989-HCT-15_SNP_RNA-G51R-and-138989-HCT-15_SNP_EXOME-G51R|51r|	MAPKBP1_p.G51R	51	HCT-15	CAM	FALSE	TRUE	TRUE	TRUE
VLHASLQSVLHK	K	K	FALSE	FALSE	E	12	7	18	3	1	0	NA	Q15024	Q15024	1A		sp|Q15024|ENSG00000075914.12|EXOSC7|ENST00000265564.7|34435-HCT-15_SNP_RNA-V274L-and-34435-HCT-15_SNP_EXOME-V274L|274l|	EXOSC7_p.V274L	274	HCT-15	CAM	FALSE	TRUE	TRUE	TRUE
VLKEQALQEAMEQLEELELER	R	R	FALSE	FALSE	K	21	3	23	3	1	0	NA	Q9UH65	Q9UH65	1A		sp|Q9UH65|ENSG00000133789.14|SWAP70|ENST00000318950.10|103721-HCT-15_SNP_RNA-Q505E-and-103721-HCT-15_SNP_EXOME-Q505E|505e|	SWAP70_p.Q505E	505	HCT-15	CAM	FALSE	TRUE	TRUE	TRUE
VLKEQALQEAMEQLEELELERK	R	K	FALSE	FALSE	Q	22	3	24	4	1	0	NA	Q9UH65	Q9UH65	1A		sp|Q9UH65|ENSG00000133789.14|SWAP70|ENST00000318950.10|103721-HCT-15_SNP_RNA-Q505E-and-103721-HCT-15_SNP_EXOME-Q505E|505e|	SWAP70_p.Q505E	505	HCT-15	CAM	FALSE	TRUE	TRUE	TRUE
VLPQELVDLPLVK	K	K	FALSE	FALSE	F	13	8	20	2	2	0	NA	Q9Y2L9	Q9Y2L9	1A		sp|Q9Y2L9-1|ENSG00000136141.14|LRCH1|ENST00000389798.7|127740-HCT-15_SNP_RNA-S234P-and-127740-HCT-15_SNP_EXOME-S234P|234p|	LRCH1_p.S234P	234	HCT-15	CAM	FALSE	TRUE	TRUE	TRUE
VLQQLTEEAALDEASGFNIPAEQASRPWTQPR	R	R	FALSE	FALSE	G	32	19	50	3	3	0	NA	Q96K21	Q96K21	1A		sp|Q96K21-1|ENSG00000166140.17|ZFYVE19|ENST00000355341.8|138875-HCT-15_SNP_RNA-S376A-and-138875-HCT-15_SNP_EXOME-S376A|376a|	ZFYVE19_p.S376A	376	HCT-15	CAM	FALSE	TRUE	TRUE	TRUE
VNLEEQLK	K	K	FALSE	FALSE	E	8	9	16	2	1	0	NA	Q9HAV7	Q9HAV7	1A		sp|Q9HAV7|ENSG00000109519.12|GRPEL1|ENST00000264954.4|49557-HCT-15_RARE_RNA-K66N-and-49557-HCT-15_RARE_EXOME-K66N|66n|	GRPEL1_p.K66N	66	HCT-15	CAM	TRUE	FALSE	TRUE	TRUE
VQSSYLHSLLEMGDLLK	K	K	FALSE	FALSE	K	17	1	17	3	1	0	NA	Q14CX7	Q14CX7	1A		sp|Q14CX7-1|ENSG00000111300.9|NAA25|ENST00000261745.8|126112-HCT-15_RARE_RNA-E958D-and-126112-HCT-15_RARE_EXOME-E958D|958d|	NAA25_p.E958D	958	HCT-15	CAM	TRUE	FALSE	TRUE	TRUE
VQVLAAQLLSEMK	R	K	FALSE	FALSE	L	13	11	23	2	4	0	NA	Q6P9B6	Q6P9B6	1A		sp|Q6P9B6|ENSG00000140950.15|TLDC1|ENST00000343629.10|155273-HCT-15_SNP_RNA-D172E-and-155273-HCT-15_SNP_EXOME-D172E|172e|	TLDC1_p.D172E	172	HCT-15	CAM	FALSE	TRUE	TRUE	TRUE
VSHLPLVEELR	R	R	FALSE	FALSE	S	11	1	11	3	4	0	NA	P49736	P49736	1A		sp|P49736|ENSG00000073111.13|MCM2|ENST00000265056.11|36591-HCT-15_RARE_RNA-I285V-and-36591-HCT-15_RARE_EXOME-I285V|285v|	MCM2_p.I285V	285	HCT-15	CAM	TRUE	FALSE	TRUE	TRUE
VSIAELAQASNSLITWGR	R	R	FALSE	FALSE	E	18	5	22	2	2	0	NA	Q96HY6	Q96HY6	1A		sp|Q96HY6-1|ENSG00000198171.12|DDRGK1|ENST00000354488.7|187610-HCT-15_SNP_RNA-A303T-and-187610-HCT-15_SNP_EXOME-A303T|303t|	DDRGK1_p.A303T	303	HCT-15	CAM	FALSE	TRUE	TRUE	TRUE
VVDNTTAKEFAGSLGIPFLETSAK	K	K	FALSE	FALSE	N	24	4	27	3	1	0	NA	Q9H0U4	Q9H0U4	1A		sp|Q9H0U4|ENSG00000174903.15|RAB1B|ENST00000311481.10|106330-HCT-15_RARE_RNA-D141G-and-106330-HCT-15_RARE_EXOME-D141G|141g|	RAB1B_p.D141G	141	HCT-15	CAM	TRUE	FALSE	TRUE	TRUE
VVVRPLVLLSVVDHFNR	K	R	FALSE	FALSE	L	17	9	25	3, 4	2	0	NA	P51665	P51665	1A		sp|P51665|ENSG00000103035.10|PSMD7|ENST00000219313.8|150153-HCT-15_RARE_RNA-H12R-and-150153-HCT-15_RARE_EXOME-H12R|12r|	PSMD7_p.H12R	12	HCT-15	CAM	TRUE	FALSE	TRUE	TRUE
WAPQCYPSSVNSAR	K	R	FALSE	FALSE	T	14	14	27	3	1	0	5C(56.0374)	Q9H9A5	Q9H9A5	1A	633	sp|Q9H9A5-1|ENSG00000182973.18|CNOT10|ENST00000328834.9|33799-HCT-15_RARE_EXOME-R629W|629w|	CNOT10_p.R629W	629	HCT-15	CAM	TRUE	FALSE	FALSE	TRUE
WDYHTTHINQLQLLSTIDESPIFK	R	K	FALSE	FALSE	E	24	15	38	4	1	0	NA	O94923	O94923	1A		sp|O94923|ENSG00000138604.9|GLCE|ENST00000261858.6|140177-HCT-15_SNP_RNA-V597I-and-140177-HCT-15_SNP_EXOME-V597I|597i|	GLCE_p.V597I	597	HCT-15	CAM	FALSE	TRUE	TRUE	TRUE
WGQIILK	R	K	FALSE	FALSE	N	7	5	11	2	1	0	NA	Q9H4A4	Q9H4A4	1A		sp|Q9H4A4|ENSG00000176393.10|RNPEP|ENST00000295640.8|7673-HCT-15_SNP_RNA-V579I-and-7673-HCT-15_SNP_EXOME-V579I|579i|	RNPEP_p.V579I	579	HCT-15	CAM	FALSE	TRUE	TRUE	TRUE
WLSTSIPEAQWHSSLSR	R	R	FALSE	FALSE	T	17	6	22	2, 3	4	0	NA	P49327	P49327	1A		sp|P49327|ENSG00000169710.8|FASN|ENST00000306749.3|168265-HCT-15_SNP_RNA-A727S-and-168265-HCT-15_SNP_EXOME-A727S|727s|	FASN_p.A727S	727	HCT-15	CAM	FALSE	TRUE	TRUE	TRUE
YASICQQNGIVPIVEPEILPDGGHDLK	R	K	FALSE	FALSE	R	27	1	27	3, 4	17	0	5C(56.0374)	P04075	P04075	1A	178	sp|P04075-1|ENSG00000149925.18|ALDOA|ENST00000569545.5|147948-HCT-15_RARE_RNA-D196G-and-147948-HCT-15_RARE_EXOME-D196G|196g|	ALDOA_p.D196G	196	HCT-15	CAM	TRUE	FALSE	TRUE	TRUE
YASICQQNGIVPIVEPEILPDGGHDLKR	R	R	FALSE	FALSE	C	28	1	28	3, 4, 5	13	0	5C(56.0374)	P04075	P04075	1A	178	sp|P04075-1|ENSG00000149925.18|ALDOA|ENST00000569545.5|147948-HCT-15_RARE_RNA-D196G-and-147948-HCT-15_RARE_EXOME-D196G|196g|	ALDOA_p.D196G	196	HCT-15	CAM	TRUE	FALSE	TRUE	TRUE
YFVEAGDMAVR	K	R	FALSE	FALSE	R	11	24	34	2	3	0	NA	P17987	P17987	1A		sp|P17987|ENSG00000120438.11|TCP1|ENST00000321394.11|71383-HCT-15_RARE_RNA-A305D-and-71383-HCT-15_RARE_EXOME-A305D|305d|	TCP1_p.A305D	305	HCT-15	CAM	TRUE	FALSE	TRUE	TRUE
YIELFLNSTPGGGYGMGGSGMGGYGR	R	R	FALSE	FALSE	D	26	1	26	2	4	0	16M(15.9949), 21M(15.9949)	P31942	P31942	1A		sp|P31942-1|ENSG00000096746.17|HNRNPH3|ENST00000265866.11|97564-HCT-15_RARE_RNA-S275Y-and-97564-HCT-15_RARE_EXOME-S275Y|275y|	HNRNPH3_p.S275Y	275	HCT-15	CAM	TRUE	FALSE	TRUE	TRUE
YLQEVINVLETDGHFR	R	R	FALSE	FALSE	E	16	1	16	3	1	0	NA	Q02818	Q02818	1A		sp|Q02818|ENSG00000104805.15|NUCB1|ENST00000405315.8|177152-HCT-15_RARE_RNA-D60N-and-177152-HCT-15_RARE_EXOME-D60N|60n|	NUCB1_p.D60N	60	HCT-15	CAM	TRUE	FALSE	TRUE	TRUE
YPDSNPYSLLDNTESDQTADTDASESHHSTNR	K	R	FALSE	FALSE	R	32	11	42	4	1	0	NA	P51114	P51114	1A		sp|P51114-1|ENSG00000114416.17|FXR1|ENST00000357559.8|38038-HCT-15_RARE_RNA-D471Y-and-38038-HCT-15_RARE_EXOME-D471Y|471y|	FXR1_p.D471Y	471	HCT-15	CAM	TRUE	FALSE	TRUE	TRUE
YQDTPGVEHIPVVQIDLSVPLKVPGLPMSDR	R	R	FALSE	FALSE	Y	31	4	34	4	1	0	NA	O14617	O14617	1A		sp|O14617-1|ENSG00000065000.16|AP3D1|ENST00000345016.9|179079-HCT-15_RARE_RNA-Q723R-and-179079-HCT-15_RARE_EXOME-Q723R|723r|	AP3D1_p.Q723R	723	HCT-15	CAM	TRUE	FALSE	TRUE	TRUE
YQEEPPAPQPK	R	K	FALSE	FALSE	A	11	1	11	2	2	0	NA	Q9UDY2	Q9UDY2	1A		sp|Q9UDY2-1|ENSG00000119139.18|TJP2|ENST00000377245.8|90437-HCT-15_SNP_EXOME-D482E|482e|	TJP2_p.D482E	482	HCT-15	CAM	FALSE	TRUE	FALSE	TRUE
YSLIDPSSAPELLR	R	R	FALSE	FALSE	L	14	10	23	2	2	0	NA	Q9UDT6	Q9UDT6	1A		sp|Q9UDT6-1|ENSG00000106665.15|CLIP2|ENST00000395060.5|73639-HCT-15_SNP_RNA-R977P-and-73639-HCT-15_SNP_EXOME-R977P|977p|	CLIP2_p.R977P	977	HCT-15	CAM	FALSE	TRUE	TRUE	TRUE
YSTTALLEQLEETTR	R	R	FALSE	FALSE	E	15	1	15	2	1	0	NA	Q53EZ4	Q53EZ4	1A		sp|Q53EZ4-1|ENSG00000138180.15|CEP55|ENST00000371485.7|98397-HCT-15_SNP_RNA-T99A-and-98397-HCT-15_SNP_EXOME-T99A|99a|	CEP55_p.T99A	99	HCT-15	CAM	FALSE	TRUE	TRUE	TRUE
YTLPPGVDPAQVSSSLSPEGTLTVEAPMPK	K	K	FALSE	FALSE	L	30	8	37	2	3	0	NA	P04792	P04792	1A		sp|P04792|ENSG00000106211.8|HSPB1|ENST00000248553.6|73783-HCT-15_RARE_RNA-T151A-and-73783-HCT-15_RARE_EXOME-T151A|151a|	HSPB1_p.T151A	151	HCT-15	CAM	TRUE	FALSE	TRUE	TRUE
YVALDFEQEMAIAASSSSLEK	C	K	TRUE	FALSE	S	21	1	21	2	1	0	NA	P0CG38	P0CG38	1A		sp|P0CG38|ENSG00000196834.11|POTEI|ENST00000451531.6|29623-HCT-15_SNP_EXOME-M929I|929i|	POTEI_p.M929I	929	HCT-15	CAM	FALSE	TRUE	FALSE	TRUE
YVQSAQSQIHNTC	R	C	FALSE	TRUE	W	13	21	33	3	1	0	13C(56.0374)	P48449	P48449	1A	653	sp|P48449-1|ENSG00000160285.14|LSS|ENST00000356396.8|191940-HCT-15_SNP_RNA-L642V-and-191940-HCT-15_SNP_EXOME-L642V|642v|	LSS_p.L642V	642	HCT-15	CAM	FALSE	TRUE	TRUE	TRUE
AAAAAAAAAPAAAATAATTAATTAATAAQ	K	Q	FALSE	FALSE	-	29	6	34	2	3	0	NA	P37108	P37108	1B		sp|P37108|ENSG00000140319.10|SRP14|ENST00000267884.10|142380-HCT-15_SNP_RNA-P124A-and-142380-HCT-15_SNP_EXOME-P124A|124a|	SRP14_p.P124A	124	HCT-15	CAM	FALSE	TRUE	TRUE	TRUE
AAAAAAAAPAATSGSGGCPPAPGLESGAGA	R	A	FALSE	FALSE	V	30	1	30	3	1	0	NA	Q5VZB9	Q5VZB9	1B	74	sp|Q5VZB9|ENSG00000176399.3|DMRTA1|ENST00000325870.2|89715-HCT-15_SNP_EXOME-A65P,89715-HCT-15_RARE_EXOME-V84A|65p84a|	DMRTA1_p.A65P,V84A	65,84	HCT-15	CAM	TRUE	TRUE	FALSE	TRUE
AAAVRPDLAQLMNSSGSHK	M	K	FALSE	FALSE	D	19	2	20	3	4	0	N-term(42.0106)	Q9BT78	Q9BT78	1B		sp|Q9BT78-1|ENSG00000138663.8|COPS4|ENST00000264389.6|47267-HCT-15_RARE_RNA-Q7P-and-47267-HCT-15_RARE_EXOME-Q7P|7p|	COPS4_p.Q7P	7	HCT-15	CAM	TRUE	FALSE	TRUE	TRUE
AAGAAEAAVAAVEEVGSAGHFEELLR	M	R	FALSE	FALSE	L	26	1	26	2, 3	7	0	N-term(42.0106)	O76003	O76003	1B		sp|O76003|ENSG00000108010.11|GLRX3|ENST00000331244.9|99420-HCT-15_SNP_RNA-Q21H-and-99420-HCT-15_SNP_EXOME-Q21H|21h|	GLRX3_p.Q21H	21	HCT-15	CAM	FALSE	TRUE	TRUE	TRUE
AALAGHPQAHFLDADPGFVHSDGTISHHDMYDYLHLSR	R	R	FALSE	FALSE	L	38	10	47	6	1	0	NA	Q15102	Q15102	1B		sp|Q15102|ENSG00000079462.7|PAFAH1B3|ENST00000262890.7|182746-HCT-15_RARE_RNA-R168Q-and-182746-HCT-15_RARE_EXOME-R168Q|168q|	PAFAH1B3_p.R168Q	168	HCT-15	CAM	TRUE	FALSE	TRUE	TRUE
AALVDLEPC	R	C	FALSE	TRUE	T	9	7	15	2	6	0	9C(56.0374)	Q9BUF5	Q9BUF5	1B	71	sp|Q9BUF5|ENSG00000176014.12|TUBB6|ENST00000317702.9|168837-HCT-15_RARE_RNA-G71C-and-168837-HCT-15_RARE_EXOME-G71C|71c|	TUBB6_p.G71C	71	HCT-15	CAM	TRUE	FALSE	TRUE	TRUE
AAPTFMISPETITGTGK	S	K	FALSE	FALSE	K	17	29	45	2	2	0	NA	P27816	P27816	1B		sp|P27816-1|ENSG00000047849.21|MAP4|ENST00000360240.10|40535-HCT-15_SNP_EXOME-V628I|628i|	MAP4_p.V628I	628	HCT-15	CAM	FALSE	TRUE	FALSE	TRUE
AATMENAVLLETNTVEEK	K	K	FALSE	FALSE	N	18	1	18	2	2	0	NA	Q5UIP0	Q5UIP0	1B		sp|Q5UIP0-1|ENSG00000080345.17|RIF1|ENST00000444746.6|22437-HCT-15_SNP_RNA-V1362M-and-22437-HCT-15_SNP_EXOME-V1362M|1362m|	RIF1_p.V1362M	1362	HCT-15	CAM	FALSE	TRUE	TRUE	TRUE
AAVPAPEEEMDECEQALAAEPK	K	K	FALSE	FALSE	A	22	8	29	2, 3	13	0	13C(56.0374)	P26641	P26641	1B	266	sp|P26641-1|ENSG00000254772.9|EEF1G|ENST00000329251.4|112031-HCT-15_RARE_RNA-A256V-and-112031-HCT-15_RARE_EXOME-A256V|256v|	EEF1G_p.A256V	256	HCT-15	CAM	TRUE	FALSE	TRUE	TRUE
ADASSTSSFQQAFASSC	R	C	FALSE	TRUE	T	17	8	24	2	3	0	17C(56.0374)	Q68CZ2	Q68CZ2	1B	928	sp|Q68CZ2-1|ENSG00000136205.16|TNS3|ENST00000311160.13|78095-HCT-15_SNP_RNA-P918S-and-78095-HCT-15_SNP_EXOME-P918S|918s|	TNS3_p.P918S	918	HCT-15	CAM	FALSE	TRUE	TRUE	TRUE
AEAMDVDTPSGTNSGAGKK	M	K	FALSE	FALSE	R	19	2	20	2	1	0	N-term(42.0106)	P62877	P62877	1B		sp|P62877|ENSG00000100387.8|RBX1|ENST00000216225.8|193858-HCT-15_RARE_RNA-A3E-and-193858-HCT-15_RARE_EXOME-A3E|3e|	RBX1_p.A3E	3	HCT-15	CAM	TRUE	FALSE	TRUE	TRUE
AEEPGDGPAEEWLGR	K	R	FALSE	FALSE	A	15	18	32	2	1	0	NA	Q587I9	Q587I9	1B		sp|Q587I9|ENSG00000173349.5|SFT2D3|ENST00000310981.5|21862-HCT-15_SNP_EXOME-R38G|38g|	SFT2D3_p.R38G	38	HCT-15	CAM	FALSE	TRUE	FALSE	TRUE
AELQTESLTPVPNSGSSVLGSLFK	K	K	FALSE	FALSE	Q	24	1	24	2	1	0	NA	Q6WKZ4	Q6WKZ4	1B		sp|Q6WKZ4-4|ENSG00000156675.15|RAB11FIP1|ENST00000330843.8|86167-HCT-15_SNP_RNA-A651V-and-86167-HCT-15_SNP_EXOME-A651V|651v|	RAB11FIP1_p.A651V	651	HCT-15	CAM	FALSE	TRUE	TRUE	TRUE
AENTEGDLNSNLPHAPYHTGDPQLDTAIGQWLR	M	R	FALSE	FALSE	W	33	2	34	3	1	0	N-term(42.0106)	Q6PCE3	Q6PCE3	1B		sp|Q6PCE3|ENSG00000165434.7|PGM2L1|ENST00000298198.4|113409-HCT-15_SNP_EXOME-L14P|14p|	PGM2L1_p.L14P	14	HCT-15	CAM	FALSE	TRUE	FALSE	TRUE
AFSEYLGTDQSK	K	K	FALSE	FALSE	W	12	22	33	2	4	0	NA	P10768	P10768	1B		sp|P10768|ENSG00000139684.13|ESD|ENST00000378720.7|129610-HCT-15_SNP_RNA-G190E-and-129610-HCT-15_SNP_EXOME-G190E|190e|	ESD_p.G190E	190	HCT-15	CAM	FALSE	TRUE	TRUE	TRUE
AGALMMPLVDQLENR	R	R	FALSE	FALSE	L	15	1	15	2	1	0	NA	Q9H583	Q9H583	1B		sp|Q9H583|ENSG00000119285.10|HEATR1|ENST00000366582.7|17722-HCT-15_SNP_RNA-E2017G-and-17722-HCT-15_SNP_EXOME-E2017G|2017g|	HEATR1_p.E2017G	2017	HCT-15	CAM	FALSE	TRUE	TRUE	TRUE
AGEGSYALDSESCMEK	K	K	FALSE	FALSE	L	16	13	28	3	1	0	13C(56.0374)	O00541	O00541	1B	272	sp|O00541-1|ENSG00000100029.17|PES1|ENST00000354694.11|195397-HCT-15_RARE_RNA-T264S-and-195397-HCT-15_RARE_EXOME-T264S|264s|	PES1_p.T264S	264	HCT-15	CAM	TRUE	FALSE	TRUE	TRUE
AGHQSAAASNLSGLSLQEAQQILNVSK	R	K	FALSE	FALSE	L	27	5	31	3	3	0	NA	Q9Y3D7	Q9Y3D7	1B		sp|Q9Y3D7|ENSG00000217930.7|PAM16|ENST00000318059.7|151848-HCT-15_SNP_RNA-R44Q-and-151848-HCT-15_SNP_EXOME-R44Q|44q|	PAM16_p.R44Q	44	HCT-15	CAM	FALSE	TRUE	TRUE	TRUE
AGIYEILNELGFPELESR	K	R	FALSE	FALSE	E	18	15	32	2	2	0	NA	Q9ULE6	Q9ULE6	1B		sp|Q9ULE6|ENSG00000107719.8|PALD1|ENST00000263563.6|97706-HCT-15_SNP_RNA-G828R-and-97706-HCT-15_SNP_EXOME-G828R|828r|	PALD1_p.G828R	828	HCT-15	CAM	FALSE	TRUE	TRUE	TRUE
AGTFPVNGPPR	K	R	FALSE	FALSE	D	11	1	11	2	1	0	NA	Q9Y5Y0	Q9Y5Y0	1B		sp|Q9Y5Y0-1|ENSG00000162769.12|FLVCR1|ENST00000366971.8|8299-HCT-15_SNP_RNA-A52P-and-8299-HCT-15_SNP_EXOME-A52P|52p|	FLVCR1_p.A52P	52	HCT-15	CAM	FALSE	TRUE	TRUE	TRUE
AGTNGETTIQGLDGLSER	L	R	FALSE	FALSE	C	18	11	28	2	2	0	NA	P04075	P04075	1B		sp|P04075-1|ENSG00000149925.18|ALDOA|ENST00000569545.5|147948-HCT-15_RARE_EXOME-T125I|125i|	ALDOA_p.T125I	125	HCT-15	CAM	TRUE	FALSE	FALSE	TRUE
AGVAAPATQVVQVTLQSVQR	K	R	FALSE	FALSE	R	20	1	20	2	2	0	NA	Q15149	Q15149	1B		sp|Q15149-1|ENSG00000178209.14|PLEC|ENST00000322810.8|89058-HCT-15_SNP_RNA-A641V-and-89058-HCT-15_SNP_EXOME-A641V|641v|	PLEC_p.A641V	641	HCT-15	CAM	FALSE	TRUE	TRUE	TRUE
AHAFVVQQK	K	K	FALSE	FALSE	E	9	1	9	2	6	0	NA	Q15149	Q15149	1B		sp|Q15149-1|ENSG00000178209.14|PLEC|ENST00000322810.8|89058-HCT-15_SNP_RNA-A2194V-and-89058-HCT-15_SNP_EXOME-A2194V|2194v|	PLEC_p.A2194V	2194	HCT-15	CAM	FALSE	TRUE	TRUE	TRUE
AHGAPINSLLLVDENVLATGDDTGGIR	K	R	FALSE	FALSE	L	27	1	27	3	3	0	NA	Q9H6Y2	Q9H6Y2	1B		sp|Q9H6Y2-1|ENSG00000120314.18|WDR55|ENST00000358337.9|56558-HCT-15_SNP_RNA-C151R-and-56558-HCT-15_SNP_EXOME-C151R|151r|	WDR55_p.C151R	151	HCT-15	CAM	FALSE	TRUE	TRUE	TRUE
AIFSHAAEDNSTLLSFK	K	K	FALSE	FALSE	E	17	5	21	3	1	0	NA	Q9UQB8	Q9UQB8	1B		sp|Q9UQB8-1|ENSG00000175866.15|BAIAP2|ENST00000321300.10|161442-HCT-15_RARE_RNA-G388E-and-161442-HCT-15_RARE_EXOME-G388E|388e|	BAIAP2_p.G388E	388	HCT-15	CAM	TRUE	FALSE	TRUE	TRUE
AIVSQQFVEMTR	K	R	FALSE	FALSE	T	12	6	17	2	1	0	NA	P48444	P48444	1B		sp|P48444-1|ENSG00000095139.13|ARCN1|ENST00000264028.4|108466-HCT-15_SNP_RNA-R19Q-and-108466-HCT-15_SNP_EXOME-R19Q|19q|	ARCN1_p.R19Q	19	HCT-15	CAM	FALSE	TRUE	TRUE	TRUE
ALEQQPLAAGVAPPELQWLR	R	R	FALSE	FALSE	A	20	1	20	2	1	0	NA	O95613	O95613	1B		sp|O95613-1|ENSG00000160299.16|PCNT|ENST00000359568.9|190731-HCT-15_SNP_RNA-A1914V-and-190731-HCT-15_SNP_EXOME-A1914V|1914v|	PCNT_p.A1914V	1914	HCT-15	CAM	FALSE	TRUE	TRUE	TRUE
ALLNAESLPTHR	R	R	FALSE	FALSE	K	12	7	18	3	1	0	NA	Q9NVH0	Q9NVH0	1B		sp|Q9NVH0-1|ENSG00000081177.18|EXD2|ENST00000409018.7|132538-HCT-15_SNP_RNA-Q518H-and-132538-HCT-15_SNP_EXOME-Q518H|518h|	EXD2_p.Q518H	518	HCT-15	CAM	FALSE	TRUE	TRUE	TRUE
ALTAQLPVLPR	R	R	FALSE	FALSE	S	11	21	31	2	2	0	NA	Q96GK7	Q96GK7	1B		sp|Q96GK7|ENSG00000115042.9|FAHD2A|ENST00000447036.5|20778-HCT-15_RARE_EXOME-A85T|85t|	FAHD2A_p.A85T	85	HCT-15	CAM	TRUE	FALSE	FALSE	TRUE
AMAAMPQDVVR	R	R	FALSE	FALSE	Q	11	1	11	2	1	0	2M(15.9949)	Q969V3	Q969V3	1B		sp|Q969V3-1|ENSG00000125912.10|NCLN|ENST00000246117.8|172703-HCT-15_SNP_RNA-V119M-and-172703-HCT-15_SNP_EXOME-V119M|119m|	NCLN_p.V119M	119	HCT-15	CAM	FALSE	TRUE	TRUE	TRUE
ANFSPFGNSQGPSR	K	R	FALSE	FALSE	V	14	1	14	2	2	0	NA	Q9H2M9	Q9H2M9	1B		sp|Q9H2M9-1|ENSG00000118873.15|RAB3GAP2|ENST00000358951.6|17140-HCT-15_SNP_RNA-D448N-and-17140-HCT-15_SNP_EXOME-D448N|448n|	RAB3GAP2_p.D448N	448	HCT-15	CAM	FALSE	TRUE	TRUE	TRUE
ANHAVSEGTK	L	K	FALSE	FALSE	A	10	17	26	2	1	0	NA	Q99880	Q99880	1B		sp|Q99880|ENSG00000185130.5|HIST1H2BL|ENST00000377401.3|67796-HCT-15_RARE_RNA-K109N-and-67796-HCT-15_RARE_EXOME-K109N|109n|	HIST1H2BL_p.K109N	109	HCT-15	CAM	TRUE	FALSE	TRUE	TRUE
APADPAPAPADPASPQHQPAGPAPLLSTPAPEAR	R	R	FALSE	FALSE	P	34	5	38	3	1	0	NA	Q96AD5	Q96AD5	1B		sp|Q96AD5-1|ENSG00000177666.16|PNPLA2|ENST00000336615.8|103004-HCT-15_SNP_RNA-L481P-and-103004-HCT-15_SNP_EXOME-L481P|481p|	PNPLA2_p.L481P	481	HCT-15	CAM	FALSE	TRUE	TRUE	TRUE
APADPAPAPADPASPQHQPAGPAPLLSTPAPEARPVIGALGL	R	L	FALSE	FALSE	-	42	5	46	3	2	0	NA	Q96AD5	Q96AD5	1B		sp|Q96AD5-1|ENSG00000177666.16|PNPLA2|ENST00000336615.8|103004-HCT-15_SNP_RNA-L481P-and-103004-HCT-15_SNP_EXOME-L481P|481p|	PNPLA2_p.L481P	481	HCT-15	CAM	FALSE	TRUE	TRUE	TRUE
APHNPAPPMSTVIHIR	G	R	FALSE	FALSE	S	16	1	16	4	2	0	NA	Q01629	Q01629	1B		sp|Q01629|ENSG00000185201.16|IFITM2|ENST00000616316.1|102873-HCT-15_SNP_RNA-V33A-and-102873-HCT-15_SNP_EXOME-V33A|33a|	IFITM2_p.V33A	33	HCT-15	CAM	FALSE	TRUE	TRUE	TRUE
APKPEDIDEEYDDVPDLVENFDEASK	K	K	FALSE	FALSE	N	26	3	28	3	2	0	NA	Q96K17	Q96K17	1B		sp|Q96K17-1|ENSG00000134717.17|BTF3L4|ENST00000313334.12|3146-HCT-15_RARE_RNA-D139Y-and-3146-HCT-15_RARE_EXOME-D139Y|139y|	BTF3L4_p.D139Y	139	HCT-15	CAM	TRUE	FALSE	TRUE	TRUE
APPMPGPVPEAAQPFLFTPR	K	R	FALSE	FALSE	G	20	1	20	2	3	0	NA	Q7Z406	Q7Z406	1B		sp|Q7Z406-1|ENSG00000105357.16|MYH14|ENST00000376970.6|177517-HCT-15_RARE_RNA-R16M-and-177517-HCT-15_RARE_EXOME-R16M|16m|	MYH14_p.R16M	16	HCT-15	CAM	TRUE	FALSE	TRUE	TRUE
APPWVPAMGFTLAPSMGC	M	C	FALSE	TRUE	F	18	1	18	2	1	0	18C(56.0374)	P30536	P30536	1B	19	sp|P30536-1|ENSG00000100300.17|TSPO|ENST00000337554.7|194007-HCT-15_RARE_RNA-L17M-and-194007-HCT-15_RARE_EXOME-L17M|17m|	TSPO_p.L17M	17	HCT-15	CAM	TRUE	FALSE	TRUE	TRUE
APSPLYSVEFSEEPFGVIVHR	R	R	FALSE	FALSE	Q	21	1	21	2, 3	9	0	NA	P10253	P10253	1B		sp|P10253|ENSG00000171298.12|GAA|ENST00000390015.7|161319-HCT-15_SNP_RNA-R223H-and-161319-HCT-15_SNP_EXOME-R223H|223h|	GAA_p.R223H	223	HCT-15	CAM	FALSE	TRUE	TRUE	TRUE
AQAALQAVNSVQSGNLALAASAVAVDAGMAMAGQSPVLR	R	R	FALSE	FALSE	L	39	12	50	3	3	0	29M(15.9949), 31M(15.9949)	P26599	P26599	1B		sp|P26599-1|ENSG00000011304.19|PTBP1|ENST00000349038.8|172261-HCT-15_RARE_RNA-A169V-and-172261-HCT-15_RARE_EXOME-A169V|169v|	PTBP1_p.A169V	169	HCT-15	CAM	TRUE	FALSE	TRUE	TRUE
AQEALDAVSTLEEGHTQYLTSLADASALVAALTR	R	R	FALSE	FALSE	F	34	14	47	3	4	0	NA	O75146	O75146	1B		sp|O75146-1|ENSG00000130787.13|HIP1R|ENST00000253083.8|120763-HCT-15_SNP_RNA-A676T-and-120763-HCT-15_SNP_EXOME-A676T|676t|	HIP1R_p.A676T	676	HCT-15	CAM	FALSE	TRUE	TRUE	TRUE
AQEALLQLSQALSLMETVK	R	K	FALSE	FALSE	Q	19	1	19	2	13	0	15M(15.9949)	O60664	O60664	1B		sp|O60664-1|ENSG00000105355.8|PLIN3|ENST00000221957.8|179418-HCT-15_SNP_RNA-V275A-and-179418-HCT-15_SNP_EXOME-V275A|275a|	PLIN3_p.V275A	275	HCT-15	CAM	FALSE	TRUE	TRUE	TRUE
ASEDPLLNLVSPLGCEVDVEEGDVGR	R	R	FALSE	FALSE	D	26	18	43	3	2	0	15C(56.0374)	Q8NDH3	Q8NDH3	1B	504	sp|Q8NDH3-1|ENSG00000215440.11|NPEPL1|ENST00000356091.10|186970-HCT-15_RARE_RNA-L513V-and-186970-HCT-15_RARE_EXOME-L513V|513v|	NPEPL1_p.L513V	513	HCT-15	CAM	TRUE	FALSE	TRUE	TRUE
ASLGSLEGEAEAETSSPK	K	K	FALSE	FALSE	G	18	1	18	2	3	0	NA	Q09666	Q09666	1B		sp|Q09666-1|ENSG00000124942.13|AHNAK|ENST00000378024.8|112027-HCT-15_RARE_RNA-A5761T-and-112027-HCT-15_RARE_EXOME-A5761T|5761t|	AHNAK_p.A5761T	5761	HCT-15	CAM	TRUE	FALSE	TRUE	TRUE
ASPLLAIGQTLAR	R	R	FALSE	FALSE	Q	13	1	13	2	1	0	NA	Q9NSI2	Q9NSI2	1B		sp|Q9NSI2-1|ENSG00000160256.12|FAM207A|ENST00000291634.10|190628-HCT-15_SNP_RNA-V212L-and-190628-HCT-15_SNP_EXOME-V212L|212l|	FAM207A_p.V212L	212	HCT-15	CAM	FALSE	TRUE	TRUE	TRUE
ASSSILINESEPITNIQIR	K	R	FALSE	FALSE	L	19	1	19	2	2	0	NA	Q9UNZ2	Q9UNZ2	1B		sp|Q9UNZ2-1|ENSG00000088833.17|NSFL1C|ENST00000216879.8|187508-HCT-15_SNP_RNA-D290N-and-187508-HCT-15_SNP_EXOME-D290N,187508-HCT-15_RARE_RNA-T295I-and-187508-HCT-15_RARE_EXOME-T295I|290n295i|	NSFL1C_p.D290N,T295I	290295	HCT-15	CAM	TRUE	TRUE	TRUE	TRUE
ATAMYLEHYLDSVENLPC	M	C	FALSE	TRUE	E	18	2	19	2	1	0	18C(56.0374), N-term(42.0106)	Q8WYH8	Q8WYH8	1B	19	sp|Q8WYH8-1|ENSG00000168395.15|ING5|ENST00000313552.10|25590-HCT-15_RARE_RNA-I14V-and-25590-HCT-15_RARE_EXOME-I14V|14v|	ING5_p.I14V	14	HCT-15	CAM	TRUE	FALSE	TRUE	TRUE
ATCGSGVTACHVALGAYLCGKTDVPIYDGSWVEWYMR	V	R	FALSE	FALSE	A	37	1	37	4	1	0	3C(56.0374)	P25325	P25325	1B	248255264	sp|P25325-1|ENSG00000128309.16|MPST|ENST00000401419.7|193484-HCT-15_RARE_RNA-P267T-and-193484-HCT-15_RARE_EXOME-P267T|267t|	MPST_p.P267T	267	HCT-15	CAM	TRUE	FALSE	TRUE	TRUE
ATSPASQLSPTELTEMR	L	R	FALSE	FALSE	N	17	1	17	2	1	0	NA	Q9NYK5	Q9NYK5	1B		sp|Q9NYK5-1|ENSG00000154719.13|MRPL39|ENST00000352957.8|191066-HCT-15_SNP_RNA-S31P-and-191066-HCT-15_SNP_EXOME-S31P|31p|	MRPL39_p.S31P	31	HCT-15	CAM	FALSE	TRUE	TRUE	TRUE
AVEVATVVIQPTVLR	K	R	FALSE	FALSE	A	15	22	36	2	2	0	NA	Q9P2B2	Q9P2B2	1B		sp|Q9P2B2|ENSG00000134247.9|PTGFRN|ENST00000393203.2|5014-HCT-15_SNP_EXOME-S277T|277t|	PTGFRN_p.S277T	277	HCT-15	CAM	FALSE	TRUE	FALSE	TRUE
AVGRLEAVSHTSDMHSGYADSPSK	R	K	FALSE	FALSE	A	24	1	24	4, 5	3	0	NA	Q01518	Q01518	1B		sp|Q01518-1|ENSG00000131236.16|CAP1|ENST00000372797.7|2315-HCT-15_RARE_RNA-R29S-and-2315-HCT-15_RARE_EXOME-R29S|29s|	CAP1_p.R29S	29	HCT-15	CAM	TRUE	FALSE	TRUE	TRUE
AVSMLEADHMPPSR	R	R	FALSE	FALSE	L	14	22	35	3	2	0	NA	Q99959	Q99959	1B		sp|Q99959-1|ENSG00000057294.14|PKP2|ENST00000070846.10|122833-HCT-15_SNP_RNA-L366P-and-122833-HCT-15_SNP_EXOME-L366P|366p|	PKP2_p.L366P	366	HCT-15	CAM	FALSE	TRUE	TRUE	TRUE
AVTFSPELGPVPHEGLGEYNR	K	R	FALSE	FALSE	A	21	1	21	3	1	0	NA	Q9P1Y5	Q9P1Y5	1B		sp|Q9P1Y5-1|ENSG00000076826.9|CAMSAP3|ENST00000160298.8|173089-HCT-15_SNP_RNA-D687E-and-173089-HCT-15_SNP_EXOME-D687E|687e|	CAMSAP3_p.D687E	687	HCT-15	CAM	FALSE	TRUE	TRUE	TRUE
AWMETEDTLGR	K	R	FALSE	FALSE	V	11	11	21	2	1	0	NA	Q96NZ9	Q96NZ9	1B		sp|Q96NZ9-1|ENSG00000165828.14|PRAP1|ENST00000433452.5|99490-HCT-15_SNP_RNA-H101R-and-99490-HCT-15_SNP_EXOME-H101R|101r|	PRAP1_p.H101R	101	HCT-15	CAM	FALSE	TRUE	TRUE	TRUE
AYNYIAQEVDDYHAFQTLTHIYNK	R	K	FALSE	FALSE	V	24	28	51	4	3	0	NA	Q9NYU2	Q9NYU2	1B		sp|Q9NYU2-1|ENSG00000136731.12|UGGT1|ENST00000259253.10|21872-HCT-15_SNP_RNA-V558I-and-21872-HCT-15_SNP_EXOME-V558I|558i|	UGGT1_p.V558I	558	HCT-15	CAM	FALSE	TRUE	TRUE	TRUE
DALPELLGLEAGIR	R	R	FALSE	FALSE	R	14	1	14	2	1	0	NA	Q9NSI2	Q9NSI2	1B		sp|Q9NSI2-1|ENSG00000160256.12|FAM207A|ENST00000291634.10|190628-HCT-15_SNP_RNA-S161I-and-190628-HCT-15_SNP_EXOME-S161I|161i|	FAM207A_p.S161I	161	HCT-15	CAM	FALSE	TRUE	TRUE	TRUE
DAMWIGFLTR	K	R	FALSE	FALSE	T	10	1	10	2	1	0	NA	Q13510	Q13510	1B		sp|Q13510-1|ENSG00000104763.18|ASAH1|ENST00000637790.1|85579-HCT-15_SNP_RNA-V246A-and-85579-HCT-15_SNP_EXOME-V246A|246a|	ASAH1_p.V246A	246	HCT-15	CAM	FALSE	TRUE	TRUE	TRUE
DATGLECKPQPLHK	K	K	FALSE	FALSE	T	14	1	14	3	2	0	7C(56.0374)	Q9BXP5	Q9BXP5	1B	412	sp|Q9BXP5-1|ENSG00000087087.19|SRRT|ENST00000611405.4|74711-HCT-15_RARE_RNA-R415Q-and-74711-HCT-15_RARE_EXOME-R415Q,74711-HCT-15_RARE_RNA-A408T-and-74711-HCT-15_RARE_EXOME-A408T|408t415q|	SRRT_p.R415Q,A408T	415408	HCT-15	CAM	TRUE	FALSE	TRUE	TRUE
DDHDPVDKIALQK	F	K	FALSE	FALSE	Y	13	12	24	3	1	0	NA	P22626	P22626	1B		sp|P22626-1|ENSG00000122566.20|HNRNPA2B1|ENST00000354667.8|77381-HCT-15_RARE_EXOME-V170A|170a|	HNRNPA2B1_p.V170A	170	HCT-15	CAM	TRUE	FALSE	FALSE	TRUE
DEDEETAIQRVLQQLTEEAALDEASGFNIPAEQASRPWTQPR	D	R	FALSE	FALSE	G	42	9	50	4	1	0	NA	Q96K21	Q96K21	1B		sp|Q96K21-1|ENSG00000166140.17|ZFYVE19|ENST00000355341.8|138875-HCT-15_SNP_RNA-S376A-and-138875-HCT-15_SNP_EXOME-S376A|376a|	ZFYVE19_p.S376A	376	HCT-15	CAM	FALSE	TRUE	TRUE	TRUE
DEPLHALYDNVEK	R	K	FALSE	FALSE	L	13	8	20	2, 3	9	0	NA	P08243	P08243	1B		sp|P08243-1|ENSG00000070669.16|ASNS|ENST00000175506.8|79376-HCT-15_SNP_RNA-V210E-and-79376-HCT-15_SNP_EXOME-V210E|210e|	ASNS_p.V210E	210	HCT-15	CAM	FALSE	TRUE	TRUE	TRUE
DEVVSPLPSALQGPSC	R	C	FALSE	TRUE	S	16	1	16	2	3	0	16C(56.0374)	Q7L2J0	Q7L2J0	1B	341	sp|Q7L2J0-1|ENSG00000146834.13|MEPCE|ENST00000310512.3|74616-HCT-15_RARE_RNA-G341C-and-74616-HCT-15_RARE_EXOME-G341C|341c|	MEPCE_p.G341C	341	HCT-15	CAM	TRUE	FALSE	TRUE	TRUE
DFAPGSQLPTLLYDSDAK	K	K	FALSE	FALSE	T	18	10	27	2	1	0	NA	O95833	O95833	1B		sp|O95833|ENSG00000169583.12|CLIC3|ENST00000494426.1|95964-HCT-15_RARE_RNA-I64T-and-95964-HCT-15_RARE_EXOME-I64T|64t|	CLIC3_p.I64T	64	HCT-15	CAM	TRUE	FALSE	TRUE	TRUE
DFVSEQLTSLLVNEVQLPALGENK	K	K	FALSE	FALSE	K	24	18	41	2	1	0	NA	P54136	P54136	1B		sp|P54136-1|ENSG00000113643.8|RARS|ENST00000231572.7|57480-HCT-15_RARE_RNA-G182E-and-57480-HCT-15_RARE_EXOME-G182E|182e|	RARS_p.G182E	182	HCT-15	CAM	TRUE	FALSE	TRUE	TRUE
DFVSEQLTSLLVNEVQLPALGENKK	K	K	FALSE	FALSE	V	25	18	42	3	1	0	NA	P54136	P54136	1B		sp|P54136-1|ENSG00000113643.8|RARS|ENST00000231572.7|57480-HCT-15_RARE_RNA-G182E-and-57480-HCT-15_RARE_EXOME-G182E|182e|	RARS_p.G182E	182	HCT-15	CAM	TRUE	FALSE	TRUE	TRUE
DGEDQTQDTELVETMPAGDGTFQK	R	K	FALSE	FALSE	W	24	1	24	2	2	0	NA	P10321	P10321	1B		sp|P10321|ENSG00000204525.16|HLA-C|ENST00000376228.9|68111-HCT-15_SNP_RNA-R258M-and-68111-HCT-15_SNP_EXOME-R258M|258m|	HLA-C_p.R258M	258	HCT-15	CAM	FALSE	TRUE	TRUE	TRUE
DGQELEPQVGEQLLQLWER	R	R	FALSE	FALSE	L	19	1	19	2	3	0	NA	Q9H6S0	Q9H6S0	1B		sp|Q9H6S0|ENSG00000047188.15|YTHDC2|ENST00000161863.8|55633-HCT-15_SNP_RNA-L1409Q-and-55633-HCT-15_SNP_EXOME-L1409Q|1409q|	YTHDC2_p.L1409Q	1409	HCT-15	CAM	FALSE	TRUE	TRUE	TRUE
DLEDLFFK	K	K	FALSE	FALSE	Y	8	5	12	2	3	0	NA	Q13242	Q13242	1B		sp|Q13242|ENSG00000111786.8|SRSF9|ENST00000229390.7|126450-HCT-15_SNP_RNA-Y35F-and-126450-HCT-15_SNP_EXOME-Y35F|35f|	SRSF9_p.Y35F	35	HCT-15	CAM	FALSE	TRUE	TRUE	TRUE
DLGSMSHLTGYETER	K	R	FALSE	FALSE	Q	15	1	15	2	1	0	NA	Q9Y2Z9	Q9Y2Z9	1B		sp|Q9Y2Z9-1|ENSG00000119723.16|COQ6|ENST00000334571.6|132813-HCT-15_SNP_RNA-V406M-and-132813-HCT-15_SNP_EXOME-V406M|406m|	COQ6_p.V406M	406	HCT-15	CAM	FALSE	TRUE	TRUE	TRUE
DLWALVLETMLHGQVMDQK	V	K	FALSE	FALSE	L	19	1	19	5	1	0	NA	Q86XP0	Q86XP0	1B		sp|Q86XP0-1|ENSG00000159337.6|PLA2G4D|ENST00000290472.3|142546-HCT-15_SNP_EXOME-S434T|434t|	PLA2G4D_p.S434T	434	HCT-15	CAM	FALSE	TRUE	FALSE	TRUE
DMAGAQAAAVALNEEFLK	R	K	FALSE	FALSE	N	18	9	26	2	8	0	2M(15.9949)	Q14126	Q14126	1B		sp|Q14126|ENSG00000046604.12|DSG2|ENST00000261590.12|169179-HCT-15_SNP_RNA-R773K-and-169179-HCT-15_SNP_EXOME-R773K|773k|	DSG2_p.R773K	773	HCT-15	CAM	FALSE	TRUE	TRUE	TRUE
DMELPIEK	K	K	FALSE	FALSE	E	8	1	8	2	2	0	NA	P27816	P27816	1B		sp|P27816-1|ENSG00000047849.21|MAP4|ENST00000360240.10|40535-HCT-15_SNP_RNA-T310I-and-40535-HCT-15_SNP_EXOME-T310I|310i|	MAP4_p.T310I	310	HCT-15	CAM	FALSE	TRUE	TRUE	TRUE
DNAGDWADFWR	R	R	FALSE	FALSE	M	11	1	11	2	4	0	NA	Q9UDY2	Q9UDY2	1B		sp|Q9UDY2-1|ENSG00000119139.18|TJP2|ENST00000377245.8|90437-HCT-15_RARE_RNA-R682W-and-90437-HCT-15_RARE_EXOME-R682W|682w|	TJP2_p.R682W	682	HCT-15	CAM	TRUE	FALSE	TRUE	TRUE
DNAMMEYLK	K	K	FALSE	FALSE	L	9	7	15	2	1	0	NA	P15311	P15311	1B		sp|P15311|ENSG00000092820.17|EZR|ENST00000367075.3|71343-HCT-15_RARE_EXOME-L189M|189m|	EZR_p.L189M	189	HCT-15	CAM	TRUE	FALSE	FALSE	TRUE
DPSWIIR	K	R	FALSE	FALSE	-	7	1	7	2	2	0	NA	Q5JRX3	Q5JRX3	1B		sp|Q5JRX3-1|ENSG00000107959.15|PITRM1|ENST00000224949.8|99606-HCT-15_SNP_RNA-Q1037R-and-99606-HCT-15_SNP_EXOME-Q1037R|1037r|	PITRM1_p.Q1037R	1037	HCT-15	CAM	FALSE	TRUE	TRUE	TRUE
DSRPSQAAGDNQGDEVKEQTFSGGTSQDTK	K	K	FALSE	FALSE	A	30	3	32	3	2	0	NA	Q9Y2W1	Q9Y2W1	1B		sp|Q9Y2W1|ENSG00000054118.13|THRAP3|ENST00000354618.9|2173-HCT-15_SNP_RNA-A201V-and-2173-HCT-15_SNP_EXOME-A201V|201v|	THRAP3_p.A201V	201	HCT-15	CAM	FALSE	TRUE	TRUE	TRUE
DTVNPLYDETLR	R	R	FALSE	FALSE	Y	12	10	21	2	1	0	NA	Q96C24	Q96C24	1B		sp|Q96C24-1|ENSG00000102362.15|SYTL4|ENST00000372989.5|201566-HCT-15_SNP_EXOME-I420V|420v|	SYTL4_p.I420V	420	HCT-15	CAM	FALSE	TRUE	FALSE	TRUE
DVGEWQHEEFYR	K	R	FALSE	FALSE	Y	12	17	28	2, 3	7	0	NA	Q12931	Q12931	1B		sp|Q12931-1|ENSG00000126602.10|TRAP1|ENST00000246957.9|151786-HCT-15_SNP_RNA-R307G-and-151786-HCT-15_SNP_EXOME-R307G|307g|	TRAP1_p.R307G	307	HCT-15	CAM	FALSE	TRUE	TRUE	TRUE
EAAGEGPALYEDPPDHK	K	K	FALSE	FALSE	T	17	7	23	3	1	0	NA	P27695	P27695	1B		sp|P27695|ENSG00000100823.11|APEX1|ENST00000555414.5|130585-HCT-15_SNP_RNA-Q51H-and-130585-HCT-15_SNP_EXOME-Q51H|51h|	APEX1_p.Q51H	51	HCT-15	CAM	FALSE	TRUE	TRUE	TRUE
EAGFPPGVVNIITGYGPTAGAAIAQHMDVDK	K	K	FALSE	FALSE	V	31	20	50	3	4	0	NA	P30837	P30837	1B		sp|P30837|ENSG00000137124.7|ALDH1B1|ENST00000377698.3|90100-HCT-15_SNP_RNA-V253M-and-90100-HCT-15_SNP_EXOME-V253M|253m|	ALDH1B1_p.V253M	253	HCT-15	CAM	FALSE	TRUE	TRUE	TRUE
EAGFPPGVVNIITGYGPTAGAAIAQHMDVDKVAFTGSTEVGHLIQK	K	K	FALSE	FALSE	A	46	20	65	5	2	0	NA	P30837	P30837	1B		sp|P30837|ENSG00000137124.7|ALDH1B1|ENST00000377698.3|90100-HCT-15_SNP_RNA-V253M-and-90100-HCT-15_SNP_EXOME-V253M|253m|	ALDH1B1_p.V253M	253	HCT-15	CAM	FALSE	TRUE	TRUE	TRUE
EAGVENFIHVSHLNANIK	K	K	FALSE	FALSE	S	18	13	30	3	1	0	NA	Q16795	Q16795	1B		sp|Q16795|ENSG00000139180.10|NDUFA9|ENST00000266544.9|115728-HCT-15_RARE_RNA-K163N-and-115728-HCT-15_RARE_EXOME-K163N|163n|	NDUFA9_p.K163N	163	HCT-15	CAM	TRUE	FALSE	TRUE	TRUE
EALDVLDAVLK	R	K	FALSE	FALSE	A	11	6	16	2	4	0	NA	Q92552	Q92552	1B		sp|Q92552-1|ENSG00000113048.16|MRPS27|ENST00000261413.9|59502-HCT-15_SNP_RNA-G284D-and-59502-HCT-15_SNP_EXOME-G284D|284d|	MRPS27_p.G284D	284	HCT-15	CAM	FALSE	TRUE	TRUE	TRUE
EALPMDTEVYESPYTDPEEIRPK	R	K	FALSE	FALSE	E	23	7	29	3	2	0	NA	P43405	P43405	1B		sp|P43405-1|ENSG00000165025.14|SYK|ENST00000375754.8|90837-HCT-15_RARE_RNA-A353T-and-90837-HCT-15_RARE_EXOME-A353T|353t|	SYK_p.A353T	353	HCT-15	CAM	TRUE	FALSE	TRUE	TRUE
EAPAGPLEEDDLEPLTLAPTPAPRPPQDLIGLR	K	R	FALSE	FALSE	L	33	9	41	3	5	0	NA	Q92797	Q92797	1B		sp|Q92797-1|ENSG00000125755.18|SYMPK|ENST00000245934.11|183215-HCT-15_RARE_RNA-A1129T-and-183215-HCT-15_RARE_EXOME-A1129T|1129t|	SYMPK_p.A1129T	1129	HCT-15	CAM	TRUE	FALSE	TRUE	TRUE
EDAPVGSLVMTVSAHDEDAGR	K	R	FALSE	FALSE	D	21	1	21	3	1	0	NA	Q14517	Q14517	1B		sp|Q14517|ENSG00000083857.13|FAT1|ENST00000441802.6|53260-HCT-15_SNP_RNA-R1064G-and-53260-HCT-15_SNP_EXOME-R1064G|1064g|	FAT1_p.R1064G	1064	HCT-15	CAM	FALSE	TRUE	TRUE	TRUE
EDQTLALLSQFK	R	K	FALSE	FALSE	S	12	1	12	2	5	0	NA	Q6UX04	Q6UX04	1B		sp|Q6UX04-1|ENSG00000153015.15|CWC27|ENST00000381070.7|54388-HCT-15_RARE_RNA-N390S-and-54388-HCT-15_RARE_EXOME-N390S|390s|	CWC27_p.N390S	390	HCT-15	CAM	TRUE	FALSE	TRUE	TRUE
EDYDGLKEEFRK	K	K	FALSE	FALSE	E	12	7	18	3	1	0	NA	P78417	P78417	1B		sp|P78417-1|ENSG00000148834.12|GSTO1|ENST00000369713.9|98861-HCT-15_SNP_RNA-A140D-and-98861-HCT-15_SNP_EXOME-A140D|140d|	GSTO1_p.A140D	140	HCT-15	CAM	FALSE	TRUE	TRUE	TRUE
EFAGSLGIPFLETSAK	K	K	FALSE	FALSE	N	16	12	27	2	8	0	NA	Q9H0U4	Q9H0U4	1B		sp|Q9H0U4|ENSG00000174903.15|RAB1B|ENST00000311481.10|106330-HCT-15_RARE_RNA-D141G-and-106330-HCT-15_RARE_EXOME-D141G|141g|	RAB1B_p.D141G	141	HCT-15	CAM	TRUE	FALSE	TRUE	TRUE
EFSPFGTITSANVMMEGGR	K	R	FALSE	FALSE	S	19	1	19	2	11	0	14M(15.9949), 15M(15.9949)	Q9H361	Q9H361	1B		sp|Q9H361|ENSG00000151846.8|PABPC3|ENST00000281589.4|127260-HCT-15_RARE_RNA-K324N,127260-HCT-15_RARE_RNA-A313E|313e324n|;sp|P11940-1|ENSG00000070756.15|PABPC1|ENST00000318607.9|87770-HCT-15_RARE_EXOME-K324N|324n|	PABPC3_p.K324N,A313E;PABPC1_p.K324N	324,313;324	HCT-15	CAM	TRUE	FALSE	TRUE	TRUE
EFTAQNLGNLFMAQALQEYNN	K	N	FALSE	FALSE	-	21	21	41	2	2	0	NA	O15372	O15372	1B		sp|O15372|ENSG00000147677.10|EIF3H|ENST00000521861.5|88113-HCT-15_RARE_RNA-K340N-and-88113-HCT-15_RARE_EXOME-K340N|340n|	EIF3H_p.K340N	340	HCT-15	CAM	TRUE	FALSE	TRUE	TRUE
EKDLEDLFFK	R	K	FALSE	FALSE	Y	10	3	12	2	2	0	NA	Q13242	Q13242	1B		sp|Q13242|ENSG00000111786.8|SRSF9|ENST00000229390.7|126450-HCT-15_SNP_RNA-Y35F-and-126450-HCT-15_SNP_EXOME-Y35F|35f|	SRSF9_p.Y35F	35	HCT-15	CAM	FALSE	TRUE	TRUE	TRUE
ELDECFAQANDQMETLDSLIR	R	R	FALSE	FALSE	E	21	1	21	2, 3	5	0	5C(56.0374)	P15924	P15924	1B	110	sp|P15924-1|ENSG00000096696.13|DSP|ENST00000379802.7|62914-HCT-15_RARE_RNA-I120T-and-62914-HCT-15_RARE_EXOME-I120T|120t|	DSP_p.I120T	120	HCT-15	CAM	TRUE	FALSE	TRUE	TRUE
ELEIMQILTR	K	R	FALSE	FALSE	V	10	20	29	2	1	0	NA	P55210	P55210	1B		sp|P55210-1|ENSG00000165806.19|CASP7|ENST00000621345.4|99029-HCT-15_SNP_RNA-D255E-and-99029-HCT-15_SNP_EXOME-D255E|255e|	CASP7_p.D255E	255	HCT-15	CAM	FALSE	TRUE	TRUE	TRUE
ELSGLPSGPSAGSGPPPPPPGPPPPPVSTSSGSDESASR	K	R	FALSE	FALSE	S	39	1	39	3	4	0	NA	Q01518	Q01518	1B		sp|Q01518-1|ENSG00000131236.16|CAP1|ENST00000372797.7|2315-HCT-15_RARE_RNA-C229G-and-2315-HCT-15_RARE_EXOME-C229G,2315-HCT-15_RARE_RNA-C236G-and-2315-HCT-15_RARE_EXOME-C236G,2315-HCT-15_RARE_EXOME-I245S,2315-HCT-15_RARE_EXOME-C247G,2315-HCT-15_RARE_EXOME-Y249D|229g236g245s247g249d|	CAP1_p.C229G,C236G,I245S,C247G,Y249D	229236245247249	HCT-15	CAM	TRUE	FALSE	TRUE	TRUE
EMILIPEGDVNSAK	R	K	FALSE	FALSE	V	14	1	14	2	2	0	NA	Q9NTZ6	Q9NTZ6	1B		sp|Q9NTZ6|ENSG00000244462.7|RBM12|ENST00000374114.7|188470-HCT-15_RARE_RNA-N534I-and-188470-HCT-15_RARE_EXOME-N534I|534i|	RBM12_p.N534I	534	HCT-15	CAM	TRUE	FALSE	TRUE	TRUE
ENSHFFVATFAR	K	R	FALSE	FALSE	E	12	11	22	3	1	0	NA	Q15814	Q15814	1B		sp|Q15814|ENSG00000124659.6|TBCC|ENST00000372876.1|69012-HCT-15_SNP_RNA-V65A-and-69012-HCT-15_SNP_EXOME-V65A|65a|	TBCC_p.V65A	65	HCT-15	CAM	FALSE	TRUE	TRUE	TRUE
EPWLLPSQHNDIIQDALGQR	R	R	FALSE	FALSE	Y	20	13	32	2, 3	7	0	NA	Q14697	Q14697	1B		sp|Q14697-1|ENSG00000089597.16|GANAB|ENST00000356638.7|112080-HCT-15_SNP_RNA-R698Q-and-112080-HCT-15_SNP_EXOME-R698Q|698q|	GANAB_p.R698Q	698	HCT-15	CAM	FALSE	TRUE	TRUE	TRUE
EPWVEQEGPEYWDR	R	R	FALSE	FALSE	E	14	1	14	2	1	0	NA	P10321	P10321	1B		sp|P10321|ENSG00000204525.16|HLA-C|ENST00000376228.9|68111-HCT-15_SNP_RNA-A73E-and-68111-HCT-15_SNP_EXOME-A73E|73e|	HLA-C_p.A73E	73	HCT-15	CAM	FALSE	TRUE	TRUE	TRUE
EPWVEQEGPEYWDRETQK	R	K	FALSE	FALSE	Y	18	1	18	3	1	0	NA	P10321	P10321	1B		sp|P10321|ENSG00000204525.16|HLA-C|ENST00000376228.9|68111-HCT-15_SNP_RNA-A73E-and-68111-HCT-15_SNP_EXOME-A73E|73e|	HLA-C_p.A73E	73	HCT-15	CAM	FALSE	TRUE	TRUE	TRUE
EQDLQLEELRQPVSTLK	R	K	FALSE	FALSE	C	17	3	19	3	3	0	NA	O60763	O60763	1B		sp|O60763-1|ENSG00000138768.14|USO1|ENST00000514213.6|47074-HCT-15_RARE_RNA-Q672P-and-47074-HCT-15_RARE_EXOME-Q672P|672p|	USO1_p.Q672P	672	HCT-15	CAM	TRUE	FALSE	TRUE	TRUE
EQLQQEQALLEEIER	R	R	FALSE	FALSE	H	15	1	15	2	10	0	NA	Q15149	Q15149	1B		sp|Q15149-1|ENSG00000178209.14|PLEC|ENST00000322810.8|89058-HCT-15_SNP_RNA-R1386Q-and-89058-HCT-15_SNP_EXOME-R1386Q|1386q|	PLEC_p.R1386Q	1386	HCT-15	CAM	FALSE	TRUE	TRUE	TRUE
ESFADILPEAAALVK	R	K	FALSE	FALSE	D	15	1	15	2	2	0	NA	Q5VT52	Q5VT52	1B		sp|Q5VT52-1|ENSG00000163125.15|RPRD2|ENST00000369068.4|5515-HCT-15_SNP_RNA-V103I-and-5515-HCT-15_SNP_EXOME-V103I|103i|	RPRD2_p.V103I	103	HCT-15	CAM	FALSE	TRUE	TRUE	TRUE
ESFADILPEAAALVKDPSVSK	R	K	FALSE	FALSE	S	21	1	21	3	3	0	NA	Q5VT52	Q5VT52	1B		sp|Q5VT52-1|ENSG00000163125.15|RPRD2|ENST00000369068.4|5515-HCT-15_SNP_RNA-V103I-and-5515-HCT-15_SNP_EXOME-V103I|103i|	RPRD2_p.V103I	103	HCT-15	CAM	FALSE	TRUE	TRUE	TRUE
ESLLSSDSLSQVFLHLSTLDR	R	R	FALSE	FALSE	S	21	5	25	3	1	0	NA	Q9NRL2	Q9NRL2	1B		sp|Q9NRL2-1|ENSG00000198604.10|BAZ1A|ENST00000382422.6|135486-HCT-15_RARE_RNA-A1124D-and-135486-HCT-15_RARE_EXOME-A1124D|1124d|	BAZ1A_p.A1124D	1124	HCT-15	CAM	TRUE	FALSE	TRUE	TRUE
ETFLDPFILR	K	R	FALSE	FALSE	D	10	1	10	2	2	0	NA	P23470	P23470	1B		sp|P23470-1|ENSG00000144724.19|PTPRG|ENST00000474889.5|35379-HCT-15_SNP_RNA-V237I-and-35379-HCT-15_SNP_EXOME-V237I|237i|	PTPRG_p.V237I	237	HCT-15	CAM	FALSE	TRUE	TRUE	TRUE
ETNNAVIIMK	K	K	FALSE	FALSE	L	10	6	15	2	1	0	NA	P60983	P60983	1B		sp|P60983|ENSG00000197045.12|GMFB|ENST00000358056.7|135975-HCT-15_RARE_RNA-A31V-and-135975-HCT-15_RARE_EXOME-A31V|31v|	GMFB_p.A31V	31	HCT-15	CAM	TRUE	FALSE	TRUE	TRUE
EVAQQAVDADVHAVGVSTLAAGHK	R	K	FALSE	FALSE	T	24	1	24	4	1	0	NA	P22033	P22033	1B		sp|P22033|ENSG00000146085.7|MUT|ENST00000274813.3|69201-HCT-15_SNP_RNA-I671V-and-69201-HCT-15_SNP_EXOME-I671V|671v|	MUT_p.I671V	671	HCT-15	CAM	FALSE	TRUE	TRUE	TRUE
EVSSSFDQVIK	K	K	FALSE	FALSE	E	11	1	11	2	2	0	NA	Q9Y6C9	Q9Y6C9	1B		sp|Q9Y6C9|ENSG00000109919.9|MTCH2|ENST00000302503.7|111432-HCT-15_SNP_RNA-H119Q-and-111432-HCT-15_SNP_EXOME-H119Q|119q|	MTCH2_p.H119Q	119	HCT-15	CAM	FALSE	TRUE	TRUE	TRUE
EVTVNVLSPR	R	R	FALSE	FALSE	Y	10	11	20	2	2	0	NA	P05362	P05362	1B		sp|P05362|ENSG00000090339.8|ICAM1|ENST00000264832.7|173403-HCT-15_SNP_RNA-K469E-and-173403-HCT-15_SNP_EXOME-K469E|469e|	ICAM1_p.K469E	469	HCT-15	CAM	FALSE	TRUE	TRUE	TRUE
EWSLELSPAQNWTPPQPR	R	R	FALSE	FALSE	T	18	11	28	2	1	0	NA	Q8N6T3	Q8N6T3	1B		sp|Q8N6T3-1|ENSG00000101199.12|ARFGAP1|ENST00000370283.8|187237-HCT-15_SNP_RNA-S128L-and-187237-HCT-15_SNP_EXOME-S128L|128l|	ARFGAP1_p.S128L	128	HCT-15	CAM	FALSE	TRUE	TRUE	TRUE
FAEAFEDIPR	K	R	FALSE	FALSE	A	10	22	31	2	10	0	NA	P50990	P50990	1B		sp|P50990-1|ENSG00000156261.12|CCT8|ENST00000286788.8|191141-HCT-15_RARE_RNA-A447D-and-191141-HCT-15_RARE_EXOME-A447D|447d|	CCT8_p.A447D	447	HCT-15	CAM	TRUE	FALSE	TRUE	TRUE
FAGGDYTTTIESFISASGR	K	R	FALSE	FALSE	A	19	1	19	2	2	0	NA	P07814	P07814	1B		sp|P07814|ENSG00000136628.17|EPRS|ENST00000366923.7|17120-HCT-15_RARE_RNA-A1227S-and-17120-HCT-15_RARE_EXOME-A1227S|1227s|	EPRS_p.A1227S	1227	HCT-15	CAM	TRUE	FALSE	TRUE	TRUE
FASEIAGVDELGTTGR	R	R	FALSE	FALSE	G	16	6	21	2	1	0	NA	P28331	P28331	1B		sp|P28331-1|ENSG00000023228.13|NDUFS1|ENST00000449699.5|31574-HCT-15_RARE_RNA-D194E-and-31574-HCT-15_RARE_EXOME-D194E|194e|	NDUFS1_p.D194E	194	HCT-15	CAM	TRUE	FALSE	TRUE	TRUE
FFDANYDGKDYDHVAAR	K	R	FALSE	FALSE	Q	17	1	17	4	1	0	NA	Q15691	Q15691	1B		sp|Q15691|ENSG00000101367.8|MAPRE1|ENST00000375571.5|185898-HCT-15_RARE_RNA-P126H-and-185898-HCT-15_RARE_EXOME-P126H|126h|	MAPRE1_p.P126H	126	HCT-15	CAM	TRUE	FALSE	TRUE	TRUE
FGGGNPELLTHMVSK	R	K	FALSE	FALSE	G	15	8	22	2, 3	6	0	NA	P40939	P40939	1B		sp|P40939-1|ENSG00000084754.11|HADHA|ENST00000380649.7|26387-HCT-15_RARE_RNA-Q621H-and-26387-HCT-15_RARE_EXOME-Q621H|621h|	HADHA_p.Q621H	621	HCT-15	CAM	TRUE	FALSE	TRUE	TRUE
FGYYGDALR	R	R	FALSE	FALSE	Q	9	1	9	2	1	0	NA	P07942	P07942	1B		sp|P07942|ENSG00000091136.13|LAMB1|ENST00000222399.10|80038-HCT-15_SNP_RNA-Q1022R-and-80038-HCT-15_SNP_EXOME-Q1022R|1022r|	LAMB1_p.Q1022R	1022	HCT-15	CAM	FALSE	TRUE	TRUE	TRUE
FIIHVPPGEFNEVFNDVR	K	R	FALSE	FALSE	L	18	7	24	2, 3	9	0	NA	P47755	P47755	1B		sp|P47755-1|ENSG00000198898.13|CAPZA2|ENST00000361183.7|75174-HCT-15_RARE_RNA-A24V-and-75174-HCT-15_RARE_EXOME-A24V|24v|	CAPZA2_p.A24V	24	HCT-15	CAM	TRUE	FALSE	TRUE	TRUE
FIQENVFVAANHNASPLSIK	R	K	FALSE	FALSE	E	20	6	25	3	2	0	NA	P11172	P11172	1B		sp|P11172-1|ENSG00000114491.13|UMPS|ENST00000232607.6|36507-HCT-15_SNP_RNA-G213A-and-36507-HCT-15_SNP_EXOME-G213A|213a|	UMPS_p.G213A	213	HCT-15	CAM	FALSE	TRUE	TRUE	TRUE
FLSSSPHLPPSSYFNANGR	K	R	FALSE	FALSE	A	19	13	31	3	2	0	NA	O14773	O14773	1B		sp|O14773-1|ENSG00000166340.16|TPP1|ENST00000299427.11|109975-HCT-15_RARE_RNA-S445N-and-109975-HCT-15_RARE_EXOME-S445N|445n|	TPP1_p.S445N	445	HCT-15	CAM	TRUE	FALSE	TRUE	TRUE
FNLSQESSYIATQYSLRPR	K	R	FALSE	FALSE	R	19	8	26	3	3	0	NA	Q14739	Q14739	1B		sp|Q14739|ENSG00000143815.14|LBR|ENST00000272163.8|17298-HCT-15_SNP_RNA-S154N-and-17298-HCT-15_SNP_EXOME-S154N|154n|	LBR_p.S154N	154	HCT-15	CAM	FALSE	TRUE	TRUE	TRUE
FQTIDIEPDIEALLSQGLSCA	R	A	FALSE	FALSE	-	21	8	28	2	2	0	20C(56.0374)	P07203	P07203	1B	202	sp|P07203-1|ENSG00000233276.4|GPX1|ENST00000419783.2|40904-HCT-15_SNP_RNA-P200L-and-40904-HCT-15_SNP_EXOME-P200L|200l|	GPX1_p.P200L	200	HCT-15	CAM	FALSE	TRUE	TRUE	TRUE
FTTLEGMLK	K	K	FALSE	FALSE	D	9	26	34	2	2	0	NA	O75312	O75312	1B		sp|O75312|ENSG00000109917.10|ZPR1|ENST00000227322.7|114665-HCT-15_RARE_RNA-L357M-and-114665-HCT-15_RARE_EXOME-L357M|357m|	ZPR1_p.L357M	357	HCT-15	CAM	TRUE	FALSE	TRUE	TRUE
FTVGDHSR	K	R	FALSE	FALSE	F	8	5	12	2	4	0	NA	O75083	O75083	1B		sp|O75083-1|ENSG00000071127.16|WDR1|ENST00000499869.6|49631-HCT-15_SNP_EXOME-I185V|185v|	WDR1_p.I185V	185	HCT-15	CAM	FALSE	TRUE	FALSE	TRUE
GAAPTPPGTTGPSAAQAGK	K	K	FALSE	FALSE	Q	19	8	26	2	1	0	NA	Q13428	Q13428	1B		sp|Q13428-1|ENSG00000070814.18|TCOF1|ENST00000377797.7|57019-HCT-15_RARE_RNA-K918T-and-57019-HCT-15_RARE_EXOME-K918T|918t|	TCOF1_p.K918T	918	HCT-15	CAM	TRUE	FALSE	TRUE	TRUE
GATVLPANTPC	R	C	FALSE	TRUE	N	11	6	16	2	2	0	11C(56.0374)	P22059	P22059	1B	334	sp|P22059|ENSG00000110048.11|OSBP|ENST00000263847.5|111772-HCT-15_RARE_RNA-G334C-and-111772-HCT-15_RARE_EXOME-G334C|334c|	OSBP_p.G334C	334	HCT-15	CAM	TRUE	FALSE	TRUE	TRUE
GDYIGSTYFER	R	R	FALSE	FALSE	C	11	6	16	2	4	0	NA	P61081	P61081	1B		sp|P61081|ENSG00000130725.7|UBE2M|ENST00000253023.7|185046-HCT-15_RARE_RNA-G171D-and-185046-HCT-15_RARE_EXOME-G171D|171d|	UBE2M_p.G171D	171	HCT-15	CAM	TRUE	FALSE	TRUE	TRUE
GEWQHEEFYR	V	R	FALSE	FALSE	Y	10	19	28	2	1	0	NA	Q12931	Q12931	1B		sp|Q12931-1|ENSG00000126602.10|TRAP1|ENST00000246957.9|151786-HCT-15_SNP_RNA-R307G-and-151786-HCT-15_SNP_EXOME-R307G|307g|	TRAP1_p.R307G	307	HCT-15	CAM	FALSE	TRUE	TRUE	TRUE
GFGFVTFDDHDPVDKIAL	R	L	FALSE	FALSE	Q	18	5	22	3	1	0	NA	P22626	P22626	1B		sp|P22626-1|ENSG00000122566.20|HNRNPA2B1|ENST00000354667.8|77381-HCT-15_RARE_EXOME-V170A|170a|	HNRNPA2B1_p.V170A	170	HCT-15	CAM	TRUE	FALSE	FALSE	TRUE
GFGFVTFDDHDPVDKIALQK	R	K	FALSE	FALSE	Y	20	5	24	3, 4	8	0	NA	P22626	P22626	1B		sp|P22626-1|ENSG00000122566.20|HNRNPA2B1|ENST00000354667.8|77381-HCT-15_RARE_EXOME-V170A|170a|	HNRNPA2B1_p.V170A	170	HCT-15	CAM	TRUE	FALSE	FALSE	TRUE
GFGTDEQAIVDVVANCSNDQR	K	R	FALSE	FALSE	Q	21	7	27	3	8	0	16C(56.0374)	P20073	P20073	1B	215	sp|P20073-1|ENSG00000138279.15|ANXA7|ENST00000372919.8|101160-HCT-15_RARE_RNA-R215C-and-101160-HCT-15_RARE_EXOME-R215C|215c|	ANXA7_p.R215C	215	HCT-15	CAM	TRUE	FALSE	TRUE	TRUE
GFTTAGVLAAHK	K	K	FALSE	FALSE	L	12	18	29	2	4	0	NA	P32322	P32322	1B		sp|P32322-1|ENSG00000183010.16|PYCR1|ENST00000619204.4|168184-HCT-15_RARE_EXOME-A21T|21t|	PYCR1_p.A21T	21	HCT-15	CAM	TRUE	FALSE	FALSE	TRUE
GGNPSTPIQVR	C	R	TRUE	FALSE	C	11	21	31	2	1	0	NA	Q99829	Q99829	1B		sp|Q99829|ENSG00000214078.12|CPNE1|ENST00000352393.8|188439-HCT-15_SNP_EXOME-Q211R|211r|	CPNE1_p.Q211R	211	HCT-15	CAM	FALSE	TRUE	FALSE	TRUE
GGSYSQAASSDSAQGSDVSLTAC	K	C	FALSE	TRUE	K	23	10	32	2	2	0	23C(56.0374)	P04439	P04439	1B	363	sp|P04439|ENSG00000206503.12|HLA-A|ENST00000396634.5|63676-HCT-15_SNP_EXOME-T345S|345s|	HLA-A_p.T345S	345	HCT-15	CAM	FALSE	TRUE	FALSE	TRUE
GIIDLIEER	K	R	FALSE	FALSE	A	9	22	30	2	5	0	NA	Q96RP9	Q96RP9	1B		sp|Q96RP9-1|ENSG00000168827.14|GFM1|ENST00000486715.5|37581-HCT-15_SNP_RNA-V215I-and-37581-HCT-15_SNP_EXOME-V215I|215i|	GFM1_p.V215I	215	HCT-15	CAM	FALSE	TRUE	TRUE	TRUE
GISEDSHLESLQDVGQSAAPTFMISPETITGTGK	K	K	FALSE	FALSE	K	34	12	45	3	17	0	23M(15.9949)	P27816	P27816	1B		sp|P27816-1|ENSG00000047849.21|MAP4|ENST00000360240.10|40535-HCT-15_SNP_EXOME-V628I|628i|	MAP4_p.V628I	628	HCT-15	CAM	FALSE	TRUE	FALSE	TRUE
GISEDSHLESLQDVGQSAAPTFMISPETITGTGKK	K	K	FALSE	FALSE	C	35	12	46	4	2	0	NA	P27816	P27816	1B		sp|P27816-1|ENSG00000047849.21|MAP4|ENST00000360240.10|40535-HCT-15_SNP_EXOME-V628I|628i|	MAP4_p.V628I	628	HCT-15	CAM	FALSE	TRUE	FALSE	TRUE
GISFDAAATSGGSASSEK	R	K	FALSE	FALSE	A	18	8	25	2	3	0	NA	P13804	P13804	1B		sp|P13804-1|ENSG00000140374.15|ETFA|ENST00000557943.5|144492-HCT-15_SNP_RNA-T171I-and-144492-HCT-15_SNP_EXOME-T171I|171i|	ETFA_p.T171I	171	HCT-15	CAM	FALSE	TRUE	TRUE	TRUE
GIYEETTTGVHNLYK	R	K	FALSE	FALSE	M	15	12	26	3	1	0	NA	P23526	P23526	1B		sp|P23526-1|ENSG00000101444.12|AHCY|ENST00000217426.6|188297-HCT-15_RARE_RNA-S154Y-and-188297-HCT-15_RARE_EXOME-S154Y|154y|	AHCY_p.S154Y	154	HCT-15	CAM	TRUE	FALSE	TRUE	TRUE
GLDPALGGETLASR	K	R	FALSE	FALSE	Q	14	13	26	2	2	0	NA	Q9Y448	Q9Y448	1B		sp|Q9Y448-1|ENSG00000128944.13|KNSTRN|ENST00000249776.12|138802-HCT-15_SNP_EXOME-S232G|232g|	KNSTRN_p.S232G	232	HCT-15	CAM	FALSE	TRUE	FALSE	TRUE
GLSGAQDPFPGPAPVPVEVVQK	R	K	FALSE	FALSE	F	22	9	30	2	6	0	NA	O15213	O15213	1B		sp|O15213|ENSG00000227057.9|WDR46|ENST00000374617.8|68549-HCT-15_SNP_EXOME-T94A|94a|	WDR46_p.T94A	94	HCT-15	CAM	FALSE	TRUE	FALSE	TRUE
GLVEPVNMVDNGDGTHTVTYTPSQEGPYMVSVK	R	K	FALSE	FALSE	Y	33	1	33	3	18	0	29M(15.9949), 8M(15.9949)	O75369	O75369	1B		sp|O75369-1|ENSG00000136068.14|FLNB|ENST00000295956.8|35308-HCT-15_SNP_RNA-V1471M-and-35308-HCT-15_SNP_EXOME-V1471M|1471m|	FLNB_p.V1471M	1471	HCT-15	CAM	FALSE	TRUE	TRUE	TRUE
GNTISHIIK	R	K	FALSE	FALSE	L	9	1	9	2	3	0	NA	Q06203	Q06203	1B		sp|Q06203|ENSG00000128059.8|PPAT|ENST00000264220.6|50419-HCT-15_RARE_RNA-P400H-and-50419-HCT-15_RARE_EXOME-P400H|400h|	PPAT_p.P400H	400	HCT-15	CAM	TRUE	FALSE	TRUE	TRUE
GPGAGEGPGGAFAR	K	R	FALSE	FALSE	V	14	1	14	2	1	0	NA	A8K0Z3	A8K0Z3	1B		sp|A8K0Z3|ENSG00000181404.16|WASHC1|ENST00000442898.4|92780-HCT-15_SNP_RNA-V439A-and-92780-HCT-15_SNP_EXOME-V439A|439a|	WASHC1_p.V439A	439	HCT-15	CAM	FALSE	TRUE	TRUE	TRUE
GQELAFPLSPDWQVDYELYTWR	R	R	FALSE	FALSE	K	22	1	22	2	1	0	NA	P26641	P26641	1B		sp|P26641-1|ENSG00000254772.9|EEF1G|ENST00000329251.4|112031-HCT-15_RARE_RNA-S396L-and-112031-HCT-15_RARE_EXOME-S396L|396l|	EEF1G_p.S396L	396	HCT-15	CAM	TRUE	FALSE	TRUE	TRUE
GSGLGGLTDKLTQAQIFDYSEIPNFPR	C	R	TRUE	FALSE	S	27	10	36	3	1	0	NA	P00491	P00491	1B		sp|P00491|ENSG00000198805.11|PNP|ENST00000361505.9|130606-HCT-15_SNP_RNA-G51S-and-130606-HCT-15_SNP_EXOME-G51S|51s|	PNP_p.G51S	51	HCT-15	CAM	FALSE	TRUE	TRUE	TRUE
GSMPAYSGNNMDKSDSELNNEVAAR	R	R	FALSE	FALSE	K	25	3	27	3	1	0	NA	Q53TN4	Q53TN4	1B		sp|Q53TN4-1|ENSG00000071967.11|CYBRD1|ENST00000321348.8|22859-HCT-15_SNP_RNA-S266N-and-22859-HCT-15_SNP_EXOME-S266N|266n|	CYBRD1_p.S266N	266	HCT-15	CAM	FALSE	TRUE	TRUE	TRUE
GSSAQEAASGVALGEAPDHSYESLR	T	R	FALSE	FALSE	V	25	20	44	3	1	0	NA	Q13011	Q13011	1B		sp|Q13011|ENSG00000104823.8|ECH1|ENST00000221418.8|182284-HCT-15_SNP_RNA-E41A-and-182284-HCT-15_SNP_EXOME-E41A|41a|	ECH1_p.E41A	41	HCT-15	CAM	FALSE	TRUE	TRUE	TRUE
GVVPLAGTNGETTIQGLDGLSER	K	R	FALSE	FALSE	C	23	6	28	2, 3	15	0	NA	P04075	P04075	1B		sp|P04075-1|ENSG00000149925.18|ALDOA|ENST00000569545.5|147948-HCT-15_RARE_EXOME-T125I|125i|	ALDOA_p.T125I	125	HCT-15	CAM	TRUE	FALSE	FALSE	TRUE
HASSGSFLSSANEHLK	R	K	FALSE	FALSE	E	16	7	22	3	3	0	NA	O76003	O76003	1B		sp|O76003|ENSG00000108010.11|GLRX3|ENST00000331244.9|99420-HCT-15_SNP_RNA-P123S-and-99420-HCT-15_SNP_EXOME-P123S|123s|	GLRX3_p.P123S	123	HCT-15	CAM	FALSE	TRUE	TRUE	TRUE
HASSGSFLSSANEHLKEDLNLR	R	R	FALSE	FALSE	L	22	7	28	4	1	0	NA	O76003	O76003	1B		sp|O76003|ENSG00000108010.11|GLRX3|ENST00000331244.9|99420-HCT-15_SNP_RNA-P123S-and-99420-HCT-15_SNP_EXOME-P123S|123s|	GLRX3_p.P123S	123	HCT-15	CAM	FALSE	TRUE	TRUE	TRUE
HFTAQGLPDLNHSQVYAVK	K	K	FALSE	FALSE	T	19	1	19	3	2	0	NA	Q92900	Q92900	1B		sp|Q92900-1|ENSG00000005007.12|UPF1|ENST00000599848.5|174650-HCT-15_RARE_RNA-R473H-and-174650-HCT-15_RARE_EXOME-R473H|473h|	UPF1_p.R473H	473	HCT-15	CAM	TRUE	FALSE	TRUE	TRUE
HGYFDEEMNR	R	R	FALSE	FALSE	V	10	1	10	2	4	0	NA	Q15149	Q15149	1B		sp|Q15149-1|ENSG00000178209.14|PLEC|ENST00000322810.8|89058-HCT-15_SNP_RNA-R2969H-and-89058-HCT-15_SNP_EXOME-R2969H|2969h|	PLEC_p.R2969H	2969	HCT-15	CAM	FALSE	TRUE	TRUE	TRUE
HNVEVLGILSDDVETDNVAPGENLK	K	K	FALSE	FALSE	L	25	13	37	3	1	0	NA	P15170	P15170	1B		sp|P15170-1|ENSG00000103342.12|GSPT1|ENST00000563468.5|152278-HCT-15_RARE_RNA-T355N-and-152278-HCT-15_RARE_EXOME-T355N|355n|	GSPT1_p.T355N	355	HCT-15	CAM	TRUE	FALSE	TRUE	TRUE
HTLSFVDVGTGK	K	K	FALSE	FALSE	V	12	1	12	2	1	0	NA	P31040	P31040	1B		sp|P31040-1|ENSG00000073578.16|SDHA|ENST00000264932.10|53319-HCT-15_RARE_RNA-Y629F-and-53319-HCT-15_RARE_EXOME-Y629F|629f|	SDHA_p.Y629F	629	HCT-15	CAM	TRUE	FALSE	TRUE	TRUE
IATSPASQLSPTELTEMR	F	R	FALSE	FALSE	N	18	1	18	2	8	0	NA	Q9NYK5	Q9NYK5	1B		sp|Q9NYK5-1|ENSG00000154719.13|MRPL39|ENST00000352957.8|191066-HCT-15_SNP_RNA-S31P-and-191066-HCT-15_SNP_EXOME-S31P|31p|	MRPL39_p.S31P	31	HCT-15	CAM	FALSE	TRUE	TRUE	TRUE
ICIDSLSAQLSQLQK	R	K	FALSE	FALSE	Q	15	1	15	2	2	0	2C(56.0374)	P02545	P02545	1B	298	sp|P02545-1|ENSG00000160789.19|LMNA|ENST00000368300.8|6152-HCT-15_RARE_RNA-R298C-and-6152-HCT-15_RARE_EXOME-R298C|298c|	LMNA_p.R298C	298	HCT-15	CAM	TRUE	FALSE	TRUE	TRUE
IDAAQNWFADPNGGPEGEEQIR	K	R	FALSE	FALSE	G	22	9	30	2	1	0	NA	P18206	P18206	1B		sp|P18206-1|ENSG00000035403.17|VCL|ENST00000211998.9|97891-HCT-15_RARE_EXOME-L395F|395f|	VCL_p.L395F	395	HCT-15	CAM	TRUE	FALSE	FALSE	TRUE
IEPDRAQVDEVLQLR	R	R	FALSE	FALSE	E	15	1	15	3	1	0	NA	O60437	O60437	1B		sp|O60437|ENSG00000118898.15|PPL|ENST00000345988.6|152024-HCT-15_SNP_RNA-A1007V-and-152024-HCT-15_SNP_EXOME-A1007V|1007v|	PPL_p.A1007V	1007	HCT-15	CAM	FALSE	TRUE	TRUE	TRUE
IFEEDPAVGAIVLTGGDK	K	K	FALSE	FALSE	A	18	1	18	2	21	0	NA	P30084	P30084	1B		sp|P30084|ENSG00000127884.4|ECHS1|ENST00000368547.3|102799-HCT-15_SNP_RNA-T75I-and-102799-HCT-15_SNP_EXOME-T75I|75i|	ECHS1_p.T75I	75	HCT-15	CAM	FALSE	TRUE	TRUE	TRUE
IFEEDPAVGAIVLTGGDKAFAAGADIK	K	K	FALSE	FALSE	E	27	1	27	3	9	0	NA	P30084	P30084	1B		sp|P30084|ENSG00000127884.4|ECHS1|ENST00000368547.3|102799-HCT-15_SNP_RNA-T75I-and-102799-HCT-15_SNP_EXOME-T75I|75i|	ECHS1_p.T75I	75	HCT-15	CAM	FALSE	TRUE	TRUE	TRUE
IGGTNIGEDIR	C	R	TRUE	FALSE	K	11	27	37	2	1	0	NA	P38919	P38919	1B		sp|P38919|ENSG00000141543.9|EIF4A3|ENST00000269349.7|167882-HCT-15_RARE_RNA-V146I-and-167882-HCT-15_RARE_EXOME-V146I|146i|	EIF4A3_p.V146I	146	HCT-15	CAM	TRUE	FALSE	TRUE	TRUE
IIGLDQVAGMSETALLGAFK	R	K	FALSE	FALSE	T	20	1	20	2	1	0	NA	P35579	P35579	1B		sp|P35579-1|ENSG00000100345.21|MYH9|ENST00000216181.10|195651-HCT-15_RARE_RNA-P633L-and-195651-HCT-15_RARE_EXOME-P633L|633l|	MYH9_p.P633L	633	HCT-15	CAM	TRUE	FALSE	TRUE	TRUE
IIVDANNLTVEIENELNIIHK	R	K	FALSE	FALSE	F	21	18	38	3	3	0	NA	Q8WWY3	Q8WWY3	1B		sp|Q8WWY3-1|ENSG00000105618.13|PRPF31|ENST00000321030.8|177991-HCT-15_RARE_RNA-V92I-and-177991-HCT-15_RARE_EXOME-V92I|92i|	PRPF31_p.V92I	92	HCT-15	CAM	TRUE	FALSE	TRUE	TRUE
ILAAQGQVSAQGGAQPSVEAPAAPRPTATQLTR	K	R	FALSE	FALSE	D	33	9	41	3	1	0	NA	Q9H936	Q9H936	1B		sp|Q9H936|ENSG00000177542.10|SLC25A22|ENST00000320230.9|109391-HCT-15_SNP_RNA-L150V-and-109391-HCT-15_SNP_EXOME-L150V|150v|	SLC25A22_p.L150V	150	HCT-15	CAM	FALSE	TRUE	TRUE	TRUE
ILLQDVGGGSWAELGR	C	R	TRUE	FALSE	T	16	1	16	2	2	0	NA	Q99829	Q99829	1B		sp|Q99829|ENSG00000214078.12|CPNE1|ENST00000352393.8|188439-HCT-15_SNP_RNA-V31I-and-188439-HCT-15_SNP_EXOME-V31I|31i|	CPNE1_p.V31I	31	HCT-15	CAM	FALSE	TRUE	TRUE	TRUE
IMQDQSEGNSLQNQALQTLQER	R	R	FALSE	FALSE	L	22	5	26	2	4	0	2M(15.9949)	Q8TBA6	Q8TBA6	1B		sp|Q8TBA6-1|ENSG00000066455.12|GOLGA5|ENST00000163416.6|133396-HCT-15_SNP_RNA-F350L-and-133396-HCT-15_SNP_EXOME-F350L|350l|	GOLGA5_p.F350L	350	HCT-15	CAM	FALSE	TRUE	TRUE	TRUE
IMTTGFSR	K	R	FALSE	FALSE	M	8	11	18	2	1	0	NA	P31146	P31146	1B		sp|P31146|ENSG00000102879.15|CORO1A|ENST00000219150.9|147986-HCT-15_RARE_RNA-L235M-and-147986-HCT-15_RARE_EXOME-L235M|235m|	CORO1A_p.L235M	235	HCT-15	CAM	TRUE	FALSE	TRUE	TRUE
INAGMYILSPAVLR	K	R	FALSE	FALSE	R	14	11	24	2	3	0	5M(15.9949)	Q9Y5P6	Q9Y5P6	1B		sp|Q9Y5P6-1|ENSG00000173540.12|GMPPB|ENST00000480687.5|41018-HCT-15_SNP_RNA-Q184R-and-41018-HCT-15_SNP_EXOME-Q184R|184r|	GMPPB_p.Q184R	184	HCT-15	CAM	FALSE	TRUE	TRUE	TRUE
IQPEDMFVYDINEK	R	K	FALSE	FALSE	D	14	1	14	2	3	0	NA	Q96GX9	Q96GX9	1B		sp|Q96GX9-1|ENSG00000149089.12|APIP|ENST00000395787.3|111040-HCT-15_SNP_RNA-C76Y-and-111040-HCT-15_SNP_EXOME-C76Y|76y|	APIP_p.C76Y	76	HCT-15	CAM	FALSE	TRUE	TRUE	TRUE
ISYGPDWKDFYVVEPLAFEGTPEQK	R	K	FALSE	FALSE	A	25	3	27	3	5	0	NA	P06865	P06865	1B		sp|P06865-1|ENSG00000213614.9|HEXA|ENST00000268097.9|144124-HCT-15_SNP_RNA-I436V-and-144124-HCT-15_SNP_EXOME-I436V|436v|	HEXA_p.I436V	436	HCT-15	CAM	FALSE	TRUE	TRUE	TRUE
ITDAYLDQYLR	K	R	FALSE	FALSE	Y	11	27	37	2	3	0	NA	Q6P2Q9	Q6P2Q9	1B		sp|Q6P2Q9|ENSG00000174231.16|PRPF8|ENST00000572621.5|162017-HCT-15_RARE_RNA-W927R-and-162017-HCT-15_RARE_EXOME-W927R|927r|	PRPF8_p.W927R	927	HCT-15	CAM	TRUE	FALSE	TRUE	TRUE
ITGEAFMQFASQELAEK	K	K	FALSE	FALSE	A	17	29	45	2	7	0	NA	P52597	P52597	1B		sp|P52597|ENSG00000169813.16|HNRNPF|ENST00000443950.6|100445-HCT-15_SNP_RNA-V157M-and-100445-HCT-15_SNP_EXOME-V157M|157m|	HNRNPF_p.V157M	157	HCT-15	CAM	FALSE	TRUE	TRUE	TRUE
ITPVSSGSGTMGAAK	K	K	FALSE	FALSE	V	15	20	34	2	3	0	NA	O75955	O75955	1B		sp|O75955-1|ENSG00000137312.14|FLOT1|ENST00000376389.7|68038-HCT-15_RARE_RNA-L380P-and-68038-HCT-15_RARE_EXOME-L380P|380p|	FLOT1_p.L380P	380	HCT-15	CAM	TRUE	FALSE	TRUE	TRUE
IVPPSFISK	R	K	FALSE	FALSE	L	9	1	9	2	2	0	NA	Q8WZ42	Q8WZ42	1B		sp|Q8WZ42-1|ENSG00000155657.26|TTN|ENST00000615779.5|30874-HCT-15_SNP_EXOME-R7672S|7672s|	TTN_p.R7672S	7672	HCT-15	CAM	FALSE	TRUE	FALSE	TRUE
KAAAEDVNVTLEDQQK	K	K	FALSE	FALSE	L	16	7	22	3	1	0	NA	Q9NQP4	Q9NQP4	1B		sp|Q9NQP4|ENSG00000101132.9|PFDN4|ENST00000371419.6|186833-HCT-15_RARE_RNA-F17L-and-186833-HCT-15_RARE_EXOME-F17L|17l|	PFDN4_p.F17L	17	HCT-15	CAM	TRUE	FALSE	TRUE	TRUE
KAAVPAPEEEMDECEQALAAEPK	K	K	FALSE	FALSE	A	23	7	29	3, 4	4	0	14C(56.0374)	P26641	P26641	1B	266	sp|P26641-1|ENSG00000254772.9|EEF1G|ENST00000329251.4|112031-HCT-15_RARE_RNA-A256V-and-112031-HCT-15_RARE_EXOME-A256V|256v|	EEF1G_p.A256V	256	HCT-15	CAM	TRUE	FALSE	TRUE	TRUE
KAFSEYLGTDQSK	K	K	FALSE	FALSE	W	13	21	33	2, 3	6	0	NA	P10768	P10768	1B		sp|P10768|ENSG00000139684.13|ESD|ENST00000378720.7|129610-HCT-15_SNP_RNA-G190E-and-129610-HCT-15_SNP_EXOME-G190E|190e|	ESD_p.G190E	190	HCT-15	CAM	FALSE	TRUE	TRUE	TRUE
KAPPMPGPVPEAAQPFLFTPR	R	R	FALSE	FALSE	G	21	1	21	3	2	0	NA	Q7Z406	Q7Z406	1B		sp|Q7Z406-1|ENSG00000105357.16|MYH14|ENST00000376970.6|177517-HCT-15_RARE_RNA-R16M-and-177517-HCT-15_RARE_EXOME-R16M|16m|	MYH14_p.R16M	16	HCT-15	CAM	TRUE	FALSE	TRUE	TRUE
KATDTLDSTGKVTEEK	G	K	FALSE	FALSE	P	16	12	27	3	1	0	NA	Q8WWH5	Q8WWH5	1B		sp|Q8WWH5|ENSG00000165832.5|TRUB1|ENST00000298746.4|99068-HCT-15_SNP_RNA-R167K-and-99068-HCT-15_SNP_EXOME-R167K|167k|	TRUB1_p.R167K	167	HCT-15	CAM	FALSE	TRUE	TRUE	TRUE
KDFVSEQLTSLLVNEVQLPALGENK	R	K	FALSE	FALSE	K	25	17	41	3	2	0	NA	P54136	P54136	1B		sp|P54136-1|ENSG00000113643.8|RARS|ENST00000231572.7|57480-HCT-15_RARE_RNA-G182E-and-57480-HCT-15_RARE_EXOME-G182E|182e|	RARS_p.G182E	182	HCT-15	CAM	TRUE	FALSE	TRUE	TRUE
KEANHSEGQEGSEEADMMRK	K	K	FALSE	FALSE	K	20	6	25	4	1	0	17M(15.9949)	Q96PY6	Q96PY6	1B		sp|Q96PY6-1|ENSG00000137601.16|NEK1|ENST00000439128.6|52869-HCT-15_RARE_EXOME-R601M|601m|	NEK1_p.R601M	601	HCT-15	CAM	TRUE	FALSE	FALSE	TRUE
KEFSPFGTITSANVMMEGGR	R	R	FALSE	FALSE	S	20	1	20	3	3	0	NA	Q9H361	Q9H361	1B		sp|Q9H361|ENSG00000151846.8|PABPC3|ENST00000281589.4|127260-HCT-15_RARE_RNA-K324N,127260-HCT-15_RARE_RNA-A313E|313e324n|;sp|P11940-1|ENSG00000070756.15|PABPC1|ENST00000318607.9|87770-HCT-15_RARE_EXOME-K324N|324n|	PABPC3_p.K324N,A313E;PABPC1_p.K324N	324,313;324	HCT-15	CAM	TRUE	FALSE	TRUE	TRUE
KEYTIGETVNLMSVDAQK	R	K	FALSE	FALSE	L	18	13	30	2	1	0	12M(15.9949)	Q92887	Q92887	1B		sp|Q92887|ENSG00000023839.10|ABCC2|ENST00000370449.8|98619-HCT-15_SNP_EXOME-V417I|417i|	ABCC2_p.V417I	417	HCT-15	CAM	FALSE	TRUE	FALSE	TRUE
KFAEAFEDIPR	K	R	FALSE	FALSE	A	11	21	31	2, 3	5	0	NA	P50990	P50990	1B		sp|P50990-1|ENSG00000156261.12|CCT8|ENST00000286788.8|191141-HCT-15_RARE_RNA-A447D-and-191141-HCT-15_RARE_EXOME-A447D|447d|	CCT8_p.A447D	447	HCT-15	CAM	TRUE	FALSE	TRUE	TRUE
KFDDAVVQSDMK	R	K	FALSE	FALSE	H	12	8	19	2, 3	16	0	11M(15.9949)	P11142	P11142	1B		sp|P11142-1|ENSG00000109971.13|HSPA8|ENST00000532636.5|115059-HCT-15_RARE_RNA-R77K-and-115059-HCT-15_RARE_EXOME-R77K|77k|	HSPA8_p.R77K	77	HCT-15	CAM	TRUE	FALSE	TRUE	TRUE
KGGSYSQAASSDSAQGSDVSLTAC	R	C	FALSE	TRUE	K	24	9	32	3	5	0	24C(56.0374)	P04439	P04439	1B	363	sp|P04439|ENSG00000206503.12|HLA-A|ENST00000396634.5|63676-HCT-15_SNP_EXOME-T345S|345s|	HLA-A_p.T345S	345	HCT-15	CAM	FALSE	TRUE	FALSE	TRUE
KIDAAQNWFADPNGGPEGEEQIR	K	R	FALSE	FALSE	G	23	8	30	3	4	0	NA	P18206	P18206	1B		sp|P18206-1|ENSG00000035403.17|VCL|ENST00000211998.9|97891-HCT-15_RARE_EXOME-L395F|395f|	VCL_p.L395F	395	HCT-15	CAM	TRUE	FALSE	FALSE	TRUE
KLCFVALDFEQEMATAASSSSLEK	E	K	FALSE	FALSE	S	24	1	24	2	1	0	NA	P0CG38	P0CG38	1B	917	sp|A5A3E0|ENSG00000196604.12|POTEF|ENST00000409914.6|29568-HCT-15_RARE_EXOME-V930A,29568-HCT-15_RARE_EXOME-Y918F|918f930a|;sp|P0CG38|ENSG00000196834.11|POTEI|ENST00000451531.6|29623-HCT-15_SNP_EXOME-M929T,29623-HCT-15_SNP_EXOME-Y918F|918f929t|	POTEF_p.V930A,Y918F;POTEI_p.M929T,Y918F	930,918;929,918	HCT-15	CAM	TRUE	TRUE	FALSE	TRUE
KMNFIKEENMDGNLNEDIK	D	K	FALSE	FALSE	S	19	1	19	5	1	0	NA	Q8TBZ0	Q8TBZ0	1B		sp|Q8TBZ0-1|ENSG00000168491.9|CCDC110|ENST00000307588.7|53163-HCT-15_SNP_EXOME-L299M|299m|	CCDC110_p.L299M	299	HCT-15	CAM	FALSE	TRUE	FALSE	TRUE
KNDKEAAGEGPALYEDPPDHK	K	K	FALSE	FALSE	T	21	3	23	4	1	0	NA	P27695	P27695	1B		sp|P27695|ENSG00000100823.11|APEX1|ENST00000555414.5|130585-HCT-15_SNP_RNA-Q51H-and-130585-HCT-15_SNP_EXOME-Q51H|51h|	APEX1_p.Q51H	51	HCT-15	CAM	FALSE	TRUE	TRUE	TRUE
KPEDVLDDDGAGSAPLK	R	K	FALSE	FALSE	S	17	33	49	3	1	0	NA	P35613	P35613	1B		sp|P35613-1|ENSG00000172270.19|BSG|ENST00000333511.8|172215-HCT-15_RARE_EXOME-D359G|359g|	BSG_p.D359G	359	HCT-15	CAM	TRUE	FALSE	FALSE	TRUE
KSQIFSIASDNQPTVTIK	K	K	FALSE	FALSE	V	18	10	27	3	4	0	NA	P11021	P11021	1B		sp|P11021|ENSG00000044574.7|HSPA5|ENST00000324460.6|95250-HCT-15_RARE_RNA-T453I-and-95250-HCT-15_RARE_EXOME-T453I|453i|	HSPA5_p.T453I	453	HCT-15	CAM	TRUE	FALSE	TRUE	TRUE
KYTLPPGVDPAQVSSSLSPEGTLTVEAPMPK	R	K	FALSE	FALSE	L	31	7	37	3	13	0	29M(15.9949)	P04792	P04792	1B		sp|P04792|ENSG00000106211.8|HSPB1|ENST00000248553.6|73783-HCT-15_RARE_RNA-T151A-and-73783-HCT-15_RARE_EXOME-T151A|151a|	HSPB1_p.T151A	151	HCT-15	CAM	TRUE	FALSE	TRUE	TRUE
LAALALASSENSSSTPEECEETSEKPK	R	K	FALSE	FALSE	K	27	1	27	4	1	0	19C(56.0374)	O00567	O00567	1B	472	sp|O00567|ENSG00000101361.16|NOP56|ENST00000329276.9|185156-HCT-15_SNP_RNA-M475T-and-185156-HCT-15_SNP_EXOME-M475T|475t|	NOP56_p.M475T	475	HCT-15	CAM	FALSE	TRUE	TRUE	TRUE
LADDVDLEQVSNETHGHVGADLAALCSEAALQAIR	K	R	FALSE	FALSE	K	35	6	40	4, 5	7	0	26C(56.0374)	P55072	P55072	1B	415	sp|P55072|ENSG00000165280.15|VCP|ENST00000358901.10|93504-HCT-15_RARE_EXOME-A400S|400s|	VCP_p.A400S	400	HCT-15	CAM	TRUE	FALSE	FALSE	TRUE
LADGGGAGGTFQPYLDTLR	R	R	FALSE	FALSE	Q	19	9	27	2	1	0	NA	Q9Y5M8	Q9Y5M8	1B		sp|Q9Y5M8|ENSG00000144867.11|SRPRB|ENST00000466490.6|36899-HCT-15_SNP_RNA-V9L-and-36899-HCT-15_SNP_EXOME-V9L|9l|	SRPRB_p.V9L	9	HCT-15	CAM	FALSE	TRUE	TRUE	TRUE
LALLTELSQIR	R	R	FALSE	FALSE	S	11	7	17	2	1	0	NA	Q8N3P4	Q8N3P4	1B		sp|Q8N3P4-1|ENSG00000156931.15|VPS8|ENST00000625842.2|38467-HCT-15_RARE_RNA-N1389I-and-38467-HCT-15_RARE_EXOME-N1389I|1389i|	VPS8_p.N1389I	1389	HCT-15	CAM	TRUE	FALSE	TRUE	TRUE
LCFVALDFDQEMATVASSSSLEK	K	K	FALSE	FALSE	S	23	1	23	3	1	0	2C(56.0374)	P0CG39	P0CG39	1B	880	sp|P0CG39|ENSG00000222038.3|POTEJ|ENST00000409602.1|21958-HCT-15_RARE_EXOME-E887D,21958-HCT-15_SNP_EXOME-Y881F,21958-HCT-15_SNP_EXOME-M892T|881f887d892t|	POTEJ_p.E887D,Y881F,M892T	887881892	HCT-15	CAM	TRUE	TRUE	FALSE	TRUE
LCFVALDFEQEMAMAASSSSLEK	K	K	FALSE	FALSE	S	23	1	23	2	1	0	12M(15.9949), 2C(56.0374)	P0CG38	P0CG38	1B	917	sp|P0CG38|ENSG00000196834.11|POTEI|ENST00000451531.6|29623-HCT-15_SNP_EXOME-Y918F|918f|	POTEI_p.Y918F	918	HCT-15	CAM	FALSE	TRUE	FALSE	TRUE
LCYVALDFDQEMAMVASSSSLEK	K	K	FALSE	FALSE	S	23	1	23	2	1	0	12M(15.9949), 14M(15.9949)	P0CG39	P0CG39	1B	880	sp|P0CG39|ENSG00000222038.3|POTEJ|ENST00000409602.1|21958-HCT-15_RARE_EXOME-E887D|887d|	POTEJ_p.E887D	887	HCT-15	CAM	TRUE	FALSE	FALSE	TRUE
LEAVSHTSDMHSGYADSPSK	R	K	FALSE	FALSE	A	20	1	20	2, 3, 4	17	0	10M(15.9949)	Q01518	Q01518	1B		sp|Q01518-1|ENSG00000131236.16|CAP1|ENST00000372797.7|2315-HCT-15_RARE_RNA-R29S-and-2315-HCT-15_RARE_EXOME-R29S|29s|	CAP1_p.R29S	29	HCT-15	CAM	TRUE	FALSE	TRUE	TRUE
LEEALMADMMAHVEELAR	R	R	FALSE	FALSE	D	18	15	32	3	1	0	NA	O95983	O95983	1B		sp|O95983-1|ENSG00000071655.17|MBD3|ENST00000434436.7|178978-HCT-15_RARE_RNA-L248M-and-178978-HCT-15_RARE_EXOME-L248M|248m|	MBD3_p.L248M	248	HCT-15	CAM	TRUE	FALSE	TRUE	TRUE
LEFSIYPAPH	K	H	FALSE	FALSE	V	10	6	15	2	2	0	NA	Q9BQE3	Q9BQE3	1B		sp|Q9BQE3|ENSG00000167553.15|TUBA1C|ENST00000301072.10|117399-HCT-15_RARE_RNA-Q176H-and-117399-HCT-15_RARE_EXOME-Q176H|176h|	TUBA1C_p.Q176H	176	HCT-15	CAM	TRUE	FALSE	TRUE	TRUE
LEGILEGLGLR	R	R	FALSE	FALSE	E	11	13	23	2	1	0	NA	Q9BSH5	Q9BSH5	1B		sp|Q9BSH5|ENSG00000119431.9|HDHD3|ENST00000238379.9|94947-HCT-15_SNP_RNA-G146E-and-94947-HCT-15_SNP_EXOME-G146E|146e|	HDHD3_p.G146E	146	HCT-15	CAM	FALSE	TRUE	TRUE	TRUE
LFDFQGLQHQVAHVSTQLEAAR	R	R	FALSE	FALSE	L	22	9	30	3, 4	2	0	NA	P45954	P45954	1B		sp|P45954-1|ENSG00000196177.12|ACADSB|ENST00000358776.6|99302-HCT-15_RARE_RNA-A340S-and-99302-HCT-15_RARE_EXOME-A340S|340s|	ACADSB_p.A340S	340	HCT-15	CAM	TRUE	FALSE	TRUE	TRUE
LFGPPLAGTPAGYSPGGVPSAYPELHAALDR	C	R	TRUE	FALSE	L	31	24	54	3	1	0	NA	Q96IF1	Q96IF1	1B		sp|Q96IF1-1|ENSG00000129474.15|AJUBA|ENST00000262713.6|134905-HCT-15_RARE_RNA-A191T-and-134905-HCT-15_RARE_EXOME-A191T|191t|	AJUBA_p.A191T	191	HCT-15	CAM	TRUE	FALSE	TRUE	TRUE
LFGTSPATEAAPPPPEPVPAAQGPATVQSVEDFVPDDRLDR	R	R	FALSE	FALSE	S	41	9	49	3	2	0	NA	Q3YEC7	Q3YEC7	1B		sp|Q3YEC7-1|ENSG00000196642.18|RABL6|ENST00000311502.11|92549-HCT-15_SNP_RNA-E382Q-and-92549-HCT-15_SNP_EXOME-E382Q|382q|	RABL6_p.E382Q	382	HCT-15	CAM	FALSE	TRUE	TRUE	TRUE
LGGTTDDCELVEGLVLTQK	K	K	FALSE	FALSE	V	19	7	25	3	4	0	8C(56.0374)	P50991	P50991	1B	221	sp|P50991-1|ENSG00000115484.14|CCT4|ENST00000394440.7|27519-HCT-15_RARE_EXOME-I218T|218t|	CCT4_p.I218T	218	HCT-15	CAM	TRUE	FALSE	FALSE	TRUE
LGITPEGQSYLDQFR	K	R	FALSE	FALSE	Q	15	7	21	2	5	0	NA	Q2M389	Q2M389	1B		sp|Q2M389-1|ENSG00000136051.14|WASHC4|ENST00000332180.9|119892-HCT-15_SNP_RNA-V901I-and-119892-HCT-15_SNP_EXOME-V901I|901i|	WASHC4_p.V901I	901	HCT-15	CAM	FALSE	TRUE	TRUE	TRUE
LGPGGLDPVEVYESLHEELQ	R	Q	FALSE	FALSE	K	20	13	32	2	1	0	NA	Q16543	Q16543	1B		sp|Q16543|ENSG00000105401.8|CDC37|ENST00000222005.6|180096-HCT-15_RARE_EXOME-P302H|302h|	CDC37_p.P302H	302	HCT-15	CAM	TRUE	FALSE	FALSE	TRUE
LGPGGLDPVEVYESLHEELQK	R	K	FALSE	FALSE	C	21	13	33	2, 3	15	0	NA	Q16543	Q16543	1B		sp|Q16543|ENSG00000105401.8|CDC37|ENST00000222005.6|180096-HCT-15_RARE_EXOME-P302H|302h|	CDC37_p.P302H	302	HCT-15	CAM	TRUE	FALSE	FALSE	TRUE
LIDIPDPVPALDLGQQLQLK	R	K	FALSE	FALSE	V	20	15	34	2	2	0	NA	Q13948	Q13948	1B		sp|Q13948-1|ENSG00000257923.10|CUX1|ENST00000292538.9|74767-HCT-15_RARE_EXOME-V99I|99i|;sp|P39880-1|ENSG00000257923.10|CUX1|ENST00000546411.7|74775-HCT-15_RARE_EXOME-V88I|88i|	CUX1_p.V99I;CUX1_p.V88I	99;88	HCT-15	CAM	TRUE	FALSE	FALSE	TRUE
LIQDEQILR	K	R	FALSE	FALSE	N	9	1	9	2	1	0	NA	Q96AE7	Q96AE7	1B		sp|Q96AE7-1|ENSG00000052841.14|TTC17|ENST00000039989.8|104573-HCT-15_RARE_RNA-E387D-and-104573-HCT-15_RARE_EXOME-E387D|387d|	TTC17_p.E387D	387	HCT-15	CAM	TRUE	FALSE	TRUE	TRUE
LLDTVDDMLANDIVR	K	R	FALSE	FALSE	L	15	5	19	2	3	0	NA	Q9H4M9	Q9H4M9	1B		sp|Q9H4M9|ENSG00000110047.17|EHD1|ENST00000320631.7|112450-HCT-15_RARE_RNA-A391V-and-112450-HCT-15_RARE_EXOME-A391V|391v|	EHD1_p.A391V	391	HCT-15	CAM	TRUE	FALSE	TRUE	TRUE
LLLPGELANHAVSEGTK	R	K	FALSE	FALSE	A	17	10	26	2, 3	23	0	NA	Q99880	Q99880	1B		sp|Q99880|ENSG00000185130.5|HIST1H2BL|ENST00000377401.3|67796-HCT-15_RARE_RNA-K109N-and-67796-HCT-15_RARE_EXOME-K109N|109n|	HIST1H2BL_p.K109N	109	HCT-15	CAM	TRUE	FALSE	TRUE	TRUE
LLQAQAAGVDWR	R	R	FALSE	FALSE	E	12	1	12	2	2	0	NA	Q5SY16	Q5SY16	1B		sp|Q5SY16|ENSG00000162408.10|NOL9|ENST00000377705.5|9966-HCT-15_SNP_EXOME-S58A|58a|	NOL9_p.S58A	58	HCT-15	CAM	FALSE	TRUE	FALSE	TRUE
LLQDLQLGDEEDAWK	R	K	FALSE	FALSE	R	15	1	15	2	1	0	NA	Q14692	Q14692	1B		sp|Q14692|ENSG00000165733.7|BMS1|ENST00000374518.5|97133-HCT-15_SNP_RNA-R38W-and-97133-HCT-15_SNP_EXOME-R38W|38w|	BMS1_p.R38W	38	HCT-15	CAM	FALSE	TRUE	TRUE	TRUE
LLSDLLPPSTGTFQEAQSR	R	R	FALSE	FALSE	L	19	11	29	2	9	0	NA	Q9Y490	Q9Y490	1B		sp|Q9Y490|ENSG00000137076.20|TLN1|ENST00000314888.9|93585-HCT-15_SNP_EXOME-S1227L|1227l|	TLN1_p.S1227L	1227	HCT-15	CAM	FALSE	TRUE	FALSE	TRUE
LLTQDEGPALVPGSR	R	R	FALSE	FALSE	L	15	7	21	2	2	0	NA	Q5T440	Q5T440	1B		sp|Q5T440|ENSG00000181873.12|IBA57|ENST00000366711.3|8718-HCT-15_SNP_RNA-G211S-and-8718-HCT-15_SNP_EXOME-G211S|211s|	IBA57_p.G211S	211	HCT-15	CAM	FALSE	TRUE	TRUE	TRUE
LNATEEMLQQELLSR	K	R	FALSE	FALSE	T	15	5	19	2	1	0	NA	Q86W92	Q86W92	1B		sp|Q86W92-1|ENSG00000110841.13|PPFIBP1|ENST00000318304.12|116846-HCT-15_SNP_RNA-V148L-and-116846-HCT-15_SNP_EXOME-V148L|148l|	PPFIBP1_p.V148L	148	HCT-15	CAM	FALSE	TRUE	TRUE	TRUE
LPGELANHAVSEGTK	L	K	FALSE	FALSE	A	15	12	26	2, 3	4	0	NA	Q99880	Q99880	1B		sp|Q99880|ENSG00000185130.5|HIST1H2BL|ENST00000377401.3|67796-HCT-15_RARE_RNA-K109N-and-67796-HCT-15_RARE_EXOME-K109N|109n|	HIST1H2BL_p.K109N	109	HCT-15	CAM	TRUE	FALSE	TRUE	TRUE
LQAAYAGDKANDIQKR	R	R	FALSE	FALSE	E	16	3	18	3	1	0	NA	Q01082	Q01082	1B		sp|Q01082-1|ENSG00000115306.15|SPTBN1|ENST00000356805.8|19558-HCT-15_RARE_RNA-D1880N-and-19558-HCT-15_RARE_EXOME-D1880N|1880n|	SPTBN1_p.D1880N	1880	HCT-15	CAM	TRUE	FALSE	TRUE	TRUE
LQELTPSSGDPGEHDPASTHK	R	K	FALSE	FALSE	S	21	8	28	4	4	0	NA	Q14258	Q14258	1B		sp|Q14258|ENSG00000121060.16|TRIM25|ENST00000316881.8|166246-HCT-15_SNP_RNA-P358L-and-166246-HCT-15_SNP_EXOME-P358L|358l|	TRIM25_p.P358L	358	HCT-15	CAM	FALSE	TRUE	TRUE	TRUE
LQPPSGTELLAFNPIVHPSAITQVLLLANPQK	K	K	FALSE	FALSE	E	32	5	36	3	2	0	NA	Q9UJY5	Q9UJY5	1B		sp|Q9UJY5-1|ENSG00000100083.18|GGA1|ENST00000343632.8|193521-HCT-15_RARE_RNA-P581L-and-193521-HCT-15_RARE_EXOME-P581L|581l|	GGA1_p.P581L	581	HCT-15	CAM	TRUE	FALSE	TRUE	TRUE
LQQEANLLQLK	K	K	FALSE	FALSE	S	11	1	11	2	8	0	NA	Q15149	Q15149	1B		sp|Q15149-1|ENSG00000178209.14|PLEC|ENST00000322810.8|89058-HCT-15_RARE_RNA-K2604N-and-89058-HCT-15_RARE_EXOME-K2604N|2604n|	PLEC_p.K2604N	2604	HCT-15	CAM	TRUE	FALSE	TRUE	TRUE
LQQLPADFGHLVNLQHLDLLNNK	K	K	FALSE	FALSE	L	23	1	23	3, 4	4	0	NA	Q96AG4	Q96AG4	1B		sp|Q96AG4|ENSG00000108829.9|LRRC59|ENST00000225972.7|166134-HCT-15_RARE_RNA-R83H-and-166134-HCT-15_RARE_EXOME-R83H|83h|	LRRC59_p.R83H	83	HCT-15	CAM	TRUE	FALSE	TRUE	TRUE
LQQQHSEQPPLQPSPVTTR	R	R	FALSE	FALSE	R	19	1	19	3	4	0	NA	Q5JTV8	Q5JTV8	1B		sp|Q5JTV8-1|ENSG00000143337.18|TOR1AIP1|ENST00000606911.6|7196-HCT-15_SNP_RNA-M146T-and-7196-HCT-15_SNP_EXOME-M146T|146t|	TOR1AIP1_p.M146T	146	HCT-15	CAM	FALSE	TRUE	TRUE	TRUE
LQQQLTQAAQELASEKEK	K	K	FALSE	FALSE	L	18	1	18	3	1	0	NA	Q15075	Q15075	1B		sp|Q15075|ENSG00000102189.16|EEA1|ENST00000322349.12|125296-HCT-15_SNP_RNA-A1009S-and-125296-HCT-15_SNP_EXOME-A1009S|1009s|	EEA1_p.A1009S	1009	HCT-15	CAM	FALSE	TRUE	TRUE	TRUE
LSDSYSNTLPVGK	K	K	FALSE	FALSE	S	13	1	13	2	3	0	NA	Q9UQB8	Q9UQB8	1B		sp|Q9UQB8-1|ENSG00000175866.15|BAIAP2|ENST00000321300.10|161442-HCT-15_RARE_RNA-R344G-and-161442-HCT-15_RARE_EXOME-R344G|344g|	BAIAP2_p.R344G	344	HCT-15	CAM	TRUE	FALSE	TRUE	TRUE
LSPQDPSEDVSSMDPLK	K	K	FALSE	FALSE	L	17	23	39	2	1	0	NA	Q53T59	Q53T59	1B		sp|Q53T59|ENSG00000118960.12|HS1BP3|ENST00000304031.7|26200-HCT-15_SNP_EXOME-V260M|260m|	HS1BP3_p.V260M	260	HCT-15	CAM	FALSE	TRUE	FALSE	TRUE
LSPYALAFMPPGYEEDMK	K	K	FALSE	FALSE	L	18	8	25	2	1	0	NA	Q9BXJ9	Q9BXJ9	1B		sp|Q9BXJ9-1|ENSG00000164134.12|NAA15|ENST00000296543.9|48202-HCT-15_RARE_RNA-F832S-and-48202-HCT-15_RARE_EXOME-F832S|832s|	NAA15_p.F832S	832	HCT-15	CAM	TRUE	FALSE	TRUE	TRUE
LSVTWPEGDELLPNEIRPAGTPIGALR	R	R	FALSE	FALSE	L	27	7	33	3	3	0	NA	A6NHR9	A6NHR9	1B		sp|A6NHR9-1|ENSG00000101596.15|SMCHD1|ENST00000320876.10|168508-HCT-15_SNP_RNA-V708I-and-168508-HCT-15_SNP_EXOME-V708I|708i|	SMCHD1_p.V708I	708	HCT-15	CAM	FALSE	TRUE	TRUE	TRUE
LTQAQIFDYSEIPNFPR	K	R	FALSE	FALSE	S	17	20	36	2	5	0	NA	P00491	P00491	1B		sp|P00491|ENSG00000198805.11|PNP|ENST00000361505.9|130606-HCT-15_SNP_RNA-G51S-and-130606-HCT-15_SNP_EXOME-G51S|51s|	PNP_p.G51S	51	HCT-15	CAM	FALSE	TRUE	TRUE	TRUE
LVDYLEWIR	R	R	FALSE	FALSE	K	9	1	9	2	1	0	NA	Q96BR5	Q96BR5	1B		sp|Q96BR5|ENSG00000162377.5|COA7|ENST00000371538.4|12322-HCT-15_RARE_RNA-G46W-and-12322-HCT-15_RARE_EXOME-G46W|46w|	COA7_p.G46W	46	HCT-15	CAM	TRUE	FALSE	TRUE	TRUE
LVGLEDPSVR	R	R	FALSE	FALSE	E	10	11	20	2	1	0	NA	Q8NBN7	Q8NBN7	1B		sp|Q8NBN7-1|ENSG00000160439.15|RDH13|ENST00000415061.7|184609-HCT-15_RARE_RNA-A321D-and-184609-HCT-15_RARE_EXOME-A321D|321d|	RDH13_p.A321D	321	HCT-15	CAM	TRUE	FALSE	TRUE	TRUE
LVVVGAGDVGK	K	K	FALSE	FALSE	S	11	6	16	2	4	0	NA	P01116	P01116	1B		sp|P01116-1|ENSG00000133703.11|KRAS|ENST00000256078.8|122572-HCT-15_RARE_RNA-G13D-and-122572-HCT-15_RARE_EXOME-G13D|13d|	KRAS_p.G13D	13	HCT-15	CAM	TRUE	FALSE	TRUE	TRUE
MADALDNYVVR	R	R	FALSE	FALSE	G	11	9	19	2	2	0	NA	P05165	P05165	1B		sp|P05165-1|ENSG00000175198.16|PCCA|ENST00000376285.5|128499-HCT-15_SNP_EXOME-I475V|475v|	PCCA_p.I475V	475	HCT-15	CAM	FALSE	TRUE	FALSE	TRUE
MCSSCLVCEPK	K	K	FALSE	FALSE	G	11	13	23	2	2	0	NA	Q8N614	Q8N614	1B	97100103	sp|Q8N614|ENSG00000121895.7|TMEM156|ENST00000381938.3|50007-HCT-15_SNP_EXOME-S105P|105p|	TMEM156_p.S105P	105	HCT-15	CAM	FALSE	TRUE	FALSE	TRUE
MDQCFNQMEK	R	K	FALSE	FALSE	L	10	1	10	2	2	0	1M(15.9949), 4C(56.0374)	Q04637	Q04637	1B	958	sp|Q04637-1|ENSG00000114867.20|EIF4G1|ENST00000346169.6|38371-HCT-15_SNP_RNA-Y958C-and-38371-HCT-15_SNP_EXOME-Y958C|958c|	EIF4G1_p.Y958C	958	HCT-15	CAM	FALSE	TRUE	TRUE	TRUE
MEAVVNLYQEVMNHADPR	-	R	FALSE	FALSE	L	18	1	18	2	2	0	12M(15.9949), N-term(42.0106)	Q9BW60	Q9BW60	1B		sp|Q9BW60-1|ENSG00000066322.14|ELOVL1|ENST00000372458.7|11828-HCT-15_RARE_RNA-K13N-and-11828-HCT-15_RARE_EXOME-K13N|13n|	ELOVL1_p.K13N	13	HCT-15	CAM	TRUE	FALSE	TRUE	TRUE
MEPHATIAEIK	K	K	FALSE	FALSE	N	11	9	19	2	1	0	NA	Q9NZ01	Q9NZ01	1B		sp|Q9NZ01-1|ENSG00000099797.14|TECR|ENST00000215567.9|173983-HCT-15_RARE_RNA-V23M-and-173983-HCT-15_RARE_EXOME-V23M|23m|	TECR_p.V23M	23	HCT-15	CAM	TRUE	FALSE	TRUE	TRUE
MQYAPNTQVEILPQGR	R	R	FALSE	FALSE	E	16	16	31	2	1	0	1M(15.9949)	P40121	P40121	1B		sp|P40121-1|ENSG00000042493.15|CAPG|ENST00000263867.8|28345-HCT-15_SNP_RNA-H335R-and-28345-HCT-15_SNP_EXOME-H335R|335r|	CAPG_p.H335R	335	HCT-15	CAM	FALSE	TRUE	TRUE	TRUE
NAINTEMYHEIMHALK	K	K	FALSE	FALSE	A	16	7	22	3	3	0	NA	O75521	O75521	1B		sp|O75521-1|ENSG00000198721.12|ECI2|ENST00000380118.7|67283-HCT-15_RARE_RNA-R174H-and-67283-HCT-15_RARE_EXOME-R174H|174h|	ECI2_p.R174H	174	HCT-15	CAM	TRUE	FALSE	TRUE	TRUE
NESTRPSEELELDKWK	K	K	FALSE	FALSE	T	16	11	26	3	2	0	NA	Q7L0Y3	Q7L0Y3	1B		sp|Q7L0Y3|ENSG00000174173.6|TRMT10C|ENST00000309922.6|35912-HCT-15_SNP_RNA-P56R-and-35912-HCT-15_SNP_EXOME-P56R|56r|	TRMT10C_p.P56R	56	HCT-15	CAM	FALSE	TRUE	TRUE	TRUE
NGQGDAPPTPPPTPVDLELEWVLGK	R	K	FALSE	FALSE	M	25	9	33	2	7	0	NA	O15067	O15067	1B		sp|O15067|ENSG00000178921.13|PFAS|ENST00000314666.10|156540-HCT-15_SNP_RNA-L621P-and-156540-HCT-15_SNP_EXOME-L621P|621p|	PFAS_p.L621P	621	HCT-15	CAM	FALSE	TRUE	TRUE	TRUE
NIGVIVVGFPATPIIESR	R	R	FALSE	FALSE	A	18	8	25	2	1	0	NA	O15270	O15270	1B		sp|O15270|ENSG00000100596.6|SPTLC2|ENST00000216484.6|136873-HCT-15_RARE_RNA-V494I-and-136873-HCT-15_RARE_EXOME-V494I|494i|	SPTLC2_p.V494I	494	HCT-15	CAM	TRUE	FALSE	TRUE	TRUE
NLHQSGFSLSDAQIDDNIPR	R	R	FALSE	FALSE	R	20	10	29	2, 3	5	0	NA	Q16555	Q16555	1B		sp|Q16555-1|ENSG00000092964.17|DPYSL2|ENST00000311151.9|82262-HCT-15_RARE_EXOME-G543D|543d|	DPYSL2_p.G543D	543	HCT-15	CAM	TRUE	FALSE	FALSE	TRUE
NLPAGTLAAELQETFGHFGSLGR	K	R	FALSE	FALSE	V	23	9	31	3	1	0	NA	Q9Y4C8	Q9Y4C8	1B		sp|Q9Y4C8|ENSG00000122965.10|RBM19|ENST00000545145.6|126210-HCT-15_SNP_RNA-Q602E-and-126210-HCT-15_SNP_EXOME-Q602E|602e|	RBM19_p.Q602E	602	HCT-15	CAM	FALSE	TRUE	TRUE	TRUE
NPYALLDEDEC	R	C	FALSE	TRUE	-	11	27	37	2	1	0	11C(56.0374)	P36915	P36915	1B	607	sp|P36915-1|ENSG00000204590.12|GNL1|ENST00000376621.7|67995-HCT-15_RARE_RNA-G603D-and-67995-HCT-15_RARE_EXOME-G603D|603d|	GNL1_p.G603D	603	HCT-15	CAM	TRUE	FALSE	TRUE	TRUE
NSLEFFTMLAQR	R	R	FALSE	FALSE	R	12	10	21	2	2	0	NA	Q9BVP2	Q9BVP2	1B		sp|Q9BVP2-1|ENSG00000163938.16|GNL3|ENST00000418458.5|35128-HCT-15_SNP_RNA-V367M-and-35128-HCT-15_SNP_EXOME-V367M|367m|	GNL3_p.V367M	367	HCT-15	CAM	FALSE	TRUE	TRUE	TRUE
NTVLATWQPYSTSK	K	K	FALSE	FALSE	D	14	12	25	2	4	0	NA	Q9BY44	Q9BY44	1B		sp|Q9BY44-1|ENSG00000144895.11|EIF2A|ENST00000460851.5|37365-HCT-15_SNP_EXOME-T97S|97s|	EIF2A_p.T97S	97	HCT-15	CAM	FALSE	TRUE	FALSE	TRUE
NVVYPLYQLGGPQLR	R	R	FALSE	FALSE	V	15	4	18	2	3	0	NA	Q16540	Q16540	1B		sp|Q16540|ENSG00000214026.10|MRPL23|ENST00000381519.5|103188-HCT-15_SNP_EXOME-R11Q|11q|	MRPL23_p.R11Q	11	HCT-15	CAM	FALSE	TRUE	FALSE	TRUE
PAQVSSSLSPEGTLTVEAPMPK	D	K	FALSE	FALSE	L	22	16	37	2	1	0	NA	P04792	P04792	1B		sp|P04792|ENSG00000106211.8|HSPB1|ENST00000248553.6|73783-HCT-15_RARE_RNA-T151A-and-73783-HCT-15_RARE_EXOME-T151A|151a|	HSPB1_p.T151A	151	HCT-15	CAM	TRUE	FALSE	TRUE	TRUE
PGELANHAVSEGTK	L	K	FALSE	FALSE	A	14	13	26	2, 3	4	0	NA	Q99880	Q99880	1B		sp|Q99880|ENSG00000185130.5|HIST1H2BL|ENST00000377401.3|67796-HCT-15_RARE_RNA-K109N-and-67796-HCT-15_RARE_EXOME-K109N|109n|	HIST1H2BL_p.K109N	109	HCT-15	CAM	TRUE	FALSE	TRUE	TRUE
PIYEGYALPHAILCLDLAGRDLTDYLMK	V	K	FALSE	FALSE	L	28	48	75	3	1	0	14C(56.0374)	P60709	P60709	1B	177	sp|P60709|ENSG00000075624.14|ACTB|ENST00000646664.1|76882-HCT-15_RARE_RNA-R177C-and-76882-HCT-15_RARE_EXOME-R177C|177c|	ACTB_p.R177C	177	HCT-15	CAM	TRUE	FALSE	TRUE	TRUE
PLAGTNGETTIQGLDGLSER	V	R	FALSE	FALSE	C	20	9	28	2	2	0	NA	P04075	P04075	1B		sp|P04075-1|ENSG00000149925.18|ALDOA|ENST00000569545.5|147948-HCT-15_RARE_EXOME-T125I|125i|	ALDOA_p.T125I	125	HCT-15	CAM	TRUE	FALSE	FALSE	TRUE
PPPPPGPPPPPVSTSSGSDESASR	P	R	FALSE	FALSE	S	24	1	24	2	1	0	NA	Q01518	Q01518	1B		sp|Q01518-1|ENSG00000131236.16|CAP1|ENST00000372797.7|2315-HCT-15_RARE_RNA-C236G-and-2315-HCT-15_RARE_EXOME-C236G,2315-HCT-15_RARE_EXOME-I245S,2315-HCT-15_RARE_EXOME-C247G,2315-HCT-15_RARE_EXOME-Y249D|236g245s247g249d|	CAP1_p.C236G,I245S,C247G,Y249D	236245247249	HCT-15	CAM	TRUE	FALSE	TRUE	TRUE
QAIDDDCNQTGQMTAGFLDWPQGTFASQVTLEGDNLKVER	K	R	FALSE	FALSE	E	40	1	40	4	1	0	7C(56.0374)	P38117	P38117	1B	131	sp|P38117-1|ENSG00000105379.9|ETFB|ENST00000309244.8|184092-HCT-15_RARE_RNA-K159N-and-184092-HCT-15_RARE_EXOME-K159N|159n|	ETFB_p.K159N	159	HCT-15	CAM	TRUE	FALSE	TRUE	TRUE
QEPFLLSGGDDGALK	R	K	FALSE	FALSE	L	15	24	38	2	1	0	NA	Q9BQ67	Q9BQ67	1B		sp|Q9BQ67|ENSG00000105447.12|GRWD1|ENST00000253237.9|177102-HCT-15_SNP_RNA-R319Q-and-177102-HCT-15_SNP_EXOME-R319Q|319q|	GRWD1_p.R319Q	319	HCT-15	CAM	FALSE	TRUE	TRUE	TRUE
QLATVNEQSLQNGFEELIQWTK	K	K	FALSE	FALSE	E	22	21	42	2	1	0	NA	Q92665	Q92665	1B		sp|Q92665|ENSG00000102738.7|MRPS31|ENST00000323563.7|129436-HCT-15_RARE_RNA-P293S-and-129436-HCT-15_RARE_EXOME-P293S|293s|	MRPS31_p.P293S	293	HCT-15	CAM	TRUE	FALSE	TRUE	TRUE
QLGQDLLNSYTENEGK	R	K	FALSE	FALSE	M	16	15	30	2	1	0	NA	O95757	O95757	1B		sp|O95757|ENSG00000164070.11|HSPA4L|ENST00000508776.5|48077-HCT-15_SNP_RNA-I601T-and-48077-HCT-15_SNP_EXOME-I601T|601t|	HSPA4L_p.I601T	601	HCT-15	CAM	FALSE	TRUE	TRUE	TRUE
QLQIFDPR	K	R	FALSE	FALSE	T	8	5	12	2	1	0	NA	P57737	P57737	1B		sp|P57737-1|ENSG00000262246.5|CORO7|ENST00000251166.8|151866-HCT-15_SNP_RNA-R193Q-and-151866-HCT-15_SNP_EXOME-R193Q|193q|	CORO7_p.R193Q	193	HCT-15	CAM	FALSE	TRUE	TRUE	TRUE
QLWGLLIEEAEKR	K	R	FALSE	FALSE	H	13	1	13	2, 3	4	0	NA	Q01082	Q01082	1B		sp|Q01082-1|ENSG00000115306.15|SPTBN1|ENST00000356805.8|19558-HCT-15_RARE_RNA-T1581A-and-19558-HCT-15_RARE_EXOME-T1581A|1581a|	SPTBN1_p.T1581A	1581	HCT-15	CAM	TRUE	FALSE	TRUE	TRUE
QQNGIVPIVEPEILPDGGHDLK	C	K	TRUE	FALSE	R	22	1	22	3	1	0	NA	P04075	P04075	1B		sp|P04075-1|ENSG00000149925.18|ALDOA|ENST00000569545.5|147948-HCT-15_RARE_RNA-D196G-and-147948-HCT-15_RARE_EXOME-D196G|196g|	ALDOA_p.D196G	196	HCT-15	CAM	TRUE	FALSE	TRUE	TRUE
QQNGIVPIVEPEILPDGGHDLKR	C	R	TRUE	FALSE	C	23	1	23	4	1	0	NA	P04075	P04075	1B		sp|P04075-1|ENSG00000149925.18|ALDOA|ENST00000569545.5|147948-HCT-15_RARE_RNA-D196G-and-147948-HCT-15_RARE_EXOME-D196G|196g|	ALDOA_p.D196G	196	HCT-15	CAM	TRUE	FALSE	TRUE	TRUE
QSGGSSQAGAVTVSDVQELMR	R	R	FALSE	FALSE	R	21	8	28	2	6	0	NA	O00233	O00233	1B		sp|O00233-1|ENSG00000110801.13|PSMD9|ENST00000541212.5|120676-HCT-15_SNP_RNA-V17A-and-120676-HCT-15_SNP_EXOME-V17A|17a|	PSMD9_p.V17A	17	HCT-15	CAM	FALSE	TRUE	TRUE	TRUE
REEMEQLFHDDQGSVTR	R	R	FALSE	FALSE	W	17	1	17	3	1	0	NA	Q15643	Q15643	1B		sp|Q15643|ENSG00000100815.12|TRIP11|ENST00000267622.8|137163-HCT-15_SNP_RNA-G1827S-and-137163-HCT-15_SNP_EXOME-G1827S|1827s|	TRIP11_p.G1827S	1827	HCT-15	CAM	FALSE	TRUE	TRUE	TRUE
RKPEDVLDDDGAGSAPLK	R	K	FALSE	FALSE	S	18	32	49	3	2	0	NA	P35613	P35613	1B		sp|P35613-1|ENSG00000172270.19|BSG|ENST00000333511.8|172215-HCT-15_RARE_EXOME-D359G|359g|	BSG_p.D359G	359	HCT-15	CAM	TRUE	FALSE	FALSE	TRUE
RLEEALMADMMAHVEELAR	K	R	FALSE	FALSE	D	19	14	32	3	2	0	NA	O95983	O95983	1B		sp|O95983-1|ENSG00000071655.17|MBD3|ENST00000434436.7|178978-HCT-15_RARE_RNA-L248M-and-178978-HCT-15_RARE_EXOME-L248M|248m|	MBD3_p.L248M	248	HCT-15	CAM	TRUE	FALSE	TRUE	TRUE
RLGPGGLDPVEVYESLHEELQK	K	K	FALSE	FALSE	C	22	12	33	3	1	0	NA	Q16543	Q16543	1B		sp|Q16543|ENSG00000105401.8|CDC37|ENST00000222005.6|180096-HCT-15_RARE_EXOME-P302H|302h|	CDC37_p.P302H	302	HCT-15	CAM	TRUE	FALSE	FALSE	TRUE
RPPDTPGPETNSMEAAPGSPPGEGAPLAADVYVGNLPR	R	R	FALSE	FALSE	D	38	29	66	3	2	0	NA	Q2M296	Q2M296	1B		sp|Q2M296-1|ENSG00000103248.18|MTHFSD|ENST00000360900.10|155350-HCT-15_SNP_RNA-G315R-and-155350-HCT-15_SNP_EXOME-G315R|315r|	MTHFSD_p.G315R	315	HCT-15	CAM	FALSE	TRUE	TRUE	TRUE
RYEVPLETPR	R	R	FALSE	FALSE	V	10	1	10	2, 3	3	0	NA	P10253	P10253	1B		sp|P10253|ENSG00000171298.12|GAA|ENST00000390015.7|161319-HCT-15_SNP_RNA-H199R-and-161319-HCT-15_SNP_EXOME-H199R|199r|	GAA_p.H199R	199	HCT-15	CAM	FALSE	TRUE	TRUE	TRUE
SACSLESNLEGLAGVLESDLPNYK	K	K	FALSE	FALSE	S	24	7	30	2	1	0	3C(56.0374)	Q09161	Q09161	1B	44	sp|Q09161|ENSG00000136937.12|NCBP1|ENST00000375147.7|91061-HCT-15_RARE_RNA-A59S-and-91061-HCT-15_RARE_EXOME-A59S|59s|	NCBP1_p.A59S	59	HCT-15	CAM	TRUE	FALSE	TRUE	TRUE
SALFAQINQGESITH	R	H	FALSE	FALSE	A	15	1	15	2	1	0	NA	Q01518	Q01518	1B		sp|Q01518-1|ENSG00000131236.16|CAP1|ENST00000372797.7|2315-HCT-15_RARE_RNA-S256A-and-2315-HCT-15_RARE_EXOME-S256A|256a|	CAP1_p.S256A	256	HCT-15	CAM	TRUE	FALSE	TRUE	TRUE
SALFAQINQGESITHALK	R	K	FALSE	FALSE	H	18	1	18	2, 3	13	0	NA	Q01518	Q01518	1B		sp|Q01518-1|ENSG00000131236.16|CAP1|ENST00000372797.7|2315-HCT-15_RARE_RNA-S256A-and-2315-HCT-15_RARE_EXOME-S256A|256a|	CAP1_p.S256A	256	HCT-15	CAM	TRUE	FALSE	TRUE	TRUE
SALQSINEWAAQTTNGK	R	K	FALSE	FALSE	L	17	6	22	2	1	0	NA	P50454	P50454	1B		sp|P50454|ENSG00000149257.13|SERPINH1|ENST00000533603.5|107237-HCT-15_RARE_RNA-D182N-and-107237-HCT-15_RARE_EXOME-D182N|182n|	SERPINH1_p.D182N	182	HCT-15	CAM	TRUE	FALSE	TRUE	TRUE
SALQSINEWAAQTTNGKLPEVTK	R	K	FALSE	FALSE	D	23	6	28	3	2	0	NA	P50454	P50454	1B		sp|P50454|ENSG00000149257.13|SERPINH1|ENST00000533603.5|107237-HCT-15_RARE_RNA-D182N-and-107237-HCT-15_RARE_EXOME-D182N|182n|	SERPINH1_p.D182N	182	HCT-15	CAM	TRUE	FALSE	TRUE	TRUE
SALSGHLETLILGLLK	K	K	FALSE	FALSE	T	16	11	26	2, 3	3	0	NA	P07355	P07355	1B		sp|P07355-1|ENSG00000182718.16|ANXA2|ENST00000396024.7|143450-HCT-15_SNP_RNA-V98L-and-143450-HCT-15_SNP_EXOME-V98L|98l|	ANXA2_p.V98L	98	HCT-15	CAM	FALSE	TRUE	TRUE	TRUE
SCDIHETTFNSIMK	E	K	FALSE	FALSE	S	14	1	14	2	1	0	NA	A5A3E0	A5A3E0	1B	972	sp|A5A3E0|ENSG00000196604.12|POTEF|ENST00000409914.6|29568-HCT-15_RARE_EXOME-G973D|973d|;sp|Q6S8J3-1|ENSG00000188219.14|POTEE|ENST00000356920.9|22005-HCT-15_RARE_EXOME-G973D|973d|	POTEF_p.G973D;POTEE_p.G973D	973	HCT-15	CAM	TRUE	FALSE	FALSE	TRUE
SEDGTPAEDGTPAATGGSQPPSLGR	K	R	FALSE	FALSE	K	25	1	25	2	2	0	NA	Q9BQG0	Q9BQG0	1B		sp|Q9BQG0-1|ENSG00000132382.14|MYBBP1A|ENST00000254718.8|162299-HCT-15_SNP_RNA-M1208L-and-162299-HCT-15_SNP_EXOME-M1208L|1208l|	MYBBP1A_p.M1208L	1208	HCT-15	CAM	FALSE	TRUE	TRUE	TRUE
SELPLDPLPLPTEEGNPLLK	K	K	FALSE	FALSE	H	20	13	32	2	11	0	NA	Q15758	Q15758	1B		sp|Q15758-1|ENSG00000105281.12|SLC1A5|ENST00000542575.6|183329-HCT-15_SNP_RNA-V512L-and-183329-HCT-15_SNP_EXOME-V512L|512l|	SLC1A5_p.V512L	512	HCT-15	CAM	FALSE	TRUE	TRUE	TRUE
SFQGPVLIGSSHGGVNIEDVAAETPEAIIKEPIDIEEGIKK	R	K	FALSE	FALSE	E	41	14	54	5	1	0	NA	Q9P2R7	Q9P2R7	1B		sp|Q9P2R7-1|ENSG00000136143.15|SUCLA2|ENST00000643584.1|129620-HCT-15_SNP_RNA-S199T-and-129620-HCT-15_SNP_EXOME-S199T|199t|	SUCLA2_p.S199T	199	HCT-15	CAM	FALSE	TRUE	TRUE	TRUE
SGAHVVVTGPPNAGK	R	K	FALSE	FALSE	S	15	5	19	3	1	0	NA	Q969Y2	Q969Y2	1B		sp|Q969Y2-1|ENSG00000130299.16|GTPBP3|ENST00000324894.12|174357-HCT-15_SNP_RNA-V250A-and-174357-HCT-15_SNP_EXOME-V250A|250a|	GTPBP3_p.V250A	250	HCT-15	CAM	FALSE	TRUE	TRUE	TRUE
SGHIQILLR	K	R	FALSE	FALSE	A	9	6	14	2	3	0	NA	Q9Y3A6	Q9Y3A6	1B		sp|Q9Y3A6-1|ENSG00000117500.12|TMED5|ENST00000370282.7|13293-HCT-15_SNP_RNA-T175I-and-13293-HCT-15_SNP_EXOME-T175I|175i|	TMED5_p.T175I	175	HCT-15	CAM	FALSE	TRUE	TRUE	TRUE
SGMSLTQDMLNGELKK	R	K	FALSE	FALSE	L	16	11	26	3	1	0	NA	Q5JPH6	Q5JPH6	1B		sp|Q5JPH6-1|ENSG00000103356.15|EARS2|ENST00000449606.5|152798-HCT-15_SNP_RNA-S457G-and-152798-HCT-15_SNP_EXOME-S457G|457g|	EARS2_p.S457G	457	HCT-15	CAM	FALSE	TRUE	TRUE	TRUE
SGVDTDSSYFK	K	K	FALSE	FALSE	L	11	10	20	2	1	0	NA	Q9Y394	Q9Y394	1B		sp|Q9Y394-1|ENSG00000100612.13|DHRS7|ENST00000216500.9|136144-HCT-15_RARE_EXOME-A326T|326t|	DHRS7_p.A326T	326	HCT-15	CAM	TRUE	FALSE	FALSE	TRUE
SIASDNQPTVTIK	F	K	FALSE	FALSE	V	13	15	27	2	1	0	NA	P11021	P11021	1B		sp|P11021|ENSG00000044574.7|HSPA5|ENST00000324460.6|95250-HCT-15_RARE_RNA-T453I-and-95250-HCT-15_RARE_EXOME-T453I|453i|	HSPA5_p.T453I	453	HCT-15	CAM	TRUE	FALSE	TRUE	TRUE
SIDPGLKEDTLEFLIK	R	K	FALSE	FALSE	V	16	1	16	3	1	0	NA	Q15021	Q15021	1B		sp|Q15021|ENSG00000010292.12|NCAPD2|ENST00000315579.9|115838-HCT-15_SNP_RNA-Q83E-and-115838-HCT-15_SNP_EXOME-Q83E|83e|	NCAPD2_p.Q83E	83	HCT-15	CAM	FALSE	TRUE	TRUE	TRUE
SILGLPLLPEDSIK	R	K	FALSE	FALSE	V	14	1	14	2	4	0	NA	Q5VSL9	Q5VSL9	1B		sp|Q5VSL9-1|ENSG00000143093.14|STRIP1|ENST00000369795.7|4699-HCT-15_RARE_RNA-P319L-and-4699-HCT-15_RARE_EXOME-P319L|319l|	STRIP1_p.P319L	319	HCT-15	CAM	TRUE	FALSE	TRUE	TRUE
SLESNLEGLAGVLESDLPNYK	C	K	TRUE	FALSE	S	21	10	30	2	4	0	NA	Q09161	Q09161	1B		sp|Q09161|ENSG00000136937.12|NCBP1|ENST00000375147.7|91061-HCT-15_RARE_RNA-A59S-and-91061-HCT-15_RARE_EXOME-A59S|59s|	NCBP1_p.A59S	59	HCT-15	CAM	TRUE	FALSE	TRUE	TRUE
SNYSFEKPFLWLAR	K	R	FALSE	FALSE	K	14	15	28	2, 3	2	0	NA	P62826	P62826	1B		sp|P62826|ENSG00000132341.11|RAN|ENST00000543796.5|121053-HCT-15_RARE_RNA-N156S-and-121053-HCT-15_RARE_EXOME-N156S|156s|	RAN_p.N156S	156	HCT-15	CAM	TRUE	FALSE	TRUE	TRUE
SPADPTDLGGQTSPR	R	R	FALSE	FALSE	R	15	1	15	2	1	0	NA	O60504	O60504	1B		sp|O60504-1|ENSG00000120896.13|SORBS3|ENST00000240123.11|82050-HCT-15_SNP_RNA-I556T-and-82050-HCT-15_SNP_EXOME-I556T|556t|	SORBS3_p.I556T	556	HCT-15	CAM	FALSE	TRUE	TRUE	TRUE
SPMVPLPMPK	R	K	FALSE	FALSE	K	10	9	18	2	4	0	3M(15.9949)	P43155	P43155	1B		sp|P43155-1|ENSG00000095321.16|CRAT|ENST00000318080.6|95526-HCT-15_SNP_RNA-L372M-and-95526-HCT-15_SNP_EXOME-L372M|372m|	CRAT_p.L372M	372	HCT-15	CAM	FALSE	TRUE	TRUE	TRUE
SPVLHFYVRPSGHEGAASGHTR	M	R	FALSE	FALSE	R	22	1	22	5	1	0	N-term(42.0106)	O15067	O15067	1B		sp|O15067|ENSG00000178921.13|PFAS|ENST00000314666.10|156540-HCT-15_SNP_RNA-P19S-and-156540-HCT-15_SNP_EXOME-P19S|19s|	PFAS_p.P19S	19	HCT-15	CAM	FALSE	TRUE	TRUE	TRUE
SQIFSIASDNQPTVTIK	K	K	FALSE	FALSE	V	17	11	27	2	8	0	NA	P11021	P11021	1B		sp|P11021|ENSG00000044574.7|HSPA5|ENST00000324460.6|95250-HCT-15_RARE_RNA-T453I-and-95250-HCT-15_RARE_EXOME-T453I|453i|	HSPA5_p.T453I	453	HCT-15	CAM	TRUE	FALSE	TRUE	TRUE
SQNKEDYDGLKEEFR	R	R	FALSE	FALSE	K	15	3	17	3, 4	2	0	NA	P78417	P78417	1B		sp|P78417-1|ENSG00000148834.12|GSTO1|ENST00000369713.9|98861-HCT-15_SNP_RNA-A140D-and-98861-HCT-15_SNP_EXOME-A140D|140d|	GSTO1_p.A140D	140	HCT-15	CAM	FALSE	TRUE	TRUE	TRUE
SRELDECFAQANDQMETLDSLIR	R	R	FALSE	FALSE	E	23	1	23	3, 4	2	0	7C(56.0374)	P15924	P15924	1B	110	sp|P15924-1|ENSG00000096696.13|DSP|ENST00000379802.7|62914-HCT-15_RARE_RNA-I120T-and-62914-HCT-15_RARE_EXOME-I120T|120t|	DSP_p.I120T	120	HCT-15	CAM	TRUE	FALSE	TRUE	TRUE
SSGSYESASRSSLFAQINQGESITHALK	T	K	FALSE	FALSE	H	28	1	28	3	3	0	NA	Q01518	Q01518	1B		sp|Q01518-1|ENSG00000131236.16|CAP1|ENST00000372797.7|2315-HCT-15_RARE_EXOME-I245S,2315-HCT-15_RARE_EXOME-C247G|245s247g|	CAP1_p.I245S,C247G	245247	HCT-15	CAM	TRUE	FALSE	FALSE	TRUE
SSSSSSQPEHIAMLVSTAASPSLIK	K	K	FALSE	FALSE	E	25	7	31	2, 3	3	0	13M(15.9949)	P42166	P42166	1B		sp|P42166-1|ENSG00000120802.13|TMPO|ENST00000266732.8|119626-HCT-15_RARE_RNA-S301I-and-119626-HCT-15_RARE_EXOME-S301I|301i|	TMPO_p.S301I	301	HCT-15	CAM	TRUE	FALSE	TRUE	TRUE
SSSSYHTWNTGTEGSFVER	K	R	FALSE	FALSE	V	19	1	19	3	1	0	NA	Q8TEQ6	Q8TEQ6	1B		sp|Q8TEQ6|ENSG00000082516.8|GEMIN5|ENST00000285873.7|61805-HCT-15_SNP_RNA-P1155S-and-61805-HCT-15_SNP_EXOME-P1155S|1155s|	GEMIN5_p.P1155S	1155	HCT-15	CAM	FALSE	TRUE	TRUE	TRUE
STHSLAILGPENPK	K	K	FALSE	FALSE	L	14	1	14	3	2	0	NA	Q5JRX3	Q5JRX3	1B		sp|Q5JRX3-1|ENSG00000107959.15|PITRM1|ENST00000224949.8|99606-HCT-15_SNP_RNA-G1017S-and-99606-HCT-15_SNP_EXOME-G1017S|1017s|	PITRM1_p.G1017S	1017	HCT-15	CAM	FALSE	TRUE	TRUE	TRUE
STIQNLQSFNPFADATKGDDLLPAGTEDYIHIR	M	R	FALSE	FALSE	L	33	2	34	3	1	0	N-term(42.0106)	O60739	O60739	1B		sp|O60739|ENSG00000114784.3|EIF1B|ENST00000232905.3|34138-HCT-15_RARE_EXOME-D11N|11n|	EIF1B_p.D11N	11	HCT-15	CAM	TRUE	FALSE	FALSE	TRUE
SVGGSGVGSFGDNLVTR	R	R	FALSE	FALSE	S	17	6	22	2	3	0	NA	P02545	P02545	1B		sp|P02545-1|ENSG00000160789.19|LMNA|ENST00000368300.8|6152-HCT-15_RARE_RNA-G634V-and-6152-HCT-15_RARE_EXOME-G634V|634v|	LMNA_p.G634V	634	HCT-15	CAM	TRUE	FALSE	TRUE	TRUE
SVVSDVPEELDFLVPK	K	K	FALSE	FALSE	A	16	15	30	2	2	0	NA	Q14966	Q14966	1B		sp|Q14966-1|ENSG00000075292.18|ZNF638|ENST00000264447.8|20090-HCT-15_SNP_RNA-A1912V-and-20090-HCT-15_SNP_EXOME-A1912V|1912v|	ZNF638_p.A1912V	1912	HCT-15	CAM	FALSE	TRUE	TRUE	TRUE
SWTAADMAAQTTK	R	K	FALSE	FALSE	R	13	1	13	2	1	0	NA	P04439	P04439	1B		sp|P04439|ENSG00000206503.12|HLA-A|ENST00000396634.5|63676-HCT-15_RARE_EXOME-I166T|166t|	HLA-A_p.I166T	166	HCT-15	CAM	TRUE	FALSE	FALSE	TRUE
TASTPTHPQTGGGLEPQANGETPQVAVIVRPDDR	R	R	FALSE	FALSE	S	34	14	47	4	1	0	NA	Q04637	Q04637	1B		sp|Q04637-1|ENSG00000114867.20|EIF4G1|ENST00000346169.6|38371-HCT-15_RARE_EXOME-P208H|208h|	EIF4G1_p.P208H	208	HCT-15	CAM	TRUE	FALSE	FALSE	TRUE
TATLQQAQEVHEK	K	K	FALSE	FALSE	L	13	18	30	2, 3	13	0	NA	P60174	P60174	1B		sp|P60174-3|ENSG00000111669.14|TPI1|ENST00000229270.8|115949-HCT-15_RARE_EXOME-P216L|216l|	TPI1_p.P216L	216	HCT-15	CAM	TRUE	FALSE	FALSE	TRUE
TATLQQAQEVHEKLR	K	R	FALSE	FALSE	G	15	18	32	3, 4	7	0	NA	P60174	P60174	1B		sp|P60174-3|ENSG00000111669.14|TPI1|ENST00000229270.8|115949-HCT-15_RARE_EXOME-P216L|216l|	TPI1_p.P216L	216	HCT-15	CAM	TRUE	FALSE	FALSE	TRUE
TAYSYLYEAFEGYDSIDSPK	K	K	FALSE	FALSE	A	20	1	20	2	1	0	NA	O00231	O00231	1B		sp|O00231-1|ENSG00000108671.9|PSMD11|ENST00000261712.7|157969-HCT-15_RARE_RNA-F232L-and-157969-HCT-15_RARE_EXOME-F232L|232l|	PSMD11_p.F232L	232	HCT-15	CAM	TRUE	FALSE	TRUE	TRUE
TDVPIYDGSWVEWYMR	K	R	FALSE	FALSE	A	16	1	16	2	4	0	NA	P25325	P25325	1B		sp|P25325-1|ENSG00000128309.16|MPST|ENST00000401419.7|193484-HCT-15_RARE_RNA-P267T-and-193484-HCT-15_RARE_EXOME-P267T|267t|	MPST_p.P267T	267	HCT-15	CAM	TRUE	FALSE	TRUE	TRUE
TEEAILISLAALQPGLTQAGAR	R	R	FALSE	FALSE	H	22	1	22	2	3	0	NA	Q5T280	Q5T280	1B		sp|Q5T280|ENSG00000198917.12|C9orf114|ENST00000361256.9|95497-HCT-15_SNP_RNA-I369T-and-95497-HCT-15_SNP_EXOME-I369T|369t|	C9orf114_p.I369T	369	HCT-15	CAM	FALSE	TRUE	TRUE	TRUE
TEGPSPALLEETPLEPAAGPK	K	K	FALSE	FALSE	A	21	1	21	2	3	0	NA	O95359	O95359	1B		sp|O95359-4|ENSG00000138162.18|TACC2|ENST00000369005.5|99233-HCT-15_SNP_RNA-V2197A-and-99233-HCT-15_SNP_EXOME-V2197A|2197a|	TACC2_p.V2197A	2197	HCT-15	CAM	FALSE	TRUE	TRUE	TRUE
TGGSAQPETPYSGHGLLIDSLVLLPR	R	R	FALSE	FALSE	V	26	1	26	3	1	0	NA	P55268	P55268	1B		sp|P55268|ENSG00000172037.13|LAMB2|ENST00000418109.5|40862-HCT-15_RARE_RNA-P711H-and-40862-HCT-15_RARE_EXOME-P711H|711h|	LAMB2_p.P711H	711	HCT-15	CAM	TRUE	FALSE	TRUE	TRUE
TGSSAQEAASGVALGEAPDHSYESLR	L	R	FALSE	FALSE	V	26	19	44	3	2	0	NA	Q13011	Q13011	1B		sp|Q13011|ENSG00000104823.8|ECH1|ENST00000221418.8|182284-HCT-15_SNP_RNA-E41A-and-182284-HCT-15_SNP_EXOME-E41A|41a|	ECH1_p.E41A	41	HCT-15	CAM	FALSE	TRUE	TRUE	TRUE
THVTHHPVSDHEATLR	K	R	FALSE	FALSE	C	16	1	16	4	1	0	NA	P10321	P10321	1B		sp|P01889|ENSG00000234745.10|HLA-B|ENST00000412585.6|68124-HCT-15_SNP_RNA-I218V-and-68124-HCT-15_SNP_EXOME-I218V|218v|;sp|P10321|ENSG00000204525.16|HLA-C|ENST00000376228.9|68111-HCT-15_SNP_EXOME-L218V|218v|	HLA-B_p.I218V;HLA-C_p.L218V	218	HCT-15	CAM	FALSE	TRUE	TRUE	TRUE
TIEEIYMSSIESLAEVTAR	K	R	FALSE	FALSE	C	19	6	24	2	1	0	NA	Q8IWE2	Q8IWE2	1B		sp|Q8IWE2-1|ENSG00000197712.11|FAM114A1|ENST00000358869.4|46248-HCT-15_SNP_EXOME-V443I|443i|	FAM114A1_p.V443I	443	HCT-15	CAM	FALSE	TRUE	FALSE	TRUE
TLDPFETMLK	K	K	FALSE	FALSE	S	10	10	19	2	2	0	NA	Q6UW02	Q6UW02	1B		sp|Q6UW02-1|ENSG00000119004.15|CYP20A1|ENST00000356079.8|23869-HCT-15_SNP_EXOME-S97L|97l|	CYP20A1_p.S97L	97	HCT-15	CAM	FALSE	TRUE	FALSE	TRUE
TLHEVSLQESIR	R	R	FALSE	FALSE	Y	12	1	12	3	1	0	NA	Q9H0A0	Q9H0A0	1B		sp|Q9H0A0-1|ENSG00000135372.8|NAT10|ENST00000257829.7|104402-HCT-15_SNP_RNA-Y461H-and-104402-HCT-15_SNP_EXOME-Y461H|461h|	NAT10_p.Y461H	461	HCT-15	CAM	FALSE	TRUE	TRUE	TRUE
TLNEADCATIPPAIR	K	R	FALSE	FALSE	S	15	8	22	3	2	0	7C(56.0374)	P31040	P31040	1B	654	sp|P31040-1|ENSG00000073578.16|SDHA|ENST00000264932.10|53319-HCT-15_SNP_RNA-V657I-and-53319-HCT-15_SNP_EXOME-V657I|657i|	SDHA_p.V657I	657	HCT-15	CAM	FALSE	TRUE	TRUE	TRUE
TLQALEFHTVPFQLLTR	K	R	FALSE	FALSE	Y	17	32	48	2, 3	4	0	NA	Q08380	Q08380	1B		sp|Q08380|ENSG00000108679.12|LGALS3BP|ENST00000262776.7|167811-HCT-15_RARE_RNA-A392T-and-167811-HCT-15_RARE_EXOME-A392T|392t|	LGALS3BP_p.A392T	392	HCT-15	CAM	TRUE	FALSE	TRUE	TRUE
TMQGSEVVSVLK	K	K	FALSE	FALSE	S	12	19	30	2	6	0	2M(15.9949)	Q8WUM4	Q8WUM4	1B		sp|Q8WUM4-1|ENSG00000170248.13|PDCD6IP|ENST00000307296.7|33852-HCT-15_SNP_EXOME-N550S|550s|	PDCD6IP_p.N550S	550	HCT-15	CAM	FALSE	TRUE	FALSE	TRUE
TNVFAPDFIAGVSPFVENDISSR	K	R	FALSE	FALSE	S	23	1	23	2	2	0	NA	Q9ULX3	Q9ULX3	1B		sp|Q9ULX3|ENSG00000141101.12|NOB1|ENST00000268802.9|154597-HCT-15_SNP_RNA-Y366F-and-154597-HCT-15_SNP_EXOME-Y366F|366f|	NOB1_p.Y366F	366	HCT-15	CAM	FALSE	TRUE	TRUE	TRUE
TPVLFDVYEIK	K	K	FALSE	FALSE	E	11	10	20	2	9	0	NA	P50995	P50995	1B		sp|P50995-1|ENSG00000122359.17|ANXA11|ENST00000372231.7|101453-HCT-15_SNP_RNA-I278V-and-101453-HCT-15_SNP_EXOME-I278V|278v|	ANXA11_p.I278V	278	HCT-15	CAM	FALSE	TRUE	TRUE	TRUE
TPVLFDVYEIKEAIK	K	K	FALSE	FALSE	G	15	10	24	3	1	0	NA	P50995	P50995	1B		sp|P50995-1|ENSG00000122359.17|ANXA11|ENST00000372231.7|101453-HCT-15_SNP_RNA-I278V-and-101453-HCT-15_SNP_EXOME-I278V|278v|	ANXA11_p.I278V	278	HCT-15	CAM	FALSE	TRUE	TRUE	TRUE
TQNKEESYDFFK	K	K	FALSE	FALSE	S	12	1	12	3	1	0	NA	Q9UDY2	Q9UDY2	1B		sp|Q9UDY2-1|ENSG00000119139.18|TJP2|ENST00000377245.8|90437-HCT-15_SNP_RNA-S1010F-and-90437-HCT-15_SNP_EXOME-S1010F|1010f|	TJP2_p.S1010F	1010	HCT-15	CAM	FALSE	TRUE	TRUE	TRUE
TSELPPLK	K	K	FALSE	FALSE	N	8	18	25	2	4	0	NA	Q14914	Q14914	1B		sp|Q14914-1|ENSG00000106853.18|PTGR1|ENST00000309195.9|94852-HCT-15_SNP_RNA-A27S-and-94852-HCT-15_SNP_EXOME-A27S|27s|	PTGR1_p.A27S	27	HCT-15	CAM	FALSE	TRUE	TRUE	TRUE
TTGIVMDSGDGVTHTVPIYEGYALPHAILCLDLAGR	R	R	FALSE	FALSE	D	36	32	67	4, 5	6	0	30C(56.0374)	P60709	P60709	1B	177	sp|P60709|ENSG00000075624.14|ACTB|ENST00000646664.1|76882-HCT-15_RARE_RNA-R177C-and-76882-HCT-15_RARE_EXOME-R177C|177c|	ACTB_p.R177C	177	HCT-15	CAM	TRUE	FALSE	TRUE	TRUE
TVASPGVSVEEAVEQIDIGGVTLLR	K	R	FALSE	FALSE	A	25	14	38	2	11	0	NA	P31939	P31939	1B		sp|P31939-1|ENSG00000138363.14|ATIC|ENST00000236959.13|24162-HCT-15_SNP_RNA-T116S-and-24162-HCT-15_SNP_EXOME-T116S|116s|	ATIC_p.T116S	116	HCT-15	CAM	FALSE	TRUE	TRUE	TRUE
TVNTSSIATSSMK	C	K	TRUE	FALSE	G	13	1	13	2	1	0	NA	Q96KR1	Q96KR1	1B		sp|Q96KR1|ENSG00000056097.15|ZFR|ENST00000265069.12|58681-HCT-15_RARE_RNA-V461I-and-58681-HCT-15_RARE_EXOME-V461I|461i|	ZFR_p.V461I	461	HCT-15	CAM	TRUE	FALSE	TRUE	TRUE
TVTVSDLYAMNFEPR	C	R	TRUE	FALSE	A	15	1	15	2	6	0	NA	P16083	P16083	1B		sp|P16083|ENSG00000124588.19|NQO2|ENST00000338130.6|62795-HCT-15_SNP_RNA-L47F-and-62795-HCT-15_SNP_EXOME-L47F|47f|	NQO2_p.L47F	47	HCT-15	CAM	FALSE	TRUE	TRUE	TRUE
VDKGVVPLAGTNGETTIQGLDGLSER	K	R	FALSE	FALSE	C	26	3	28	3	10	0	NA	P04075	P04075	1B		sp|P04075-1|ENSG00000149925.18|ALDOA|ENST00000569545.5|147948-HCT-15_RARE_EXOME-T125I|125i|	ALDOA_p.T125I	125	HCT-15	CAM	TRUE	FALSE	FALSE	TRUE
VEFATLQEALAHALMEK	R	K	FALSE	FALSE	E	17	1	17	2, 3	7	0	15M(15.9949)	Q14980	Q14980	1B		sp|Q14980-1|ENSG00000137497.17|NUMA1|ENST00000393695.7|113171-HCT-15_SNP_RNA-T1057M-and-113171-HCT-15_SNP_EXOME-T1057M|1057m|	NUMA1_p.T1057M	1057	HCT-15	CAM	FALSE	TRUE	TRUE	TRUE
VFSVAELQAR	R	R	FALSE	FALSE	L	10	25	34	2	1	0	NA	Q8IUR0	Q8IUR0	1B		sp|Q8IUR0|ENSG00000181029.8|TRAPPC5|ENST00000596148.2|173134-HCT-15_SNP_RNA-S52A-and-173134-HCT-15_SNP_EXOME-S52A|52a|	TRAPPC5_p.S52A	52	HCT-15	CAM	FALSE	TRUE	TRUE	TRUE
VGEAGLLSVNCSEAGPGALGLEAVSDSGTK	K	K	FALSE	FALSE	A	30	1	30	3	5	0	11C(56.0374)	O75369	O75369	1B	1158	sp|O75369-1|ENSG00000136068.14|FLNB|ENST00000295956.8|35308-HCT-15_SNP_RNA-D1157N-and-35308-HCT-15_SNP_EXOME-D1157N|1157n|	FLNB_p.D1157N	1157	HCT-15	CAM	FALSE	TRUE	TRUE	TRUE
VIDGMTVVHSIELQATDGHDRPLTSC	K	C	FALSE	TRUE	S	26	3	28	5	1	0	26C(56.0374)	P45877	P45877	1B	191	sp|P45877|ENSG00000168938.5|PPIC|ENST00000306442.4|60516-HCT-15_SNP_RNA-N190S-and-60516-HCT-15_SNP_EXOME-N190S|190s|	PPIC_p.N190S	190	HCT-15	CAM	FALSE	TRUE	TRUE	TRUE
VIELAPAGMPTQQQVPFLSVGGDIGVR	R	R	FALSE	FALSE	T	27	20	46	2	1	0	NA	Q8N6R0	Q8N6R0	1B		sp|Q8N6R0-5|ENSG00000010165.19|METTL13|ENST00000361735.3|7004-HCT-15_SNP_RNA-M359I-and-7004-HCT-15_SNP_EXOME-M359I|359i|	METTL13_p.M359I	359	HCT-15	CAM	FALSE	TRUE	TRUE	TRUE
VILESPWPSSTR	K	R	FALSE	FALSE	S	12	14	25	2	1	0	NA	Q5VZ89	Q5VZ89	1B		sp|Q5VZ89-1|ENSG00000137145.20|DENND4C|ENST00000602925.5|89627-HCT-15_RARE_EXOME-V865I|865i|	DENND4C_p.V865I	865	HCT-15	CAM	TRUE	FALSE	FALSE	TRUE
VLQQLTEEAALDEASGFNIPAEQASRPWTQPR	R	R	FALSE	FALSE	G	32	19	50	3	3	0	NA	Q96K21	Q96K21	1B		sp|Q96K21-1|ENSG00000166140.17|ZFYVE19|ENST00000355341.8|138875-HCT-15_SNP_RNA-S376A-and-138875-HCT-15_SNP_EXOME-S376A|376a|	ZFYVE19_p.S376A	376	HCT-15	CAM	FALSE	TRUE	TRUE	TRUE
VMQVVDEKLPGLLGNFPGPFEEEMK	K	K	FALSE	FALSE	G	25	1	25	3	2	0	NA	Q13510	Q13510	1B		sp|Q13510-1|ENSG00000104763.18|ASAH1|ENST00000637790.1|85579-HCT-15_SNP_RNA-I93V-and-85579-HCT-15_SNP_EXOME-I93V|93v|	ASAH1_p.I93V	93	HCT-15	CAM	FALSE	TRUE	TRUE	TRUE
VNLEEQLKETVEK	K	K	FALSE	FALSE	Y	13	9	21	3	3	0	NA	Q9HAV7	Q9HAV7	1B		sp|Q9HAV7|ENSG00000109519.12|GRPEL1|ENST00000264954.4|49557-HCT-15_RARE_RNA-K66N-and-49557-HCT-15_RARE_EXOME-K66N|66n|	GRPEL1_p.K66N	66	HCT-15	CAM	TRUE	FALSE	TRUE	TRUE
VPAPEEEMDECEQALAAEPK	A	K	FALSE	FALSE	A	20	10	29	3	1	0	11C(56.0374)	P26641	P26641	1B	266	sp|P26641-1|ENSG00000254772.9|EEF1G|ENST00000329251.4|112031-HCT-15_RARE_RNA-A256V-and-112031-HCT-15_RARE_EXOME-A256V|256v|	EEF1G_p.A256V	256	HCT-15	CAM	TRUE	FALSE	TRUE	TRUE
VQVLAAQLLSEMK	R	K	FALSE	FALSE	L	13	11	23	2	2	0	NA	Q6P9B6	Q6P9B6	1B		sp|Q6P9B6|ENSG00000140950.15|TLDC1|ENST00000343629.10|155273-HCT-15_SNP_RNA-D172E-and-155273-HCT-15_SNP_EXOME-D172E|172e|	TLDC1_p.D172E	172	HCT-15	CAM	FALSE	TRUE	TRUE	TRUE
VSHLPLVEELR	R	R	FALSE	FALSE	S	11	1	11	3	4	0	NA	P49736	P49736	1B		sp|P49736|ENSG00000073111.13|MCM2|ENST00000265056.11|36591-HCT-15_RARE_RNA-I285V-and-36591-HCT-15_RARE_EXOME-I285V|285v|	MCM2_p.I285V	285	HCT-15	CAM	TRUE	FALSE	TRUE	TRUE
VSIAELAQASNSLITWGR	R	R	FALSE	FALSE	E	18	5	22	2	3	0	NA	Q96HY6	Q96HY6	1B		sp|Q96HY6-1|ENSG00000198171.12|DDRGK1|ENST00000354488.7|187610-HCT-15_SNP_RNA-A303T-and-187610-HCT-15_SNP_EXOME-A303T|303t|	DDRGK1_p.A303T	303	HCT-15	CAM	FALSE	TRUE	TRUE	TRUE
VSLGGEPPSEAQPHPEVPLGGLSEAADSLR	R	R	FALSE	FALSE	E	30	5	34	3	1	0	NA	Q9BVQ7	Q9BVQ7	1B		sp|Q9BVQ7-1|ENSG00000171763.18|SPATA5L1|ENST00000305560.10|139325-HCT-15_RARE_EXOME-Q197H|197h|	SPATA5L1_p.Q197H	197	HCT-15	CAM	TRUE	FALSE	FALSE	TRUE
VWHLVQPTDEVDEGK	R	K	FALSE	FALSE	S	15	1	15	3	3	0	NA	O15031	O15031	1B		sp|O15031|ENSG00000196576.14|PLXNB2|ENST00000359337.8|196445-HCT-15_SNP_RNA-R1593Q-and-196445-HCT-15_SNP_EXOME-R1593Q|1593q|	PLXNB2_p.R1593Q	1593	HCT-15	CAM	FALSE	TRUE	TRUE	TRUE
WEYGSILPNALR	R	R	FALSE	FALSE	F	12	6	17	2	1	0	NA	Q14691	Q14691	1B		sp|Q14691|ENSG00000101003.9|GINS1|ENST00000262460.4|185728-HCT-15_SNP_RNA-V97I-and-185728-HCT-15_SNP_EXOME-V97I|97i|	GINS1_p.V97I	97	HCT-15	CAM	FALSE	TRUE	TRUE	TRUE
WGQIILK	R	K	FALSE	FALSE	N	7	5	11	2	1	0	NA	Q9H4A4	Q9H4A4	1B		sp|Q9H4A4|ENSG00000176393.10|RNPEP|ENST00000295640.8|7673-HCT-15_SNP_RNA-V579I-and-7673-HCT-15_SNP_EXOME-V579I|579i|	RNPEP_p.V579I	579	HCT-15	CAM	FALSE	TRUE	TRUE	TRUE
WLSTSIPEAQWHSSLSR	R	R	FALSE	FALSE	T	17	6	22	2, 3	4	0	NA	P49327	P49327	1B		sp|P49327|ENSG00000169710.8|FASN|ENST00000306749.3|168265-HCT-15_SNP_RNA-A727S-and-168265-HCT-15_SNP_EXOME-A727S|727s|	FASN_p.A727S	727	HCT-15	CAM	FALSE	TRUE	TRUE	TRUE
WQQLNPDAPEALQAPAQVPSLFR	K	R	FALSE	FALSE	N	23	1	23	2	2	0	NA	Q9UKK3	Q9UKK3	1B		sp|Q9UKK3|ENSG00000102699.5|PARP4|ENST00000381989.3|129045-HCT-15_SNP_RNA-L1080R-and-129045-HCT-15_SNP_EXOME-L1080R,129045-HCT-15_RARE_RNA-V1065A-and-129045-HCT-15_RARE_EXOME-V1065A|1065a1080r|	PARP4_p.L1080R,V1065A	10801065	HCT-15	CAM	TRUE	TRUE	TRUE	TRUE
YASICQQNGIVPIVEPEILPDGGHDLK	R	K	FALSE	FALSE	R	27	1	27	3, 4	15	0	5C(56.0374)	P04075	P04075	1B	178	sp|P04075-1|ENSG00000149925.18|ALDOA|ENST00000569545.5|147948-HCT-15_RARE_RNA-D196G-and-147948-HCT-15_RARE_EXOME-D196G|196g|	ALDOA_p.D196G	196	HCT-15	CAM	TRUE	FALSE	TRUE	TRUE
YASICQQNGIVPIVEPEILPDGGHDLKR	R	R	FALSE	FALSE	C	28	1	28	5	7	0	5C(56.0374)	P04075	P04075	1B	178	sp|P04075-1|ENSG00000149925.18|ALDOA|ENST00000569545.5|147948-HCT-15_RARE_RNA-D196G-and-147948-HCT-15_RARE_EXOME-D196G|196g|	ALDOA_p.D196G	196	HCT-15	CAM	TRUE	FALSE	TRUE	TRUE
YCNFDIPK	K	K	FALSE	FALSE	E	8	8	15	2	3	0	2C(56.0374)	Q9Y696	Q9Y696	1B	206	sp|Q9Y696|ENSG00000169504.14|CLIC4|ENST00000374379.8|1394-HCT-15_RARE_RNA-R206C-and-1394-HCT-15_RARE_EXOME-R206C|206c|	CLIC4_p.R206C	206	HCT-15	CAM	TRUE	FALSE	TRUE	TRUE
YELTEISNVDVETQSGK	R	K	FALSE	FALSE	T	17	6	22	2	5	0	NA	Q09666	Q09666	1B		sp|Q09666-1|ENSG00000124942.13|AHNAK|ENST00000378024.8|112027-HCT-15_RARE_RNA-H187Y-and-112027-HCT-15_RARE_EXOME-H187Y|187y|	AHNAK_p.H187Y	187	HCT-15	CAM	TRUE	FALSE	TRUE	TRUE
YEVPLETPR	R	R	FALSE	FALSE	V	9	1	9	2	1	0	NA	P10253	P10253	1B		sp|P10253|ENSG00000171298.12|GAA|ENST00000390015.7|161319-HCT-15_SNP_RNA-H199R-and-161319-HCT-15_SNP_EXOME-H199R|199r|	GAA_p.H199R	199	HCT-15	CAM	FALSE	TRUE	TRUE	TRUE
YFVEAGDMAVR	K	R	FALSE	FALSE	R	11	24	34	2	3	0	NA	P17987	P17987	1B		sp|P17987|ENSG00000120438.11|TCP1|ENST00000321394.11|71383-HCT-15_RARE_RNA-A305D-and-71383-HCT-15_RARE_EXOME-A305D|305d|	TCP1_p.A305D	305	HCT-15	CAM	TRUE	FALSE	TRUE	TRUE
YIELFLNSTPGGGYGMGGSGMGGYGR	R	R	FALSE	FALSE	D	26	1	26	2	1	0	NA	P31942	P31942	1B		sp|P31942-1|ENSG00000096746.17|HNRNPH3|ENST00000265866.11|97564-HCT-15_RARE_RNA-S275Y-and-97564-HCT-15_RARE_EXOME-S275Y|275y|	HNRNPH3_p.S275Y	275	HCT-15	CAM	TRUE	FALSE	TRUE	TRUE
YPDSNPYSLLDNTESDQTADTDASESHHSTNR	K	R	FALSE	FALSE	R	32	11	42	3	2	0	NA	P51114	P51114	1B		sp|P51114-1|ENSG00000114416.17|FXR1|ENST00000357559.8|38038-HCT-15_RARE_RNA-D471Y-and-38038-HCT-15_RARE_EXOME-D471Y|471y|	FXR1_p.D471Y	471	HCT-15	CAM	TRUE	FALSE	TRUE	TRUE
YSAADCPLSSLISEK	K	K	FALSE	FALSE	D	15	1	15	2	2	0	NA	O14867	O14867	1B	646	sp|O14867|ENSG00000156273.15|BACH1|ENST00000286800.7|189897-HCT-15_RARE_RNA-F650S-and-189897-HCT-15_RARE_EXOME-F650S|650s|	BACH1_p.F650S	650	HCT-15	CAM	TRUE	FALSE	TRUE	TRUE
YSFLGSIPGK	R	K	FALSE	FALSE	N	10	18	27	2	1	0	NA	Q9NSE4	Q9NSE4	1B		sp|Q9NSE4|ENSG00000067704.9|IARS2|ENST00000366922.2|8406-HCT-15_RARE_RNA-D887Y-and-8406-HCT-15_RARE_EXOME-D887Y|887y|	IARS2_p.D887Y	887	HCT-15	CAM	TRUE	FALSE	TRUE	TRUE
YSLIDPSSAPELLR	R	R	FALSE	FALSE	L	14	10	23	2	3	0	NA	Q9UDT6	Q9UDT6	1B		sp|Q9UDT6-1|ENSG00000106665.15|CLIP2|ENST00000395060.5|73639-HCT-15_SNP_RNA-R977P-and-73639-HCT-15_SNP_EXOME-R977P|977p|	CLIP2_p.R977P	977	HCT-15	CAM	FALSE	TRUE	TRUE	TRUE
YSRMGIFITMNPGYAGR	L	R	FALSE	FALSE	T	17	1	17	2	1	0	NA	Q8IVF4	Q8IVF4	1B		sp|Q8IVF4-1|ENSG00000197653.15|DNAH10|ENST00000638045.1|120898-HCT-15_RARE_EXOME-D1925Y|1925y|	DNAH10_p.D1925Y	1925	HCT-15	CAM	TRUE	FALSE	FALSE	TRUE
YSTTALLEQLEETTR	R	R	FALSE	FALSE	E	15	1	15	2	1	0	NA	Q53EZ4	Q53EZ4	1B		sp|Q53EZ4-1|ENSG00000138180.15|CEP55|ENST00000371485.7|98397-HCT-15_SNP_RNA-T99A-and-98397-HCT-15_SNP_EXOME-T99A|99a|	CEP55_p.T99A	99	HCT-15	CAM	FALSE	TRUE	TRUE	TRUE
YTLPPGVDPAQVSSSLSPEGTLTVEAPMPK	K	K	FALSE	FALSE	L	30	8	37	2	4	0	NA	P04792	P04792	1B		sp|P04792|ENSG00000106211.8|HSPB1|ENST00000248553.6|73783-HCT-15_RARE_RNA-T151A-and-73783-HCT-15_RARE_EXOME-T151A|151a|	HSPB1_p.T151A	151	HCT-15	CAM	TRUE	FALSE	TRUE	TRUE
AAAAAAAAAPAAAATAATTAATTAATAAQ	K	Q	FALSE	FALSE	-	29	6	34	2	6	0	NA	P37108	P37108	2A		sp|P37108|ENSG00000140319.10|SRP14|ENST00000267884.10|142380-HCT-15_SNP_RNA-P124A-and-142380-HCT-15_SNP_EXOME-P124A|124a|	SRP14_p.P124A	124	HCT-15	IA	FALSE	TRUE	TRUE	TRUE
AAAAAAAAPAATSGSGGCPPAPGLESGAGA	R	A	FALSE	FALSE	V	30	1	30	3	1	0	NA	Q5VZB9	Q5VZB9	2A	74	sp|Q5VZB9|ENSG00000176399.3|DMRTA1|ENST00000325870.2|89715-HCT-15_SNP_EXOME-A65P,89715-HCT-15_RARE_EXOME-V84A|65p84a|	DMRTA1_p.A65P,V84A	65,84	HCT-15	IA	TRUE	TRUE	FALSE	TRUE
AAAVRPDLAQLMNSSGSHK	M	K	FALSE	FALSE	D	19	2	20	3	6	0	12M(15.9949), N-term(42.0106)	Q9BT78	Q9BT78	2A		sp|Q9BT78-1|ENSG00000138663.8|COPS4|ENST00000264389.6|47267-HCT-15_RARE_RNA-Q7P-and-47267-HCT-15_RARE_EXOME-Q7P|7p|	COPS4_p.Q7P	7	HCT-15	IA	TRUE	FALSE	TRUE	TRUE
AAESPDQKDTEGGPKEEESPV	K	V	FALSE	FALSE	-	21	3	23	3	2	0	NA	P53985	P53985	2A		sp|P53985-1|ENSG00000155380.11|SLC16A1|ENST00000369626.7|13866-HCT-15_SNP_RNA-D490E-and-13866-HCT-15_SNP_EXOME-D490E|490e|	SLC16A1_p.D490E	490	HCT-15	IA	FALSE	TRUE	TRUE	TRUE
AAGAAEAAVAAVEEVGSAGHFEELLR	M	R	FALSE	FALSE	L	26	1	26	2	9	0	N-term(42.0106)	O76003	O76003	2A		sp|O76003|ENSG00000108010.11|GLRX3|ENST00000331244.9|99420-HCT-15_SNP_RNA-Q21H-and-99420-HCT-15_SNP_EXOME-Q21H|21h|	GLRX3_p.Q21H	21	HCT-15	IA	FALSE	TRUE	TRUE	TRUE
AALVDLEPCTMDSVR	R	R	FALSE	FALSE	S	15	7	21	2	1	0	9C(57.0215)	Q9BUF5	Q9BUF5	2A	71	sp|Q9BUF5|ENSG00000176014.12|TUBB6|ENST00000317702.9|168837-HCT-15_RARE_RNA-G71C-and-168837-HCT-15_RARE_EXOME-G71C|71c|	TUBB6_p.G71C	71	HCT-15	IA	TRUE	FALSE	TRUE	TRUE
AAVPAPEEEMDECEQALAAEPK	K	K	FALSE	FALSE	A	22	8	29	2	18	0	10M(15.9949), 13C(57.0215)	P26641	P26641	2A	266	sp|P26641-1|ENSG00000254772.9|EEF1G|ENST00000329251.4|112031-HCT-15_RARE_RNA-A256V-and-112031-HCT-15_RARE_EXOME-A256V|256v|	EEF1G_p.A256V	256	HCT-15	IA	TRUE	FALSE	TRUE	TRUE
AEAMDVDTPSGTNSGAGKK	M	K	FALSE	FALSE	R	19	2	20	2	1	0	N-term(42.0106)	P62877	P62877	2A		sp|P62877|ENSG00000100387.8|RBX1|ENST00000216225.8|193858-HCT-15_RARE_RNA-A3E-and-193858-HCT-15_RARE_EXOME-A3E|3e|	RBX1_p.A3E	3	HCT-15	IA	TRUE	FALSE	TRUE	TRUE
AELQTESLTPVPNSGSSVLGSLFK	K	K	FALSE	FALSE	Q	24	1	24	2	1	0	NA	Q6WKZ4	Q6WKZ4	2A		sp|Q6WKZ4-4|ENSG00000156675.15|RAB11FIP1|ENST00000330843.8|86167-HCT-15_SNP_RNA-A651V-and-86167-HCT-15_SNP_EXOME-A651V|651v|	RAB11FIP1_p.A651V	651	HCT-15	IA	FALSE	TRUE	TRUE	TRUE
AFSEYLGTDQSK	K	K	FALSE	FALSE	W	12	22	33	2	7	0	NA	P10768	P10768	2A		sp|P10768|ENSG00000139684.13|ESD|ENST00000378720.7|129610-HCT-15_SNP_RNA-G190E-and-129610-HCT-15_SNP_EXOME-G190E|190e|	ESD_p.G190E	190	HCT-15	IA	FALSE	TRUE	TRUE	TRUE
AGALMMPLVDQLENR	R	R	FALSE	FALSE	L	15	1	15	2	2	0	5M(15.9949)	Q9H583	Q9H583	2A		sp|Q9H583|ENSG00000119285.10|HEATR1|ENST00000366582.7|17722-HCT-15_SNP_RNA-E2017G-and-17722-HCT-15_SNP_EXOME-E2017G|2017g|	HEATR1_p.E2017G	2017	HCT-15	IA	FALSE	TRUE	TRUE	TRUE
AGHQSAAASNLSGLSLQEAQQILNVSK	R	K	FALSE	FALSE	L	27	5	31	3	3	0	NA	Q9Y3D7	Q9Y3D7	2A		sp|Q9Y3D7|ENSG00000217930.7|PAM16|ENST00000318059.7|151848-HCT-15_SNP_RNA-R44Q-and-151848-HCT-15_SNP_EXOME-R44Q|44q|	PAM16_p.R44Q	44	HCT-15	IA	FALSE	TRUE	TRUE	TRUE
AGVAAPATQVVQVTLQSVQR	K	R	FALSE	FALSE	R	20	1	20	2	2	0	NA	Q15149	Q15149	2A		sp|Q15149-1|ENSG00000178209.14|PLEC|ENST00000322810.8|89058-HCT-15_SNP_RNA-A641V-and-89058-HCT-15_SNP_EXOME-A641V|641v|	PLEC_p.A641V	641	HCT-15	IA	FALSE	TRUE	TRUE	TRUE
AHAFVVQQK	K	K	FALSE	FALSE	E	9	1	9	2	6	0	NA	Q15149	Q15149	2A		sp|Q15149-1|ENSG00000178209.14|PLEC|ENST00000322810.8|89058-HCT-15_SNP_RNA-A2194V-and-89058-HCT-15_SNP_EXOME-A2194V|2194v|	PLEC_p.A2194V	2194	HCT-15	IA	FALSE	TRUE	TRUE	TRUE
AHGAPINSLLLVDENVLATGDDTGGIR	K	R	FALSE	FALSE	L	27	1	27	3	2	0	NA	Q9H6Y2	Q9H6Y2	2A		sp|Q9H6Y2-1|ENSG00000120314.18|WDR55|ENST00000358337.9|56558-HCT-15_SNP_RNA-C151R-and-56558-HCT-15_SNP_EXOME-C151R|151r|	WDR55_p.C151R	151	HCT-15	IA	FALSE	TRUE	TRUE	TRUE
AIILDLSCNK	K	K	FALSE	FALSE	L	10	10	19	2	4	0	8C(57.0215)	Q96AG4	Q96AG4	2A	48	sp|Q96AG4|ENSG00000108829.9|LRRC59|ENST00000225972.7|166134-HCT-15_RARE_RNA-T42I-and-166134-HCT-15_RARE_EXOME-T42I|42i|	LRRC59_p.T42I	42	HCT-15	IA	TRUE	FALSE	TRUE	TRUE
ALLNAESLPTHR	R	R	FALSE	FALSE	K	12	7	18	3	1	0	NA	Q9NVH0	Q9NVH0	2A		sp|Q9NVH0-1|ENSG00000081177.18|EXD2|ENST00000409018.7|132538-HCT-15_SNP_RNA-Q518H-and-132538-HCT-15_SNP_EXOME-Q518H|518h|	EXD2_p.Q518H	518	HCT-15	IA	FALSE	TRUE	TRUE	TRUE
ALTAQLPVLPR	R	R	FALSE	FALSE	S	11	21	31	2	2	0	NA	Q96GK7	Q96GK7	2A		sp|Q96GK7|ENSG00000115042.9|FAHD2A|ENST00000447036.5|20778-HCT-15_RARE_EXOME-A85T|85t|	FAHD2A_p.A85T	85	HCT-15	IA	TRUE	FALSE	FALSE	TRUE
ANFSPFGNSQGPSR	K	R	FALSE	FALSE	V	14	1	14	2	1	0	NA	Q9H2M9	Q9H2M9	2A		sp|Q9H2M9-1|ENSG00000118873.15|RAB3GAP2|ENST00000358951.6|17140-HCT-15_SNP_RNA-D448N-and-17140-HCT-15_SNP_EXOME-D448N|448n|	RAB3GAP2_p.D448N	448	HCT-15	IA	FALSE	TRUE	TRUE	TRUE
APPMPGPVPEAAQPFLFTPR	K	R	FALSE	FALSE	G	20	1	20	2	3	0	NA	Q7Z406	Q7Z406	2A		sp|Q7Z406-1|ENSG00000105357.16|MYH14|ENST00000376970.6|177517-HCT-15_RARE_RNA-R16M-and-177517-HCT-15_RARE_EXOME-R16M|16m|	MYH14_p.R16M	16	HCT-15	IA	TRUE	FALSE	TRUE	TRUE
APSPLYSVEFSEEPFGVIVHR	R	R	FALSE	FALSE	Q	21	1	21	3	5	0	NA	P10253	P10253	2A		sp|P10253|ENSG00000171298.12|GAA|ENST00000390015.7|161319-HCT-15_SNP_RNA-R223H-and-161319-HCT-15_SNP_EXOME-R223H|223h|	GAA_p.R223H	223	HCT-15	IA	FALSE	TRUE	TRUE	TRUE
AQEALLQLSQALSLMETVK	R	K	FALSE	FALSE	Q	19	1	19	2	5	0	NA	O60664	O60664	2A		sp|O60664-1|ENSG00000105355.8|PLIN3|ENST00000221957.8|179418-HCT-15_SNP_RNA-V275A-and-179418-HCT-15_SNP_EXOME-V275A|275a|	PLIN3_p.V275A	275	HCT-15	IA	FALSE	TRUE	TRUE	TRUE
AQEALLQLSQALSLMETVKQGVDQK	R	K	FALSE	FALSE	L	25	1	25	3	1	0	NA	O60664	O60664	2A		sp|O60664-1|ENSG00000105355.8|PLIN3|ENST00000221957.8|179418-HCT-15_SNP_RNA-V275A-and-179418-HCT-15_SNP_EXOME-V275A|275a|	PLIN3_p.V275A	275	HCT-15	IA	FALSE	TRUE	TRUE	TRUE
ASLGSLEGEAEAETSSPK	K	K	FALSE	FALSE	G	18	1	18	2	4	0	NA	Q09666	Q09666	2A		sp|Q09666-1|ENSG00000124942.13|AHNAK|ENST00000378024.8|112027-HCT-15_RARE_RNA-A5761T-and-112027-HCT-15_RARE_EXOME-A5761T|5761t|	AHNAK_p.A5761T	5761	HCT-15	IA	TRUE	FALSE	TRUE	TRUE
ASPLLAIGQTLAR	R	R	FALSE	FALSE	Q	13	1	13	2	1	0	NA	Q9NSI2	Q9NSI2	2A		sp|Q9NSI2-1|ENSG00000160256.12|FAM207A|ENST00000291634.10|190628-HCT-15_SNP_RNA-V212L-and-190628-HCT-15_SNP_EXOME-V212L|212l|	FAM207A_p.V212L	212	HCT-15	IA	FALSE	TRUE	TRUE	TRUE
ASSGGAGAAAAAAAANLNAVR	M	R	FALSE	FALSE	E	21	2	22	2	1	0	N-term(42.0106)	Q08AG7	Q08AG7	2A		sp|Q08AG7|ENSG00000204899.5|MZT1|ENST00000377818.3|129937-HCT-15_SNP_RNA-S5G-and-129937-HCT-15_SNP_EXOME-S5G|5g|	MZT1_p.S5G	5	HCT-15	IA	FALSE	TRUE	TRUE	TRUE
ASSSILINESEPITNIQIR	K	R	FALSE	FALSE	L	19	1	19	2	3	0	NA	Q9UNZ2	Q9UNZ2	2A		sp|Q9UNZ2-1|ENSG00000088833.17|NSFL1C|ENST00000216879.8|187508-HCT-15_SNP_RNA-D290N-and-187508-HCT-15_SNP_EXOME-D290N,187508-HCT-15_RARE_RNA-T295I-and-187508-HCT-15_RARE_EXOME-T295I|290n295i|	NSFL1C_p.D290N,T295I	290295	HCT-15	IA	TRUE	TRUE	TRUE	TRUE
AVEVATVVIQPTVLR	K	R	FALSE	FALSE	A	15	22	36	2	3	0	NA	Q9P2B2	Q9P2B2	2A		sp|Q9P2B2|ENSG00000134247.9|PTGFRN|ENST00000393203.2|5014-HCT-15_SNP_EXOME-S277T|277t|	PTGFRN_p.S277T	277	HCT-15	IA	FALSE	TRUE	FALSE	TRUE
AVGRLEAVSHTSDMHSGYADSPSK	R	K	FALSE	FALSE	A	24	1	24	4, 5	4	0	14M(15.9949)	Q01518	Q01518	2A		sp|Q01518-1|ENSG00000131236.16|CAP1|ENST00000372797.7|2315-HCT-15_RARE_RNA-R29S-and-2315-HCT-15_RARE_EXOME-R29S|29s|	CAP1_p.R29S	29	HCT-15	IA	TRUE	FALSE	TRUE	TRUE
AVLPLLDTQQPCYLLYR	R	R	FALSE	FALSE	L	17	10	26	2	2	0	12C(57.0215)	Q6IBS0	Q6IBS0	2A	67	sp|Q6IBS0|ENSG00000247596.8|TWF2|ENST00000305533.9|41283-HCT-15_RARE_RNA-A63T-and-41283-HCT-15_RARE_EXOME-A63T|63t|	TWF2_p.A63T	63	HCT-15	IA	TRUE	FALSE	TRUE	TRUE
AVTFSPELGPVPHEGLGEYNR	K	R	FALSE	FALSE	A	21	1	21	3	1	0	NA	Q9P1Y5	Q9P1Y5	2A		sp|Q9P1Y5-1|ENSG00000076826.9|CAMSAP3|ENST00000160298.8|173089-HCT-15_SNP_RNA-D687E-and-173089-HCT-15_SNP_EXOME-D687E|687e|	CAMSAP3_p.D687E	687	HCT-15	IA	FALSE	TRUE	TRUE	TRUE
CPEALFQPCFLGMESCDIHETTFNSIMK	R	K	FALSE	FALSE	S	28	1	28	3	1	0	13M(15.9949), 1C(57.0215), 9C(57.0215)	A5A3E0	A5A3E0	2A	957965972	sp|A5A3E0|ENSG00000196604.12|POTEF|ENST00000409914.6|29568-HCT-15_RARE_EXOME-G973D|973d|;sp|Q6S8J3-1|ENSG00000188219.14|POTEE|ENST00000356920.9|22005-HCT-15_RARE_EXOME-G973D|973d|	POTEF_p.G973D;POTEE_p.G973D	973	HCT-15	IA	TRUE	FALSE	FALSE	TRUE
DAMWIGFLTR	K	R	FALSE	FALSE	T	10	1	10	2	1	0	NA	Q13510	Q13510	2A		sp|Q13510-1|ENSG00000104763.18|ASAH1|ENST00000637790.1|85579-HCT-15_SNP_RNA-V246A-and-85579-HCT-15_SNP_EXOME-V246A|246a|	ASAH1_p.V246A	246	HCT-15	IA	FALSE	TRUE	TRUE	TRUE
DATGLECKPQPLHK	K	K	FALSE	FALSE	T	14	1	14	3	4	0	7C(57.0215)	Q9BXP5	Q9BXP5	2A	412	sp|Q9BXP5-1|ENSG00000087087.19|SRRT|ENST00000611405.4|74711-HCT-15_RARE_RNA-R415Q-and-74711-HCT-15_RARE_EXOME-R415Q,74711-HCT-15_RARE_RNA-A408T-and-74711-HCT-15_RARE_EXOME-A408T|408t415q|	SRRT_p.R415Q,A408T	415408	HCT-15	IA	TRUE	FALSE	TRUE	TRUE
DCGEAAAQWITSFLK	R	K	FALSE	FALSE	S	15	12	26	2	2	0	2C(57.0215)	Q5VT66	Q5VT66	2A	161	sp|Q5VT66-1|ENSG00000186205.12|MARC1|ENST00000366910.9|8430-HCT-15_SNP_RNA-T165A-and-8430-HCT-15_SNP_EXOME-T165A|165a|	MARC1_p.T165A	165	HCT-15	IA	FALSE	TRUE	TRUE	TRUE
DDHDPVDKIALQK	F	K	FALSE	FALSE	Y	13	12	24	3	2	0	NA	P22626	P22626	2A		sp|P22626-1|ENSG00000122566.20|HNRNPA2B1|ENST00000354667.8|77381-HCT-15_RARE_EXOME-V170A|170a|	HNRNPA2B1_p.V170A	170	HCT-15	IA	TRUE	FALSE	FALSE	TRUE
DEPLHALYDNVEK	R	K	FALSE	FALSE	L	13	8	20	2, 3	6	0	NA	P08243	P08243	2A		sp|P08243-1|ENSG00000070669.16|ASNS|ENST00000175506.8|79376-HCT-15_SNP_RNA-V210E-and-79376-HCT-15_SNP_EXOME-V210E|210e|	ASNS_p.V210E	210	HCT-15	IA	FALSE	TRUE	TRUE	TRUE
DGEDQTQDTELVETMPAGDGTFQK	R	K	FALSE	FALSE	W	24	1	24	2	1	0	NA	P10321	P10321	2A		sp|P10321|ENSG00000204525.16|HLA-C|ENST00000376228.9|68111-HCT-15_SNP_RNA-R258M-and-68111-HCT-15_SNP_EXOME-R258M|258m|	HLA-C_p.R258M	258	HCT-15	IA	FALSE	TRUE	TRUE	TRUE
DLEDLFFK	K	K	FALSE	FALSE	Y	8	5	12	2	2	0	NA	Q13242	Q13242	2A		sp|Q13242|ENSG00000111786.8|SRSF9|ENST00000229390.7|126450-HCT-15_SNP_RNA-Y35F-and-126450-HCT-15_SNP_EXOME-Y35F|35f|	SRSF9_p.Y35F	35	HCT-15	IA	FALSE	TRUE	TRUE	TRUE
DLGDLIEATGFDR	K	R	FALSE	FALSE	L	13	8	20	2	1	0	NA	Q6NXR4	Q6NXR4	2A		sp|Q6NXR4|ENSG00000129696.12|C8orf41|ENST00000613904.1|86116-HCT-15_SNP_RNA-E63G-and-86116-HCT-15_SNP_EXOME-E63G|63g|	C8orf41_p.E63G	63	HCT-15	IA	FALSE	TRUE	TRUE	TRUE
DMAGAQAAAVALNEEFLK	R	K	FALSE	FALSE	N	18	9	26	2	10	0	2M(15.9949)	Q14126	Q14126	2A		sp|Q14126|ENSG00000046604.12|DSG2|ENST00000261590.12|169179-HCT-15_SNP_RNA-R773K-and-169179-HCT-15_SNP_EXOME-R773K|773k|	DSG2_p.R773K	773	HCT-15	IA	FALSE	TRUE	TRUE	TRUE
DMAGAQAAAVALNEEFLKNYFTDK	R	K	FALSE	FALSE	A	24	9	32	3	1	0	2M(15.9949)	Q14126	Q14126	2A		sp|Q14126|ENSG00000046604.12|DSG2|ENST00000261590.12|169179-HCT-15_SNP_RNA-R773K-and-169179-HCT-15_SNP_EXOME-R773K|773k|	DSG2_p.R773K	773	HCT-15	IA	FALSE	TRUE	TRUE	TRUE
DMELPIEK	K	K	FALSE	FALSE	E	8	1	8	2	3	0	2M(15.9949)	P27816	P27816	2A		sp|P27816-1|ENSG00000047849.21|MAP4|ENST00000360240.10|40535-HCT-15_SNP_RNA-T310I-and-40535-HCT-15_SNP_EXOME-T310I|310i|	MAP4_p.T310I	310	HCT-15	IA	FALSE	TRUE	TRUE	TRUE
DNAGDWADFWR	R	R	FALSE	FALSE	M	11	1	11	2	3	0	NA	Q9UDY2	Q9UDY2	2A		sp|Q9UDY2-1|ENSG00000119139.18|TJP2|ENST00000377245.8|90437-HCT-15_RARE_RNA-R682W-and-90437-HCT-15_RARE_EXOME-R682W|682w|	TJP2_p.R682W	682	HCT-15	IA	TRUE	FALSE	TRUE	TRUE
DREAAEGLGSHER	K	R	FALSE	FALSE	A	13	3	15	3	3	0	NA	P17655	P17655	2A		sp|P17655-1|ENSG00000162909.17|CAPN2|ENST00000295006.5|8501-HCT-15_SNP_RNA-D22E-and-8501-HCT-15_SNP_EXOME-D22E|22e|	CAPN2_p.D22E	22	HCT-15	IA	FALSE	TRUE	TRUE	TRUE
DVGEWQHEEFYR	K	R	FALSE	FALSE	Y	12	17	28	2, 3	5	0	NA	Q12931	Q12931	2A		sp|Q12931-1|ENSG00000126602.10|TRAP1|ENST00000246957.9|151786-HCT-15_SNP_RNA-R307G-and-151786-HCT-15_SNP_EXOME-R307G|307g|	TRAP1_p.R307G	307	HCT-15	IA	FALSE	TRUE	TRUE	TRUE
EAAGEGPALYEDPPDHK	K	K	FALSE	FALSE	T	17	7	23	3	1	0	NA	P27695	P27695	2A		sp|P27695|ENSG00000100823.11|APEX1|ENST00000555414.5|130585-HCT-15_SNP_RNA-Q51H-and-130585-HCT-15_SNP_EXOME-Q51H|51h|	APEX1_p.Q51H	51	HCT-15	IA	FALSE	TRUE	TRUE	TRUE
EAGFPPGVVNIITGYGPTAGAAIAQHMDVDKVAFTGSTEVGHLIQK	K	K	FALSE	FALSE	A	46	20	65	5	1	0	NA	P30837	P30837	2A		sp|P30837|ENSG00000137124.7|ALDH1B1|ENST00000377698.3|90100-HCT-15_SNP_RNA-V253M-and-90100-HCT-15_SNP_EXOME-V253M|253m|	ALDH1B1_p.V253M	253	HCT-15	IA	FALSE	TRUE	TRUE	TRUE
EALDVLDAVLK	R	K	FALSE	FALSE	A	11	6	16	2	2	0	NA	Q92552	Q92552	2A		sp|Q92552-1|ENSG00000113048.16|MRPS27|ENST00000261413.9|59502-HCT-15_SNP_RNA-G284D-and-59502-HCT-15_SNP_EXOME-G284D|284d|	MRPS27_p.G284D	284	HCT-15	IA	FALSE	TRUE	TRUE	TRUE
EALPMDTEVYESPYTDPEEIRPK	R	K	FALSE	FALSE	E	23	7	29	3	1	0	NA	P43405	P43405	2A		sp|P43405-1|ENSG00000165025.14|SYK|ENST00000375754.8|90837-HCT-15_RARE_RNA-A353T-and-90837-HCT-15_RARE_EXOME-A353T|353t|	SYK_p.A353T	353	HCT-15	IA	TRUE	FALSE	TRUE	TRUE
EAPAGPLEEDDLEPLTLAPTPAPRPPQDLIGLR	K	R	FALSE	FALSE	L	33	9	41	3	3	0	NA	Q92797	Q92797	2A		sp|Q92797-1|ENSG00000125755.18|SYMPK|ENST00000245934.11|183215-HCT-15_RARE_RNA-A1129T-and-183215-HCT-15_RARE_EXOME-A1129T|1129t|	SYMPK_p.A1129T	1129	HCT-15	IA	TRUE	FALSE	TRUE	TRUE
EDQTLALLSQFK	R	K	FALSE	FALSE	S	12	1	12	2	4	0	NA	Q6UX04	Q6UX04	2A		sp|Q6UX04-1|ENSG00000153015.15|CWC27|ENST00000381070.7|54388-HCT-15_RARE_RNA-N390S-and-54388-HCT-15_RARE_EXOME-N390S|390s|	CWC27_p.N390S	390	HCT-15	IA	TRUE	FALSE	TRUE	TRUE
EFAGSLGIPFLETSAK	K	K	FALSE	FALSE	N	16	12	27	2	10	0	NA	Q9H0U4	Q9H0U4	2A		sp|Q9H0U4|ENSG00000174903.15|RAB1B|ENST00000311481.10|106330-HCT-15_RARE_RNA-D141G-and-106330-HCT-15_RARE_EXOME-D141G|141g|	RAB1B_p.D141G	141	HCT-15	IA	TRUE	FALSE	TRUE	TRUE
EFSPFGTITSANVMMEGGR	K	R	FALSE	FALSE	S	19	1	19	2	11	0	14M(15.9949), 15M(15.9949)	Q9H361	Q9H361	2A		sp|Q9H361|ENSG00000151846.8|PABPC3|ENST00000281589.4|127260-HCT-15_RARE_RNA-K324N,127260-HCT-15_RARE_RNA-A313E|313e324n|;sp|P11940-1|ENSG00000070756.15|PABPC1|ENST00000318607.9|87770-HCT-15_RARE_EXOME-K324N|324n|	PABPC3_p.K324N,A313E;PABPC1_p.K324N	324,313;324	HCT-15	IA	TRUE	FALSE	TRUE	TRUE
EIESSPQYCLR	R	R	FALSE	FALSE	L	11	1	11	2	1	0	9C(57.0215)	Q8WWM7	Q8WWM7	2A	310	sp|Q8WWM7-1|ENSG00000168488.18|ATXN2L|ENST00000336783.8|147684-HCT-15_RARE_RNA-R310C-and-147684-HCT-15_RARE_EXOME-R310C|310c|	ATXN2L_p.R310C	310	HCT-15	IA	TRUE	FALSE	TRUE	TRUE
EKDLEDLFFK	R	K	FALSE	FALSE	Y	10	3	12	2	1	0	NA	Q13242	Q13242	2A		sp|Q13242|ENSG00000111786.8|SRSF9|ENST00000229390.7|126450-HCT-15_SNP_RNA-Y35F-and-126450-HCT-15_SNP_EXOME-Y35F|35f|	SRSF9_p.Y35F	35	HCT-15	IA	FALSE	TRUE	TRUE	TRUE
EKLCFVALDFEQEMAMAASSSSLEK	K	K	FALSE	FALSE	S	25	1	25	2	1	0	14M(15.9949), 16M(15.9949)	P0CG38	P0CG38	2A	917	sp|P0CG38|ENSG00000196834.11|POTEI|ENST00000451531.6|29623-HCT-15_SNP_EXOME-Y918F|918f|	POTEI_p.Y918F	918	HCT-15	IA	FALSE	TRUE	FALSE	TRUE
EKLCFVALDFEQEMAMVASSSSLEK	K	K	FALSE	FALSE	S	25	1	25	2	2	0	4C(57.0215)	P0CG38	P0CG38	2A	917	sp|P0CG38|ENSG00000196834.11|POTEI|ENST00000451531.6|29623-HCT-15_SNP_EXOME-A930V,29623-HCT-15_SNP_EXOME-Y918F|918f930v|;sp|P0CG39|ENSG00000222038.3|POTEJ|ENST00000409602.1|21958-HCT-15_SNP_EXOME-Y881F|881f|	POTEI_p.A930V,Y918F;POTEJ_p.Y881F	930,918;881	HCT-15	IA	FALSE	TRUE	FALSE	TRUE
ELDECFAQANDQMETLDSLIR	R	R	FALSE	FALSE	E	21	1	21	2	1	0	5C(57.0215)	P15924	P15924	2A	110	sp|P15924-1|ENSG00000096696.13|DSP|ENST00000379802.7|62914-HCT-15_RARE_RNA-I120T-and-62914-HCT-15_RARE_EXOME-I120T|120t|	DSP_p.I120T	120	HCT-15	IA	TRUE	FALSE	TRUE	TRUE
ELSGLPSGPSAGSGPPPPPPGPPPPPVSTSSGSDESASR	K	R	FALSE	FALSE	S	39	1	39	3	1	0	NA	Q01518	Q01518	2A		sp|Q01518-1|ENSG00000131236.16|CAP1|ENST00000372797.7|2315-HCT-15_RARE_RNA-C229G-and-2315-HCT-15_RARE_EXOME-C229G,2315-HCT-15_RARE_RNA-C236G-and-2315-HCT-15_RARE_EXOME-C236G,2315-HCT-15_RARE_EXOME-I245S,2315-HCT-15_RARE_EXOME-C247G,2315-HCT-15_RARE_EXOME-Y249D|229g236g245s247g249d|	CAP1_p.C229G,C236G,I245S,C247G,Y249D	229236245247249	HCT-15	IA	TRUE	FALSE	TRUE	TRUE
EPWLLPSQHNDIIQDALGQR	R	R	FALSE	FALSE	Y	20	13	32	3	2	0	NA	Q14697	Q14697	2A		sp|Q14697-1|ENSG00000089597.16|GANAB|ENST00000356638.7|112080-HCT-15_SNP_RNA-R698Q-and-112080-HCT-15_SNP_EXOME-R698Q|698q|	GANAB_p.R698Q	698	HCT-15	IA	FALSE	TRUE	TRUE	TRUE
EPWVEQEGPEYWDRETQK	R	K	FALSE	FALSE	Y	18	1	18	3	1	0	NA	P10321	P10321	2A		sp|P10321|ENSG00000204525.16|HLA-C|ENST00000376228.9|68111-HCT-15_SNP_RNA-A73E-and-68111-HCT-15_SNP_EXOME-A73E|73e|	HLA-C_p.A73E	73	HCT-15	IA	FALSE	TRUE	TRUE	TRUE
EQDLQLEELRQPVSTLK	R	K	FALSE	FALSE	C	17	3	19	3	1	0	NA	O60763	O60763	2A		sp|O60763-1|ENSG00000138768.14|USO1|ENST00000514213.6|47074-HCT-15_RARE_RNA-Q672P-and-47074-HCT-15_RARE_EXOME-Q672P|672p|	USO1_p.Q672P	672	HCT-15	IA	TRUE	FALSE	TRUE	TRUE
EQLEAAKPEPIIEEVDLANLAPR	K	R	FALSE	FALSE	K	23	3	25	3	1	0	NA	Q8WUD4	Q8WUD4	2A		sp|Q8WUD4|ENSG00000160799.11|CCDC12|ENST00000425441.5|40450-HCT-15_SNP_RNA-V98I-and-40450-HCT-15_SNP_EXOME-V98I|98i|	CCDC12_p.V98I	98	HCT-15	IA	FALSE	TRUE	TRUE	TRUE
EQLQQEQALLEEIER	R	R	FALSE	FALSE	H	15	1	15	2	5	0	NA	Q15149	Q15149	2A		sp|Q15149-1|ENSG00000178209.14|PLEC|ENST00000322810.8|89058-HCT-15_SNP_RNA-R1386Q-and-89058-HCT-15_SNP_EXOME-R1386Q|1386q|	PLEC_p.R1386Q	1386	HCT-15	IA	FALSE	TRUE	TRUE	TRUE
ESFADILPEAAALVKDPSVSK	R	K	FALSE	FALSE	S	21	1	21	3	1	0	NA	Q5VT52	Q5VT52	2A		sp|Q5VT52-1|ENSG00000163125.15|RPRD2|ENST00000369068.4|5515-HCT-15_SNP_RNA-V103I-and-5515-HCT-15_SNP_EXOME-V103I|103i|	RPRD2_p.V103I	103	HCT-15	IA	FALSE	TRUE	TRUE	TRUE
ETFLDPFILR	K	R	FALSE	FALSE	D	10	1	10	2	1	0	NA	P23470	P23470	2A		sp|P23470-1|ENSG00000144724.19|PTPRG|ENST00000474889.5|35379-HCT-15_SNP_RNA-V237I-and-35379-HCT-15_SNP_EXOME-V237I|237i|	PTPRG_p.V237I	237	HCT-15	IA	FALSE	TRUE	TRUE	TRUE
FAEAFEDIPR	K	R	FALSE	FALSE	A	10	22	31	2	6	0	NA	P50990	P50990	2A		sp|P50990-1|ENSG00000156261.12|CCT8|ENST00000286788.8|191141-HCT-15_RARE_RNA-A447D-and-191141-HCT-15_RARE_EXOME-A447D|447d|	CCT8_p.A447D	447	HCT-15	IA	TRUE	FALSE	TRUE	TRUE
FAGGDYTTTIESFISASGR	K	R	FALSE	FALSE	A	19	1	19	2	1	0	NA	P07814	P07814	2A		sp|P07814|ENSG00000136628.17|EPRS|ENST00000366923.7|17120-HCT-15_RARE_RNA-A1227S-and-17120-HCT-15_RARE_EXOME-A1227S|1227s|	EPRS_p.A1227S	1227	HCT-15	IA	TRUE	FALSE	TRUE	TRUE
FGGGNPELLTHMVSK	R	K	FALSE	FALSE	G	15	8	22	2, 3	5	0	12M(15.9949)	P40939	P40939	2A		sp|P40939-1|ENSG00000084754.11|HADHA|ENST00000380649.7|26387-HCT-15_RARE_RNA-Q621H-and-26387-HCT-15_RARE_EXOME-Q621H|621h|	HADHA_p.Q621H	621	HCT-15	IA	TRUE	FALSE	TRUE	TRUE
FGYYGDALR	R	R	FALSE	FALSE	Q	9	1	9	2	1	0	NA	P07942	P07942	2A		sp|P07942|ENSG00000091136.13|LAMB1|ENST00000222399.10|80038-HCT-15_SNP_RNA-Q1022R-and-80038-HCT-15_SNP_EXOME-Q1022R|1022r|	LAMB1_p.Q1022R	1022	HCT-15	IA	FALSE	TRUE	TRUE	TRUE
FIIHVPPGEFNEVFNDVR	K	R	FALSE	FALSE	L	18	7	24	3	1	0	NA	P47755	P47755	2A		sp|P47755-1|ENSG00000198898.13|CAPZA2|ENST00000361183.7|75174-HCT-15_RARE_RNA-A24V-and-75174-HCT-15_RARE_EXOME-A24V|24v|	CAPZA2_p.A24V	24	HCT-15	IA	TRUE	FALSE	TRUE	TRUE
FIQENVFVAANHNASPLSIK	R	K	FALSE	FALSE	E	20	6	25	3	2	0	NA	P11172	P11172	2A		sp|P11172-1|ENSG00000114491.13|UMPS|ENST00000232607.6|36507-HCT-15_SNP_RNA-G213A-and-36507-HCT-15_SNP_EXOME-G213A|213a|	UMPS_p.G213A	213	HCT-15	IA	FALSE	TRUE	TRUE	TRUE
FKFTVGDHSR	K	R	FALSE	FALSE	F	10	3	12	3	1	0	NA	O75083	O75083	2A		sp|O75083-1|ENSG00000071127.16|WDR1|ENST00000499869.6|49631-HCT-15_SNP_EXOME-I185V|185v|	WDR1_p.I185V	185	HCT-15	IA	FALSE	TRUE	FALSE	TRUE
FLEGTNCIAGVFVDATK	K	K	FALSE	FALSE	E	17	1	17	2	1	0	7C(57.0215)	Q15149	Q15149	2A	4071	sp|Q15149-1|ENSG00000178209.14|PLEC|ENST00000322810.8|89058-HCT-15_RARE_RNA-S4070N-and-89058-HCT-15_RARE_EXOME-S4070N|4070n|	PLEC_p.S4070N	4070	HCT-15	IA	TRUE	FALSE	TRUE	TRUE
FLSSSPHLPPSSYFNANGR	K	R	FALSE	FALSE	A	19	13	31	3	1	0	NA	O14773	O14773	2A		sp|O14773-1|ENSG00000166340.16|TPP1|ENST00000299427.11|109975-HCT-15_RARE_RNA-S445N-and-109975-HCT-15_RARE_EXOME-S445N|445n|	TPP1_p.S445N	445	HCT-15	IA	TRUE	FALSE	TRUE	TRUE
FNHNLLPSETAHKPDLFSK	K	K	FALSE	FALSE	T	19	1	19	4	2	0	NA	Q07157	Q07157	2A		sp|Q07157-1|ENSG00000104067.16|TJP1|ENST00000346128.10|142049-HCT-15_RARE_RNA-S1564F-and-142049-HCT-15_RARE_EXOME-S1564F|1564f|	TJP1_p.S1564F	1564	HCT-15	IA	TRUE	FALSE	TRUE	TRUE
FNLSQESSYIATQYSLRPR	K	R	FALSE	FALSE	R	19	8	26	3	3	0	NA	Q14739	Q14739	2A		sp|Q14739|ENSG00000143815.14|LBR|ENST00000272163.8|17298-HCT-15_SNP_RNA-S154N-and-17298-HCT-15_SNP_EXOME-S154N|154n|	LBR_p.S154N	154	HCT-15	IA	FALSE	TRUE	TRUE	TRUE
FSVPVQHFCGGNPSTPIQVR	R	R	FALSE	FALSE	C	20	12	31	2, 3	3	0	9C(57.0215)	Q99829	Q99829	2A	200	sp|Q99829|ENSG00000214078.12|CPNE1|ENST00000352393.8|188439-HCT-15_SNP_EXOME-Q211R|211r|	CPNE1_p.Q211R	211	HCT-15	IA	FALSE	TRUE	FALSE	TRUE
FTVGDHSR	K	R	FALSE	FALSE	F	8	5	12	2	4	0	NA	O75083	O75083	2A		sp|O75083-1|ENSG00000071127.16|WDR1|ENST00000499869.6|49631-HCT-15_SNP_EXOME-I185V|185v|	WDR1_p.I185V	185	HCT-15	IA	FALSE	TRUE	FALSE	TRUE
FVTDQGACAGSPSLVAATR	R	R	FALSE	FALSE	R	19	8	26	2	5	0	8C(57.0215)	Q96GM1	Q96GM1	2A	191	sp|Q96GM1-1|ENSG00000105520.10|PLPPR2|ENST00000251473.9|173637-HCT-15_RARE_RNA-A201T-and-173637-HCT-15_RARE_EXOME-A201T|201t|	PLPPR2_p.A201T	201	HCT-15	IA	TRUE	FALSE	TRUE	TRUE
FWRPEEPIEVIRPDIAALVR	K	R	FALSE	FALSE	Q	20	14	33	4	4	0	NA	Q8TED1	Q8TED1	2A		sp|Q8TED1|ENSG00000164294.13|GPX8|ENST00000503787.5|54220-HCT-15_SNP_RNA-K182R-and-54220-HCT-15_SNP_EXOME-K182R|182r|	GPX8_p.K182R	182	HCT-15	IA	FALSE	TRUE	TRUE	TRUE
GDYIGSTYFER	R	R	FALSE	FALSE	C	11	6	16	2	5	0	NA	P61081	P61081	2A		sp|P61081|ENSG00000130725.7|UBE2M|ENST00000253023.7|185046-HCT-15_RARE_RNA-G171D-and-185046-HCT-15_RARE_EXOME-G171D|171d|	UBE2M_p.G171D	171	HCT-15	IA	TRUE	FALSE	TRUE	TRUE
GFGFVTFDDHDPVDKIALQK	R	K	FALSE	FALSE	Y	20	5	24	3, 4	17	0	NA	P22626	P22626	2A		sp|P22626-1|ENSG00000122566.20|HNRNPA2B1|ENST00000354667.8|77381-HCT-15_RARE_EXOME-V170A|170a|	HNRNPA2B1_p.V170A	170	HCT-15	IA	TRUE	FALSE	FALSE	TRUE
GFGTDEQAIVDVVANCSNDQR	K	R	FALSE	FALSE	Q	21	7	27	2	2	0	16C(57.0215)	P20073	P20073	2A	215	sp|P20073-1|ENSG00000138279.15|ANXA7|ENST00000372919.8|101160-HCT-15_RARE_RNA-R215C-and-101160-HCT-15_RARE_EXOME-R215C|215c|	ANXA7_p.R215C	215	HCT-15	IA	TRUE	FALSE	TRUE	TRUE
GFTTAGVLAAHK	K	K	FALSE	FALSE	L	12	18	29	2	3	0	NA	P32322	P32322	2A		sp|P32322-1|ENSG00000183010.16|PYCR1|ENST00000619204.4|168184-HCT-15_RARE_EXOME-A21T|21t|	PYCR1_p.A21T	21	HCT-15	IA	TRUE	FALSE	FALSE	TRUE
GIIDLIEER	K	R	FALSE	FALSE	A	9	22	30	2	2	0	NA	Q96RP9	Q96RP9	2A		sp|Q96RP9-1|ENSG00000168827.14|GFM1|ENST00000486715.5|37581-HCT-15_SNP_RNA-V215I-and-37581-HCT-15_SNP_EXOME-V215I|215i|	GFM1_p.V215I	215	HCT-15	IA	FALSE	TRUE	TRUE	TRUE
GISEDSHLESLQDVGQSAAPTFMISPETITGTGK	K	K	FALSE	FALSE	K	34	12	45	3	5	0	23M(15.9949)	P27816	P27816	2A		sp|P27816-1|ENSG00000047849.21|MAP4|ENST00000360240.10|40535-HCT-15_SNP_EXOME-V628I|628i|	MAP4_p.V628I	628	HCT-15	IA	FALSE	TRUE	FALSE	TRUE
GISEDSHLESLQDVGQSAAPTFMISPETITGTGKK	K	K	FALSE	FALSE	C	35	12	46	4	4	0	23M(15.9949)	P27816	P27816	2A		sp|P27816-1|ENSG00000047849.21|MAP4|ENST00000360240.10|40535-HCT-15_SNP_EXOME-V628I|628i|	MAP4_p.V628I	628	HCT-15	IA	FALSE	TRUE	FALSE	TRUE
GLVEPVNMVDNGDGTHTVTYTPSQEGPYMVSVK	R	K	FALSE	FALSE	Y	33	1	33	3	6	0	8M(15.9949)	O75369	O75369	2A		sp|O75369-1|ENSG00000136068.14|FLNB|ENST00000295956.8|35308-HCT-15_SNP_RNA-V1471M-and-35308-HCT-15_SNP_EXOME-V1471M|1471m|	FLNB_p.V1471M	1471	HCT-15	IA	FALSE	TRUE	TRUE	TRUE
GPKVDIDVPDVGVQGPDWHLK	R	K	FALSE	FALSE	M	21	1	21	4	2	0	NA	Q09666	Q09666	2A		sp|Q09666-1|ENSG00000124942.13|AHNAK|ENST00000378024.8|112027-HCT-15_RARE_RNA-Q3003K-and-112027-HCT-15_RARE_EXOME-Q3003K|3003k|	AHNAK_p.Q3003K	3003	HCT-15	IA	TRUE	FALSE	TRUE	TRUE
GQEEMLLLFHHLTPR	R	R	FALSE	FALSE	W	15	10	24	3	2	0	NA	Q8TF72	Q8TF72	2A		sp|Q8TF72-1|ENSG00000138771.15|SHROOM3|ENST00000296043.6|47112-HCT-15_SNP_RNA-P1290L-and-47112-HCT-15_SNP_EXOME-P1290L|1290l|	SHROOM3_p.P1290L	1290	HCT-15	IA	FALSE	TRUE	TRUE	TRUE
GTEGKEPEEGVTVESQPQVK	K	K	FALSE	FALSE	V	20	9	28	3	1	0	NA	O15446	O15446	2A		sp|O15446-1|ENSG00000117877.10|CD3EAP|ENST00000309424.7|176796-HCT-15_RARE_RNA-M299K-and-176796-HCT-15_RARE_EXOME-M299K|299k|	CD3EAP_p.M299K	299	HCT-15	IA	TRUE	FALSE	TRUE	TRUE
GVVPLAGTNGETTIQGLDGLSER	K	R	FALSE	FALSE	C	23	6	28	2	10	0	NA	P04075	P04075	2A		sp|P04075-1|ENSG00000149925.18|ALDOA|ENST00000569545.5|147948-HCT-15_RARE_EXOME-T125I|125i|	ALDOA_p.T125I	125	HCT-15	IA	TRUE	FALSE	FALSE	TRUE
HASSGSFLSSANEHLKEDLNLR	R	R	FALSE	FALSE	L	22	7	28	4	3	0	NA	O76003	O76003	2A		sp|O76003|ENSG00000108010.11|GLRX3|ENST00000331244.9|99420-HCT-15_SNP_RNA-P123S-and-99420-HCT-15_SNP_EXOME-P123S|123s|	GLRX3_p.P123S	123	HCT-15	IA	FALSE	TRUE	TRUE	TRUE
HFTAQGLPDLNHSQVYAVK	K	K	FALSE	FALSE	T	19	1	19	3	2	0	NA	Q92900	Q92900	2A		sp|Q92900-1|ENSG00000005007.12|UPF1|ENST00000599848.5|174650-HCT-15_RARE_RNA-R473H-and-174650-HCT-15_RARE_EXOME-R473H|473h|	UPF1_p.R473H	473	HCT-15	IA	TRUE	FALSE	TRUE	TRUE
HGYFDEEMNR	R	R	FALSE	FALSE	V	10	1	10	2	2	0	NA	Q15149	Q15149	2A		sp|Q15149-1|ENSG00000178209.14|PLEC|ENST00000322810.8|89058-HCT-15_SNP_RNA-R2969H-and-89058-HCT-15_SNP_EXOME-R2969H|2969h|	PLEC_p.R2969H	2969	HCT-15	IA	FALSE	TRUE	TRUE	TRUE
HTLSFVDVGTGK	K	K	FALSE	FALSE	V	12	1	12	2	4	0	NA	P31040	P31040	2A		sp|P31040-1|ENSG00000073578.16|SDHA|ENST00000264932.10|53319-HCT-15_RARE_RNA-Y629F-and-53319-HCT-15_RARE_EXOME-Y629F|629f|	SDHA_p.Y629F	629	HCT-15	IA	TRUE	FALSE	TRUE	TRUE
IATSPASQLSPTELTEMR	F	R	FALSE	FALSE	N	18	1	18	2	1	0	NA	Q9NYK5	Q9NYK5	2A		sp|Q9NYK5-1|ENSG00000154719.13|MRPL39|ENST00000352957.8|191066-HCT-15_SNP_RNA-S31P-and-191066-HCT-15_SNP_EXOME-S31P|31p|	MRPL39_p.S31P	31	HCT-15	IA	FALSE	TRUE	TRUE	TRUE
ICIDSLSAQLSQLQK	R	K	FALSE	FALSE	Q	15	1	15	2	7	0	2C(57.0215)	P02545	P02545	2A	298	sp|P02545-1|ENSG00000160789.19|LMNA|ENST00000368300.8|6152-HCT-15_RARE_RNA-R298C-and-6152-HCT-15_RARE_EXOME-R298C|298c|	LMNA_p.R298C	298	HCT-15	IA	TRUE	FALSE	TRUE	TRUE
IEPDRAQVDEVLQLR	R	R	FALSE	FALSE	E	15	1	15	3	2	0	NA	O60437	O60437	2A		sp|O60437|ENSG00000118898.15|PPL|ENST00000345988.6|152024-HCT-15_SNP_RNA-A1007V-and-152024-HCT-15_SNP_EXOME-A1007V|1007v|	PPL_p.A1007V	1007	HCT-15	IA	FALSE	TRUE	TRUE	TRUE
IFEEDPAVGAIVLTGGDK	K	K	FALSE	FALSE	A	18	1	18	2	6	0	NA	P30084	P30084	2A		sp|P30084|ENSG00000127884.4|ECHS1|ENST00000368547.3|102799-HCT-15_SNP_RNA-T75I-and-102799-HCT-15_SNP_EXOME-T75I|75i|	ECHS1_p.T75I	75	HCT-15	IA	FALSE	TRUE	TRUE	TRUE
IFEEDPAVGAIVLTGGDKAFAAGADIK	K	K	FALSE	FALSE	E	27	1	27	3	4	0	NA	P30084	P30084	2A		sp|P30084|ENSG00000127884.4|ECHS1|ENST00000368547.3|102799-HCT-15_SNP_RNA-T75I-and-102799-HCT-15_SNP_EXOME-T75I|75i|	ECHS1_p.T75I	75	HCT-15	IA	FALSE	TRUE	TRUE	TRUE
IIGLDQVAGMSETALLGAFK	R	K	FALSE	FALSE	T	20	1	20	2	2	0	10M(15.9949)	P35579	P35579	2A		sp|P35579-1|ENSG00000100345.21|MYH9|ENST00000216181.10|195651-HCT-15_RARE_RNA-P633L-and-195651-HCT-15_RARE_EXOME-P633L|633l|	MYH9_p.P633L	633	HCT-15	IA	TRUE	FALSE	TRUE	TRUE
IQPEDMFVYDINEK	R	K	FALSE	FALSE	D	14	1	14	2	1	0	NA	Q96GX9	Q96GX9	2A		sp|Q96GX9-1|ENSG00000149089.12|APIP|ENST00000395787.3|111040-HCT-15_SNP_RNA-C76Y-and-111040-HCT-15_SNP_EXOME-C76Y|76y|	APIP_p.C76Y	76	HCT-15	IA	FALSE	TRUE	TRUE	TRUE
ISYGPDWKDFYVVEPLAFEGTPEQK	R	K	FALSE	FALSE	A	25	3	27	3	6	0	NA	P06865	P06865	2A		sp|P06865-1|ENSG00000213614.9|HEXA|ENST00000268097.9|144124-HCT-15_SNP_RNA-I436V-and-144124-HCT-15_SNP_EXOME-I436V|436v|	HEXA_p.I436V	436	HCT-15	IA	FALSE	TRUE	TRUE	TRUE
ITDAYLDQYLR	K	R	FALSE	FALSE	Y	11	27	37	2	3	0	NA	Q6P2Q9	Q6P2Q9	2A		sp|Q6P2Q9|ENSG00000174231.16|PRPF8|ENST00000572621.5|162017-HCT-15_RARE_RNA-W927R-and-162017-HCT-15_RARE_EXOME-W927R|927r|	PRPF8_p.W927R	927	HCT-15	IA	TRUE	FALSE	TRUE	TRUE
ITGEAFMQFASQELAEK	K	K	FALSE	FALSE	A	17	29	45	2	6	0	NA	P52597	P52597	2A		sp|P52597|ENSG00000169813.16|HNRNPF|ENST00000443950.6|100445-HCT-15_SNP_RNA-V157M-and-100445-HCT-15_SNP_EXOME-V157M|157m|	HNRNPF_p.V157M	157	HCT-15	IA	FALSE	TRUE	TRUE	TRUE
KAAVPAPEEEMDECEQALAAEPK	K	K	FALSE	FALSE	A	23	7	29	2, 3	13	0	11M(15.9949), 14C(57.0215)	P26641	P26641	2A	266	sp|P26641-1|ENSG00000254772.9|EEF1G|ENST00000329251.4|112031-HCT-15_RARE_RNA-A256V-and-112031-HCT-15_RARE_EXOME-A256V|256v|	EEF1G_p.A256V	256	HCT-15	IA	TRUE	FALSE	TRUE	TRUE
KAFSEYLGTDQSK	K	K	FALSE	FALSE	W	13	21	33	2	4	0	NA	P10768	P10768	2A		sp|P10768|ENSG00000139684.13|ESD|ENST00000378720.7|129610-HCT-15_SNP_RNA-G190E-and-129610-HCT-15_SNP_EXOME-G190E|190e|	ESD_p.G190E	190	HCT-15	IA	FALSE	TRUE	TRUE	TRUE
KAPPMPGPVPEAAQPFLFTPR	R	R	FALSE	FALSE	G	21	1	21	3	1	0	NA	Q7Z406	Q7Z406	2A		sp|Q7Z406-1|ENSG00000105357.16|MYH14|ENST00000376970.6|177517-HCT-15_RARE_RNA-R16M-and-177517-HCT-15_RARE_EXOME-R16M|16m|	MYH14_p.R16M	16	HCT-15	IA	TRUE	FALSE	TRUE	TRUE
KEFSPFGTITSANVMMEGGR	R	R	FALSE	FALSE	S	20	1	20	3	4	0	NA	Q9H361	Q9H361	2A		sp|Q9H361|ENSG00000151846.8|PABPC3|ENST00000281589.4|127260-HCT-15_RARE_RNA-K324N,127260-HCT-15_RARE_RNA-A313E|313e324n|;sp|P11940-1|ENSG00000070756.15|PABPC1|ENST00000318607.9|87770-HCT-15_RARE_EXOME-K324N|324n|	PABPC3_p.K324N,A313E;PABPC1_p.K324N	324,313;324	HCT-15	IA	TRUE	FALSE	TRUE	TRUE
KFAEAFEDIPR	K	R	FALSE	FALSE	A	11	21	31	2, 3	4	0	NA	P50990	P50990	2A		sp|P50990-1|ENSG00000156261.12|CCT8|ENST00000286788.8|191141-HCT-15_RARE_RNA-A447D-and-191141-HCT-15_RARE_EXOME-A447D|447d|	CCT8_p.A447D	447	HCT-15	IA	TRUE	FALSE	TRUE	TRUE
KFDDAVVQSDMK	R	K	FALSE	FALSE	H	12	8	19	2, 3	20	0	11M(15.9949)	P11142	P11142	2A		sp|P11142-1|ENSG00000109971.13|HSPA8|ENST00000532636.5|115059-HCT-15_RARE_RNA-R77K-and-115059-HCT-15_RARE_EXOME-R77K|77k|	HSPA8_p.R77K	77	HCT-15	IA	TRUE	FALSE	TRUE	TRUE
KFDVNASAVQVLIEHIGNLDR	R	R	FALSE	FALSE	A	21	30	50	3	1	0	NA	Q00610	Q00610	2A		sp|Q00610-1|ENSG00000141367.11|CLTC|ENST00000269122.7|160025-HCT-15_RARE_RNA-T1079A-and-160025-HCT-15_RARE_EXOME-T1079A|1079a|	CLTC_p.T1079A	1079	HCT-15	IA	TRUE	FALSE	TRUE	TRUE
KIDAAQNWFADPNGGPEGEEQIR	K	R	FALSE	FALSE	G	23	8	30	3	3	0	NA	P18206	P18206	2A		sp|P18206-1|ENSG00000035403.17|VCL|ENST00000211998.9|97891-HCT-15_RARE_EXOME-L395F|395f|	VCL_p.L395F	395	HCT-15	IA	TRUE	FALSE	FALSE	TRUE
KLGGTTDDCELVEGLVLTQK	K	K	FALSE	FALSE	V	20	6	25	3	1	0	9C(57.0215)	P50991	P50991	2A	221	sp|P50991-1|ENSG00000115484.14|CCT4|ENST00000394440.7|27519-HCT-15_RARE_EXOME-I218T|218t|	CCT4_p.I218T	218	HCT-15	IA	TRUE	FALSE	FALSE	TRUE
KNDKEAAGEGPALYEDPPDHK	K	K	FALSE	FALSE	T	21	3	23	4	1	0	NA	P27695	P27695	2A		sp|P27695|ENSG00000100823.11|APEX1|ENST00000555414.5|130585-HCT-15_SNP_RNA-Q51H-and-130585-HCT-15_SNP_EXOME-Q51H|51h|	APEX1_p.Q51H	51	HCT-15	IA	FALSE	TRUE	TRUE	TRUE
KPFAGALDVSFNK	R	K	FALSE	FALSE	F	13	8	20	3	1	0	NA	Q99627	Q99627	2A		sp|Q99627-1|ENSG00000198612.10|COPS8|ENST00000354371.6|25230-HCT-15_RARE_RNA-V168F-and-25230-HCT-15_RARE_EXOME-V168F|168f|	COPS8_p.V168F	168	HCT-15	IA	TRUE	FALSE	TRUE	TRUE
KSQIFSIASDNQPTVTIK	K	K	FALSE	FALSE	V	18	10	27	3	4	0	NA	P11021	P11021	2A		sp|P11021|ENSG00000044574.7|HSPA5|ENST00000324460.6|95250-HCT-15_RARE_RNA-T453I-and-95250-HCT-15_RARE_EXOME-T453I|453i|	HSPA5_p.T453I	453	HCT-15	IA	TRUE	FALSE	TRUE	TRUE
KYTLPPGVDPAQVSSSLSPEGTLTVEAPMPK	R	K	FALSE	FALSE	L	31	7	37	3	18	0	29M(15.9949)	P04792	P04792	2A		sp|P04792|ENSG00000106211.8|HSPB1|ENST00000248553.6|73783-HCT-15_RARE_RNA-T151A-and-73783-HCT-15_RARE_EXOME-T151A|151a|	HSPB1_p.T151A	151	HCT-15	IA	TRUE	FALSE	TRUE	TRUE
LADDVDLEQVSNETHGHVGADLAALCSEAALQAIR	K	R	FALSE	FALSE	K	35	6	40	3, 4	4	0	26C(57.0215)	P55072	P55072	2A	415	sp|P55072|ENSG00000165280.15|VCP|ENST00000358901.10|93504-HCT-15_RARE_EXOME-A400S|400s|	VCP_p.A400S	400	HCT-15	IA	TRUE	FALSE	FALSE	TRUE
LADDVDLEQVSNETHGHVGADLAALCSEAALQAIRK	K	K	FALSE	FALSE	K	36	6	41	5	3	0	26C(57.0215)	P55072	P55072	2A	415	sp|P55072|ENSG00000165280.15|VCP|ENST00000358901.10|93504-HCT-15_RARE_EXOME-A400S|400s|	VCP_p.A400S	400	HCT-15	IA	TRUE	FALSE	FALSE	TRUE
LCFVALDFEQEMAIAASSSSLEK	K	K	FALSE	FALSE	S	23	1	23	2	2	0	2C(57.0215)	P0CG38	P0CG38	2A	917	sp|P0CG38|ENSG00000196834.11|POTEI|ENST00000451531.6|29623-HCT-15_SNP_EXOME-M929I,29623-HCT-15_SNP_EXOME-Y918F|918f929i|	POTEI_p.M929I,Y918F	929918	HCT-15	IA	FALSE	TRUE	FALSE	TRUE
LEAVSHTSDMHSGYADSPSK	R	K	FALSE	FALSE	A	20	1	20	3, 4	7	0	NA	Q01518	Q01518	2A		sp|Q01518-1|ENSG00000131236.16|CAP1|ENST00000372797.7|2315-HCT-15_RARE_RNA-R29S-and-2315-HCT-15_RARE_EXOME-R29S|29s|	CAP1_p.R29S	29	HCT-15	IA	TRUE	FALSE	TRUE	TRUE
LFDFQGLQHQVAHVSTQLEAAR	R	R	FALSE	FALSE	L	22	9	30	4	1	0	NA	P45954	P45954	2A		sp|P45954-1|ENSG00000196177.12|ACADSB|ENST00000358776.6|99302-HCT-15_RARE_RNA-A340S-and-99302-HCT-15_RARE_EXOME-A340S|340s|	ACADSB_p.A340S	340	HCT-15	IA	TRUE	FALSE	TRUE	TRUE
LFGTSPATEAAPPPPEPVPAAQGPATVQSVEDFVPDDRLDR	R	R	FALSE	FALSE	S	41	9	49	3	2	0	NA	Q3YEC7	Q3YEC7	2A		sp|Q3YEC7-1|ENSG00000196642.18|RABL6|ENST00000311502.11|92549-HCT-15_SNP_RNA-E382Q-and-92549-HCT-15_SNP_EXOME-E382Q|382q|	RABL6_p.E382Q	382	HCT-15	IA	FALSE	TRUE	TRUE	TRUE
LGGTTDDCELVEGLVLTQK	K	K	FALSE	FALSE	V	19	7	25	2	1	0	8C(57.0215)	P50991	P50991	2A	221	sp|P50991-1|ENSG00000115484.14|CCT4|ENST00000394440.7|27519-HCT-15_RARE_EXOME-I218T|218t|	CCT4_p.I218T	218	HCT-15	IA	TRUE	FALSE	FALSE	TRUE
LGITPEGQSYLDQFR	K	R	FALSE	FALSE	Q	15	7	21	2	1	0	NA	Q2M389	Q2M389	2A		sp|Q2M389-1|ENSG00000136051.14|WASHC4|ENST00000332180.9|119892-HCT-15_SNP_RNA-V901I-and-119892-HCT-15_SNP_EXOME-V901I|901i|	WASHC4_p.V901I	901	HCT-15	IA	FALSE	TRUE	TRUE	TRUE
LGPGGLDPVEVYESLHEELQK	R	K	FALSE	FALSE	C	21	13	33	2, 3	11	0	NA	Q16543	Q16543	2A		sp|Q16543|ENSG00000105401.8|CDC37|ENST00000222005.6|180096-HCT-15_RARE_EXOME-P302H|302h|	CDC37_p.P302H	302	HCT-15	IA	TRUE	FALSE	FALSE	TRUE
LIHVMLMDNSTPQSEGGTLK	R	K	FALSE	FALSE	A	20	8	27	3	2	0	NA	Q7LBC6	Q7LBC6	2A		sp|Q7LBC6-1|ENSG00000120733.13|KDM3B|ENST00000314358.9|56317-HCT-15_SNP_RNA-A256T-and-56317-HCT-15_SNP_EXOME-A256T|256t|	KDM3B_p.A256T	256	HCT-15	IA	FALSE	TRUE	TRUE	TRUE
LLDTVDDMLANDIVR	K	R	FALSE	FALSE	L	15	5	19	2	4	0	NA	Q9H4M9	Q9H4M9	2A		sp|Q9H4M9|ENSG00000110047.17|EHD1|ENST00000320631.7|112450-HCT-15_RARE_RNA-A391V-and-112450-HCT-15_RARE_EXOME-A391V|391v|	EHD1_p.A391V	391	HCT-15	IA	TRUE	FALSE	TRUE	TRUE
LLLPGELANHAVSEGTK	R	K	FALSE	FALSE	A	17	10	26	2, 3	19	0	NA	Q99880	Q99880	2A		sp|Q99880|ENSG00000185130.5|HIST1H2BL|ENST00000377401.3|67796-HCT-15_RARE_RNA-K109N-and-67796-HCT-15_RARE_EXOME-K109N|109n|	HIST1H2BL_p.K109N	109	HCT-15	IA	TRUE	FALSE	TRUE	TRUE
LLSDLLPPSTGTFQEAQSR	R	R	FALSE	FALSE	L	19	11	29	2	9	0	NA	Q9Y490	Q9Y490	2A		sp|Q9Y490|ENSG00000137076.20|TLN1|ENST00000314888.9|93585-HCT-15_SNP_EXOME-S1227L|1227l|	TLN1_p.S1227L	1227	HCT-15	IA	FALSE	TRUE	FALSE	TRUE
LLTQDEGPALVPGSR	R	R	FALSE	FALSE	L	15	7	21	2	1	0	NA	Q5T440	Q5T440	2A		sp|Q5T440|ENSG00000181873.12|IBA57|ENST00000366711.3|8718-HCT-15_SNP_RNA-G211S-and-8718-HCT-15_SNP_EXOME-G211S|211s|	IBA57_p.G211S	211	HCT-15	IA	FALSE	TRUE	TRUE	TRUE
LNATEEMLQQELLSR	K	R	FALSE	FALSE	T	15	5	19	2	3	0	NA	Q86W92	Q86W92	2A		sp|Q86W92-1|ENSG00000110841.13|PPFIBP1|ENST00000318304.12|116846-HCT-15_SNP_RNA-V148L-and-116846-HCT-15_SNP_EXOME-V148L|148l|	PPFIBP1_p.V148L	148	HCT-15	IA	FALSE	TRUE	TRUE	TRUE
LNLPINIIGLAPLCENIPSGK	K	K	FALSE	FALSE	A	21	21	41	2	3	0	14C(57.0215)	P28838	P28838	2A	335	sp|P28838-1|ENSG00000002549.12|LAP3|ENST00000226299.8|45960-HCT-15_RARE_RNA-M338I-and-45960-HCT-15_RARE_EXOME-M338I|338i|	LAP3_p.M338I	338	HCT-15	IA	TRUE	FALSE	TRUE	TRUE
LPGELANHAVSEGTK	L	K	FALSE	FALSE	A	15	12	26	3	1	0	NA	Q99880	Q99880	2A		sp|Q99880|ENSG00000185130.5|HIST1H2BL|ENST00000377401.3|67796-HCT-15_RARE_RNA-K109N-and-67796-HCT-15_RARE_EXOME-K109N|109n|	HIST1H2BL_p.K109N	109	HCT-15	IA	TRUE	FALSE	TRUE	TRUE
LQAAYAGDKANDIQKR	R	R	FALSE	FALSE	E	16	3	18	3	3	0	NA	Q01082	Q01082	2A		sp|Q01082-1|ENSG00000115306.15|SPTBN1|ENST00000356805.8|19558-HCT-15_RARE_RNA-D1880N-and-19558-HCT-15_RARE_EXOME-D1880N|1880n|	SPTBN1_p.D1880N	1880	HCT-15	IA	TRUE	FALSE	TRUE	TRUE
LQQEANLLQLK	K	K	FALSE	FALSE	S	11	1	11	2	5	0	NA	Q15149	Q15149	2A		sp|Q15149-1|ENSG00000178209.14|PLEC|ENST00000322810.8|89058-HCT-15_RARE_RNA-K2604N-and-89058-HCT-15_RARE_EXOME-K2604N|2604n|	PLEC_p.K2604N	2604	HCT-15	IA	TRUE	FALSE	TRUE	TRUE
LQQLPADFGHLVNLQHLDLLNNK	K	K	FALSE	FALSE	L	23	1	23	3, 4	4	0	NA	Q96AG4	Q96AG4	2A		sp|Q96AG4|ENSG00000108829.9|LRRC59|ENST00000225972.7|166134-HCT-15_RARE_RNA-R83H-and-166134-HCT-15_RARE_EXOME-R83H|83h|	LRRC59_p.R83H	83	HCT-15	IA	TRUE	FALSE	TRUE	TRUE
LSPYALAFMPPGYEEDMK	K	K	FALSE	FALSE	L	18	8	25	2	1	0	NA	Q9BXJ9	Q9BXJ9	2A		sp|Q9BXJ9-1|ENSG00000164134.12|NAA15|ENST00000296543.9|48202-HCT-15_RARE_RNA-F832S-and-48202-HCT-15_RARE_EXOME-F832S|832s|	NAA15_p.F832S	832	HCT-15	IA	TRUE	FALSE	TRUE	TRUE
LTQAQIFDYSEIPNFPR	K	R	FALSE	FALSE	S	17	20	36	2	2	0	NA	P00491	P00491	2A		sp|P00491|ENSG00000198805.11|PNP|ENST00000361505.9|130606-HCT-15_SNP_RNA-G51S-and-130606-HCT-15_SNP_EXOME-G51S|51s|	PNP_p.G51S	51	HCT-15	IA	FALSE	TRUE	TRUE	TRUE
LVDYLEWIR	R	R	FALSE	FALSE	K	9	1	9	2	1	0	NA	Q96BR5	Q96BR5	2A		sp|Q96BR5|ENSG00000162377.5|COA7|ENST00000371538.4|12322-HCT-15_RARE_RNA-G46W-and-12322-HCT-15_RARE_EXOME-G46W|46w|	COA7_p.G46W	46	HCT-15	IA	TRUE	FALSE	TRUE	TRUE
MEAVVNLYQEVMNHADPR	-	R	FALSE	FALSE	L	18	1	18	2	1	0	N-term(42.0106)	Q9BW60	Q9BW60	2A		sp|Q9BW60-1|ENSG00000066322.14|ELOVL1|ENST00000372458.7|11828-HCT-15_RARE_RNA-K13N-and-11828-HCT-15_RARE_EXOME-K13N|13n|	ELOVL1_p.K13N	13	HCT-15	IA	TRUE	FALSE	TRUE	TRUE
MHKEEHEVAVLGAPPSTILPR	-	R	FALSE	FALSE	S	21	1	21	4	1	0	N-term(42.0106)	P13164	P13164	2A		sp|P13164|ENSG00000185885.15|IFITM1|ENST00000528780.5|102878-HCT-15_RARE_RNA-P13A-and-102878-HCT-15_RARE_EXOME-P13A|13a|	IFITM1_p.P13A	13	HCT-15	IA	TRUE	FALSE	TRUE	TRUE
MLEANDGSGMLDEDEEDLQR	R	R	FALSE	FALSE	A	20	8	27	2	1	0	NA	P54252	P54252	2A		sp|P54252-2|ENSG00000066427.22|ATXN3|ENST00000644486.1|137174-HCT-15_SNP_RNA-V212M-and-137174-HCT-15_SNP_EXOME-V212M|212m|	ATXN3_p.V212M	212	HCT-15	IA	FALSE	TRUE	TRUE	TRUE
NESTRPSEELELDKWK	K	K	FALSE	FALSE	T	16	11	26	3	1	0	NA	Q7L0Y3	Q7L0Y3	2A		sp|Q7L0Y3|ENSG00000174173.6|TRMT10C|ENST00000309922.6|35912-HCT-15_SNP_RNA-P56R-and-35912-HCT-15_SNP_EXOME-P56R|56r|	TRMT10C_p.P56R	56	HCT-15	IA	FALSE	TRUE	TRUE	TRUE
NFGAENPDPFVPVLSTAVK	K	K	FALSE	FALSE	L	19	1	19	2	1	0	NA	Q9H583	Q9H583	2A		sp|Q9H583|ENSG00000119285.10|HEATR1|ENST00000366582.7|17722-HCT-15_SNP_RNA-N1694S-and-17722-HCT-15_SNP_EXOME-N1694S|1694s|	HEATR1_p.N1694S	1694	HCT-15	IA	FALSE	TRUE	TRUE	TRUE
NIGVIVVGFPATPIIESR	R	R	FALSE	FALSE	A	18	8	25	2	1	0	NA	O15270	O15270	2A		sp|O15270|ENSG00000100596.6|SPTLC2|ENST00000216484.6|136873-HCT-15_RARE_RNA-V494I-and-136873-HCT-15_RARE_EXOME-V494I|494i|	SPTLC2_p.V494I	494	HCT-15	IA	TRUE	FALSE	TRUE	TRUE
NLHQSGFSLSDAQIDDNIPR	R	R	FALSE	FALSE	R	20	10	29	2, 3	4	0	NA	Q16555	Q16555	2A		sp|Q16555-1|ENSG00000092964.17|DPYSL2|ENST00000311151.9|82262-HCT-15_RARE_EXOME-G543D|543d|	DPYSL2_p.G543D	543	HCT-15	IA	TRUE	FALSE	FALSE	TRUE
NMEIDLK	K	K	FALSE	FALSE	D	7	1	7	2	1	0	NA	P35580	P35580	2A		sp|P35580-1|ENSG00000133026.12|MYH10|ENST00000269243.8|162902-HCT-15_RARE_RNA-K1621N-and-162902-HCT-15_RARE_EXOME-K1621N|1621n|	MYH10_p.K1621N	1621	HCT-15	IA	TRUE	FALSE	TRUE	TRUE
NMEIDLKDLEAQIEAANK	K	K	FALSE	FALSE	A	18	1	18	3	1	0	2M(15.9949)	P35580	P35580	2A		sp|P35580-1|ENSG00000133026.12|MYH10|ENST00000269243.8|162902-HCT-15_RARE_RNA-K1621N-and-162902-HCT-15_RARE_EXOME-K1621N|1621n|	MYH10_p.K1621N	1621	HCT-15	IA	TRUE	FALSE	TRUE	TRUE
NPLLDLAAYDQEGR	R	R	FALSE	FALSE	R	14	1	14	2	2	0	NA	Q8TEM1	Q8TEM1	2A		sp|Q8TEM1-1|ENSG00000132182.11|NUP210|ENST00000254508.6|39494-HCT-15_SNP_RNA-R786L-and-39494-HCT-15_SNP_EXOME-R786L|786l|	NUP210_p.R786L	786	HCT-15	IA	FALSE	TRUE	TRUE	TRUE
NSLEFFTMLAQR	R	R	FALSE	FALSE	R	12	10	21	2	2	0	NA	Q9BVP2	Q9BVP2	2A		sp|Q9BVP2-1|ENSG00000163938.16|GNL3|ENST00000418458.5|35128-HCT-15_SNP_RNA-V367M-and-35128-HCT-15_SNP_EXOME-V367M|367m|	GNL3_p.V367M	367	HCT-15	IA	FALSE	TRUE	TRUE	TRUE
NTVLATWQPYSTSK	K	K	FALSE	FALSE	D	14	12	25	2	4	0	NA	Q9BY44	Q9BY44	2A		sp|Q9BY44-1|ENSG00000144895.11|EIF2A|ENST00000460851.5|37365-HCT-15_SNP_EXOME-T97S|97s|	EIF2A_p.T97S	97	HCT-15	IA	FALSE	TRUE	FALSE	TRUE
NVVYPLYQLGGPQLR	R	R	FALSE	FALSE	V	15	4	18	2	1	0	NA	Q16540	Q16540	2A		sp|Q16540|ENSG00000214026.10|MRPL23|ENST00000381519.5|103188-HCT-15_SNP_EXOME-R11Q|11q|	MRPL23_p.R11Q	11	HCT-15	IA	FALSE	TRUE	FALSE	TRUE
PEALFQPCFLGMESCDIHETTFNSIMK	C	K	TRUE	FALSE	S	27	1	27	3	2	0	15C(57.0215), 8C(57.0215)	A5A3E0	A5A3E0	2A	965972	sp|A5A3E0|ENSG00000196604.12|POTEF|ENST00000409914.6|29568-HCT-15_RARE_EXOME-G973D|973d|;sp|Q6S8J3-1|ENSG00000188219.14|POTEE|ENST00000356920.9|22005-HCT-15_RARE_EXOME-G973D|973d|	POTEF_p.G973D;POTEE_p.G973D	973	HCT-15	IA	TRUE	FALSE	FALSE	TRUE
PEEHPVLLTEAPLNPKANHEK	A	K	FALSE	FALSE	M	21	1	21	3	1	0	NA	Q6S8J3	Q6S8J3	2A		sp|Q6S8J3-1|ENSG00000188219.14|POTEE|ENST00000356920.9|22005-HCT-15_RARE_EXOME-R816H,22005-HCT-15_RARE_RNA-I803V|803v816h|	POTEE_p.R816H,I803V	816803	HCT-15	IA	TRUE	FALSE	TRUE	TRUE
PGELANHAVSEGTK	L	K	FALSE	FALSE	A	14	13	26	2	3	0	NA	Q99880	Q99880	2A		sp|Q99880|ENSG00000185130.5|HIST1H2BL|ENST00000377401.3|67796-HCT-15_RARE_RNA-K109N-and-67796-HCT-15_RARE_EXOME-K109N|109n|	HIST1H2BL_p.K109N	109	HCT-15	IA	TRUE	FALSE	TRUE	TRUE
PLAGTNGETTIQGLDGLSER	V	R	FALSE	FALSE	C	20	9	28	2	2	0	NA	P04075	P04075	2A		sp|P04075-1|ENSG00000149925.18|ALDOA|ENST00000569545.5|147948-HCT-15_RARE_EXOME-T125I|125i|	ALDOA_p.T125I	125	HCT-15	IA	TRUE	FALSE	FALSE	TRUE
PLPLPTEEGNPLLK	D	K	FALSE	FALSE	H	14	19	32	2	3	0	NA	Q15758	Q15758	2A		sp|Q15758-1|ENSG00000105281.12|SLC1A5|ENST00000542575.6|183329-HCT-15_SNP_RNA-V512L-and-183329-HCT-15_SNP_EXOME-V512L|512l|	SLC1A5_p.V512L	512	HCT-15	IA	FALSE	TRUE	TRUE	TRUE
QLWGLLIEEAEKR	K	R	FALSE	FALSE	H	13	1	13	3	2	0	NA	Q01082	Q01082	2A		sp|Q01082-1|ENSG00000115306.15|SPTBN1|ENST00000356805.8|19558-HCT-15_RARE_RNA-T1581A-and-19558-HCT-15_RARE_EXOME-T1581A|1581a|	SPTBN1_p.T1581A	1581	HCT-15	IA	TRUE	FALSE	TRUE	TRUE
QSGGSSQAGAVTVSDVQELMR	R	R	FALSE	FALSE	R	21	8	28	2	1	0	NA	O00233	O00233	2A		sp|O00233-1|ENSG00000110801.13|PSMD9|ENST00000541212.5|120676-HCT-15_SNP_RNA-V17A-and-120676-HCT-15_SNP_EXOME-V17A|17a|	PSMD9_p.V17A	17	HCT-15	IA	FALSE	TRUE	TRUE	TRUE
REPWLLPSQHNDIIQDALGQR	R	R	FALSE	FALSE	Y	21	12	32	4	1	0	NA	Q14697	Q14697	2A		sp|Q14697-1|ENSG00000089597.16|GANAB|ENST00000356638.7|112080-HCT-15_SNP_RNA-R698Q-and-112080-HCT-15_SNP_EXOME-R698Q|698q|	GANAB_p.R698Q	698	HCT-15	IA	FALSE	TRUE	TRUE	TRUE
RFEHLDPQNQHTFEAR	K	R	FALSE	FALSE	D	16	1	16	4	2	0	NA	Q02818	Q02818	2A		sp|Q02818|ENSG00000104805.15|NUCB1|ENST00000405315.8|177152-HCT-15_RARE_RNA-Q137R-and-177152-HCT-15_RARE_EXOME-Q137R|137r|	NUCB1_p.Q137R	137	HCT-15	IA	TRUE	FALSE	TRUE	TRUE
SALFAQINQGESITHALK	R	K	FALSE	FALSE	H	18	1	18	2, 3	22	0	NA	Q01518	Q01518	2A		sp|Q01518-1|ENSG00000131236.16|CAP1|ENST00000372797.7|2315-HCT-15_RARE_RNA-S256A-and-2315-HCT-15_RARE_EXOME-S256A|256a|	CAP1_p.S256A	256	HCT-15	IA	TRUE	FALSE	TRUE	TRUE
SALQSINEWAAQTTNGK	R	K	FALSE	FALSE	L	17	6	22	2	1	0	NA	P50454	P50454	2A		sp|P50454|ENSG00000149257.13|SERPINH1|ENST00000533603.5|107237-HCT-15_RARE_RNA-D182N-and-107237-HCT-15_RARE_EXOME-D182N|182n|	SERPINH1_p.D182N	182	HCT-15	IA	TRUE	FALSE	TRUE	TRUE
SALQSINEWAAQTTNGKLPEVTK	R	K	FALSE	FALSE	D	23	6	28	3	2	0	NA	P50454	P50454	2A		sp|P50454|ENSG00000149257.13|SERPINH1|ENST00000533603.5|107237-HCT-15_RARE_RNA-D182N-and-107237-HCT-15_RARE_EXOME-D182N|182n|	SERPINH1_p.D182N	182	HCT-15	IA	TRUE	FALSE	TRUE	TRUE
SCSYESASRSALFAQINQGESITHALK	L	K	FALSE	FALSE	H	27	1	27	3	1	0	2C(57.0215)	Q01518	Q01518	2A	247	sp|Q01518-1|ENSG00000131236.16|CAP1|ENST00000372797.7|2315-HCT-15_RARE_RNA-S256A-and-2315-HCT-15_RARE_EXOME-S256A|256a|	CAP1_p.S256A	256	HCT-15	IA	TRUE	FALSE	TRUE	TRUE
SELPLDPLPLPTEEGNPLLK	K	K	FALSE	FALSE	H	20	13	32	2	12	0	NA	Q15758	Q15758	2A		sp|Q15758-1|ENSG00000105281.12|SLC1A5|ENST00000542575.6|183329-HCT-15_SNP_RNA-V512L-and-183329-HCT-15_SNP_EXOME-V512L|512l|	SLC1A5_p.V512L	512	HCT-15	IA	FALSE	TRUE	TRUE	TRUE
SGHIQILLR	K	R	FALSE	FALSE	A	9	6	14	2	2	0	NA	Q9Y3A6	Q9Y3A6	2A		sp|Q9Y3A6-1|ENSG00000117500.12|TMED5|ENST00000370282.7|13293-HCT-15_SNP_RNA-T175I-and-13293-HCT-15_SNP_EXOME-T175I|175i|	TMED5_p.T175I	175	HCT-15	IA	FALSE	TRUE	TRUE	TRUE
SGVDTDSSYFK	K	K	FALSE	FALSE	L	11	10	20	2	2	0	NA	Q9Y394	Q9Y394	2A		sp|Q9Y394-1|ENSG00000100612.13|DHRS7|ENST00000216500.9|136144-HCT-15_RARE_EXOME-A326T|326t|	DHRS7_p.A326T	326	HCT-15	IA	TRUE	FALSE	FALSE	TRUE
SILGLPLLPEDSIK	R	K	FALSE	FALSE	V	14	1	14	2	4	0	NA	Q5VSL9	Q5VSL9	2A		sp|Q5VSL9-1|ENSG00000143093.14|STRIP1|ENST00000369795.7|4699-HCT-15_RARE_RNA-P319L-and-4699-HCT-15_RARE_EXOME-P319L|319l|	STRIP1_p.P319L	319	HCT-15	IA	TRUE	FALSE	TRUE	TRUE
SLGSLEGEAEAETSSPK	A	K	FALSE	FALSE	G	17	1	17	2	1	0	NA	Q09666	Q09666	2A		sp|Q09666-1|ENSG00000124942.13|AHNAK|ENST00000378024.8|112027-HCT-15_RARE_RNA-A5761T-and-112027-HCT-15_RARE_EXOME-A5761T|5761t|	AHNAK_p.A5761T	5761	HCT-15	IA	TRUE	FALSE	TRUE	TRUE
SLHQFLLEPITCHAWNMDR	M	R	FALSE	FALSE	T	19	2	20	3	3	0	12C(57.0215), 17M(15.9949), N-term(42.0106)	Q92747	Q92747	2A	13	sp|Q92747-1|ENSG00000241685.9|ARPC1A|ENST00000262942.9|74366-HCT-15_RARE_RNA-R18M-and-74366-HCT-15_RARE_EXOME-R18M|18m|	ARPC1A_p.R18M	18	HCT-15	IA	TRUE	FALSE	TRUE	TRUE
SMPIPIPK	K	K	FALSE	FALSE	A	8	14	21	2	1	0	2M(15.9949)	Q9BW04	Q9BW04	2A		sp|Q9BW04-1|ENSG00000182795.12|C1orf116|ENST00000359470.5|16857-HCT-15_SNP_RNA-S444P-and-16857-HCT-15_SNP_EXOME-S444P|444p|	C1orf116_p.S444P	444	HCT-15	IA	FALSE	TRUE	TRUE	TRUE
SNYSFEKPFLWLAR	K	R	FALSE	FALSE	K	14	15	28	2, 3	8	0	NA	P62826	P62826	2A		sp|P62826|ENSG00000132341.11|RAN|ENST00000543796.5|121053-HCT-15_RARE_RNA-N156S-and-121053-HCT-15_RARE_EXOME-N156S|156s|	RAN_p.N156S	156	HCT-15	IA	TRUE	FALSE	TRUE	TRUE
SPMVPLPMPK	R	K	FALSE	FALSE	K	10	9	18	2	1	0	NA	P43155	P43155	2A		sp|P43155-1|ENSG00000095321.16|CRAT|ENST00000318080.6|95526-HCT-15_SNP_RNA-L372M-and-95526-HCT-15_SNP_EXOME-L372M|372m|	CRAT_p.L372M	372	HCT-15	IA	FALSE	TRUE	TRUE	TRUE
SPVLHFYVRPSGHEGAASGHTR	M	R	FALSE	FALSE	R	22	1	22	5	1	0	N-term(42.0106)	O15067	O15067	2A		sp|O15067|ENSG00000178921.13|PFAS|ENST00000314666.10|156540-HCT-15_SNP_RNA-P19S-and-156540-HCT-15_SNP_EXOME-P19S|19s|	PFAS_p.P19S	19	HCT-15	IA	FALSE	TRUE	TRUE	TRUE
SQAQILLR	R	R	FALSE	FALSE	W	8	1	8	2	2	0	NA	P14550	P14550	2A		sp|P14550|ENSG00000117448.13|AKR1A1|ENST00000372070.7|2889-HCT-15_RARE_RNA-P245Q-and-2889-HCT-15_RARE_EXOME-P245Q|245q|	AKR1A1_p.P245Q	245	HCT-15	IA	TRUE	FALSE	TRUE	TRUE
SQIFSIASDNQPTVTIK	K	K	FALSE	FALSE	V	17	11	27	2	11	0	NA	P11021	P11021	2A		sp|P11021|ENSG00000044574.7|HSPA5|ENST00000324460.6|95250-HCT-15_RARE_RNA-T453I-and-95250-HCT-15_RARE_EXOME-T453I|453i|	HSPA5_p.T453I	453	HCT-15	IA	TRUE	FALSE	TRUE	TRUE
SRELDECFAQANDQMETLDSLIR	R	R	FALSE	FALSE	E	23	1	23	3	1	0	7C(57.0215)	P15924	P15924	2A	110	sp|P15924-1|ENSG00000096696.13|DSP|ENST00000379802.7|62914-HCT-15_RARE_RNA-I120T-and-62914-HCT-15_RARE_EXOME-I120T|120t|	DSP_p.I120T	120	HCT-15	IA	TRUE	FALSE	TRUE	TRUE
SSGGPGAGLCLFPLDEVHAK	R	K	FALSE	FALSE	M	20	6	25	3	2	0	10C(57.0215)	O15031	O15031	2A	312	sp|O15031|ENSG00000196576.14|PLXNB2|ENST00000359337.8|196445-HCT-15_SNP_RNA-K318E-and-196445-HCT-15_SNP_EXOME-K318E|318e|	PLXNB2_p.K318E	318	HCT-15	IA	FALSE	TRUE	TRUE	TRUE
SSGSYESASRSSLFAQINQGESITHALK	T	K	FALSE	FALSE	H	28	1	28	3	5	0	NA	Q01518	Q01518	2A		sp|Q01518-1|ENSG00000131236.16|CAP1|ENST00000372797.7|2315-HCT-15_RARE_EXOME-I245S,2315-HCT-15_RARE_EXOME-C247G|245s247g|	CAP1_p.I245S,C247G	245247	HCT-15	IA	TRUE	FALSE	FALSE	TRUE
SSSSSSQPEHIAMLVSTAASPSLIK	K	K	FALSE	FALSE	E	25	7	31	3	4	0	NA	P42166	P42166	2A		sp|P42166-1|ENSG00000120802.13|TMPO|ENST00000266732.8|119626-HCT-15_RARE_RNA-S301I-and-119626-HCT-15_RARE_EXOME-S301I|301i|	TMPO_p.S301I	301	HCT-15	IA	TRUE	FALSE	TRUE	TRUE
SVGGSGVGSFGDNLVTR	R	R	FALSE	FALSE	S	17	6	22	2	1	0	NA	P02545	P02545	2A		sp|P02545-1|ENSG00000160789.19|LMNA|ENST00000368300.8|6152-HCT-15_RARE_RNA-G634V-and-6152-HCT-15_RARE_EXOME-G634V|634v|	LMNA_p.G634V	634	HCT-15	IA	TRUE	FALSE	TRUE	TRUE
SVVSDVPEELDFLVPK	K	K	FALSE	FALSE	A	16	15	30	2	1	0	NA	Q14966	Q14966	2A		sp|Q14966-1|ENSG00000075292.18|ZNF638|ENST00000264447.8|20090-HCT-15_SNP_RNA-A1912V-and-20090-HCT-15_SNP_EXOME-A1912V|1912v|	ZNF638_p.A1912V	1912	HCT-15	IA	FALSE	TRUE	TRUE	TRUE
SWTAADMAAQTTK	R	K	FALSE	FALSE	R	13	1	13	2	1	0	NA	P04439	P04439	2A		sp|P04439|ENSG00000206503.12|HLA-A|ENST00000396634.5|63676-HCT-15_RARE_EXOME-I166T|166t|	HLA-A_p.I166T	166	HCT-15	IA	TRUE	FALSE	FALSE	TRUE
TATLQQAQEVHEK	K	K	FALSE	FALSE	L	13	18	30	2, 3	9	0	NA	P60174	P60174	2A		sp|P60174-3|ENSG00000111669.14|TPI1|ENST00000229270.8|115949-HCT-15_RARE_EXOME-P216L|216l|	TPI1_p.P216L	216	HCT-15	IA	TRUE	FALSE	FALSE	TRUE
TATLQQAQEVHEKLR	K	R	FALSE	FALSE	G	15	18	32	3, 4	8	0	NA	P60174	P60174	2A		sp|P60174-3|ENSG00000111669.14|TPI1|ENST00000229270.8|115949-HCT-15_RARE_EXOME-P216L|216l|	TPI1_p.P216L	216	HCT-15	IA	TRUE	FALSE	FALSE	TRUE
TDVPIYDGSWVEWYMR	K	R	FALSE	FALSE	A	16	1	16	2	1	0	NA	P25325	P25325	2A		sp|P25325-1|ENSG00000128309.16|MPST|ENST00000401419.7|193484-HCT-15_RARE_RNA-P267T-and-193484-HCT-15_RARE_EXOME-P267T|267t|	MPST_p.P267T	267	HCT-15	IA	TRUE	FALSE	TRUE	TRUE
TGGSAQPETPYSGHGLLIDSLVLLPR	R	R	FALSE	FALSE	V	26	1	26	3	1	0	NA	P55268	P55268	2A		sp|P55268|ENSG00000172037.13|LAMB2|ENST00000418109.5|40862-HCT-15_RARE_RNA-P711H-and-40862-HCT-15_RARE_EXOME-P711H|711h|	LAMB2_p.P711H	711	HCT-15	IA	TRUE	FALSE	TRUE	TRUE
TGWAVEQELASLEK	R	K	FALSE	FALSE	G	14	21	34	2	2	0	NA	Q8NEM2	Q8NEM2	2A		sp|Q8NEM2|ENSG00000171241.8|SHCBP1|ENST00000303383.7|153564-HCT-15_SNP_RNA-M21T-and-153564-HCT-15_SNP_EXOME-M21T|21t|	SHCBP1_p.M21T	21	HCT-15	IA	FALSE	TRUE	TRUE	TRUE
TLDPFETMLK	K	K	FALSE	FALSE	S	10	10	19	2	1	0	NA	Q6UW02	Q6UW02	2A		sp|Q6UW02-1|ENSG00000119004.15|CYP20A1|ENST00000356079.8|23869-HCT-15_SNP_EXOME-S97L|97l|	CYP20A1_p.S97L	97	HCT-15	IA	FALSE	TRUE	FALSE	TRUE
TLQALEFHTVPFQLLTR	K	R	FALSE	FALSE	Y	17	32	48	2, 3	2	0	NA	Q08380	Q08380	2A		sp|Q08380|ENSG00000108679.12|LGALS3BP|ENST00000262776.7|167811-HCT-15_RARE_RNA-A392T-and-167811-HCT-15_RARE_EXOME-A392T|392t|	LGALS3BP_p.A392T	392	HCT-15	IA	TRUE	FALSE	TRUE	TRUE
TMQGSEVVSVLK	K	K	FALSE	FALSE	S	12	19	30	2	7	0	2M(15.9949)	Q8WUM4	Q8WUM4	2A		sp|Q8WUM4-1|ENSG00000170248.13|PDCD6IP|ENST00000307296.7|33852-HCT-15_SNP_EXOME-N550S|550s|	PDCD6IP_p.N550S	550	HCT-15	IA	FALSE	TRUE	FALSE	TRUE
TNFFIQLVRPSVAQPEDTVQFR	R	R	FALSE	FALSE	L	22	1	22	3	1	0	NA	Q16540	Q16540	2A		sp|Q16540|ENSG00000214026.10|MRPL23|ENST00000381519.5|103188-HCT-15_SNP_RNA-G32S-and-103188-HCT-15_SNP_EXOME-G32S|32s|	MRPL23_p.G32S	32	HCT-15	IA	FALSE	TRUE	TRUE	TRUE
TNVFAPDFIAGVSPFVENDISSR	K	R	FALSE	FALSE	S	23	1	23	2	1	0	NA	Q9ULX3	Q9ULX3	2A		sp|Q9ULX3|ENSG00000141101.12|NOB1|ENST00000268802.9|154597-HCT-15_SNP_RNA-Y366F-and-154597-HCT-15_SNP_EXOME-Y366F|366f|	NOB1_p.Y366F	366	HCT-15	IA	FALSE	TRUE	TRUE	TRUE
TPVLFDVYEIK	K	K	FALSE	FALSE	E	11	10	20	2	4	0	NA	P50995	P50995	2A		sp|P50995-1|ENSG00000122359.17|ANXA11|ENST00000372231.7|101453-HCT-15_SNP_RNA-I278V-and-101453-HCT-15_SNP_EXOME-I278V|278v|	ANXA11_p.I278V	278	HCT-15	IA	FALSE	TRUE	TRUE	TRUE
TPVLFDVYEIKEAIK	K	K	FALSE	FALSE	G	15	10	24	3	2	0	NA	P50995	P50995	2A		sp|P50995-1|ENSG00000122359.17|ANXA11|ENST00000372231.7|101453-HCT-15_SNP_RNA-I278V-and-101453-HCT-15_SNP_EXOME-I278V|278v|	ANXA11_p.I278V	278	HCT-15	IA	FALSE	TRUE	TRUE	TRUE
TQNKEESYDFFK	K	K	FALSE	FALSE	S	12	1	12	3	1	0	NA	Q9UDY2	Q9UDY2	2A		sp|Q9UDY2-1|ENSG00000119139.18|TJP2|ENST00000377245.8|90437-HCT-15_SNP_RNA-S1010F-and-90437-HCT-15_SNP_EXOME-S1010F|1010f|	TJP2_p.S1010F	1010	HCT-15	IA	FALSE	TRUE	TRUE	TRUE
TTGIVMDSGDGVTHTVPIYEGYALPHAILCLDLAGR	R	R	FALSE	FALSE	D	36	32	67	4	4	0	30C(57.0215), 6M(15.9949)	P60709	P60709	2A	177	sp|P60709|ENSG00000075624.14|ACTB|ENST00000646664.1|76882-HCT-15_RARE_RNA-R177C-and-76882-HCT-15_RARE_EXOME-R177C|177c|	ACTB_p.R177C	177	HCT-15	IA	TRUE	FALSE	TRUE	TRUE
VALEELENKPR	R	R	FALSE	FALSE	K	11	1	11	3	1	0	NA	Q5T4S7	Q5T4S7	2A		sp|Q5T4S7-1|ENSG00000127481.14|UBR4|ENST00000375254.7|10433-HCT-15_SNP_RNA-M4867L-and-10433-HCT-15_SNP_EXOME-M4867L|4867l|	UBR4_p.M4867L	4867	HCT-15	IA	FALSE	TRUE	TRUE	TRUE
VDKGVVPLAGTNGETTIQGLDGLSER	K	R	FALSE	FALSE	C	26	3	28	2, 3	10	0	NA	P04075	P04075	2A		sp|P04075-1|ENSG00000149925.18|ALDOA|ENST00000569545.5|147948-HCT-15_RARE_EXOME-T125I|125i|	ALDOA_p.T125I	125	HCT-15	IA	TRUE	FALSE	FALSE	TRUE
VEFATLQEALAHALMEK	R	K	FALSE	FALSE	E	17	1	17	3	4	0	15M(15.9949)	Q14980	Q14980	2A		sp|Q14980-1|ENSG00000137497.17|NUMA1|ENST00000393695.7|113171-HCT-15_SNP_RNA-T1057M-and-113171-HCT-15_SNP_EXOME-T1057M|1057m|	NUMA1_p.T1057M	1057	HCT-15	IA	FALSE	TRUE	TRUE	TRUE
VILLDIAR	R	R	FALSE	FALSE	G	8	26	33	2	1	0	NA	Q9H2M9	Q9H2M9	2A		sp|Q9H2M9-1|ENSG00000118873.15|RAB3GAP2|ENST00000358951.6|17140-HCT-15_SNP_RNA-V413I-and-17140-HCT-15_SNP_EXOME-V413I|413i|	RAB3GAP2_p.V413I	413	HCT-15	IA	FALSE	TRUE	TRUE	TRUE
VLEVEKEYTEELR	R	R	FALSE	FALSE	Q	13	5	17	3	2	0	NA	Q9UKJ3	Q9UKJ3	2A		sp|Q9UKJ3-1|ENSG00000186566.12|GPATCH8|ENST00000591680.5|165521-HCT-15_RARE_RNA-D107Y-and-165521-HCT-15_RARE_EXOME-D107Y|107y|	GPATCH8_p.D107Y	107	HCT-15	IA	TRUE	FALSE	TRUE	TRUE
VLFPGCTPPAYLLDGLVR	R	R	FALSE	FALSE	L	18	6	23	2	1	0	6C(57.0215)	Q66K74	Q66K74	2A	435	sp|Q66K74-1|ENSG00000130479.10|MAP1S|ENST00000324096.8|174443-HCT-15_SNP_RNA-C440Y-and-174443-HCT-15_SNP_EXOME-C440Y|440y|	MAP1S_p.C440Y	440	HCT-15	IA	FALSE	TRUE	TRUE	TRUE
VLHASLQSVLHKEESLGPK	K	K	FALSE	FALSE	R	19	7	25	4	1	0	NA	Q15024	Q15024	2A		sp|Q15024|ENSG00000075914.12|EXOSC7|ENST00000265564.7|34435-HCT-15_SNP_RNA-V274L-and-34435-HCT-15_SNP_EXOME-V274L|274l|	EXOSC7_p.V274L	274	HCT-15	IA	FALSE	TRUE	TRUE	TRUE
VMQVVDEKLPGLLGNFPGPFEEEMK	K	K	FALSE	FALSE	G	25	1	25	3	2	0	2M(15.9949)	Q13510	Q13510	2A		sp|Q13510-1|ENSG00000104763.18|ASAH1|ENST00000637790.1|85579-HCT-15_SNP_RNA-I93V-and-85579-HCT-15_SNP_EXOME-I93V|93v|	ASAH1_p.I93V	93	HCT-15	IA	FALSE	TRUE	TRUE	TRUE
VNLEEQLKETVEK	K	K	FALSE	FALSE	Y	13	9	21	2, 3	5	0	NA	Q9HAV7	Q9HAV7	2A		sp|Q9HAV7|ENSG00000109519.12|GRPEL1|ENST00000264954.4|49557-HCT-15_RARE_RNA-K66N-and-49557-HCT-15_RARE_EXOME-K66N|66n|	GRPEL1_p.K66N	66	HCT-15	IA	TRUE	FALSE	TRUE	TRUE
VQVLAAQLLSEMK	R	K	FALSE	FALSE	L	13	11	23	2	3	0	NA	Q6P9B6	Q6P9B6	2A		sp|Q6P9B6|ENSG00000140950.15|TLDC1|ENST00000343629.10|155273-HCT-15_SNP_RNA-D172E-and-155273-HCT-15_SNP_EXOME-D172E|172e|	TLDC1_p.D172E	172	HCT-15	IA	FALSE	TRUE	TRUE	TRUE
VSHLPLVEELR	R	R	FALSE	FALSE	S	11	1	11	3	3	0	NA	P49736	P49736	2A		sp|P49736|ENSG00000073111.13|MCM2|ENST00000265056.11|36591-HCT-15_RARE_RNA-I285V-and-36591-HCT-15_RARE_EXOME-I285V|285v|	MCM2_p.I285V	285	HCT-15	IA	TRUE	FALSE	TRUE	TRUE
VSIAELAQASNSLITWGR	R	R	FALSE	FALSE	E	18	5	22	2	2	0	NA	Q96HY6	Q96HY6	2A		sp|Q96HY6-1|ENSG00000198171.12|DDRGK1|ENST00000354488.7|187610-HCT-15_SNP_RNA-A303T-and-187610-HCT-15_SNP_EXOME-A303T|303t|	DDRGK1_p.A303T	303	HCT-15	IA	FALSE	TRUE	TRUE	TRUE
VVDNTTAKEFAGSLGIPFLETSAK	K	K	FALSE	FALSE	N	24	4	27	3	4	0	NA	Q9H0U4	Q9H0U4	2A		sp|Q9H0U4|ENSG00000174903.15|RAB1B|ENST00000311481.10|106330-HCT-15_RARE_RNA-D141G-and-106330-HCT-15_RARE_EXOME-D141G|141g|	RAB1B_p.D141G	141	HCT-15	IA	TRUE	FALSE	TRUE	TRUE
WGQIILK	R	K	FALSE	FALSE	N	7	5	11	2	3	0	NA	Q9H4A4	Q9H4A4	2A		sp|Q9H4A4|ENSG00000176393.10|RNPEP|ENST00000295640.8|7673-HCT-15_SNP_RNA-V579I-and-7673-HCT-15_SNP_EXOME-V579I|579i|	RNPEP_p.V579I	579	HCT-15	IA	FALSE	TRUE	TRUE	TRUE
WLSTSIPEAQWHSSLSR	R	R	FALSE	FALSE	T	17	6	22	2, 3	5	0	NA	P49327	P49327	2A		sp|P49327|ENSG00000169710.8|FASN|ENST00000306749.3|168265-HCT-15_SNP_RNA-A727S-and-168265-HCT-15_SNP_EXOME-A727S|727s|	FASN_p.A727S	727	HCT-15	IA	FALSE	TRUE	TRUE	TRUE
YASICQQNGIVPIVEPEILPDGGHDLK	R	K	FALSE	FALSE	R	27	1	27	3	2	0	5C(57.0215)	P04075	P04075	2A	178	sp|P04075-1|ENSG00000149925.18|ALDOA|ENST00000569545.5|147948-HCT-15_RARE_RNA-D196G-and-147948-HCT-15_RARE_EXOME-D196G|196g|	ALDOA_p.D196G	196	HCT-15	IA	TRUE	FALSE	TRUE	TRUE
YASICQQNGIVPIVEPEILPDGGHDLKR	R	R	FALSE	FALSE	C	28	1	28	3, 4	10	0	5C(57.0215)	P04075	P04075	2A	178	sp|P04075-1|ENSG00000149925.18|ALDOA|ENST00000569545.5|147948-HCT-15_RARE_RNA-D196G-and-147948-HCT-15_RARE_EXOME-D196G|196g|	ALDOA_p.D196G	196	HCT-15	IA	TRUE	FALSE	TRUE	TRUE
YELTEISNVDVETQSGK	R	K	FALSE	FALSE	T	17	6	22	2	2	0	NA	Q09666	Q09666	2A		sp|Q09666-1|ENSG00000124942.13|AHNAK|ENST00000378024.8|112027-HCT-15_RARE_RNA-H187Y-and-112027-HCT-15_RARE_EXOME-H187Y|187y|	AHNAK_p.H187Y	187	HCT-15	IA	TRUE	FALSE	TRUE	TRUE
YFVEAGDMAVR	K	R	FALSE	FALSE	R	11	24	34	2	1	0	NA	P17987	P17987	2A		sp|P17987|ENSG00000120438.11|TCP1|ENST00000321394.11|71383-HCT-15_RARE_RNA-A305D-and-71383-HCT-15_RARE_EXOME-A305D|305d|	TCP1_p.A305D	305	HCT-15	IA	TRUE	FALSE	TRUE	TRUE
YSLIDPSSAPELLR	R	R	FALSE	FALSE	L	14	10	23	2	2	0	NA	Q9UDT6	Q9UDT6	2A		sp|Q9UDT6-1|ENSG00000106665.15|CLIP2|ENST00000395060.5|73639-HCT-15_SNP_RNA-R977P-and-73639-HCT-15_SNP_EXOME-R977P|977p|	CLIP2_p.R977P	977	HCT-15	IA	FALSE	TRUE	TRUE	TRUE
YSTTALLEQLEETTR	R	R	FALSE	FALSE	E	15	1	15	2	2	0	NA	Q53EZ4	Q53EZ4	2A		sp|Q53EZ4-1|ENSG00000138180.15|CEP55|ENST00000371485.7|98397-HCT-15_SNP_RNA-T99A-and-98397-HCT-15_SNP_EXOME-T99A|99a|	CEP55_p.T99A	99	HCT-15	IA	FALSE	TRUE	TRUE	TRUE
YTALDKWTNHLNSLNQAVVSK	R	K	FALSE	FALSE	L	21	3	23	3	1	0	NA	P61201	P61201	2A		sp|P61201-1|ENSG00000166200.14|COPS2|ENST00000388901.9|142973-HCT-15_RARE_RNA-Q430H-and-142973-HCT-15_RARE_EXOME-Q430H|430h|	COPS2_p.Q430H	430	HCT-15	IA	TRUE	FALSE	TRUE	TRUE
YTLPPGVDPAQVSSSLSPEGTLTVEAPMPK	K	K	FALSE	FALSE	L	30	8	37	2	2	0	NA	P04792	P04792	2A		sp|P04792|ENSG00000106211.8|HSPB1|ENST00000248553.6|73783-HCT-15_RARE_RNA-T151A-and-73783-HCT-15_RARE_EXOME-T151A|151a|	HSPB1_p.T151A	151	HCT-15	IA	TRUE	FALSE	TRUE	TRUE
AAAAAAAAAPAAAATAATTAATTAATAAQ	K	Q	FALSE	FALSE	-	29	6	34	2	5	0	NA	P37108	P37108	2B		sp|P37108|ENSG00000140319.10|SRP14|ENST00000267884.10|142380-HCT-15_SNP_RNA-P124A-and-142380-HCT-15_SNP_EXOME-P124A|124a|	SRP14_p.P124A	124	HCT-15	IA	FALSE	TRUE	TRUE	TRUE
AAAVRPDLAQLMNSSGSHK	M	K	FALSE	FALSE	D	19	2	20	3	5	0	N-term(42.0106)	Q9BT78	Q9BT78	2B		sp|Q9BT78-1|ENSG00000138663.8|COPS4|ENST00000264389.6|47267-HCT-15_RARE_RNA-Q7P-and-47267-HCT-15_RARE_EXOME-Q7P|7p|	COPS4_p.Q7P	7	HCT-15	IA	TRUE	FALSE	TRUE	TRUE
AALVDLEPCTMDSVR	R	R	FALSE	FALSE	S	15	7	21	2	5	0	9C(57.0215)	Q9BUF5	Q9BUF5	2B	71	sp|Q9BUF5|ENSG00000176014.12|TUBB6|ENST00000317702.9|168837-HCT-15_RARE_RNA-G71C-and-168837-HCT-15_RARE_EXOME-G71C|71c|	TUBB6_p.G71C	71	HCT-15	IA	TRUE	FALSE	TRUE	TRUE
AAVPAPEEEMDECEQALAAEPK	K	K	FALSE	FALSE	A	22	8	29	2	15	0	13C(57.0215)	P26641	P26641	2B	266	sp|P26641-1|ENSG00000254772.9|EEF1G|ENST00000329251.4|112031-HCT-15_RARE_RNA-A256V-and-112031-HCT-15_RARE_EXOME-A256V|256v|	EEF1G_p.A256V	256	HCT-15	IA	TRUE	FALSE	TRUE	TRUE
AEAMDVDTPSGTNSGAGKK	M	K	FALSE	FALSE	R	19	2	20	2	1	0	N-term(42.0106)	P62877	P62877	2B		sp|P62877|ENSG00000100387.8|RBX1|ENST00000216225.8|193858-HCT-15_RARE_RNA-A3E-and-193858-HCT-15_RARE_EXOME-A3E|3e|	RBX1_p.A3E	3	HCT-15	IA	TRUE	FALSE	TRUE	TRUE
AENTEGDLNSNLPHAPYHTGDPQLDTAIGQWLR	M	R	FALSE	FALSE	W	33	2	34	3	1	0	N-term(42.0106)	Q6PCE3	Q6PCE3	2B		sp|Q6PCE3|ENSG00000165434.7|PGM2L1|ENST00000298198.4|113409-HCT-15_SNP_EXOME-L14P|14p|	PGM2L1_p.L14P	14	HCT-15	IA	FALSE	TRUE	FALSE	TRUE
AFSEYLGTDQSK	K	K	FALSE	FALSE	W	12	22	33	2	5	0	NA	P10768	P10768	2B		sp|P10768|ENSG00000139684.13|ESD|ENST00000378720.7|129610-HCT-15_SNP_RNA-G190E-and-129610-HCT-15_SNP_EXOME-G190E|190e|	ESD_p.G190E	190	HCT-15	IA	FALSE	TRUE	TRUE	TRUE
AFSEYLGTDQSKWK	K	K	FALSE	FALSE	A	14	22	35	3	2	0	NA	P10768	P10768	2B		sp|P10768|ENSG00000139684.13|ESD|ENST00000378720.7|129610-HCT-15_SNP_RNA-G190E-and-129610-HCT-15_SNP_EXOME-G190E|190e|	ESD_p.G190E	190	HCT-15	IA	FALSE	TRUE	TRUE	TRUE
AFSSLNTLPEELRPYVPLFCSILTK	R	K	FALSE	FALSE	L	25	1	25	3	1	0	20C(57.0215)	Q5JRX3	Q5JRX3	2B	619	sp|Q5JRX3-1|ENSG00000107959.15|PITRM1|ENST00000224949.8|99606-HCT-15_SNP_RNA-V621I-and-99606-HCT-15_SNP_EXOME-V621I|621i|	PITRM1_p.V621I	621	HCT-15	IA	FALSE	TRUE	TRUE	TRUE
AGALMMPLVDQLENR	R	R	FALSE	FALSE	L	15	1	15	2	2	0	5M(15.9949)	Q9H583	Q9H583	2B		sp|Q9H583|ENSG00000119285.10|HEATR1|ENST00000366582.7|17722-HCT-15_SNP_RNA-E2017G-and-17722-HCT-15_SNP_EXOME-E2017G|2017g|	HEATR1_p.E2017G	2017	HCT-15	IA	FALSE	TRUE	TRUE	TRUE
AGEMVPPAMYQFSQYVCQQTGLQIPQLPAPPK	K	K	FALSE	FALSE	L	32	10	41	3	1	0	17C(57.0215)	Q5XKP0	Q5XKP0	2B	60	sp|Q5XKP0|ENSG00000174917.8|C19orf70|ENST00000309324.8|179455-HCT-15_RARE_RNA-V47M-and-179455-HCT-15_RARE_EXOME-V47M|47m|	C19orf70_p.V47M	47	HCT-15	IA	TRUE	FALSE	TRUE	TRUE
AGGPAAAEPLLAAEKAEEPGDGPAEEWLGR	K	R	FALSE	FALSE	A	30	3	32	3	1	0	NA	Q587I9	Q587I9	2B		sp|Q587I9|ENSG00000173349.5|SFT2D3|ENST00000310981.5|21862-HCT-15_SNP_EXOME-R38G|38g|	SFT2D3_p.R38G	38	HCT-15	IA	FALSE	TRUE	FALSE	TRUE
AGHQSAAASNLSGLSLQEAQQILNVSK	R	K	FALSE	FALSE	L	27	5	31	3	4	0	NA	Q9Y3D7	Q9Y3D7	2B		sp|Q9Y3D7|ENSG00000217930.7|PAM16|ENST00000318059.7|151848-HCT-15_SNP_RNA-R44Q-and-151848-HCT-15_SNP_EXOME-R44Q|44q|	PAM16_p.R44Q	44	HCT-15	IA	FALSE	TRUE	TRUE	TRUE
AGVAAPATQVVQVTLQSVQR	K	R	FALSE	FALSE	R	20	5	24	2	1	0	NA	Q15149	Q15149	2B		sp|Q15149-1|ENSG00000178209.14|PLEC|ENST00000322810.8|89058-HCT-15_SNP_RNA-A641V-and-89058-HCT-15_SNP_EXOME-A641V|641v|	PLEC_p.A641V	641	HCT-15	IA	FALSE	TRUE	TRUE	TRUE
AHAFVVQQK	K	K	FALSE	FALSE	E	9	1	9	2	6	0	NA	Q15149	Q15149	2B		sp|Q15149-1|ENSG00000178209.14|PLEC|ENST00000322810.8|89058-HCT-15_SNP_RNA-A2194V-and-89058-HCT-15_SNP_EXOME-A2194V|2194v|	PLEC_p.A2194V	2194	HCT-15	IA	FALSE	TRUE	TRUE	TRUE
AHGAPINSLLLVDENVLATGDDTGGIR	K	R	FALSE	FALSE	L	27	1	27	3	1	0	NA	Q9H6Y2	Q9H6Y2	2B		sp|Q9H6Y2-1|ENSG00000120314.18|WDR55|ENST00000358337.9|56558-HCT-15_SNP_RNA-C151R-and-56558-HCT-15_SNP_EXOME-C151R|151r|	WDR55_p.C151R	151	HCT-15	IA	FALSE	TRUE	TRUE	TRUE
AIILDLSCNK	K	K	FALSE	FALSE	L	10	10	19	2	5	0	8C(57.0215)	Q96AG4	Q96AG4	2B	48	sp|Q96AG4|ENSG00000108829.9|LRRC59|ENST00000225972.7|166134-HCT-15_RARE_RNA-T42I-and-166134-HCT-15_RARE_EXOME-T42I|42i|	LRRC59_p.T42I	42	HCT-15	IA	TRUE	FALSE	TRUE	TRUE
AIVSQQFVEMTR	K	R	FALSE	FALSE	T	12	6	17	2	3	0	NA	P48444	P48444	2B		sp|P48444-1|ENSG00000095139.13|ARCN1|ENST00000264028.4|108466-HCT-15_SNP_RNA-R19Q-and-108466-HCT-15_SNP_EXOME-R19Q|19q|	ARCN1_p.R19Q	19	HCT-15	IA	FALSE	TRUE	TRUE	TRUE
ALLNAESLPTHR	R	R	FALSE	FALSE	K	12	7	18	3	1	0	NA	Q9NVH0	Q9NVH0	2B		sp|Q9NVH0-1|ENSG00000081177.18|EXD2|ENST00000409018.7|132538-HCT-15_SNP_RNA-Q518H-and-132538-HCT-15_SNP_EXOME-Q518H|518h|	EXD2_p.Q518H	518	HCT-15	IA	FALSE	TRUE	TRUE	TRUE
ALPHAILCLDLAGR	Y	R	FALSE	FALSE	D	14	54	67	3	1	0	8C(57.0215)	P60709	P60709	2B	177	sp|P60709|ENSG00000075624.14|ACTB|ENST00000646664.1|76882-HCT-15_RARE_RNA-R177C-and-76882-HCT-15_RARE_EXOME-R177C|177c|	ACTB_p.R177C	177	HCT-15	IA	TRUE	FALSE	TRUE	TRUE
ALREWEEAER	R	R	FALSE	FALSE	A	10	1	10	3	1	0	NA	Q14244	Q14244	2B		sp|Q14244-1|ENSG00000135525.18|MAP7|ENST00000354570.7|70864-HCT-15_SNP_RNA-R558W-and-70864-HCT-15_SNP_EXOME-R558W|558w|	MAP7_p.R558W	558	HCT-15	IA	FALSE	TRUE	TRUE	TRUE
ALTAQLPVLPR	R	R	FALSE	FALSE	S	11	21	31	2	1	0	NA	Q96GK7	Q96GK7	2B		sp|Q96GK7|ENSG00000115042.9|FAHD2A|ENST00000447036.5|20778-HCT-15_RARE_EXOME-A85T|85t|	FAHD2A_p.A85T	85	HCT-15	IA	TRUE	FALSE	FALSE	TRUE
ANHAVSEGTK	L	K	FALSE	FALSE	A	10	17	26	2	1	0	NA	Q99880	Q99880	2B		sp|Q99880|ENSG00000185130.5|HIST1H2BL|ENST00000377401.3|67796-HCT-15_RARE_RNA-K109N-and-67796-HCT-15_RARE_EXOME-K109N|109n|	HIST1H2BL_p.K109N	109	HCT-15	IA	TRUE	FALSE	TRUE	TRUE
ANLYPVASLFTQK	K	K	FALSE	FALSE	R	13	7	19	2	1	0	NA	Q8NCN5	Q8NCN5	2B		sp|Q8NCN5-1|ENSG00000090857.13|PDPR|ENST00000288050.8|149914-HCT-15_RARE_RNA-K854N-and-149914-HCT-15_RARE_EXOME-K854N|854n|	PDPR_p.K854N	854	HCT-15	IA	TRUE	FALSE	TRUE	TRUE
APADPAPAPADPASPQHQPAGPAPLLSTPAPEARPVIGALGL	R	L	FALSE	FALSE	-	42	5	46	3	2	0	NA	Q96AD5	Q96AD5	2B		sp|Q96AD5-1|ENSG00000177666.16|PNPLA2|ENST00000336615.8|103004-HCT-15_SNP_RNA-L481P-and-103004-HCT-15_SNP_EXOME-L481P|481p|	PNPLA2_p.L481P	481	HCT-15	IA	FALSE	TRUE	TRUE	TRUE
APHNPAPPMSTVIHIR	G	R	FALSE	FALSE	S	16	1	16	4	2	0	NA	Q01629	Q01629	2B		sp|Q01629|ENSG00000185201.16|IFITM2|ENST00000616316.1|102873-HCT-15_SNP_RNA-V33A-and-102873-HCT-15_SNP_EXOME-V33A|33a|	IFITM2_p.V33A	33	HCT-15	IA	FALSE	TRUE	TRUE	TRUE
APKPEDIDEEYDDVPDLVENFDEASK	K	K	FALSE	FALSE	N	26	3	28	3	1	0	NA	Q96K17	Q96K17	2B		sp|Q96K17-1|ENSG00000134717.17|BTF3L4|ENST00000313334.12|3146-HCT-15_RARE_RNA-D139Y-and-3146-HCT-15_RARE_EXOME-D139Y|139y|	BTF3L4_p.D139Y	139	HCT-15	IA	TRUE	FALSE	TRUE	TRUE
APPMPGPVPEAAQPFLFTPR	K	R	FALSE	FALSE	G	20	1	20	2	1	0	NA	Q7Z406	Q7Z406	2B		sp|Q7Z406-1|ENSG00000105357.16|MYH14|ENST00000376970.6|177517-HCT-15_RARE_RNA-R16M-and-177517-HCT-15_RARE_EXOME-R16M|16m|	MYH14_p.R16M	16	HCT-15	IA	TRUE	FALSE	TRUE	TRUE
APPWVPAMGFTLAPSMGCFVGSR	M	R	FALSE	FALSE	F	23	1	23	2, 3, 4	4	0	16M(15.9949), 18C(57.0215), 8M(15.9949)	P30536	P30536	2B	19	sp|P30536-1|ENSG00000100300.17|TSPO|ENST00000337554.7|194007-HCT-15_RARE_RNA-L17M-and-194007-HCT-15_RARE_EXOME-L17M|17m|	TSPO_p.L17M	17	HCT-15	IA	TRUE	FALSE	TRUE	TRUE
APSPLYSVEFSEEPFGVIVHR	R	R	FALSE	FALSE	Q	21	17	37	3	3	0	NA	P10253	P10253	2B		sp|P10253|ENSG00000171298.12|GAA|ENST00000390015.7|161319-HCT-15_SNP_RNA-R223H-and-161319-HCT-15_SNP_EXOME-R223H|223h|	GAA_p.R223H	223	HCT-15	IA	FALSE	TRUE	TRUE	TRUE
APSQHLSSFDPCFYR	R	R	FALSE	FALSE	D	15	8	22	3	1	0	12C(57.0215)	Q9Y2A9	Q9Y2A9	2B	335	sp|Q9Y2A9|ENSG00000179913.10|B3GNT3|ENST00000318683.6|174500-HCT-15_SNP_RNA-R328H-and-174500-HCT-15_SNP_EXOME-R328H|328h|	B3GNT3_p.R328H	328	HCT-15	IA	FALSE	TRUE	TRUE	TRUE
AQAALQAVNSVQSGNLALAASAVAVDAGMAMAGQSPVLR	R	R	FALSE	FALSE	L	39	12	50	3	7	0	29M(15.9949), 31M(15.9949)	P26599	P26599	2B		sp|P26599-1|ENSG00000011304.19|PTBP1|ENST00000349038.8|172261-HCT-15_RARE_RNA-A169V-and-172261-HCT-15_RARE_EXOME-A169V|169v|	PTBP1_p.A169V	169	HCT-15	IA	TRUE	FALSE	TRUE	TRUE
AQASEILLEELQQGLSQTKR	R	R	FALSE	FALSE	D	20	19	38	3	2	0	NA	Q15276	Q15276	2B		sp|Q15276-1|ENSG00000029725.16|RABEP1|ENST00000537505.5|156054-HCT-15_RARE_RNA-A620T-and-156054-HCT-15_RARE_EXOME-A620T|620t|	RABEP1_p.A620T	620	HCT-15	IA	TRUE	FALSE	TRUE	TRUE
AQEALDAVSTLEEGHTQYLTSLADASALVAALTR	R	R	FALSE	FALSE	F	34	14	47	3	3	0	NA	O75146	O75146	2B		sp|O75146-1|ENSG00000130787.13|HIP1R|ENST00000253083.8|120763-HCT-15_SNP_RNA-A676T-and-120763-HCT-15_SNP_EXOME-A676T|676t|	HIP1R_p.A676T	676	HCT-15	IA	FALSE	TRUE	TRUE	TRUE
AQEALLQLSQALSLMETVK	R	K	FALSE	FALSE	Q	19	1	19	2	15	0	15M(15.9949)	O60664	O60664	2B		sp|O60664-1|ENSG00000105355.8|PLIN3|ENST00000221957.8|179418-HCT-15_SNP_RNA-V275A-and-179418-HCT-15_SNP_EXOME-V275A|275a|	PLIN3_p.V275A	275	HCT-15	IA	FALSE	TRUE	TRUE	TRUE
AQEALLQLSQALSLMETVKQGVDQK	R	K	FALSE	FALSE	L	25	1	25	3	1	0	NA	O60664	O60664	2B		sp|O60664-1|ENSG00000105355.8|PLIN3|ENST00000221957.8|179418-HCT-15_SNP_RNA-V275A-and-179418-HCT-15_SNP_EXOME-V275A|275a|	PLIN3_p.V275A	275	HCT-15	IA	FALSE	TRUE	TRUE	TRUE
ASGPDGECDSNGPGFYLYDLGSTR	R	R	FALSE	FALSE	G	24	1	24	2	1	0	8C(57.0215)	Q9BWU0	Q9BWU0	2B	224	sp|Q9BWU0|ENSG00000163798.13|SLC4A1AP|ENST00000613058.4|18795-HCT-15_RARE_RNA-H240R-and-18795-HCT-15_RARE_EXOME-H240R|240r|	SLC4A1AP_p.H240R	240	HCT-15	IA	TRUE	FALSE	TRUE	TRUE
ASLGSLEGEAEAETSSPK	K	K	FALSE	FALSE	G	18	1	18	2	4	0	NA	Q09666	Q09666	2B		sp|Q09666-1|ENSG00000124942.13|AHNAK|ENST00000378024.8|112027-HCT-15_RARE_RNA-A5761T-and-112027-HCT-15_RARE_EXOME-A5761T|5761t|	AHNAK_p.A5761T	5761	HCT-15	IA	TRUE	FALSE	TRUE	TRUE
ASSSILINESEPITNIQIR	K	R	FALSE	FALSE	L	19	1	19	2	3	0	NA	Q9UNZ2	Q9UNZ2	2B		sp|Q9UNZ2-1|ENSG00000088833.17|NSFL1C|ENST00000216879.8|187508-HCT-15_SNP_RNA-D290N-and-187508-HCT-15_SNP_EXOME-D290N,187508-HCT-15_RARE_RNA-T295I-and-187508-HCT-15_RARE_EXOME-T295I|290n295i|	NSFL1C_p.D290N,T295I	290295	HCT-15	IA	TRUE	TRUE	TRUE	TRUE
AVATSPSLEAPAALHVFPEVTLGSSLEEAPSPVR	K	R	FALSE	FALSE	D	34	1	34	3	1	0	NA	O60269	O60269	2B		sp|O60269|ENSG00000204175.5|GPRIN2|ENST00000374317.1|100560-HCT-15_SNP_RNA-V375A-and-100560-HCT-15_SNP_EXOME-V375A|375a|	GPRIN2_p.V375A	375	HCT-15	IA	FALSE	TRUE	TRUE	TRUE
AVEVATVVIQPTVLR	K	R	FALSE	FALSE	A	15	22	36	2	1	0	NA	Q9P2B2	Q9P2B2	2B		sp|Q9P2B2|ENSG00000134247.9|PTGFRN|ENST00000393203.2|5014-HCT-15_SNP_EXOME-S277T|277t|	PTGFRN_p.S277T	277	HCT-15	IA	FALSE	TRUE	FALSE	TRUE
AVGRLEAVSHTSDMHSGYADSPSK	R	K	FALSE	FALSE	A	24	1	24	4, 5	7	0	NA	Q01518	Q01518	2B		sp|Q01518-1|ENSG00000131236.16|CAP1|ENST00000372797.7|2315-HCT-15_RARE_RNA-R29S-and-2315-HCT-15_RARE_EXOME-R29S|29s|	CAP1_p.R29S	29	HCT-15	IA	TRUE	FALSE	TRUE	TRUE
AVLPLLDTQQPCYLLYR	R	R	FALSE	FALSE	L	17	10	26	2	3	0	12C(57.0215)	Q6IBS0	Q6IBS0	2B	67	sp|Q6IBS0|ENSG00000247596.8|TWF2|ENST00000305533.9|41283-HCT-15_RARE_RNA-A63T-and-41283-HCT-15_RARE_EXOME-A63T|63t|	TWF2_p.A63T	63	HCT-15	IA	TRUE	FALSE	TRUE	TRUE
AVNSVQSGNLALAASAVAVDAGMAMAGQSPVLR	Q	R	FALSE	FALSE	L	33	18	50	2	1	0	NA	P26599	P26599	2B		sp|P26599-1|ENSG00000011304.19|PTBP1|ENST00000349038.8|172261-HCT-15_RARE_RNA-A169V-and-172261-HCT-15_RARE_EXOME-A169V|169v|	PTBP1_p.A169V	169	HCT-15	IA	TRUE	FALSE	TRUE	TRUE
AVSMLEADHMPPSR	R	R	FALSE	FALSE	L	14	22	35	3	4	0	10M(15.9949)	Q99959	Q99959	2B		sp|Q99959-1|ENSG00000057294.14|PKP2|ENST00000070846.10|122833-HCT-15_SNP_RNA-L366P-and-122833-HCT-15_SNP_EXOME-L366P|366p|	PKP2_p.L366P	366	HCT-15	IA	FALSE	TRUE	TRUE	TRUE
AVTFSPELGPVPHEGLGEYNR	K	R	FALSE	FALSE	A	21	1	21	3	1	0	NA	Q9P1Y5	Q9P1Y5	2B		sp|Q9P1Y5-1|ENSG00000076826.9|CAMSAP3|ENST00000160298.8|173089-HCT-15_SNP_RNA-D687E-and-173089-HCT-15_SNP_EXOME-D687E|687e|	CAMSAP3_p.D687E	687	HCT-15	IA	FALSE	TRUE	TRUE	TRUE
AYNYIAQEVDDYHAFQTLTHIYNK	R	K	FALSE	FALSE	V	24	28	51	4	2	0	NA	Q9NYU2	Q9NYU2	2B		sp|Q9NYU2-1|ENSG00000136731.12|UGGT1|ENST00000259253.10|21872-HCT-15_SNP_RNA-V558I-and-21872-HCT-15_SNP_EXOME-V558I|558i|	UGGT1_p.V558I	558	HCT-15	IA	FALSE	TRUE	TRUE	TRUE
CFVALDFEQEMATVASSSSLEKSYELPDGQVITIGNER	L	R	FALSE	FALSE	F	38	1	38	3	2	0	NA	A5A3E0	A5A3E0	2B	917	sp|A5A3E0|ENSG00000196604.12|POTEF|ENST00000409914.6|29568-HCT-15_RARE_EXOME-Y918F|918f|	POTEF_p.Y918F	918	HCT-15	IA	TRUE	FALSE	FALSE	TRUE
CPEALFQPCFLGMESCDIHETTFNSIMK	R	K	FALSE	FALSE	S	28	1	28	3	2	0	13M(15.9949), 1C(57.0215), 9C(57.0215)	A5A3E0	A5A3E0	2B	957965972	sp|A5A3E0|ENSG00000196604.12|POTEF|ENST00000409914.6|29568-HCT-15_RARE_EXOME-G973D|973d|;sp|Q6S8J3-1|ENSG00000188219.14|POTEE|ENST00000356920.9|22005-HCT-15_RARE_EXOME-G973D|973d|	POTEF_p.G973D;POTEE_p.G973D	973	HCT-15	IA	TRUE	FALSE	FALSE	TRUE
DATGLECKPQPLHK	K	K	FALSE	FALSE	T	14	1	14	2, 3	7	0	7C(57.0215)	Q9BXP5	Q9BXP5	2B	412	sp|Q9BXP5-1|ENSG00000087087.19|SRRT|ENST00000611405.4|74711-HCT-15_RARE_RNA-R415Q-and-74711-HCT-15_RARE_EXOME-R415Q,74711-HCT-15_RARE_RNA-A408T-and-74711-HCT-15_RARE_EXOME-A408T|408t415q|	SRRT_p.R415Q,A408T	415408	HCT-15	IA	TRUE	FALSE	TRUE	TRUE
DCFIIYQGHHGDVGAPISDVILPGAAYTEK	K	K	FALSE	FALSE	S	30	1	30	3	1	0	2C(57.0215)	P28331	P28331	2B	564	sp|P28331-1|ENSG00000023228.13|NDUFS1|ENST00000449699.5|31574-HCT-15_RARE_RNA-A580S-and-31574-HCT-15_RARE_EXOME-A580S|580s|	NDUFS1_p.A580S	580	HCT-15	IA	TRUE	FALSE	TRUE	TRUE
DCGEAAAQWITSFLK	R	K	FALSE	FALSE	S	15	12	26	2	2	0	2C(57.0215)	Q5VT66	Q5VT66	2B	161	sp|Q5VT66-1|ENSG00000186205.12|MARC1|ENST00000366910.9|8430-HCT-15_SNP_RNA-T165A-and-8430-HCT-15_SNP_EXOME-T165A|165a|	MARC1_p.T165A	165	HCT-15	IA	FALSE	TRUE	TRUE	TRUE
DDHDPVDKIALQK	F	K	FALSE	FALSE	Y	13	12	24	3	6	0	NA	P22626	P22626	2B		sp|P22626-1|ENSG00000122566.20|HNRNPA2B1|ENST00000354667.8|77381-HCT-15_RARE_EXOME-V170A|170a|	HNRNPA2B1_p.V170A	170	HCT-15	IA	TRUE	FALSE	FALSE	TRUE
DEPLHALYDNVEK	R	K	FALSE	FALSE	L	13	8	20	2, 3	8	0	NA	P08243	P08243	2B		sp|P08243-1|ENSG00000070669.16|ASNS|ENST00000175506.8|79376-HCT-15_SNP_RNA-V210E-and-79376-HCT-15_SNP_EXOME-V210E|210e|	ASNS_p.V210E	210	HCT-15	IA	FALSE	TRUE	TRUE	TRUE
DFVSEQLTSLLVNEVQLPALGENKK	K	K	FALSE	FALSE	V	25	18	42	3	3	0	NA	P54136	P54136	2B		sp|P54136-1|ENSG00000113643.8|RARS|ENST00000231572.7|57480-HCT-15_RARE_RNA-G182E-and-57480-HCT-15_RARE_EXOME-G182E|182e|	RARS_p.G182E	182	HCT-15	IA	TRUE	FALSE	TRUE	TRUE
DGEDQTQDTELVETMPAGDGTFQK	R	K	FALSE	FALSE	W	24	1	24	2	2	0	NA	P10321	P10321	2B		sp|P10321|ENSG00000204525.16|HLA-C|ENST00000376228.9|68111-HCT-15_SNP_RNA-R258M-and-68111-HCT-15_SNP_EXOME-R258M|258m|	HLA-C_p.R258M	258	HCT-15	IA	FALSE	TRUE	TRUE	TRUE
DLDEDANGITDDGKEINEK	K	K	FALSE	FALSE	S	19	7	25	3	1	0	NA	Q5QJE6	Q5QJE6	2B		sp|Q5QJE6|ENSG00000067334.13|DNTTIP2|ENST00000436063.6|13338-HCT-15_SNP_RNA-E309D-and-13338-HCT-15_SNP_EXOME-E309D|309d|	DNTTIP2_p.E309D	309	HCT-15	IA	FALSE	TRUE	TRUE	TRUE
DMAGAQAAAVALNEEFLK	R	K	FALSE	FALSE	N	18	9	26	2	8	0	2M(15.9949)	Q14126	Q14126	2B		sp|Q14126|ENSG00000046604.12|DSG2|ENST00000261590.12|169179-HCT-15_SNP_RNA-R773K-and-169179-HCT-15_SNP_EXOME-R773K|773k|	DSG2_p.R773K	773	HCT-15	IA	FALSE	TRUE	TRUE	TRUE
DMELPIEK	K	K	FALSE	FALSE	E	8	17	24	2	1	0	NA	P27816	P27816	2B		sp|P27816-1|ENSG00000047849.21|MAP4|ENST00000360240.10|40535-HCT-15_SNP_RNA-T310I-and-40535-HCT-15_SNP_EXOME-T310I|310i|	MAP4_p.T310I	310	HCT-15	IA	FALSE	TRUE	TRUE	TRUE
DNAGDWADFWR	R	R	FALSE	FALSE	M	11	1	11	2	2	0	NA	Q9UDY2	Q9UDY2	2B		sp|Q9UDY2-1|ENSG00000119139.18|TJP2|ENST00000377245.8|90437-HCT-15_RARE_RNA-R682W-and-90437-HCT-15_RARE_EXOME-R682W|682w|	TJP2_p.R682W	682	HCT-15	IA	TRUE	FALSE	TRUE	TRUE
DREAAEGLGSHER	K	R	FALSE	FALSE	A	13	3	15	3	2	0	NA	P17655	P17655	2B		sp|P17655-1|ENSG00000162909.17|CAPN2|ENST00000295006.5|8501-HCT-15_SNP_RNA-D22E-and-8501-HCT-15_SNP_EXOME-D22E|22e|	CAPN2_p.D22E	22	HCT-15	IA	FALSE	TRUE	TRUE	TRUE
DSRPSQAAGDNQGDEVKEQTFSGGTSQDTK	K	K	FALSE	FALSE	A	30	3	32	3	2	0	NA	Q9Y2W1	Q9Y2W1	2B		sp|Q9Y2W1|ENSG00000054118.13|THRAP3|ENST00000354618.9|2173-HCT-15_SNP_RNA-A201V-and-2173-HCT-15_SNP_EXOME-A201V|201v|	THRAP3_p.A201V	201	HCT-15	IA	FALSE	TRUE	TRUE	TRUE
DSSCVLQAMLATQLR	R	R	FALSE	FALSE	S	15	1	15	2	1	0	4C(57.0215)	P35052	P35052	2B	94	sp|P35052-1|ENSG00000063660.8|GPC1|ENST00000264039.6|25385-HCT-15_RARE_RNA-R94C-and-25385-HCT-15_RARE_EXOME-R94C|94c|	GPC1_p.R94C	94	HCT-15	IA	TRUE	FALSE	TRUE	TRUE
DVGEWQHEEFYR	K	R	FALSE	FALSE	Y	12	17	28	2, 3	13	0	NA	Q12931	Q12931	2B		sp|Q12931-1|ENSG00000126602.10|TRAP1|ENST00000246957.9|151786-HCT-15_SNP_RNA-R307G-and-151786-HCT-15_SNP_EXOME-R307G|307g|	TRAP1_p.R307G	307	HCT-15	IA	FALSE	TRUE	TRUE	TRUE
EAAGEGPALYEDPPDHK	K	K	FALSE	FALSE	T	17	7	23	3	2	0	NA	P27695	P27695	2B		sp|P27695|ENSG00000100823.11|APEX1|ENST00000555414.5|130585-HCT-15_SNP_RNA-Q51H-and-130585-HCT-15_SNP_EXOME-Q51H|51h|	APEX1_p.Q51H	51	HCT-15	IA	FALSE	TRUE	TRUE	TRUE
EAGFPPGVVNIITGYGPTAGAAIAQHMDVDK	K	K	FALSE	FALSE	V	31	20	50	3	3	0	NA	P30837	P30837	2B		sp|P30837|ENSG00000137124.7|ALDH1B1|ENST00000377698.3|90100-HCT-15_SNP_RNA-V253M-and-90100-HCT-15_SNP_EXOME-V253M|253m|	ALDH1B1_p.V253M	253	HCT-15	IA	FALSE	TRUE	TRUE	TRUE
EAGFPPGVVNIITGYGPTAGAAIAQHMDVDKVAFTGSTEVGHLIQK	K	K	FALSE	FALSE	A	46	20	65	4, 5	3	0	27M(15.9949)	P30837	P30837	2B		sp|P30837|ENSG00000137124.7|ALDH1B1|ENST00000377698.3|90100-HCT-15_SNP_RNA-V253M-and-90100-HCT-15_SNP_EXOME-V253M|253m|	ALDH1B1_p.V253M	253	HCT-15	IA	FALSE	TRUE	TRUE	TRUE
EAGGNYTPALTDQEVYAQVAR	K	R	FALSE	FALSE	L	21	6	26	2	3	0	NA	Q96ST3	Q96ST3	2B		sp|Q96ST3|ENSG00000169375.15|SIN3A|ENST00000394947.7|144428-HCT-15_RARE_RNA-E355D-and-144428-HCT-15_RARE_EXOME-E355D|355d|	SIN3A_p.E355D	355	HCT-15	IA	TRUE	FALSE	TRUE	TRUE
EALDVLDAVLK	R	K	FALSE	FALSE	A	11	6	16	2	1	0	NA	Q92552	Q92552	2B		sp|Q92552-1|ENSG00000113048.16|MRPS27|ENST00000261413.9|59502-HCT-15_SNP_RNA-G284D-and-59502-HCT-15_SNP_EXOME-G284D|284d|	MRPS27_p.G284D	284	HCT-15	IA	FALSE	TRUE	TRUE	TRUE
EALFQPCFLGMESCDIHETTFNSIMK	P	K	FALSE	FALSE	S	26	1	26	2	3	0	11M(15.9949), 14C(57.0215), 7C(57.0215)	A5A3E0	A5A3E0	2B	965972	sp|A5A3E0|ENSG00000196604.12|POTEF|ENST00000409914.6|29568-HCT-15_RARE_EXOME-G973D|973d|;sp|Q6S8J3-1|ENSG00000188219.14|POTEE|ENST00000356920.9|22005-HCT-15_RARE_EXOME-G973D|973d|	POTEF_p.G973D;POTEE_p.G973D	973	HCT-15	IA	TRUE	FALSE	FALSE	TRUE
EALPMDTEVYESPYTDPEEIRPK	R	K	FALSE	FALSE	E	23	7	29	3	2	0	NA	P43405	P43405	2B		sp|P43405-1|ENSG00000165025.14|SYK|ENST00000375754.8|90837-HCT-15_RARE_RNA-A353T-and-90837-HCT-15_RARE_EXOME-A353T|353t|	SYK_p.A353T	353	HCT-15	IA	TRUE	FALSE	TRUE	TRUE
EAPAGPLEEDDLEPLTLAPTPAPRPPQDLIGLR	K	R	FALSE	FALSE	L	33	9	41	3	4	0	NA	Q92797	Q92797	2B		sp|Q92797-1|ENSG00000125755.18|SYMPK|ENST00000245934.11|183215-HCT-15_RARE_RNA-A1129T-and-183215-HCT-15_RARE_EXOME-A1129T|1129t|	SYMPK_p.A1129T	1129	HCT-15	IA	TRUE	FALSE	TRUE	TRUE
EDQTLALLSQFK	R	K	FALSE	FALSE	S	12	1	12	2	2	0	NA	Q6UX04	Q6UX04	2B		sp|Q6UX04-1|ENSG00000153015.15|CWC27|ENST00000381070.7|54388-HCT-15_RARE_RNA-N390S-and-54388-HCT-15_RARE_EXOME-N390S|390s|	CWC27_p.N390S	390	HCT-15	IA	TRUE	FALSE	TRUE	TRUE
EFAGSLGIPFLETSAK	K	K	FALSE	FALSE	N	16	12	27	2	10	0	NA	Q9H0U4	Q9H0U4	2B		sp|Q9H0U4|ENSG00000174903.15|RAB1B|ENST00000311481.10|106330-HCT-15_RARE_RNA-D141G-and-106330-HCT-15_RARE_EXOME-D141G|141g|	RAB1B_p.D141G	141	HCT-15	IA	TRUE	FALSE	TRUE	TRUE
EFSPFGTITSANVMMEGGR	K	R	FALSE	FALSE	S	19	1	19	2	8	0	14M(15.9949), 15M(15.9949)	Q9H361	Q9H361	2B		sp|Q9H361|ENSG00000151846.8|PABPC3|ENST00000281589.4|127260-HCT-15_RARE_RNA-K324N,127260-HCT-15_RARE_RNA-A313E|313e324n|;sp|P11940-1|ENSG00000070756.15|PABPC1|ENST00000318607.9|87770-HCT-15_RARE_EXOME-K324N|324n|	PABPC3_p.K324N,A313E;PABPC1_p.K324N	324,313;324	HCT-15	IA	TRUE	FALSE	TRUE	TRUE
EHILPSLAHLLPALDCLEGSTTGL	K	L	FALSE	FALSE	-	24	1	24	3	1	0	16C(57.0215)	Q9BSH5	Q9BSH5	2B	243	sp|Q9BSH5|ENSG00000119431.9|HDHD3|ENST00000238379.9|94947-HCT-15_RARE_RNA-P249T-and-94947-HCT-15_RARE_EXOME-P249T|249t|	HDHD3_p.P249T	249	HCT-15	IA	TRUE	FALSE	TRUE	TRUE
EKLCFVALDFDQEMATVASSSSLEK	K	K	FALSE	FALSE	S	25	1	25	3	1	0	4C(57.0215)	P0CG39	P0CG39	2B	880	sp|P0CG39|ENSG00000222038.3|POTEJ|ENST00000409602.1|21958-HCT-15_RARE_EXOME-E887D,21958-HCT-15_SNP_EXOME-Y881F,21958-HCT-15_SNP_EXOME-M892T|881f887d892t|	POTEJ_p.E887D,Y881F,M892T	887881892	HCT-15	IA	TRUE	TRUE	FALSE	TRUE
EKLCFVALDFEQEMAMAASSSSLEK	K	K	FALSE	FALSE	S	25	1	25	2	9	0	NA	P0CG38	P0CG38	2B	917	sp|P0CG38|ENSG00000196834.11|POTEI|ENST00000451531.6|29623-HCT-15_SNP_EXOME-Y918F|918f|	POTEI_p.Y918F	918	HCT-15	IA	FALSE	TRUE	FALSE	TRUE
EKLCFVALDFEQEMATAASSSSLEK	K	K	FALSE	FALSE	S	25	1	25	2	9	0	4C(57.0215)	P0CG38	P0CG38	2B	917	sp|A5A3E0|ENSG00000196604.12|POTEF|ENST00000409914.6|29568-HCT-15_RARE_EXOME-V930A,29568-HCT-15_RARE_EXOME-Y918F|918f930a|;sp|P0CG38|ENSG00000196834.11|POTEI|ENST00000451531.6|29623-HCT-15_SNP_EXOME-M929T,29623-HCT-15_SNP_EXOME-Y918F|918f929t|	POTEF_p.V930A,Y918F;POTEI_p.M929T,Y918F	930,918;929,918	HCT-15	IA	TRUE	TRUE	FALSE	TRUE
ELDECFAQANDQMETLDSLIR	R	R	FALSE	FALSE	E	21	1	21	2	1	0	5C(57.0215)	P15924	P15924	2B	110	sp|P15924-1|ENSG00000096696.13|DSP|ENST00000379802.7|62914-HCT-15_RARE_RNA-I120T-and-62914-HCT-15_RARE_EXOME-I120T|120t|	DSP_p.I120T	120	HCT-15	IA	TRUE	FALSE	TRUE	TRUE
ELSGLPSGPSAGSGPPPPPPGPPPPPVSTSSGSDESASR	K	R	FALSE	FALSE	S	39	1	39	3	4	0	NA	Q01518	Q01518	2B		sp|Q01518-1|ENSG00000131236.16|CAP1|ENST00000372797.7|2315-HCT-15_RARE_RNA-C229G-and-2315-HCT-15_RARE_EXOME-C229G,2315-HCT-15_RARE_RNA-C236G-and-2315-HCT-15_RARE_EXOME-C236G,2315-HCT-15_RARE_EXOME-I245S,2315-HCT-15_RARE_EXOME-C247G,2315-HCT-15_RARE_EXOME-Y249D|229g236g245s247g249d|	CAP1_p.C229G,C236G,I245S,C247G,Y249D	229236245247249	HCT-15	IA	TRUE	FALSE	TRUE	TRUE
EMILIPEGDVNSAK	R	K	FALSE	FALSE	V	14	1	14	2	2	0	NA	Q9NTZ6	Q9NTZ6	2B		sp|Q9NTZ6|ENSG00000244462.7|RBM12|ENST00000374114.7|188470-HCT-15_RARE_RNA-N534I-and-188470-HCT-15_RARE_EXOME-N534I|534i|	RBM12_p.N534I	534	HCT-15	IA	TRUE	FALSE	TRUE	TRUE
EPWLLPSQHNDIIQDALGQR	R	R	FALSE	FALSE	Y	20	13	32	3	4	0	NA	Q14697	Q14697	2B		sp|Q14697-1|ENSG00000089597.16|GANAB|ENST00000356638.7|112080-HCT-15_SNP_RNA-R698Q-and-112080-HCT-15_SNP_EXOME-R698Q|698q|	GANAB_p.R698Q	698	HCT-15	IA	FALSE	TRUE	TRUE	TRUE
EPWVEQEGPEYWDRETQK	R	K	FALSE	FALSE	Y	18	1	18	3	1	0	NA	P10321	P10321	2B		sp|P10321|ENSG00000204525.16|HLA-C|ENST00000376228.9|68111-HCT-15_SNP_RNA-A73E-and-68111-HCT-15_SNP_EXOME-A73E|73e|	HLA-C_p.A73E	73	HCT-15	IA	FALSE	TRUE	TRUE	TRUE
EQDLQLEELRQPVSTLK	R	K	FALSE	FALSE	C	17	3	19	3	5	0	NA	O60763	O60763	2B		sp|O60763-1|ENSG00000138768.14|USO1|ENST00000514213.6|47074-HCT-15_RARE_RNA-Q672P-and-47074-HCT-15_RARE_EXOME-Q672P|672p|	USO1_p.Q672P	672	HCT-15	IA	TRUE	FALSE	TRUE	TRUE
EQLQQEQALLEEIER	R	R	FALSE	FALSE	H	15	1	15	2	3	0	NA	Q15149	Q15149	2B		sp|Q15149-1|ENSG00000178209.14|PLEC|ENST00000322810.8|89058-HCT-15_SNP_RNA-R1386Q-and-89058-HCT-15_SNP_EXOME-R1386Q|1386q|	PLEC_p.R1386Q	1386	HCT-15	IA	FALSE	TRUE	TRUE	TRUE
ESFADILPEAAALVKDPSVSK	R	K	FALSE	FALSE	S	21	1	21	3	1	0	NA	Q5VT52	Q5VT52	2B		sp|Q5VT52-1|ENSG00000163125.15|RPRD2|ENST00000369068.4|5515-HCT-15_SNP_RNA-V103I-and-5515-HCT-15_SNP_EXOME-V103I|103i|	RPRD2_p.V103I	103	HCT-15	IA	FALSE	TRUE	TRUE	TRUE
ETFLDPFILR	K	R	FALSE	FALSE	D	10	1	10	2	1	0	NA	P23470	P23470	2B		sp|P23470-1|ENSG00000144724.19|PTPRG|ENST00000474889.5|35379-HCT-15_SNP_RNA-V237I-and-35379-HCT-15_SNP_EXOME-V237I|237i|	PTPRG_p.V237I	237	HCT-15	IA	FALSE	TRUE	TRUE	TRUE
FAEAFEDIPR	K	R	FALSE	FALSE	A	10	22	31	2	12	0	NA	P50990	P50990	2B		sp|P50990-1|ENSG00000156261.12|CCT8|ENST00000286788.8|191141-HCT-15_RARE_RNA-A447D-and-191141-HCT-15_RARE_EXOME-A447D|447d|	CCT8_p.A447D	447	HCT-15	IA	TRUE	FALSE	TRUE	TRUE
FAGGDYTTTIESFISASGR	K	R	FALSE	FALSE	A	19	1	19	2	1	0	NA	P07814	P07814	2B		sp|P07814|ENSG00000136628.17|EPRS|ENST00000366923.7|17120-HCT-15_RARE_RNA-A1227S-and-17120-HCT-15_RARE_EXOME-A1227S|1227s|	EPRS_p.A1227S	1227	HCT-15	IA	TRUE	FALSE	TRUE	TRUE
FASEIAGVDELGTTGR	R	R	FALSE	FALSE	G	16	6	21	2	1	0	NA	P28331	P28331	2B		sp|P28331-1|ENSG00000023228.13|NDUFS1|ENST00000449699.5|31574-HCT-15_RARE_RNA-D194E-and-31574-HCT-15_RARE_EXOME-D194E|194e|	NDUFS1_p.D194E	194	HCT-15	IA	TRUE	FALSE	TRUE	TRUE
FFDANYDGKDYDHVAAR	K	R	FALSE	FALSE	Q	17	1	17	3, 4	2	0	NA	Q15691	Q15691	2B		sp|Q15691|ENSG00000101367.8|MAPRE1|ENST00000375571.5|185898-HCT-15_RARE_RNA-P126H-and-185898-HCT-15_RARE_EXOME-P126H|126h|	MAPRE1_p.P126H	126	HCT-15	IA	TRUE	FALSE	TRUE	TRUE
FFGSLPDSWAR	K	R	FALSE	FALSE	G	11	11	21	2	2	0	NA	Q9BUP3	Q9BUP3	2B		sp|Q9BUP3-1|ENSG00000109854.13|HTATIP2|ENST00000421577.6|104095-HCT-15_SNP_RNA-S197R-and-104095-HCT-15_SNP_EXOME-S197R|197r|	HTATIP2_p.S197R	197	HCT-15	IA	FALSE	TRUE	TRUE	TRUE
FFTGQITATGK	R	K	FALSE	FALSE	V	11	1	11	2	2	0	NA	Q13423	Q13423	2B		sp|Q13423|ENSG00000112992.16|NNT|ENST00000264663.9|54109-HCT-15_RARE_RNA-A222T-and-54109-HCT-15_RARE_EXOME-A222T|222t|	NNT_p.A222T	222	HCT-15	IA	TRUE	FALSE	TRUE	TRUE
FGGGNPELLTHMVSK	R	K	FALSE	FALSE	G	15	8	22	2, 3	7	0	12M(15.9949)	P40939	P40939	2B		sp|P40939-1|ENSG00000084754.11|HADHA|ENST00000380649.7|26387-HCT-15_RARE_RNA-Q621H-and-26387-HCT-15_RARE_EXOME-Q621H|621h|	HADHA_p.Q621H	621	HCT-15	IA	TRUE	FALSE	TRUE	TRUE
FGYYGDALR	R	R	FALSE	FALSE	Q	9	1	9	2	1	0	NA	P07942	P07942	2B		sp|P07942|ENSG00000091136.13|LAMB1|ENST00000222399.10|80038-HCT-15_SNP_RNA-Q1022R-and-80038-HCT-15_SNP_EXOME-Q1022R|1022r|	LAMB1_p.Q1022R	1022	HCT-15	IA	FALSE	TRUE	TRUE	TRUE
FIAPAASLGFR	R	R	FALSE	FALSE	F	11	16	26	2	1	0	NA	P53370	P53370	2B		sp|P53370-1|ENSG00000170917.13|NUDT6|ENST00000304430.9|52086-HCT-15_SNP_RNA-C114R-and-52086-HCT-15_SNP_EXOME-C114R|114r|	NUDT6_p.C114R	114	HCT-15	IA	FALSE	TRUE	TRUE	TRUE
FIIHVPPGEFNEVFNDVR	K	R	FALSE	FALSE	L	18	7	24	2, 3	9	0	NA	P47755	P47755	2B		sp|P47755-1|ENSG00000198898.13|CAPZA2|ENST00000361183.7|75174-HCT-15_RARE_RNA-A24V-and-75174-HCT-15_RARE_EXOME-A24V|24v|	CAPZA2_p.A24V	24	HCT-15	IA	TRUE	FALSE	TRUE	TRUE
FIQENVFVAANHNASPLSIK	R	K	FALSE	FALSE	E	20	6	25	3	5	0	NA	P11172	P11172	2B		sp|P11172-1|ENSG00000114491.13|UMPS|ENST00000232607.6|36507-HCT-15_SNP_RNA-G213A-and-36507-HCT-15_SNP_EXOME-G213A|213a|	UMPS_p.G213A	213	HCT-15	IA	FALSE	TRUE	TRUE	TRUE
FLSSSPHLPPSSYFNANGR	K	R	FALSE	FALSE	A	19	13	31	3	5	0	NA	O14773	O14773	2B		sp|O14773-1|ENSG00000166340.16|TPP1|ENST00000299427.11|109975-HCT-15_RARE_RNA-S445N-and-109975-HCT-15_RARE_EXOME-S445N|445n|	TPP1_p.S445N	445	HCT-15	IA	TRUE	FALSE	TRUE	TRUE
FNHNLLPSETAHKPDLFSK	K	K	FALSE	FALSE	T	19	1	19	4, 5	3	0	NA	Q07157	Q07157	2B		sp|Q07157-1|ENSG00000104067.16|TJP1|ENST00000346128.10|142049-HCT-15_RARE_RNA-S1564F-and-142049-HCT-15_RARE_EXOME-S1564F|1564f|	TJP1_p.S1564F	1564	HCT-15	IA	TRUE	FALSE	TRUE	TRUE
FNLSQESSYIATQYSLRPR	K	R	FALSE	FALSE	R	19	8	26	3	2	0	NA	Q14739	Q14739	2B		sp|Q14739|ENSG00000143815.14|LBR|ENST00000272163.8|17298-HCT-15_SNP_RNA-S154N-and-17298-HCT-15_SNP_EXOME-S154N|154n|	LBR_p.S154N	154	HCT-15	IA	FALSE	TRUE	TRUE	TRUE
FSKEEPISSGPEEAVGK	K	K	FALSE	FALSE	S	17	1	17	3	1	0	NA	O00567	O00567	2B		sp|O00567|ENSG00000101361.16|NOP56|ENST00000329276.9|185156-HCT-15_RARE_RNA-V568I-and-185156-HCT-15_RARE_EXOME-V568I|568i|	NOP56_p.V568I	568	HCT-15	IA	TRUE	FALSE	TRUE	TRUE
FSVPVQHFCGGNPSTPIQVR	R	R	FALSE	FALSE	C	20	1	20	3	4	0	9C(57.0215)	Q99829	Q99829	2B	200	sp|Q99829|ENSG00000214078.12|CPNE1|ENST00000352393.8|188439-HCT-15_SNP_EXOME-Q211R|211r|	CPNE1_p.Q211R	211	HCT-15	IA	FALSE	TRUE	FALSE	TRUE
FTTLEGMLK	K	K	FALSE	FALSE	D	9	26	34	2	2	0	NA	O75312	O75312	2B		sp|O75312|ENSG00000109917.10|ZPR1|ENST00000227322.7|114665-HCT-15_RARE_RNA-L357M-and-114665-HCT-15_RARE_EXOME-L357M|357m|	ZPR1_p.L357M	357	HCT-15	IA	TRUE	FALSE	TRUE	TRUE
FWRPEEPIEVIRPDIAALVR	K	R	FALSE	FALSE	Q	20	14	33	4	2	0	NA	Q8TED1	Q8TED1	2B		sp|Q8TED1|ENSG00000164294.13|GPX8|ENST00000503787.5|54220-HCT-15_SNP_RNA-K182R-and-54220-HCT-15_SNP_EXOME-K182R|182r|	GPX8_p.K182R	182	HCT-15	IA	FALSE	TRUE	TRUE	TRUE
GATVLPANTPCNVGSGK	R	K	FALSE	FALSE	D	17	6	22	2	3	0	11C(57.0215)	P22059	P22059	2B	334	sp|P22059|ENSG00000110048.11|OSBP|ENST00000263847.5|111772-HCT-15_RARE_RNA-G334C-and-111772-HCT-15_RARE_EXOME-G334C|334c|	OSBP_p.G334C	334	HCT-15	IA	TRUE	FALSE	TRUE	TRUE
GDEDLGDMGKDEEAQFR	R	R	FALSE	FALSE	M	17	1	17	3	1	0	NA	Q9BSW2	Q9BSW2	2B		sp|Q9BSW2-1|ENSG00000130038.9|EFCAB4B|ENST00000252322.1|121451-HCT-15_SNP_RNA-E154K-and-121451-HCT-15_SNP_EXOME-E154K|154k|	EFCAB4B_p.E154K	154	HCT-15	IA	FALSE	TRUE	TRUE	TRUE
GDYIGSTYFER	R	R	FALSE	FALSE	C	11	6	16	2	4	0	NA	P61081	P61081	2B		sp|P61081|ENSG00000130725.7|UBE2M|ENST00000253023.7|185046-HCT-15_RARE_RNA-G171D-and-185046-HCT-15_RARE_EXOME-G171D|171d|	UBE2M_p.G171D	171	HCT-15	IA	TRUE	FALSE	TRUE	TRUE
GFGFVTFDDHDPVDKIALQK	R	K	FALSE	FALSE	Y	20	5	24	3, 4	15	0	NA	P22626	P22626	2B		sp|P22626-1|ENSG00000122566.20|HNRNPA2B1|ENST00000354667.8|77381-HCT-15_RARE_EXOME-V170A|170a|	HNRNPA2B1_p.V170A	170	HCT-15	IA	TRUE	FALSE	FALSE	TRUE
GFTTAGVLAAHK	K	K	FALSE	FALSE	L	12	18	29	2, 3	5	0	NA	P32322	P32322	2B		sp|P32322-1|ENSG00000183010.16|PYCR1|ENST00000619204.4|168184-HCT-15_RARE_EXOME-A21T|21t|	PYCR1_p.A21T	21	HCT-15	IA	TRUE	FALSE	FALSE	TRUE
GISEDSHLESLQDVGQSAAPTFMISPETITGTGK	K	K	FALSE	FALSE	K	34	1	34	3	7	0	23M(15.9949)	P27816	P27816	2B		sp|P27816-1|ENSG00000047849.21|MAP4|ENST00000360240.10|40535-HCT-15_SNP_EXOME-V628I|628i|	MAP4_p.V628I	628	HCT-15	IA	FALSE	TRUE	FALSE	TRUE
GISEDSHLESLQDVGQSAAPTFMISPETITGTGKK	K	K	FALSE	FALSE	C	35	1	35	3, 4	6	0	23M(15.9949)	P27816	P27816	2B		sp|P27816-1|ENSG00000047849.21|MAP4|ENST00000360240.10|40535-HCT-15_SNP_EXOME-V628I|628i|	MAP4_p.V628I	628	HCT-15	IA	FALSE	TRUE	FALSE	TRUE
GIYEETTTGVHNLYK	R	K	FALSE	FALSE	M	15	12	26	2, 3	2	0	NA	P23526	P23526	2B		sp|P23526-1|ENSG00000101444.12|AHCY|ENST00000217426.6|188297-HCT-15_RARE_RNA-S154Y-and-188297-HCT-15_RARE_EXOME-S154Y|154y|	AHCY_p.S154Y	154	HCT-15	IA	TRUE	FALSE	TRUE	TRUE
GLLALGDYMNVQCHACIGGTNIGEDIR	K	R	FALSE	FALSE	K	27	11	37	3	1	0	13C(57.0215), 16C(57.0215)	P38919	P38919	2B	137140	sp|P38919|ENSG00000141543.9|EIF4A3|ENST00000269349.7|167882-HCT-15_RARE_RNA-V146I-and-167882-HCT-15_RARE_EXOME-V146I|146i|	EIF4A3_p.V146I	146	HCT-15	IA	TRUE	FALSE	TRUE	TRUE
GLRDEALDQVSGIPGCIFVHASGFIGGHR	R	R	FALSE	FALSE	T	29	1	29	5	1	0	16C(57.0215)	Q9HB07	Q9HB07	2B	340	sp|Q9HB07|ENSG00000139637.13|C12orf10|ENST00000267103.9|117896-HCT-15_SNP_RNA-T349I-and-117896-HCT-15_SNP_EXOME-T349I,117896-HCT-15_SNP_RNA-H353R-and-117896-HCT-15_SNP_EXOME-H353R|349i353r|	C12orf10_p.T349I,H353R	349353	HCT-15	IA	FALSE	TRUE	TRUE	TRUE
GLVEPVNMVDNGDGTHTVTYTPSQEGPYMVSVK	R	K	FALSE	FALSE	Y	33	1	33	3	7	0	8M(15.9949)	O75369	O75369	2B		sp|O75369-1|ENSG00000136068.14|FLNB|ENST00000295956.8|35308-HCT-15_SNP_RNA-V1471M-and-35308-HCT-15_SNP_EXOME-V1471M|1471m|	FLNB_p.V1471M	1471	HCT-15	IA	FALSE	TRUE	TRUE	TRUE
GNTISHIIK	R	K	FALSE	FALSE	L	9	1	9	2	1	0	NA	Q06203	Q06203	2B		sp|Q06203|ENSG00000128059.8|PPAT|ENST00000264220.6|50419-HCT-15_RARE_RNA-P400H-and-50419-HCT-15_RARE_EXOME-P400H|400h|	PPAT_p.P400H	400	HCT-15	IA	TRUE	FALSE	TRUE	TRUE
GQEEMLLLFHHLTPR	R	R	FALSE	FALSE	W	15	10	24	3	1	0	NA	Q8TF72	Q8TF72	2B		sp|Q8TF72-1|ENSG00000138771.15|SHROOM3|ENST00000296043.6|47112-HCT-15_SNP_RNA-P1290L-and-47112-HCT-15_SNP_EXOME-P1290L|1290l|	SHROOM3_p.P1290L	1290	HCT-15	IA	FALSE	TRUE	TRUE	TRUE
GSTESFGAANISQAAR	R	R	FALSE	FALSE	E	16	1	16	2	1	0	NA	Q12789	Q12789	2B		sp|Q12789-2|ENSG00000077235.17|GTF3C1|ENST00000356183.8|152903-HCT-15_SNP_EXOME-F1959S|1959s|	GTF3C1_p.F1959S	1959	HCT-15	IA	FALSE	TRUE	FALSE	TRUE
GTSPATEAAPPPPEPVPAAQGPATVQSVEDFVPDDRLDR	F	R	FALSE	FALSE	S	39	11	49	3	1	0	NA	Q3YEC7	Q3YEC7	2B		sp|Q3YEC7-1|ENSG00000196642.18|RABL6|ENST00000311502.11|92549-HCT-15_SNP_RNA-E382Q-and-92549-HCT-15_SNP_EXOME-E382Q|382q|	RABL6_p.E382Q	382	HCT-15	IA	FALSE	TRUE	TRUE	TRUE
GVVPLAGTNGETTIQGLDGLSER	K	R	FALSE	FALSE	C	23	6	28	2	12	0	NA	P04075	P04075	2B		sp|P04075-1|ENSG00000149925.18|ALDOA|ENST00000569545.5|147948-HCT-15_RARE_EXOME-T125I|125i|	ALDOA_p.T125I	125	HCT-15	IA	TRUE	FALSE	FALSE	TRUE
HASSGSFLSSANEHLK	R	K	FALSE	FALSE	E	16	7	22	3	1	0	NA	O76003	O76003	2B		sp|O76003|ENSG00000108010.11|GLRX3|ENST00000331244.9|99420-HCT-15_SNP_RNA-P123S-and-99420-HCT-15_SNP_EXOME-P123S|123s|	GLRX3_p.P123S	123	HCT-15	IA	FALSE	TRUE	TRUE	TRUE
HASSGSFLSSANEHLKEDLNLR	R	R	FALSE	FALSE	L	22	7	28	4	4	0	NA	O76003	O76003	2B		sp|O76003|ENSG00000108010.11|GLRX3|ENST00000331244.9|99420-HCT-15_SNP_RNA-P123S-and-99420-HCT-15_SNP_EXOME-P123S|123s|	GLRX3_p.P123S	123	HCT-15	IA	FALSE	TRUE	TRUE	TRUE
HFGLEGCEVLIPALK	K	K	FALSE	FALSE	T	15	1	15	3	1	0	7C(57.0215)	Q02218	Q02218	2B	283	sp|Q02218-1|ENSG00000105953.14|OGDH|ENST00000222673.5|72959-HCT-15_RARE_RNA-R277H-and-72959-HCT-15_RARE_EXOME-R277H|277h|	OGDH_p.R277H	277	HCT-15	IA	TRUE	FALSE	TRUE	TRUE
HFTAQGLPDLNHSQVYAVK	K	K	FALSE	FALSE	T	19	1	19	3	4	0	NA	Q92900	Q92900	2B		sp|Q92900-1|ENSG00000005007.12|UPF1|ENST00000599848.5|174650-HCT-15_RARE_RNA-R473H-and-174650-HCT-15_RARE_EXOME-R473H|473h|	UPF1_p.R473H	473	HCT-15	IA	TRUE	FALSE	TRUE	TRUE
HGYFDEEMNR	R	R	FALSE	FALSE	V	10	1	10	2	3	0	NA	Q15149	Q15149	2B		sp|Q15149-1|ENSG00000178209.14|PLEC|ENST00000322810.8|89058-HCT-15_SNP_RNA-R2969H-and-89058-HCT-15_SNP_EXOME-R2969H|2969h|	PLEC_p.R2969H	2969	HCT-15	IA	FALSE	TRUE	TRUE	TRUE
HTLSFVDVGTGK	K	K	FALSE	FALSE	V	12	1	12	2	2	0	NA	P31040	P31040	2B		sp|P31040-1|ENSG00000073578.16|SDHA|ENST00000264932.10|53319-HCT-15_RARE_RNA-Y629F-and-53319-HCT-15_RARE_EXOME-Y629F|629f|	SDHA_p.Y629F	629	HCT-15	IA	TRUE	FALSE	TRUE	TRUE
HVWSHHTLPITDLHCGFGGPLAR	R	R	FALSE	FALSE	V	23	8	30	4, 5	2	0	15C(57.0215)	Q9BV38	Q9BV38	2B	180	sp|Q9BV38|ENSG00000065268.10|WDR18|ENST00000585809.5|172300-HCT-15_SNP_RNA-A172T-and-172300-HCT-15_SNP_EXOME-A172T|172t|	WDR18_p.A172T	172	HCT-15	IA	FALSE	TRUE	TRUE	TRUE
IASPLEAPVFVAAPHSTFFDGIACVVAGLPSIVSR	K	R	FALSE	FALSE	N	35	5	39	3	1	0	24C(57.0215)	Q7L5N7	Q7L5N7	2B	155	sp|Q7L5N7-1|ENSG00000087253.12|LPCAT2|ENST00000262134.9|148752-HCT-15_SNP_RNA-M163I-and-148752-HCT-15_SNP_EXOME-M163I|163i|	LPCAT2_p.M163I	163	HCT-15	IA	FALSE	TRUE	TRUE	TRUE
IATSPASQLSPTELTEMR	F	R	FALSE	FALSE	N	18	1	18	2	2	0	NA	Q9NYK5	Q9NYK5	2B		sp|Q9NYK5-1|ENSG00000154719.13|MRPL39|ENST00000352957.8|191066-HCT-15_SNP_RNA-S31P-and-191066-HCT-15_SNP_EXOME-S31P|31p|	MRPL39_p.S31P	31	HCT-15	IA	FALSE	TRUE	TRUE	TRUE
ICIDSLSAQLSQLQK	R	K	FALSE	FALSE	Q	15	1	15	2	7	0	2C(57.0215)	P02545	P02545	2B	298	sp|P02545-1|ENSG00000160789.19|LMNA|ENST00000368300.8|6152-HCT-15_RARE_RNA-R298C-and-6152-HCT-15_RARE_EXOME-R298C|298c|	LMNA_p.R298C	298	HCT-15	IA	TRUE	FALSE	TRUE	TRUE
ICVAELIQQLQQQALSEPAVVQK	K	K	FALSE	FALSE	R	23	10	32	2, 3	4	0	2C(57.0215)	Q13084	Q13084	2B	230	sp|Q13084|ENSG00000086504.15|MRPL28|ENST00000389675.6|151145-HCT-15_SNP_RNA-Y230C-and-151145-HCT-15_SNP_EXOME-Y230C|230c|	MRPL28_p.Y230C	230	HCT-15	IA	FALSE	TRUE	TRUE	TRUE
ICVAELIQQLQQQALSEPAVVQKR	K	R	FALSE	FALSE	A	24	10	33	3	3	0	2C(57.0215)	Q13084	Q13084	2B	230	sp|Q13084|ENSG00000086504.15|MRPL28|ENST00000389675.6|151145-HCT-15_SNP_RNA-Y230C-and-151145-HCT-15_SNP_EXOME-Y230C|230c|	MRPL28_p.Y230C	230	HCT-15	IA	FALSE	TRUE	TRUE	TRUE
IEPDRAQVDEVLQLR	R	R	FALSE	FALSE	E	15	1	15	3	1	0	NA	O60437	O60437	2B		sp|O60437|ENSG00000118898.15|PPL|ENST00000345988.6|152024-HCT-15_SNP_RNA-A1007V-and-152024-HCT-15_SNP_EXOME-A1007V|1007v|	PPL_p.A1007V	1007	HCT-15	IA	FALSE	TRUE	TRUE	TRUE
IFEEDPAVGAIVLTGGDK	K	K	FALSE	FALSE	A	18	1	18	2	9	0	NA	P30084	P30084	2B		sp|P30084|ENSG00000127884.4|ECHS1|ENST00000368547.3|102799-HCT-15_SNP_RNA-T75I-and-102799-HCT-15_SNP_EXOME-T75I|75i|	ECHS1_p.T75I	75	HCT-15	IA	FALSE	TRUE	TRUE	TRUE
IFEEDPAVGAIVLTGGDKAFAAGADIK	K	K	FALSE	FALSE	E	27	1	27	3	5	0	NA	P30084	P30084	2B		sp|P30084|ENSG00000127884.4|ECHS1|ENST00000368547.3|102799-HCT-15_SNP_RNA-T75I-and-102799-HCT-15_SNP_EXOME-T75I|75i|	ECHS1_p.T75I	75	HCT-15	IA	FALSE	TRUE	TRUE	TRUE
IIGLDQVAGMSETALLGAFK	R	K	FALSE	FALSE	T	20	1	20	2	3	0	10M(15.9949)	P35579	P35579	2B		sp|P35579-1|ENSG00000100345.21|MYH9|ENST00000216181.10|195651-HCT-15_RARE_RNA-P633L-and-195651-HCT-15_RARE_EXOME-P633L|633l|	MYH9_p.P633L	633	HCT-15	IA	TRUE	FALSE	TRUE	TRUE
ILAAQGQVSAQGGAQPSVEAPAAPRPTATQLTR	K	R	FALSE	FALSE	D	33	9	41	3	1	0	NA	Q9H936	Q9H936	2B		sp|Q9H936|ENSG00000177542.10|SLC25A22|ENST00000320230.9|109391-HCT-15_SNP_RNA-L150V-and-109391-HCT-15_SNP_EXOME-L150V|150v|	SLC25A22_p.L150V	150	HCT-15	IA	FALSE	TRUE	TRUE	TRUE
INAGMYILSPAVLR	K	R	FALSE	FALSE	R	14	11	24	2	2	0	NA	Q9Y5P6	Q9Y5P6	2B		sp|Q9Y5P6-1|ENSG00000173540.12|GMPPB|ENST00000480687.5|41018-HCT-15_SNP_RNA-Q184R-and-41018-HCT-15_SNP_EXOME-Q184R|184r|	GMPPB_p.Q184R	184	HCT-15	IA	FALSE	TRUE	TRUE	TRUE
IQPEDMFVYDINEK	R	K	FALSE	FALSE	D	14	1	14	2	2	0	NA	Q96GX9	Q96GX9	2B		sp|Q96GX9-1|ENSG00000149089.12|APIP|ENST00000395787.3|111040-HCT-15_SNP_RNA-C76Y-and-111040-HCT-15_SNP_EXOME-C76Y|76y|	APIP_p.C76Y	76	HCT-15	IA	FALSE	TRUE	TRUE	TRUE
ISYGPDWKDFYVVEPLAFEGTPEQK	R	K	FALSE	FALSE	A	25	3	27	3	7	0	NA	P06865	P06865	2B		sp|P06865-1|ENSG00000213614.9|HEXA|ENST00000268097.9|144124-HCT-15_SNP_RNA-I436V-and-144124-HCT-15_SNP_EXOME-I436V|436v|	HEXA_p.I436V	436	HCT-15	IA	FALSE	TRUE	TRUE	TRUE
ITDAYLDQYLR	K	R	FALSE	FALSE	Y	11	27	37	2	2	0	NA	Q6P2Q9	Q6P2Q9	2B		sp|Q6P2Q9|ENSG00000174231.16|PRPF8|ENST00000572621.5|162017-HCT-15_RARE_RNA-W927R-and-162017-HCT-15_RARE_EXOME-W927R|927r|	PRPF8_p.W927R	927	HCT-15	IA	TRUE	FALSE	TRUE	TRUE
ITGEAFMQFASQELAEK	K	K	FALSE	FALSE	A	17	29	45	2	6	0	NA	P52597	P52597	2B		sp|P52597|ENSG00000169813.16|HNRNPF|ENST00000443950.6|100445-HCT-15_SNP_RNA-V157M-and-100445-HCT-15_SNP_EXOME-V157M|157m|	HNRNPF_p.V157M	157	HCT-15	IA	FALSE	TRUE	TRUE	TRUE
ITPVSSGSGTMGAAK	K	K	FALSE	FALSE	V	15	20	34	2	5	0	NA	O75955	O75955	2B		sp|O75955-1|ENSG00000137312.14|FLOT1|ENST00000376389.7|68038-HCT-15_RARE_RNA-L380P-and-68038-HCT-15_RARE_EXOME-L380P|380p|	FLOT1_p.L380P	380	HCT-15	IA	TRUE	FALSE	TRUE	TRUE
KAAVPAPEEEMDECEQALAAEPK	K	K	FALSE	FALSE	A	23	7	29	2, 3	21	0	11M(15.9949), 14C(57.0215)	P26641	P26641	2B	266	sp|P26641-1|ENSG00000254772.9|EEF1G|ENST00000329251.4|112031-HCT-15_RARE_RNA-A256V-and-112031-HCT-15_RARE_EXOME-A256V|256v|	EEF1G_p.A256V	256	HCT-15	IA	TRUE	FALSE	TRUE	TRUE
KADLINR	R	R	FALSE	FALSE	S	7	19	25	2	3	0	NA	Q8WUM4	Q8WUM4	2B		sp|Q8WUM4-1|ENSG00000170248.13|PDCD6IP|ENST00000307296.7|33852-HCT-15_SNP_RNA-V378I-and-33852-HCT-15_SNP_EXOME-V378I|378i|	PDCD6IP_p.V378I	378	HCT-15	IA	FALSE	TRUE	TRUE	TRUE
KAFSEYLGTDQSK	K	K	FALSE	FALSE	W	13	21	33	2, 3	7	0	NA	P10768	P10768	2B		sp|P10768|ENSG00000139684.13|ESD|ENST00000378720.7|129610-HCT-15_SNP_RNA-G190E-and-129610-HCT-15_SNP_EXOME-G190E|190e|	ESD_p.G190E	190	HCT-15	IA	FALSE	TRUE	TRUE	TRUE
KEFSPFGTITSANVMMEGGR	R	R	FALSE	FALSE	S	20	1	20	3	3	0	NA	Q9H361	Q9H361	2B		sp|Q9H361|ENSG00000151846.8|PABPC3|ENST00000281589.4|127260-HCT-15_RARE_RNA-K324N,127260-HCT-15_RARE_RNA-A313E|313e324n|;sp|P11940-1|ENSG00000070756.15|PABPC1|ENST00000318607.9|87770-HCT-15_RARE_EXOME-K324N|324n|	PABPC3_p.K324N,A313E;PABPC1_p.K324N	324,313;324	HCT-15	IA	TRUE	FALSE	TRUE	TRUE
KFAEAFEDIPR	K	R	FALSE	FALSE	A	11	21	31	2, 3	9	0	NA	P50990	P50990	2B		sp|P50990-1|ENSG00000156261.12|CCT8|ENST00000286788.8|191141-HCT-15_RARE_RNA-A447D-and-191141-HCT-15_RARE_EXOME-A447D|447d|	CCT8_p.A447D	447	HCT-15	IA	TRUE	FALSE	TRUE	TRUE
KFDDAVVQSDMK	R	K	FALSE	FALSE	H	12	8	19	2, 3	33	0	11M(15.9949)	P11142	P11142	2B		sp|P11142-1|ENSG00000109971.13|HSPA8|ENST00000532636.5|115059-HCT-15_RARE_RNA-R77K-and-115059-HCT-15_RARE_EXOME-R77K|77k|	HSPA8_p.R77K	77	HCT-15	IA	TRUE	FALSE	TRUE	TRUE
KFDVNASAVQVLIEHIGNLDR	R	R	FALSE	FALSE	A	21	30	50	3	1	0	NA	Q00610	Q00610	2B		sp|Q00610-1|ENSG00000141367.11|CLTC|ENST00000269122.7|160025-HCT-15_RARE_RNA-T1079A-and-160025-HCT-15_RARE_EXOME-T1079A|1079a|	CLTC_p.T1079A	1079	HCT-15	IA	TRUE	FALSE	TRUE	TRUE
KFFGSLPDSWAR	R	R	FALSE	FALSE	G	12	10	21	3	1	0	NA	Q9BUP3	Q9BUP3	2B		sp|Q9BUP3-1|ENSG00000109854.13|HTATIP2|ENST00000421577.6|104095-HCT-15_SNP_RNA-S197R-and-104095-HCT-15_SNP_EXOME-S197R|197r|	HTATIP2_p.S197R	197	HCT-15	IA	FALSE	TRUE	TRUE	TRUE
KFSKEEPISSGPEEAVGK	R	K	FALSE	FALSE	S	18	1	18	3	2	0	NA	O00567	O00567	2B		sp|O00567|ENSG00000101361.16|NOP56|ENST00000329276.9|185156-HCT-15_RARE_RNA-V568I-and-185156-HCT-15_RARE_EXOME-V568I|568i|	NOP56_p.V568I	568	HCT-15	IA	TRUE	FALSE	TRUE	TRUE
KGLDDGNINNIYFNAEAGAIGESHGINIICETVDK	M	K	FALSE	FALSE	Q	35	1	35	4	1	0	30C(57.0215)	Q7Z3T8	Q7Z3T8	2B	596	sp|Q7Z3T8-1|ENSG00000039319.16|ZFYVE16|ENST00000338008.9|55039-HCT-15_SNP_RNA-I598T-and-55039-HCT-15_SNP_EXOME-I598T|598t|	ZFYVE16_p.I598T	598	HCT-15	IA	FALSE	TRUE	TRUE	TRUE
KHTLSFVDVGTGK	R	K	FALSE	FALSE	V	13	1	13	3	1	0	NA	P31040	P31040	2B		sp|P31040-1|ENSG00000073578.16|SDHA|ENST00000264932.10|53319-HCT-15_RARE_RNA-Y629F-and-53319-HCT-15_RARE_EXOME-Y629F|629f|	SDHA_p.Y629F	629	HCT-15	IA	TRUE	FALSE	TRUE	TRUE
KIDAAQNWFADPNGGPEGEEQIR	K	R	FALSE	FALSE	G	23	8	30	3	8	0	NA	P18206	P18206	2B		sp|P18206-1|ENSG00000035403.17|VCL|ENST00000211998.9|97891-HCT-15_RARE_EXOME-L395F|395f|	VCL_p.L395F	395	HCT-15	IA	TRUE	FALSE	FALSE	TRUE
KNDKEAAGEGPALYEDPPDHK	K	K	FALSE	FALSE	T	21	3	23	4	5	0	NA	P27695	P27695	2B		sp|P27695|ENSG00000100823.11|APEX1|ENST00000555414.5|130585-HCT-15_SNP_RNA-Q51H-and-130585-HCT-15_SNP_EXOME-Q51H|51h|	APEX1_p.Q51H	51	HCT-15	IA	FALSE	TRUE	TRUE	TRUE
KPEDVLDDDGAGSAPLK	R	K	FALSE	FALSE	S	17	33	49	3	1	0	NA	P35613	P35613	2B		sp|P35613-1|ENSG00000172270.19|BSG|ENST00000333511.8|172215-HCT-15_RARE_EXOME-D359G|359g|	BSG_p.D359G	359	HCT-15	IA	TRUE	FALSE	FALSE	TRUE
KSQIFSIASDNQPTVTIK	K	K	FALSE	FALSE	V	18	10	27	3	5	0	NA	P11021	P11021	2B		sp|P11021|ENSG00000044574.7|HSPA5|ENST00000324460.6|95250-HCT-15_RARE_RNA-T453I-and-95250-HCT-15_RARE_EXOME-T453I|453i|	HSPA5_p.T453I	453	HCT-15	IA	TRUE	FALSE	TRUE	TRUE
KYCNFDIPK	K	K	FALSE	FALSE	E	9	7	15	2	2	0	3C(57.0215)	Q9Y696	Q9Y696	2B	206	sp|Q9Y696|ENSG00000169504.14|CLIC4|ENST00000374379.8|1394-HCT-15_RARE_RNA-R206C-and-1394-HCT-15_RARE_EXOME-R206C|206c|	CLIC4_p.R206C	206	HCT-15	IA	TRUE	FALSE	TRUE	TRUE
KYTLPPGVDPAQVSSSLSPEGTLTVEAPMPK	R	K	FALSE	FALSE	L	31	7	37	3	14	0	29M(15.9949)	P04792	P04792	2B		sp|P04792|ENSG00000106211.8|HSPB1|ENST00000248553.6|73783-HCT-15_RARE_RNA-T151A-and-73783-HCT-15_RARE_EXOME-T151A|151a|	HSPB1_p.T151A	151	HCT-15	IA	TRUE	FALSE	TRUE	TRUE
LADDVDLEQVSNETHGHVGADLAALCSEAALQAIR	K	R	FALSE	FALSE	K	35	6	40	3, 4	7	0	26C(57.0215)	P55072	P55072	2B	415	sp|P55072|ENSG00000165280.15|VCP|ENST00000358901.10|93504-HCT-15_RARE_EXOME-A400S|400s|	VCP_p.A400S	400	HCT-15	IA	TRUE	FALSE	FALSE	TRUE
LADDVDLEQVSNETHGHVGADLAALCSEAALQAIRK	K	K	FALSE	FALSE	K	36	6	41	5	1	0	26C(57.0215)	P55072	P55072	2B	415	sp|P55072|ENSG00000165280.15|VCP|ENST00000358901.10|93504-HCT-15_RARE_EXOME-A400S|400s|	VCP_p.A400S	400	HCT-15	IA	TRUE	FALSE	FALSE	TRUE
LASDDRPSPLR	K	R	FALSE	FALSE	G	11	3	13	3	1	0	NA	P98175	P98175	2B		sp|P98175-1|ENSG00000182872.15|RBM10|ENST00000377604.7|197365-HCT-15_RARE_EXOME-P725L|725l|	RBM10_p.P725L	725	HCT-15	IA	TRUE	FALSE	FALSE	TRUE
LCFVALDFDQEMATVASSSSLEK	K	K	FALSE	FALSE	S	23	1	23	2	2	0	2C(57.0215)	P0CG39	P0CG39	2B	880	sp|P0CG39|ENSG00000222038.3|POTEJ|ENST00000409602.1|21958-HCT-15_RARE_EXOME-E887D,21958-HCT-15_SNP_EXOME-Y881F,21958-HCT-15_SNP_EXOME-M892T|881f887d892t|	POTEJ_p.E887D,Y881F,M892T	887881892	HCT-15	IA	TRUE	TRUE	FALSE	TRUE
LCFVALDFEQEMAIAASSSSLEK	K	K	FALSE	FALSE	S	23	1	23	2	3	0	2C(57.0215)	P0CG38	P0CG38	2B	917	sp|P0CG38|ENSG00000196834.11|POTEI|ENST00000451531.6|29623-HCT-15_SNP_EXOME-M929I,29623-HCT-15_SNP_EXOME-Y918F|918f929i|	POTEI_p.M929I,Y918F	929918	HCT-15	IA	FALSE	TRUE	FALSE	TRUE
LCFVALDFEQEMAMAASSSSLEK	K	K	FALSE	FALSE	S	23	1	23	2	1	0	12M(15.9949)	P0CG38	P0CG38	2B	917	sp|P0CG38|ENSG00000196834.11|POTEI|ENST00000451531.6|29623-HCT-15_SNP_EXOME-Y918F|918f|	POTEI_p.Y918F	918	HCT-15	IA	FALSE	TRUE	FALSE	TRUE
LDTGPQSMSGK	R	K	FALSE	FALSE	S	11	1	11	2	1	0	NA	P35269	P35269	2B		sp|P35269|ENSG00000125651.13|GTF2F1|ENST00000394456.9|179589-HCT-15_RARE_RNA-L432M-and-179589-HCT-15_RARE_EXOME-L432M|432m|	GTF2F1_p.L432M	432	HCT-15	IA	TRUE	FALSE	TRUE	TRUE
LEAVSHTSDMHSGYADSPSK	R	K	FALSE	FALSE	A	20	1	20	2, 3, 4	21	0	10M(15.9949)	Q01518	Q01518	2B		sp|Q01518-1|ENSG00000131236.16|CAP1|ENST00000372797.7|2315-HCT-15_RARE_RNA-R29S-and-2315-HCT-15_RARE_EXOME-R29S|29s|	CAP1_p.R29S	29	HCT-15	IA	TRUE	FALSE	TRUE	TRUE
LEGILEGLGLR	R	R	FALSE	FALSE	E	11	13	23	2	1	0	NA	Q9BSH5	Q9BSH5	2B		sp|Q9BSH5|ENSG00000119431.9|HDHD3|ENST00000238379.9|94947-HCT-15_SNP_RNA-G146E-and-94947-HCT-15_SNP_EXOME-G146E|146e|	HDHD3_p.G146E	146	HCT-15	IA	FALSE	TRUE	TRUE	TRUE
LFDFQGLQHQVAHVSTQLEAAR	R	R	FALSE	FALSE	L	22	9	30	3, 4	3	0	NA	P45954	P45954	2B		sp|P45954-1|ENSG00000196177.12|ACADSB|ENST00000358776.6|99302-HCT-15_RARE_RNA-A340S-and-99302-HCT-15_RARE_EXOME-A340S|340s|	ACADSB_p.A340S	340	HCT-15	IA	TRUE	FALSE	TRUE	TRUE
LFGTSPATEAAPPPPEPVPAAQGPATVQSVEDFVPDDRLDR	R	R	FALSE	FALSE	S	41	9	49	3	3	0	NA	Q3YEC7	Q3YEC7	2B		sp|Q3YEC7-1|ENSG00000196642.18|RABL6|ENST00000311502.11|92549-HCT-15_SNP_RNA-E382Q-and-92549-HCT-15_SNP_EXOME-E382Q|382q|	RABL6_p.E382Q	382	HCT-15	IA	FALSE	TRUE	TRUE	TRUE
LFHECCPHSTDR	K	R	FALSE	FALSE	V	12	11	22	2, 3, 4	8	0	5C(57.0215), 6C(57.0215)	P61978	P61978	2B	184185	sp|P61978|ENSG00000165119.20|HNRNPK|ENST00000351839.7|94211-HCT-15_RARE_RNA-Q182H-and-94211-HCT-15_RARE_EXOME-Q182H|182h|	HNRNPK_p.Q182H	182	HCT-15	IA	TRUE	FALSE	TRUE	TRUE
LGGTTDDCELVEGLVLTQK	K	K	FALSE	FALSE	V	19	7	25	2	3	0	8C(57.0215)	P50991	P50991	2B	221	sp|P50991-1|ENSG00000115484.14|CCT4|ENST00000394440.7|27519-HCT-15_RARE_EXOME-I218T|218t|	CCT4_p.I218T	218	HCT-15	IA	TRUE	FALSE	FALSE	TRUE
LGITPEGQSYLDQFR	K	R	FALSE	FALSE	Q	15	7	21	2	2	0	NA	Q2M389	Q2M389	2B		sp|Q2M389-1|ENSG00000136051.14|WASHC4|ENST00000332180.9|119892-HCT-15_SNP_RNA-V901I-and-119892-HCT-15_SNP_EXOME-V901I|901i|	WASHC4_p.V901I	901	HCT-15	IA	FALSE	TRUE	TRUE	TRUE
LGNDAVSQDSSSPALSSVER	K	R	FALSE	FALSE	S	20	11	30	2	1	0	NA	Q5VZK9	Q5VZK9	2B		sp|Q5VZK9-1|ENSG00000079691.17|LRRC16A|ENST00000329474.6|63315-HCT-15_SNP_RNA-G1202S-and-63315-HCT-15_SNP_EXOME-G1202S|1202s|	LRRC16A_p.G1202S	1202	HCT-15	IA	FALSE	TRUE	TRUE	TRUE
LGPGGLDPVEVYESLHEELQK	R	K	FALSE	FALSE	C	21	13	33	3	9	0	NA	Q16543	Q16543	2B		sp|Q16543|ENSG00000105401.8|CDC37|ENST00000222005.6|180096-HCT-15_RARE_EXOME-P302H|302h|	CDC37_p.P302H	302	HCT-15	IA	TRUE	FALSE	FALSE	TRUE
LHIHIAEISK	K	K	FALSE	FALSE	L	10	5	14	3	1	0	NA	Q56VL3	Q56VL3	2B		sp|Q56VL3-1|ENSG00000145247.11|OCIAD2|ENST00000508632.5|50282-HCT-15_RARE_RNA-R36I-and-50282-HCT-15_RARE_EXOME-R36I|36i|	OCIAD2_p.R36I	36	HCT-15	IA	TRUE	FALSE	TRUE	TRUE
LIDIPDPVPALDLGQQLQLK	R	K	FALSE	FALSE	V	20	15	34	2	2	0	NA	Q13948	Q13948	2B		sp|Q13948-1|ENSG00000257923.10|CUX1|ENST00000292538.9|74767-HCT-15_RARE_EXOME-V99I|99i|;sp|P39880-1|ENSG00000257923.10|CUX1|ENST00000546411.7|74775-HCT-15_RARE_EXOME-V88I|88i|	CUX1_p.V99I;CUX1_p.V88I	99;88	HCT-15	IA	TRUE	FALSE	FALSE	TRUE
LIHVMLMDNSTPQSEGGTLK	R	K	FALSE	FALSE	A	20	8	27	3	3	0	NA	Q7LBC6	Q7LBC6	2B		sp|Q7LBC6-1|ENSG00000120733.13|KDM3B|ENST00000314358.9|56317-HCT-15_SNP_RNA-A256T-and-56317-HCT-15_SNP_EXOME-A256T|256t|	KDM3B_p.A256T	256	HCT-15	IA	FALSE	TRUE	TRUE	TRUE
LLDTVDDMLANDIVR	K	R	FALSE	FALSE	L	15	5	19	2	1	0	NA	Q9H4M9	Q9H4M9	2B		sp|Q9H4M9|ENSG00000110047.17|EHD1|ENST00000320631.7|112450-HCT-15_RARE_RNA-A391V-and-112450-HCT-15_RARE_EXOME-A391V|391v|	EHD1_p.A391V	391	HCT-15	IA	TRUE	FALSE	TRUE	TRUE
LLLPGELANHAVSEGTK	R	K	FALSE	FALSE	A	17	10	26	2, 3	19	0	NA	Q99880	Q99880	2B		sp|Q99880|ENSG00000185130.5|HIST1H2BL|ENST00000377401.3|67796-HCT-15_RARE_RNA-K109N-and-67796-HCT-15_RARE_EXOME-K109N|109n|	HIST1H2BL_p.K109N	109	HCT-15	IA	TRUE	FALSE	TRUE	TRUE
LLPHGLAVYASPENK	R	K	FALSE	FALSE	K	15	1	15	3	1	0	NA	Q9BYD2	Q9BYD2	2B		sp|Q9BYD2|ENSG00000143436.10|MRPL9|ENST00000368830.7|14679-HCT-15_RARE_RNA-Q126H-and-14679-HCT-15_RARE_EXOME-Q126H|126h|	MRPL9_p.Q126H	126	HCT-15	IA	TRUE	FALSE	TRUE	TRUE
LLPHGLAVYASPENKK	R	K	FALSE	FALSE	L	16	1	16	3	2	0	NA	Q9BYD2	Q9BYD2	2B		sp|Q9BYD2|ENSG00000143436.10|MRPL9|ENST00000368830.7|14679-HCT-15_RARE_RNA-Q126H-and-14679-HCT-15_RARE_EXOME-Q126H|126h|	MRPL9_p.Q126H	126	HCT-15	IA	TRUE	FALSE	TRUE	TRUE
LLQAQAAGVDWR	R	R	FALSE	FALSE	E	12	1	12	2	5	0	NA	Q5SY16	Q5SY16	2B		sp|Q5SY16|ENSG00000162408.10|NOL9|ENST00000377705.5|9966-HCT-15_SNP_EXOME-S58A|58a|	NOL9_p.S58A	58	HCT-15	IA	FALSE	TRUE	FALSE	TRUE
LLQDLQLGDEEDAWKR	R	R	FALSE	FALSE	N	16	1	16	3	1	0	NA	Q14692	Q14692	2B		sp|Q14692|ENSG00000165733.7|BMS1|ENST00000374518.5|97133-HCT-15_SNP_RNA-R38W-and-97133-HCT-15_SNP_EXOME-R38W|38w|	BMS1_p.R38W	38	HCT-15	IA	FALSE	TRUE	TRUE	TRUE
LLSDLLPPSTGTFQEAQSR	R	R	FALSE	FALSE	L	19	11	29	2	10	0	NA	Q9Y490	Q9Y490	2B		sp|Q9Y490|ENSG00000137076.20|TLN1|ENST00000314888.9|93585-HCT-15_SNP_EXOME-S1227L|1227l|	TLN1_p.S1227L	1227	HCT-15	IA	FALSE	TRUE	FALSE	TRUE
LLTQDEGPALVPGSR	R	R	FALSE	FALSE	L	15	7	21	2	1	0	NA	Q5T440	Q5T440	2B		sp|Q5T440|ENSG00000181873.12|IBA57|ENST00000366711.3|8718-HCT-15_SNP_RNA-G211S-and-8718-HCT-15_SNP_EXOME-G211S|211s|	IBA57_p.G211S	211	HCT-15	IA	FALSE	TRUE	TRUE	TRUE
LNATEEMLQQELLSR	K	R	FALSE	FALSE	T	15	5	19	2	2	0	NA	Q86W92	Q86W92	2B		sp|Q86W92-1|ENSG00000110841.13|PPFIBP1|ENST00000318304.12|116846-HCT-15_SNP_RNA-V148L-and-116846-HCT-15_SNP_EXOME-V148L|148l|	PPFIBP1_p.V148L	148	HCT-15	IA	FALSE	TRUE	TRUE	TRUE
LNEGSSAMANGVEEKEPEAPEM	R	M	FALSE	FALSE	-	22	6	27	2	1	0	NA	Q9UHD8	Q9UHD8	2B		sp|Q9UHD8-1|ENSG00000184640.17|SEPT9|ENST00000427177.5|161108-HCT-15_SNP_RNA-M576V-and-161108-HCT-15_SNP_EXOME-M576V|576v|	SEPT9_p.M576V	576	HCT-15	IA	FALSE	TRUE	TRUE	TRUE
LNLPINIIGLAPLCENIPSGK	K	K	FALSE	FALSE	A	21	21	41	2	3	0	14C(57.0215)	P28838	P28838	2B	335	sp|P28838-1|ENSG00000002549.12|LAP3|ENST00000226299.8|45960-HCT-15_RARE_RNA-M338I-and-45960-HCT-15_RARE_EXOME-M338I|338i|	LAP3_p.M338I	338	HCT-15	IA	TRUE	FALSE	TRUE	TRUE
LPGELANHAVSEGTK	L	K	FALSE	FALSE	A	15	12	26	3	5	0	NA	Q99880	Q99880	2B		sp|Q99880|ENSG00000185130.5|HIST1H2BL|ENST00000377401.3|67796-HCT-15_RARE_RNA-K109N-and-67796-HCT-15_RARE_EXOME-K109N|109n|	HIST1H2BL_p.K109N	109	HCT-15	IA	TRUE	FALSE	TRUE	TRUE
LQELTPSSGDPGEHDPASTHK	R	K	FALSE	FALSE	S	21	8	28	3, 4	6	0	NA	Q14258	Q14258	2B		sp|Q14258|ENSG00000121060.16|TRIM25|ENST00000316881.8|166246-HCT-15_SNP_RNA-P358L-and-166246-HCT-15_SNP_EXOME-P358L|358l|	TRIM25_p.P358L	358	HCT-15	IA	FALSE	TRUE	TRUE	TRUE
LQGELEKYQQLQK	K	K	FALSE	FALSE	D	13	9	21	3	3	0	NA	O15212	O15212	2B		sp|O15212|ENSG00000204220.11|PFDN6|ENST00000395131.5|64317-HCT-15_RARE_RNA-V13L-and-64317-HCT-15_RARE_EXOME-V13L|13l|	PFDN6_p.V13L	13	HCT-15	IA	TRUE	FALSE	TRUE	TRUE
LQPPSGTELLAFNPIVHPSAITQVLLLANPQK	K	K	FALSE	FALSE	E	32	5	36	3	1	0	NA	Q9UJY5	Q9UJY5	2B		sp|Q9UJY5-1|ENSG00000100083.18|GGA1|ENST00000343632.8|193521-HCT-15_RARE_RNA-P581L-and-193521-HCT-15_RARE_EXOME-P581L|581l|	GGA1_p.P581L	581	HCT-15	IA	TRUE	FALSE	TRUE	TRUE
LQQEANLLQLK	K	K	FALSE	FALSE	S	11	1	11	2	4	0	NA	Q15149	Q15149	2B		sp|Q15149-1|ENSG00000178209.14|PLEC|ENST00000322810.8|89058-HCT-15_RARE_RNA-K2604N-and-89058-HCT-15_RARE_EXOME-K2604N|2604n|	PLEC_p.K2604N	2604	HCT-15	IA	TRUE	FALSE	TRUE	TRUE
LQQLPADFGHLVNLQHLDLLNNK	K	K	FALSE	FALSE	L	23	1	23	3, 4	5	0	NA	Q96AG4	Q96AG4	2B		sp|Q96AG4|ENSG00000108829.9|LRRC59|ENST00000225972.7|166134-HCT-15_RARE_RNA-R83H-and-166134-HCT-15_RARE_EXOME-R83H|83h|	LRRC59_p.R83H	83	HCT-15	IA	TRUE	FALSE	TRUE	TRUE
LQQQHSEQPPLQPSPVTTR	R	R	FALSE	FALSE	R	19	1	19	3	4	0	NA	Q5JTV8	Q5JTV8	2B		sp|Q5JTV8-1|ENSG00000143337.18|TOR1AIP1|ENST00000606911.6|7196-HCT-15_SNP_RNA-M146T-and-7196-HCT-15_SNP_EXOME-M146T|146t|	TOR1AIP1_p.M146T	146	HCT-15	IA	FALSE	TRUE	TRUE	TRUE
LQQQLTQAAQELASEKEK	K	K	FALSE	FALSE	L	18	1	18	3	1	0	NA	Q15075	Q15075	2B		sp|Q15075|ENSG00000102189.16|EEA1|ENST00000322349.12|125296-HCT-15_SNP_RNA-A1009S-and-125296-HCT-15_SNP_EXOME-A1009S|1009s|	EEA1_p.A1009S	1009	HCT-15	IA	FALSE	TRUE	TRUE	TRUE
LSDSYSNTLPVGK	K	K	FALSE	FALSE	S	13	1	13	2	7	0	NA	Q9UQB8	Q9UQB8	2B		sp|Q9UQB8-1|ENSG00000175866.15|BAIAP2|ENST00000321300.10|161442-HCT-15_RARE_RNA-R344G-and-161442-HCT-15_RARE_EXOME-R344G|344g|	BAIAP2_p.R344G	344	HCT-15	IA	TRUE	FALSE	TRUE	TRUE
LSPYALAFMPPGYEEDMK	K	K	FALSE	FALSE	L	18	8	25	2	1	0	NA	Q9BXJ9	Q9BXJ9	2B		sp|Q9BXJ9-1|ENSG00000164134.12|NAA15|ENST00000296543.9|48202-HCT-15_RARE_RNA-F832S-and-48202-HCT-15_RARE_EXOME-F832S|832s|	NAA15_p.F832S	832	HCT-15	IA	TRUE	FALSE	TRUE	TRUE
LTQAQIFDYSEIPNFPR	K	R	FALSE	FALSE	S	17	20	36	2	2	0	NA	P00491	P00491	2B		sp|P00491|ENSG00000198805.11|PNP|ENST00000361505.9|130606-HCT-15_SNP_RNA-G51S-and-130606-HCT-15_SNP_EXOME-G51S|51s|	PNP_p.G51S	51	HCT-15	IA	FALSE	TRUE	TRUE	TRUE
LVDYLEWIR	R	R	FALSE	FALSE	K	9	1	9	2	1	0	NA	Q96BR5	Q96BR5	2B		sp|Q96BR5|ENSG00000162377.5|COA7|ENST00000371538.4|12322-HCT-15_RARE_RNA-G46W-and-12322-HCT-15_RARE_EXOME-G46W|46w|	COA7_p.G46W	46	HCT-15	IA	TRUE	FALSE	TRUE	TRUE
LVVVGAGDVGK	K	K	FALSE	FALSE	S	11	6	16	2	3	0	NA	P01116	P01116	2B		sp|P01116-1|ENSG00000133703.11|KRAS|ENST00000256078.8|122572-HCT-15_RARE_RNA-G13D-and-122572-HCT-15_RARE_EXOME-G13D|13d|	KRAS_p.G13D	13	HCT-15	IA	TRUE	FALSE	TRUE	TRUE
MDAVNAFNQELFSLMNMKPPISR	-	R	FALSE	FALSE	A	23	1	23	2	2	0	17M(15.9949), N-term(42.0106)	O95104	O95104	2B		sp|O95104-1|ENSG00000156304.14|SCAF4|ENST00000286835.11|191214-HCT-15_RARE_RNA-D16N-and-191214-HCT-15_RARE_EXOME-D16N|16n|	SCAF4_p.D16N	16	HCT-15	IA	TRUE	FALSE	TRUE	TRUE
MEAVVNLYQEVMNHADPR	-	R	FALSE	FALSE	L	18	1	18	2	1	0	N-term(42.0106)	Q9BW60	Q9BW60	2B		sp|Q9BW60-1|ENSG00000066322.14|ELOVL1|ENST00000372458.7|11828-HCT-15_RARE_RNA-K13N-and-11828-HCT-15_RARE_EXOME-K13N|13n|	ELOVL1_p.K13N	13	HCT-15	IA	TRUE	FALSE	TRUE	TRUE
MEERGDSEPTPGCSGLGPDGVR	-	R	FALSE	FALSE	G	22	0	21	2	1	0	13C(57.0215), N-term(42.0106)	Q8WW01	Q8WW01	2B	13	sp|Q8WW01-1|ENSG00000198860.12|TSEN15|ENST00000645668.1|7351-HCT-15_SNP_RNA-G19D-and-7351-HCT-15_SNP_EXOME-G19D|19d|	TSEN15_p.G19D	19	HCT-15	IA	FALSE	TRUE	TRUE	TRUE
MHKEEHEVAVLGAPPSTILPR	-	R	FALSE	FALSE	S	21	1	21	4	3	0	N-term(42.0106)	P13164	P13164	2B		sp|P13164|ENSG00000185885.15|IFITM1|ENST00000528780.5|102878-HCT-15_RARE_RNA-P13A-and-102878-HCT-15_RARE_EXOME-P13A|13a|	IFITM1_p.P13A	13	HCT-15	IA	TRUE	FALSE	TRUE	TRUE
MLEANDGSGMLDEDEEDLQR	R	R	FALSE	FALSE	A	20	8	27	2	1	0	NA	P54252	P54252	2B		sp|P54252-2|ENSG00000066427.22|ATXN3|ENST00000644486.1|137174-HCT-15_SNP_RNA-V212M-and-137174-HCT-15_SNP_EXOME-V212M|212m|	ATXN3_p.V212M	212	HCT-15	IA	FALSE	TRUE	TRUE	TRUE
MNVQCHACIGGTNIGEDIRKLDYGQHVVAGTPGR	Y	R	FALSE	FALSE	V	34	19	52	5	1	0	5C(57.0215)	P38919	P38919	2B	137140	sp|P38919|ENSG00000141543.9|EIF4A3|ENST00000269349.7|167882-HCT-15_RARE_RNA-V146I-and-167882-HCT-15_RARE_EXOME-V146I|146i|	EIF4A3_p.V146I	146	HCT-15	IA	TRUE	FALSE	TRUE	TRUE
MQYAPNTQVEILPQGR	R	R	FALSE	FALSE	E	16	16	31	2	1	0	NA	P40121	P40121	2B		sp|P40121-1|ENSG00000042493.15|CAPG|ENST00000263867.8|28345-HCT-15_SNP_RNA-H335R-and-28345-HCT-15_SNP_EXOME-H335R|335r|	CAPG_p.H335R	335	HCT-15	IA	FALSE	TRUE	TRUE	TRUE
NAINTEMYHEIMHALK	K	K	FALSE	FALSE	A	16	7	22	3	2	0	NA	O75521	O75521	2B		sp|O75521-1|ENSG00000198721.12|ECI2|ENST00000380118.7|67283-HCT-15_RARE_RNA-R174H-and-67283-HCT-15_RARE_EXOME-R174H|174h|	ECI2_p.R174H	174	HCT-15	IA	TRUE	FALSE	TRUE	TRUE
NDFEWVYTDQPHTQR	R	R	FALSE	FALSE	R	15	8	22	2	1	0	NA	Q6QHC5	Q6QHC5	2B		sp|Q6QHC5|ENSG00000168350.7|DEGS2|ENST00000305631.6|137467-HCT-15_SNP_RNA-S8N-and-137467-HCT-15_SNP_EXOME-S8N|8n|	DEGS2_p.S8N	8	HCT-15	IA	FALSE	TRUE	TRUE	TRUE
NIGVIVVGFPATPIIESR	R	R	FALSE	FALSE	A	18	8	25	2	3	0	NA	O15270	O15270	2B		sp|O15270|ENSG00000100596.6|SPTLC2|ENST00000216484.6|136873-HCT-15_RARE_RNA-V494I-and-136873-HCT-15_RARE_EXOME-V494I|494i|	SPTLC2_p.V494I	494	HCT-15	IA	TRUE	FALSE	TRUE	TRUE
NIHMCLGGLFVPEAYITATR	K	R	FALSE	FALSE	Q	20	1	20	3	2	0	5C(57.0215)	Q14204	Q14204	2B	4510	sp|Q14204|ENSG00000197102.11|DYNC1H1|ENST00000360184.9|133954-HCT-15_RARE_RNA-V4509M-and-133954-HCT-15_RARE_EXOME-V4509M|4509m|	DYNC1H1_p.V4509M	4509	HCT-15	IA	TRUE	FALSE	TRUE	TRUE
NLHQSGFSLSDAQIDDNIPR	R	R	FALSE	FALSE	R	20	10	29	2, 3	7	0	NA	Q16555	Q16555	2B		sp|Q16555-1|ENSG00000092964.17|DPYSL2|ENST00000311151.9|82262-HCT-15_RARE_EXOME-G543D|543d|	DPYSL2_p.G543D	543	HCT-15	IA	TRUE	FALSE	FALSE	TRUE
NLHQSGFSLSDAQIDDNIPRR	R	R	FALSE	FALSE	T	21	10	30	4	1	0	NA	Q16555	Q16555	2B		sp|Q16555-1|ENSG00000092964.17|DPYSL2|ENST00000311151.9|82262-HCT-15_RARE_EXOME-G543D|543d|	DPYSL2_p.G543D	543	HCT-15	IA	TRUE	FALSE	FALSE	TRUE
NLPAGTLAAELQETFGHFGSLGR	K	R	FALSE	FALSE	V	23	9	31	3	1	0	NA	Q9Y4C8	Q9Y4C8	2B		sp|Q9Y4C8|ENSG00000122965.10|RBM19|ENST00000545145.6|126210-HCT-15_SNP_RNA-Q602E-and-126210-HCT-15_SNP_EXOME-Q602E|602e|	RBM19_p.Q602E	602	HCT-15	IA	FALSE	TRUE	TRUE	TRUE
NPLLDLAAYDQEGR	R	R	FALSE	FALSE	R	14	1	14	2	2	0	NA	Q8TEM1	Q8TEM1	2B		sp|Q8TEM1-1|ENSG00000132182.11|NUP210|ENST00000254508.6|39494-HCT-15_SNP_RNA-R786L-and-39494-HCT-15_SNP_EXOME-R786L|786l|	NUP210_p.R786L	786	HCT-15	IA	FALSE	TRUE	TRUE	TRUE
NSLEFFTMLAQR	R	R	FALSE	FALSE	R	12	10	21	2	2	0	NA	Q9BVP2	Q9BVP2	2B		sp|Q9BVP2-1|ENSG00000163938.16|GNL3|ENST00000418458.5|35128-HCT-15_SNP_RNA-V367M-and-35128-HCT-15_SNP_EXOME-V367M|367m|	GNL3_p.V367M	367	HCT-15	IA	FALSE	TRUE	TRUE	TRUE
NTNSVPETAPAAIPETRR	R	R	FALSE	FALSE	N	18	1	18	3	1	0	NA	P55265	P55265	2B		sp|P55265-1|ENSG00000160710.15|ADAR|ENST00000368474.8|14941-HCT-15_SNP_RNA-K384R-and-14941-HCT-15_SNP_EXOME-K384R|384r|	ADAR_p.K384R	384	HCT-15	IA	FALSE	TRUE	TRUE	TRUE
NTVLATWQPYSTSK	K	K	FALSE	FALSE	D	14	12	25	2	4	0	NA	Q9BY44	Q9BY44	2B		sp|Q9BY44-1|ENSG00000144895.11|EIF2A|ENST00000460851.5|37365-HCT-15_SNP_EXOME-T97S|97s|	EIF2A_p.T97S	97	HCT-15	IA	FALSE	TRUE	FALSE	TRUE
NVVYPLYQLGGPQLR	R	R	FALSE	FALSE	V	15	1	15	2	2	0	NA	Q16540	Q16540	2B		sp|Q16540|ENSG00000214026.10|MRPL23|ENST00000381519.5|103188-HCT-15_SNP_EXOME-R11Q|11q|	MRPL23_p.R11Q	11	HCT-15	IA	FALSE	TRUE	FALSE	TRUE
PAGPGEKVVRVLFPGCTPPAYLLDGLVR	H	R	FALSE	FALSE	L	28	1	28	3	1	0	16C(57.0215)	Q66K74	Q66K74	2B	435	sp|Q66K74-1|ENSG00000130479.10|MAP1S|ENST00000324096.8|174443-HCT-15_SNP_RNA-C440Y-and-174443-HCT-15_SNP_EXOME-C440Y|440y|	MAP1S_p.C440Y	440	HCT-15	IA	FALSE	TRUE	TRUE	TRUE
PEALFQPCFLGMESCDIHETTFNSIMK	C	K	TRUE	FALSE	S	27	1	27	3	1	0	12M(15.9949), 15C(57.0215), 8C(57.0215)	A5A3E0	A5A3E0	2B	965972	sp|A5A3E0|ENSG00000196604.12|POTEF|ENST00000409914.6|29568-HCT-15_RARE_EXOME-G973D|973d|;sp|Q6S8J3-1|ENSG00000188219.14|POTEE|ENST00000356920.9|22005-HCT-15_RARE_EXOME-G973D|973d|	POTEF_p.G973D;POTEE_p.G973D	973	HCT-15	IA	TRUE	FALSE	FALSE	TRUE
PFGTITSANVMMEGGR	S	R	FALSE	FALSE	S	16	1	16	2	1	0	NA	Q9H361	Q9H361	2B		sp|Q9H361|ENSG00000151846.8|PABPC3|ENST00000281589.4|127260-HCT-15_RARE_RNA-K324N|324n|;sp|P11940-1|ENSG00000070756.15|PABPC1|ENST00000318607.9|87770-HCT-15_RARE_EXOME-K324N|324n|	PABPC3_p.K324N;PABPC1_p.K324N	324	HCT-15	IA	TRUE	FALSE	TRUE	TRUE
PGELANHAVSEGTK	L	K	FALSE	FALSE	A	14	13	26	2	3	0	NA	Q99880	Q99880	2B		sp|Q99880|ENSG00000185130.5|HIST1H2BL|ENST00000377401.3|67796-HCT-15_RARE_RNA-K109N-and-67796-HCT-15_RARE_EXOME-K109N|109n|	HIST1H2BL_p.K109N	109	HCT-15	IA	TRUE	FALSE	TRUE	TRUE
PGFTVKDVNQQEFVR	M	R	FALSE	FALSE	A	15	2	16	3	1	0	NA	P39019	P39019	2B		sp|P39019|ENSG00000105372.7|RPS19|ENST00000598742.5|176411-HCT-15_RARE_RNA-V4F-and-176411-HCT-15_RARE_EXOME-V4F|4f|	RPS19_p.V4F	4	HCT-15	IA	TRUE	FALSE	TRUE	TRUE
PIVEPEILPDGGHDLKR	V	R	FALSE	FALSE	C	17	1	17	2	1	0	NA	P04075	P04075	2B		sp|P04075-1|ENSG00000149925.18|ALDOA|ENST00000569545.5|147948-HCT-15_RARE_RNA-D196G-and-147948-HCT-15_RARE_EXOME-D196G|196g|	ALDOA_p.D196G	196	HCT-15	IA	TRUE	FALSE	TRUE	TRUE
PLAGTNGETTIQGLDGLSER	V	R	FALSE	FALSE	C	20	9	28	2	4	0	NA	P04075	P04075	2B		sp|P04075-1|ENSG00000149925.18|ALDOA|ENST00000569545.5|147948-HCT-15_RARE_EXOME-T125I|125i|	ALDOA_p.T125I	125	HCT-15	IA	TRUE	FALSE	FALSE	TRUE
PVEVYESLHEELQKCFDVK	D	K	FALSE	FALSE	D	19	20	38	2	2	0	15C(57.0215)	Q16543	Q16543	2B	308	sp|Q16543|ENSG00000105401.8|CDC37|ENST00000222005.6|180096-HCT-15_RARE_EXOME-P302H|302h|	CDC37_p.P302H	302	HCT-15	IA	TRUE	FALSE	FALSE	TRUE
QAIDDDCNQTGQMTAGFLDWPQGTFASQVMLEGDKLK	K	K	FALSE	FALSE	V	37	11	47	3	2	0	7C(57.0215)	P38117	P38117	2B	131	sp|P38117-1|ENSG00000105379.9|ETFB|ENST00000309244.8|184092-HCT-15_SNP_RNA-T154M-and-184092-HCT-15_SNP_EXOME-T154M|154m|	ETFB_p.T154M	154	HCT-15	IA	FALSE	TRUE	TRUE	TRUE
QLATVNEQSLQNGFEELIQWTK	K	K	FALSE	FALSE	E	22	21	42	2	1	0	NA	Q92665	Q92665	2B		sp|Q92665|ENSG00000102738.7|MRPS31|ENST00000323563.7|129436-HCT-15_RARE_RNA-P293S-and-129436-HCT-15_RARE_EXOME-P293S|293s|	MRPS31_p.P293S	293	HCT-15	IA	TRUE	FALSE	TRUE	TRUE
QLGQDLLNSYTENEGK	R	K	FALSE	FALSE	M	16	15	30	2	2	0	NA	O95757	O95757	2B		sp|O95757|ENSG00000164070.11|HSPA4L|ENST00000508776.5|48077-HCT-15_SNP_RNA-I601T-and-48077-HCT-15_SNP_EXOME-I601T|601t|	HSPA4L_p.I601T	601	HCT-15	IA	FALSE	TRUE	TRUE	TRUE
QLWGLLIEEAEKR	K	R	FALSE	FALSE	H	13	1	13	3	2	0	NA	Q01082	Q01082	2B		sp|Q01082-1|ENSG00000115306.15|SPTBN1|ENST00000356805.8|19558-HCT-15_RARE_RNA-T1581A-and-19558-HCT-15_RARE_EXOME-T1581A|1581a|	SPTBN1_p.T1581A	1581	HCT-15	IA	TRUE	FALSE	TRUE	TRUE
QRAQEALLQLSQALSLMETVK	K	K	FALSE	FALSE	Q	21	1	21	3	1	0	NA	O60664	O60664	2B		sp|O60664-1|ENSG00000105355.8|PLIN3|ENST00000221957.8|179418-HCT-15_SNP_RNA-V275A-and-179418-HCT-15_SNP_EXOME-V275A|275a|	PLIN3_p.V275A	275	HCT-15	IA	FALSE	TRUE	TRUE	TRUE
QSGGSSQAGAVTVSDVQELMR	R	R	FALSE	FALSE	R	21	8	28	2	5	0	NA	O00233	O00233	2B		sp|O00233-1|ENSG00000110801.13|PSMD9|ENST00000541212.5|120676-HCT-15_SNP_RNA-V17A-and-120676-HCT-15_SNP_EXOME-V17A|17a|	PSMD9_p.V17A	17	HCT-15	IA	FALSE	TRUE	TRUE	TRUE
RCPEALFQPCFLGMESCDIHETTFNSIMK	F	K	FALSE	FALSE	S	29	1	29	3	1	0	10C(57.0215), 2C(57.0215)	A5A3E0	A5A3E0	2B	957965972	sp|A5A3E0|ENSG00000196604.12|POTEF|ENST00000409914.6|29568-HCT-15_RARE_EXOME-G973D|973d|;sp|Q6S8J3-1|ENSG00000188219.14|POTEE|ENST00000356920.9|22005-HCT-15_RARE_EXOME-G973D|973d|	POTEF_p.G973D;POTEE_p.G973D	973	HCT-15	IA	TRUE	FALSE	FALSE	TRUE
REPWLLPSQHNDIIQDALGQR	R	R	FALSE	FALSE	Y	21	12	32	4	1	0	NA	Q14697	Q14697	2B		sp|Q14697-1|ENSG00000089597.16|GANAB|ENST00000356638.7|112080-HCT-15_SNP_RNA-R698Q-and-112080-HCT-15_SNP_EXOME-R698Q|698q|	GANAB_p.R698Q	698	HCT-15	IA	FALSE	TRUE	TRUE	TRUE
RFEHLDPQNQHTFEAR	K	R	FALSE	FALSE	D	16	1	16	4	1	0	NA	Q02818	Q02818	2B		sp|Q02818|ENSG00000104805.15|NUCB1|ENST00000405315.8|177152-HCT-15_RARE_RNA-Q137R-and-177152-HCT-15_RARE_EXOME-Q137R|137r|	NUCB1_p.Q137R	137	HCT-15	IA	TRUE	FALSE	TRUE	TRUE
RGFGFVTFDDHDPVDKIALQK	K	K	FALSE	FALSE	Y	21	4	24	4	2	0	NA	P22626	P22626	2B		sp|P22626-1|ENSG00000122566.20|HNRNPA2B1|ENST00000354667.8|77381-HCT-15_RARE_EXOME-V170A|170a|	HNRNPA2B1_p.V170A	170	HCT-15	IA	TRUE	FALSE	FALSE	TRUE
RLGPGGLDPVEVYESLHEELQK	K	K	FALSE	FALSE	C	22	12	33	4	1	0	NA	Q16543	Q16543	2B		sp|Q16543|ENSG00000105401.8|CDC37|ENST00000222005.6|180096-HCT-15_RARE_EXOME-P302H|302h|	CDC37_p.P302H	302	HCT-15	IA	TRUE	FALSE	FALSE	TRUE
RPDYAPMESSDDEDEEFQFIK	K	K	FALSE	FALSE	K	21	9	29	3	2	0	NA	P55081	P55081	2B		sp|P55081|ENSG00000140259.6|MFAP1|ENST00000267812.3|142760-HCT-15_RARE_RNA-E55D-and-142760-HCT-15_RARE_EXOME-E55D|55d|	MFAP1_p.E55D	55	HCT-15	IA	TRUE	FALSE	TRUE	TRUE
RYEVPLETPR	R	R	FALSE	FALSE	V	10	1	10	2, 3	2	0	NA	P10253	P10253	2B		sp|P10253|ENSG00000171298.12|GAA|ENST00000390015.7|161319-HCT-15_SNP_RNA-H199R-and-161319-HCT-15_SNP_EXOME-H199R|199r|	GAA_p.H199R	199	HCT-15	IA	FALSE	TRUE	TRUE	TRUE
SACSLESNLEGLAGVLESDLPNYK	K	K	FALSE	FALSE	S	24	7	30	2	2	0	3C(57.0215)	Q09161	Q09161	2B	44	sp|Q09161|ENSG00000136937.12|NCBP1|ENST00000375147.7|91061-HCT-15_RARE_RNA-A59S-and-91061-HCT-15_RARE_EXOME-A59S|59s|	NCBP1_p.A59S	59	HCT-15	IA	TRUE	FALSE	TRUE	TRUE
SALFAQINQGESITHALK	R	K	FALSE	FALSE	H	18	1	18	2, 3	15	0	NA	Q01518	Q01518	2B		sp|Q01518-1|ENSG00000131236.16|CAP1|ENST00000372797.7|2315-HCT-15_RARE_RNA-S256A-and-2315-HCT-15_RARE_EXOME-S256A|256a|	CAP1_p.S256A	256	HCT-15	IA	TRUE	FALSE	TRUE	TRUE
SALQSINEWAAQTTNGKLPEVTK	R	K	FALSE	FALSE	D	23	6	28	3	2	0	NA	P50454	P50454	2B		sp|P50454|ENSG00000149257.13|SERPINH1|ENST00000533603.5|107237-HCT-15_RARE_RNA-D182N-and-107237-HCT-15_RARE_EXOME-D182N|182n|	SERPINH1_p.D182N	182	HCT-15	IA	TRUE	FALSE	TRUE	TRUE
SALSGHLETLILGLLK	K	K	FALSE	FALSE	T	16	11	26	2, 3	9	0	NA	P07355	P07355	2B		sp|P07355-1|ENSG00000182718.16|ANXA2|ENST00000396024.7|143450-HCT-15_SNP_RNA-V98L-and-143450-HCT-15_SNP_EXOME-V98L|98l|	ANXA2_p.V98L	98	HCT-15	IA	FALSE	TRUE	TRUE	TRUE
SALSGHLETLILGLLKTPAQYDASELK	K	K	FALSE	FALSE	A	27	11	37	3, 4	2	0	NA	P07355	P07355	2B		sp|P07355-1|ENSG00000182718.16|ANXA2|ENST00000396024.7|143450-HCT-15_SNP_RNA-V98L-and-143450-HCT-15_SNP_EXOME-V98L|98l|	ANXA2_p.V98L	98	HCT-15	IA	FALSE	TRUE	TRUE	TRUE
SCSYESASRSALFAQINQGESITHALK	L	K	FALSE	FALSE	H	27	1	27	3	2	0	2C(57.0215)	Q01518	Q01518	2B	247	sp|Q01518-1|ENSG00000131236.16|CAP1|ENST00000372797.7|2315-HCT-15_RARE_RNA-S256A-and-2315-HCT-15_RARE_EXOME-S256A|256a|	CAP1_p.S256A	256	HCT-15	IA	TRUE	FALSE	TRUE	TRUE
SDPLCILLQDVGGGSWAELGR	K	R	FALSE	FALSE	T	21	1	21	2	3	0	5C(57.0215)	Q99829	Q99829	2B	30	sp|Q99829|ENSG00000214078.12|CPNE1|ENST00000352393.8|188439-HCT-15_SNP_RNA-V31I-and-188439-HCT-15_SNP_EXOME-V31I|31i|	CPNE1_p.V31I	31	HCT-15	IA	FALSE	TRUE	TRUE	TRUE
SEDGTPAEDGTPAATGGSQPPSLGR	K	R	FALSE	FALSE	K	25	1	25	2	1	0	NA	Q9BQG0	Q9BQG0	2B		sp|Q9BQG0-1|ENSG00000132382.14|MYBBP1A|ENST00000254718.8|162299-HCT-15_SNP_RNA-M1208L-and-162299-HCT-15_SNP_EXOME-M1208L|1208l|	MYBBP1A_p.M1208L	1208	HCT-15	IA	FALSE	TRUE	TRUE	TRUE
SELPLDPLPLPTEEGNPLLK	K	K	FALSE	FALSE	H	20	13	32	2	8	0	NA	Q15758	Q15758	2B		sp|Q15758-1|ENSG00000105281.12|SLC1A5|ENST00000542575.6|183329-HCT-15_SNP_RNA-V512L-and-183329-HCT-15_SNP_EXOME-V512L|512l|	SLC1A5_p.V512L	512	HCT-15	IA	FALSE	TRUE	TRUE	TRUE
SFQGPVLIGSSHGGVNIEDVAAETPEAIIKEPIDIEEGIKK	R	K	FALSE	FALSE	E	41	14	54	5	1	0	NA	Q9P2R7	Q9P2R7	2B		sp|Q9P2R7-1|ENSG00000136143.15|SUCLA2|ENST00000643584.1|129620-HCT-15_SNP_RNA-S199T-and-129620-HCT-15_SNP_EXOME-S199T|199t|	SUCLA2_p.S199T	199	HCT-15	IA	FALSE	TRUE	TRUE	TRUE
SGGTLVLVGLGSEMTTVPLLHAAIR	R	R	FALSE	FALSE	E	25	25	49	3	1	0	NA	Q00796	Q00796	2B		sp|Q00796-1|ENSG00000140263.13|SORD|ENST00000267814.13|139296-HCT-15_RARE_RNA-N269T-and-139296-HCT-15_RARE_EXOME-N269T|269t|	SORD_p.N269T	269	HCT-15	IA	TRUE	FALSE	TRUE	TRUE
SGHIQILLR	K	R	FALSE	FALSE	A	9	6	14	2	1	0	NA	Q9Y3A6	Q9Y3A6	2B		sp|Q9Y3A6-1|ENSG00000117500.12|TMED5|ENST00000370282.7|13293-HCT-15_SNP_RNA-T175I-and-13293-HCT-15_SNP_EXOME-T175I|175i|	TMED5_p.T175I	175	HCT-15	IA	FALSE	TRUE	TRUE	TRUE
SGLLPSGPRPGYAAIQALLSSR	K	R	FALSE	FALSE	G	22	1	22	3	1	0	NA	P22570	P22570	2B		sp|P22570-1|ENSG00000161513.11|FDXR|ENST00000293195.9|167240-HCT-15_SNP_RNA-A427S-and-167240-HCT-15_SNP_EXOME-A427S|427s|	FDXR_p.A427S	427	HCT-15	IA	FALSE	TRUE	TRUE	TRUE
SGMSLTQDMLNGELKK	R	K	FALSE	FALSE	L	16	11	26	3	1	0	NA	Q5JPH6	Q5JPH6	2B		sp|Q5JPH6-1|ENSG00000103356.15|EARS2|ENST00000449606.5|152798-HCT-15_SNP_RNA-S457G-and-152798-HCT-15_SNP_EXOME-S457G|457g|	EARS2_p.S457G	457	HCT-15	IA	FALSE	TRUE	TRUE	TRUE
SGVDTDSSYFK	K	K	FALSE	FALSE	L	11	10	20	2	1	0	NA	Q9Y394	Q9Y394	2B		sp|Q9Y394-1|ENSG00000100612.13|DHRS7|ENST00000216500.9|136144-HCT-15_RARE_EXOME-A326T|326t|	DHRS7_p.A326T	326	HCT-15	IA	TRUE	FALSE	FALSE	TRUE
SIASDNQPTVTIK	F	K	FALSE	FALSE	V	13	15	27	2	1	0	NA	P11021	P11021	2B		sp|P11021|ENSG00000044574.7|HSPA5|ENST00000324460.6|95250-HCT-15_RARE_RNA-T453I-and-95250-HCT-15_RARE_EXOME-T453I|453i|	HSPA5_p.T453I	453	HCT-15	IA	TRUE	FALSE	TRUE	TRUE
SIDNGMFVQLVQANSPASLVGLR	K	R	FALSE	FALSE	F	23	5	27	2	1	0	NA	O00560	O00560	2B		sp|O00560-1|ENSG00000137575.11|SDCBP|ENST00000260130.8|83161-HCT-15_RARE_EXOME-I136M|136m|	SDCBP_p.I136M	136	HCT-15	IA	TRUE	FALSE	FALSE	TRUE
SILGLPLLPEDSIK	R	K	FALSE	FALSE	V	14	1	14	2	4	0	NA	Q5VSL9	Q5VSL9	2B		sp|Q5VSL9-1|ENSG00000143093.14|STRIP1|ENST00000369795.7|4699-HCT-15_RARE_RNA-P319L-and-4699-HCT-15_RARE_EXOME-P319L|319l|	STRIP1_p.P319L	319	HCT-15	IA	TRUE	FALSE	TRUE	TRUE
SKEHSLLHGDFHAFSAGPGLFSYIR	R	R	FALSE	FALSE	H	25	3	27	5	1	0	NA	P08195	P08195	2B		sp|P08195-1|ENSG00000168003.16|SLC3A2|ENST00000377890.6|105694-HCT-15_RARE_RNA-R534H-and-105694-HCT-15_RARE_EXOME-R534H|534h|	SLC3A2_p.R534H	534	HCT-15	IA	TRUE	FALSE	TRUE	TRUE
SLHQFLLEPITCHAWNMDR	M	R	FALSE	FALSE	T	19	2	20	3	8	0	12C(57.0215), 17M(15.9949), N-term(42.0106)	Q92747	Q92747	2B	13	sp|Q92747-1|ENSG00000241685.9|ARPC1A|ENST00000262942.9|74366-HCT-15_RARE_RNA-R18M-and-74366-HCT-15_RARE_EXOME-R18M|18m|	ARPC1A_p.R18M	18	HCT-15	IA	TRUE	FALSE	TRUE	TRUE
SNYSFEKPFLWLAR	K	R	FALSE	FALSE	K	14	15	28	2, 3	4	0	NA	P62826	P62826	2B		sp|P62826|ENSG00000132341.11|RAN|ENST00000543796.5|121053-HCT-15_RARE_RNA-N156S-and-121053-HCT-15_RARE_EXOME-N156S|156s|	RAN_p.N156S	156	HCT-15	IA	TRUE	FALSE	TRUE	TRUE
SPVLHFYVRPSGHEGAASGHTR	M	R	FALSE	FALSE	R	22	1	22	5	1	0	N-term(42.0106)	O15067	O15067	2B		sp|O15067|ENSG00000178921.13|PFAS|ENST00000314666.10|156540-HCT-15_SNP_RNA-P19S-and-156540-HCT-15_SNP_EXOME-P19S|19s|	PFAS_p.P19S	19	HCT-15	IA	FALSE	TRUE	TRUE	TRUE
SQAQILLR	R	R	FALSE	FALSE	W	8	1	8	2	4	0	NA	P14550	P14550	2B		sp|P14550|ENSG00000117448.13|AKR1A1|ENST00000372070.7|2889-HCT-15_RARE_RNA-P245Q-and-2889-HCT-15_RARE_EXOME-P245Q|245q|	AKR1A1_p.P245Q	245	HCT-15	IA	TRUE	FALSE	TRUE	TRUE
SQIFSIASDNQPTVTIK	K	K	FALSE	FALSE	V	17	11	27	2	14	0	NA	P11021	P11021	2B		sp|P11021|ENSG00000044574.7|HSPA5|ENST00000324460.6|95250-HCT-15_RARE_RNA-T453I-and-95250-HCT-15_RARE_EXOME-T453I|453i|	HSPA5_p.T453I	453	HCT-15	IA	TRUE	FALSE	TRUE	TRUE
SSFELHVAQGDHFIK	A	K	FALSE	FALSE	F	15	1	15	2	1	0	NA	Q8NBS9	Q8NBS9	2B		sp|Q8NBS9-1|ENSG00000239264.8|TXNDC5|ENST00000379757.8|67378-HCT-15_RARE_RNA-N198S-and-67378-HCT-15_RARE_EXOME-N198S|198s|	TXNDC5_p.N198S	198	HCT-15	IA	TRUE	FALSE	TRUE	TRUE
SSGGPGAGLCLFPLDEVHAK	R	K	FALSE	FALSE	M	20	6	25	3	3	0	10C(57.0215)	O15031	O15031	2B	312	sp|O15031|ENSG00000196576.14|PLXNB2|ENST00000359337.8|196445-HCT-15_SNP_RNA-K318E-and-196445-HCT-15_SNP_EXOME-K318E|318e|	PLXNB2_p.K318E	318	HCT-15	IA	FALSE	TRUE	TRUE	TRUE
SSGSDESASRSALFAQINQGESITHALK	T	K	FALSE	FALSE	H	28	1	28	3	1	0	NA	Q01518	Q01518	2B		sp|Q01518-1|ENSG00000131236.16|CAP1|ENST00000372797.7|2315-HCT-15_RARE_RNA-S256A-and-2315-HCT-15_RARE_EXOME-S256A,2315-HCT-15_RARE_EXOME-I245S,2315-HCT-15_RARE_EXOME-C247G,2315-HCT-15_RARE_EXOME-Y249D|245s247g249d256a|	CAP1_p.S256A,I245S,C247G,Y249D	256245247249	HCT-15	IA	TRUE	FALSE	TRUE	TRUE
SSGSYESASRSSLFAQINQGESITHALK	T	K	FALSE	FALSE	H	28	1	28	3	2	0	NA	Q01518	Q01518	2B		sp|Q01518-1|ENSG00000131236.16|CAP1|ENST00000372797.7|2315-HCT-15_RARE_EXOME-I245S,2315-HCT-15_RARE_EXOME-C247G|245s247g|	CAP1_p.I245S,C247G	245247	HCT-15	IA	TRUE	FALSE	FALSE	TRUE
SSSSSSQPEHIAMLVSTAASPSLIK	K	K	FALSE	FALSE	E	25	7	31	2, 3	3	0	13M(15.9949)	P42166	P42166	2B		sp|P42166-1|ENSG00000120802.13|TMPO|ENST00000266732.8|119626-HCT-15_RARE_RNA-S301I-and-119626-HCT-15_RARE_EXOME-S301I|301i|	TMPO_p.S301I	301	HCT-15	IA	TRUE	FALSE	TRUE	TRUE
SSSSYHTWNTGTEGSFVER	K	R	FALSE	FALSE	V	19	9	27	3	2	0	NA	Q8TEQ6	Q8TEQ6	2B		sp|Q8TEQ6|ENSG00000082516.8|GEMIN5|ENST00000285873.7|61805-HCT-15_SNP_RNA-P1155S-and-61805-HCT-15_SNP_EXOME-P1155S|1155s|	GEMIN5_p.P1155S	1155	HCT-15	IA	FALSE	TRUE	TRUE	TRUE
STHSLAILGPENPK	K	K	FALSE	FALSE	L	14	1	14	3	1	0	NA	Q5JRX3	Q5JRX3	2B		sp|Q5JRX3-1|ENSG00000107959.15|PITRM1|ENST00000224949.8|99606-HCT-15_SNP_RNA-G1017S-and-99606-HCT-15_SNP_EXOME-G1017S|1017s|	PITRM1_p.G1017S	1017	HCT-15	IA	FALSE	TRUE	TRUE	TRUE
STIQNLQSFNPFADATKGDDLLPAGTEDYIHIR	M	R	FALSE	FALSE	L	33	2	34	3	2	0	N-term(42.0106)	O60739	O60739	2B		sp|O60739|ENSG00000114784.3|EIF1B|ENST00000232905.3|34138-HCT-15_RARE_EXOME-D11N|11n|	EIF1B_p.D11N	11	HCT-15	IA	TRUE	FALSE	FALSE	TRUE
SVGGSGVGSFGDNLVTR	R	R	FALSE	FALSE	S	17	6	22	2	4	0	NA	P02545	P02545	2B		sp|P02545-1|ENSG00000160789.19|LMNA|ENST00000368300.8|6152-HCT-15_RARE_RNA-G634V-and-6152-HCT-15_RARE_EXOME-G634V|634v|	LMNA_p.G634V	634	HCT-15	IA	TRUE	FALSE	TRUE	TRUE
SVQSGNLALAASAVAVDAGMAMAGQSPVLR	N	R	FALSE	FALSE	L	30	21	50	2	2	0	NA	P26599	P26599	2B		sp|P26599-1|ENSG00000011304.19|PTBP1|ENST00000349038.8|172261-HCT-15_RARE_RNA-A169V-and-172261-HCT-15_RARE_EXOME-A169V|169v|	PTBP1_p.A169V	169	HCT-15	IA	TRUE	FALSE	TRUE	TRUE
SVVSDVPEELDFLVPK	K	K	FALSE	FALSE	A	16	15	30	2	1	0	NA	Q14966	Q14966	2B		sp|Q14966-1|ENSG00000075292.18|ZNF638|ENST00000264447.8|20090-HCT-15_SNP_RNA-A1912V-and-20090-HCT-15_SNP_EXOME-A1912V|1912v|	ZNF638_p.A1912V	1912	HCT-15	IA	FALSE	TRUE	TRUE	TRUE
SWTAADMAAQTTK	R	K	FALSE	FALSE	R	13	1	13	2	5	0	NA	P04439	P04439	2B		sp|P04439|ENSG00000206503.12|HLA-A|ENST00000396634.5|63676-HCT-15_RARE_EXOME-I166T|166t|	HLA-A_p.I166T	166	HCT-15	IA	TRUE	FALSE	FALSE	TRUE
TATLQQAQEVHEK	K	K	FALSE	FALSE	L	13	18	30	2, 3	16	0	NA	P60174	P60174	2B		sp|P60174-3|ENSG00000111669.14|TPI1|ENST00000229270.8|115949-HCT-15_RARE_EXOME-P216L|216l|	TPI1_p.P216L	216	HCT-15	IA	TRUE	FALSE	FALSE	TRUE
TATLQQAQEVHEKLR	K	R	FALSE	FALSE	G	15	18	32	3, 4	9	0	NA	P60174	P60174	2B		sp|P60174-3|ENSG00000111669.14|TPI1|ENST00000229270.8|115949-HCT-15_RARE_EXOME-P216L|216l|	TPI1_p.P216L	216	HCT-15	IA	TRUE	FALSE	FALSE	TRUE
TDVPIYDGSWVEWYMR	K	R	FALSE	FALSE	A	16	1	16	2	1	0	NA	P25325	P25325	2B		sp|P25325-1|ENSG00000128309.16|MPST|ENST00000401419.7|193484-HCT-15_RARE_RNA-P267T-and-193484-HCT-15_RARE_EXOME-P267T|267t|	MPST_p.P267T	267	HCT-15	IA	TRUE	FALSE	TRUE	TRUE
TEEAILISLAALQPGLTQAGAR	R	R	FALSE	FALSE	H	22	1	22	2	3	0	NA	Q5T280	Q5T280	2B		sp|Q5T280|ENSG00000198917.12|C9orf114|ENST00000361256.9|95497-HCT-15_SNP_RNA-I369T-and-95497-HCT-15_SNP_EXOME-I369T|369t|	C9orf114_p.I369T	369	HCT-15	IA	FALSE	TRUE	TRUE	TRUE
TEGPSPALLEETPLEPAAGPK	K	K	FALSE	FALSE	A	21	8	28	2	2	0	NA	O95359	O95359	2B		sp|O95359-4|ENSG00000138162.18|TACC2|ENST00000369005.5|99233-HCT-15_SNP_RNA-V2197A-and-99233-HCT-15_SNP_EXOME-V2197A|2197a|	TACC2_p.V2197A	2197	HCT-15	IA	FALSE	TRUE	TRUE	TRUE
TGSSAQEAASGVALGEAPDHSYESLR	L	R	FALSE	FALSE	V	26	19	44	3	1	0	NA	Q13011	Q13011	2B		sp|Q13011|ENSG00000104823.8|ECH1|ENST00000221418.8|182284-HCT-15_SNP_RNA-E41A-and-182284-HCT-15_SNP_EXOME-E41A|41a|	ECH1_p.E41A	41	HCT-15	IA	FALSE	TRUE	TRUE	TRUE
TLDPFETMLK	K	K	FALSE	FALSE	S	10	1	10	2	2	0	NA	Q6UW02	Q6UW02	2B		sp|Q6UW02-1|ENSG00000119004.15|CYP20A1|ENST00000356079.8|23869-HCT-15_SNP_EXOME-S97L|97l|	CYP20A1_p.S97L	97	HCT-15	IA	FALSE	TRUE	FALSE	TRUE
TLPSWGHALLSQDFELLCR	K	R	FALSE	FALSE	D	19	14	32	3	1	0	18C(57.0215)	P08582	P08582	2B	257	sp|P08582-1|ENSG00000163975.11|MELTF|ENST00000296350.9|45110-HCT-15_RARE_RNA-Q246H-and-45110-HCT-15_RARE_EXOME-Q246H|246h|	MELTF_p.Q246H	246	HCT-15	IA	TRUE	FALSE	TRUE	TRUE
TLQALEFHTVPFQLLTR	K	R	FALSE	FALSE	Y	17	32	48	2, 3	3	0	NA	Q08380	Q08380	2B		sp|Q08380|ENSG00000108679.12|LGALS3BP|ENST00000262776.7|167811-HCT-15_RARE_RNA-A392T-and-167811-HCT-15_RARE_EXOME-A392T|392t|	LGALS3BP_p.A392T	392	HCT-15	IA	TRUE	FALSE	TRUE	TRUE
TMQGSEVVSVLK	K	K	FALSE	FALSE	S	12	1	12	2	6	0	2M(15.9949)	Q8WUM4	Q8WUM4	2B		sp|Q8WUM4-1|ENSG00000170248.13|PDCD6IP|ENST00000307296.7|33852-HCT-15_SNP_EXOME-N550S|550s|	PDCD6IP_p.N550S	550	HCT-15	IA	FALSE	TRUE	FALSE	TRUE
TNVFAPDFIAGVSPFVENDISSR	K	R	FALSE	FALSE	S	23	1	23	2	4	0	NA	Q9ULX3	Q9ULX3	2B		sp|Q9ULX3|ENSG00000141101.12|NOB1|ENST00000268802.9|154597-HCT-15_SNP_RNA-Y366F-and-154597-HCT-15_SNP_EXOME-Y366F|366f|	NOB1_p.Y366F	366	HCT-15	IA	FALSE	TRUE	TRUE	TRUE
TPTYGDLNHLVSATVSGVTTCLRFPGQLNADLR	P	R	FALSE	FALSE	K	33	1	33	3	1	0	NA	Q3ZCM7	Q3ZCM7	2B	239	sp|Q3ZCM7|ENSG00000261456.5|TUBB8|ENST00000568584.5|99548-HCT-15_RARE_EXOME-M233V|233v|	TUBB8_p.M233V	233	HCT-15	IA	TRUE	FALSE	FALSE	TRUE
TPVLFDVYEIK	K	K	FALSE	FALSE	E	11	10	20	2	6	0	NA	P50995	P50995	2B		sp|P50995-1|ENSG00000122359.17|ANXA11|ENST00000372231.7|101453-HCT-15_SNP_RNA-I278V-and-101453-HCT-15_SNP_EXOME-I278V|278v|	ANXA11_p.I278V	278	HCT-15	IA	FALSE	TRUE	TRUE	TRUE
TQLFDTLVNFFPDSMTHPK	R	K	FALSE	FALSE	G	19	23	41	3	1	0	NA	Q9UL63	Q9UL63	2B		sp|Q9UL63-1|ENSG00000128585.17|MKLN1|ENST00000352689.10|75615-HCT-15_RARE_RNA-P724H-and-75615-HCT-15_RARE_EXOME-P724H|724h|	MKLN1_p.P724H	724	HCT-15	IA	TRUE	FALSE	TRUE	TRUE
TQLVLGPGNSALLGCPIK	G	K	FALSE	FALSE	G	18	1	18	3	1	0	NA	Q8N6G6	Q8N6G6	2B	1418	sp|Q8N6G6-3|ENSG00000178031.16|ADAMTSL1|ENST00000380548.8|89606-HCT-15_SNP_EXOME-D1409G|1409g|	ADAMTSL1_p.D1409G	1409	HCT-15	IA	FALSE	TRUE	FALSE	TRUE
TQNKEESYDFFK	K	K	FALSE	FALSE	S	12	3	14	3	5	0	NA	Q9UDY2	Q9UDY2	2B		sp|Q9UDY2-1|ENSG00000119139.18|TJP2|ENST00000377245.8|90437-HCT-15_SNP_RNA-S1010F-and-90437-HCT-15_SNP_EXOME-S1010F|1010f|	TJP2_p.S1010F	1010	HCT-15	IA	FALSE	TRUE	TRUE	TRUE
TSELPPLK	K	K	FALSE	FALSE	N	8	18	25	2	2	0	NA	Q14914	Q14914	2B		sp|Q14914-1|ENSG00000106853.18|PTGR1|ENST00000309195.9|94852-HCT-15_SNP_RNA-A27S-and-94852-HCT-15_SNP_EXOME-A27S|27s|	PTGR1_p.A27S	27	HCT-15	IA	FALSE	TRUE	TRUE	TRUE
TSELPPLKNGEVLLEALFLTVDPYMR	K	R	FALSE	FALSE	V	26	18	43	3	1	0	NA	Q14914	Q14914	2B		sp|Q14914-1|ENSG00000106853.18|PTGR1|ENST00000309195.9|94852-HCT-15_SNP_RNA-A27S-and-94852-HCT-15_SNP_EXOME-A27S|27s|	PTGR1_p.A27S	27	HCT-15	IA	FALSE	TRUE	TRUE	TRUE
TSPATEAAPPPPEPVPAAQGPATVQSVEDFVPDDRLDR	G	R	FALSE	FALSE	S	38	12	49	3	1	0	NA	Q3YEC7	Q3YEC7	2B		sp|Q3YEC7-1|ENSG00000196642.18|RABL6|ENST00000311502.11|92549-HCT-15_SNP_RNA-E382Q-and-92549-HCT-15_SNP_EXOME-E382Q|382q|	RABL6_p.E382Q	382	HCT-15	IA	FALSE	TRUE	TRUE	TRUE
TTGIVMDSGDGVTHTVPIYEGYALPHAILCLDLAGR	R	R	FALSE	FALSE	D	36	32	67	3, 4	17	0	30C(57.0215), 6M(15.9949)	P60709	P60709	2B	177	sp|P60709|ENSG00000075624.14|ACTB|ENST00000646664.1|76882-HCT-15_RARE_RNA-R177C-and-76882-HCT-15_RARE_EXOME-R177C|177c|	ACTB_p.R177C	177	HCT-15	IA	TRUE	FALSE	TRUE	TRUE
TTGIVMDSGDGVTHTVPIYEGYALPHAILCLDLAGRDLTDYLMK	R	K	FALSE	FALSE	L	44	32	75	5	3	0	30C(57.0215), 43M(15.9949), 6M(15.9949)	P60709	P60709	2B	177	sp|P60709|ENSG00000075624.14|ACTB|ENST00000646664.1|76882-HCT-15_RARE_RNA-R177C-and-76882-HCT-15_RARE_EXOME-R177C|177c|	ACTB_p.R177C	177	HCT-15	IA	TRUE	FALSE	TRUE	TRUE
TVASPGVSVEEAVEQIDIGGVTLLR	K	R	FALSE	FALSE	A	25	14	38	2	10	0	NA	P31939	P31939	2B		sp|P31939-1|ENSG00000138363.14|ATIC|ENST00000236959.13|24162-HCT-15_SNP_RNA-T116S-and-24162-HCT-15_SNP_EXOME-T116S|116s|	ATIC_p.T116S	116	HCT-15	IA	FALSE	TRUE	TRUE	TRUE
TVEHGFPHQPSALGYSPSLHILAIGTR	K	R	FALSE	FALSE	S	27	11	37	5	1	0	NA	Q6P1M3	Q6P1M3	2B		sp|Q6P1M3-1|ENSG00000073350.13|LLGL2|ENST00000392550.7|160835-HCT-15_SNP_RNA-R45H-and-160835-HCT-15_SNP_EXOME-R45H|45h|	LLGL2_p.R45H	45	HCT-15	IA	FALSE	TRUE	TRUE	TRUE
VAGEDYKADCPPGNPAPTSNHGPDATEAEEDFVDPWTVQTSSAK	A	K	FALSE	FALSE	G	44	8	51	3	2	0	10C(57.0215)	P23381	P23381	2B	62	sp|P23381-1|ENSG00000140105.17|WARS|ENST00000392882.6|137493-HCT-15_RARE_RNA-A53V-and-137493-HCT-15_RARE_EXOME-A53V|53v|	WARS_p.A53V	53	HCT-15	IA	TRUE	FALSE	TRUE	TRUE
VAPEEHPVLLTEAPLNPKANH	R	H	FALSE	FALSE	E	21	1	21	3	1	0	NA	Q6S8J3	Q6S8J3	2B		sp|Q6S8J3-1|ENSG00000188219.14|POTEE|ENST00000356920.9|22005-HCT-15_RARE_EXOME-R816H,22005-HCT-15_RARE_RNA-I803V|803v816h|	POTEE_p.R816H,I803V	816803	HCT-15	IA	TRUE	FALSE	TRUE	TRUE
VDKGVVPLAGTNGETTIQGLDGLSER	K	R	FALSE	FALSE	C	26	3	28	3	16	0	NA	P04075	P04075	2B		sp|P04075-1|ENSG00000149925.18|ALDOA|ENST00000569545.5|147948-HCT-15_RARE_EXOME-T125I|125i|	ALDOA_p.T125I	125	HCT-15	IA	TRUE	FALSE	FALSE	TRUE
VEFATLQEALAHALMEK	R	K	FALSE	FALSE	E	17	1	17	2, 3	11	0	15M(15.9949)	Q14980	Q14980	2B		sp|Q14980-1|ENSG00000137497.17|NUMA1|ENST00000393695.7|113171-HCT-15_SNP_RNA-T1057M-and-113171-HCT-15_SNP_EXOME-T1057M|1057m|	NUMA1_p.T1057M	1057	HCT-15	IA	FALSE	TRUE	TRUE	TRUE
VFHFLVFQLNTTDLDSNEGVK	R	K	FALSE	FALSE	N	21	19	39	3	2	0	NA	Q9BZE1	Q9BZE1	2B		sp|Q9BZE1|ENSG00000116221.15|MRPL37|ENST00000360840.9|3266-HCT-15_SNP_RNA-C366S-and-3266-HCT-15_SNP_EXOME-C366S|366s|	MRPL37_p.C366S	366	HCT-15	IA	FALSE	TRUE	TRUE	TRUE
VLFPGCTPPAYLLDGLVR	R	R	FALSE	FALSE	L	18	6	23	2	1	0	6C(57.0215)	Q66K74	Q66K74	2B	435	sp|Q66K74-1|ENSG00000130479.10|MAP1S|ENST00000324096.8|174443-HCT-15_SNP_RNA-C440Y-and-174443-HCT-15_SNP_EXOME-C440Y|440y|	MAP1S_p.C440Y	440	HCT-15	IA	FALSE	TRUE	TRUE	TRUE
VLQQLTEEAALDEASGFNIPAEQASRPWTQPR	R	R	FALSE	FALSE	G	32	19	50	3	3	0	NA	Q96K21	Q96K21	2B		sp|Q96K21-1|ENSG00000166140.17|ZFYVE19|ENST00000355341.8|138875-HCT-15_SNP_RNA-S376A-and-138875-HCT-15_SNP_EXOME-S376A|376a|	ZFYVE19_p.S376A	376	HCT-15	IA	FALSE	TRUE	TRUE	TRUE
VMQVVDEKLPGLLGNFPGPFEEEMK	K	K	FALSE	FALSE	G	25	14	38	3	1	0	NA	Q13510	Q13510	2B		sp|Q13510-1|ENSG00000104763.18|ASAH1|ENST00000637790.1|85579-HCT-15_SNP_RNA-I93V-and-85579-HCT-15_SNP_EXOME-I93V|93v|	ASAH1_p.I93V	93	HCT-15	IA	FALSE	TRUE	TRUE	TRUE
VNLEEQLKETVEK	K	K	FALSE	FALSE	Y	13	9	21	2, 3	7	0	NA	Q9HAV7	Q9HAV7	2B		sp|Q9HAV7|ENSG00000109519.12|GRPEL1|ENST00000264954.4|49557-HCT-15_RARE_RNA-K66N-and-49557-HCT-15_RARE_EXOME-K66N|66n|	GRPEL1_p.K66N	66	HCT-15	IA	TRUE	FALSE	TRUE	TRUE
VPLASQGLGPGSTVLLVVDKCDEPLNILVR	R	R	FALSE	FALSE	N	30	3	32	3	1	0	21C(57.0215)	P05161	P05161	2B	78	sp|P05161|ENSG00000187608.8|ISG15|ENST00000379389.4|101-HCT-15_SNP_RNA-S83N-and-101-HCT-15_SNP_EXOME-S83N|83n|	ISG15_p.S83N	83	HCT-15	IA	FALSE	TRUE	TRUE	TRUE
VPTTTTMGFTVTPSSSPGTAR	K	R	FALSE	FALSE	T	21	1	21	2	1	0	NA	Q9HC84	Q9HC84	2B		sp|Q9HC84|ENSG00000117983.17|MUC5B|ENST00000529681.5|103098-HCT-15_SNP_EXOME-T3871M|3871m|	MUC5B_p.T3871M	3871	HCT-15	IA	FALSE	TRUE	FALSE	TRUE
VQALEQHNQLLETR	K	R	FALSE	FALSE	W	14	10	23	3	1	0	NA	Q6KB66	Q6KB66	2B		sp|Q6KB66-1|ENSG00000167767.13|KRT80|ENST00000394815.2|123662-HCT-15_SNP_RNA-R107H-and-123662-HCT-15_SNP_EXOME-R107H|107h|	KRT80_p.R107H	107	HCT-15	IA	FALSE	TRUE	TRUE	TRUE
VQSSYLHSLLEMGDLLK	K	K	FALSE	FALSE	K	17	1	17	3	1	0	NA	Q14CX7	Q14CX7	2B		sp|Q14CX7-1|ENSG00000111300.9|NAA25|ENST00000261745.8|126112-HCT-15_RARE_RNA-E958D-and-126112-HCT-15_RARE_EXOME-E958D|958d|	NAA25_p.E958D	958	HCT-15	IA	TRUE	FALSE	TRUE	TRUE
VQVLAAQLLSEMK	R	K	FALSE	FALSE	L	13	11	23	2	3	0	NA	Q6P9B6	Q6P9B6	2B		sp|Q6P9B6|ENSG00000140950.15|TLDC1|ENST00000343629.10|155273-HCT-15_SNP_RNA-D172E-and-155273-HCT-15_SNP_EXOME-D172E|172e|	TLDC1_p.D172E	172	HCT-15	IA	FALSE	TRUE	TRUE	TRUE
VSHLPLVEELR	R	R	FALSE	FALSE	S	11	1	11	3	8	0	NA	P49736	P49736	2B		sp|P49736|ENSG00000073111.13|MCM2|ENST00000265056.11|36591-HCT-15_RARE_RNA-I285V-and-36591-HCT-15_RARE_EXOME-I285V|285v|	MCM2_p.I285V	285	HCT-15	IA	TRUE	FALSE	TRUE	TRUE
VSIAELAQASNSLITWGR	R	R	FALSE	FALSE	E	18	5	22	2	6	0	NA	Q96HY6	Q96HY6	2B		sp|Q96HY6-1|ENSG00000198171.12|DDRGK1|ENST00000354488.7|187610-HCT-15_SNP_RNA-A303T-and-187610-HCT-15_SNP_EXOME-A303T|303t|	DDRGK1_p.A303T	303	HCT-15	IA	FALSE	TRUE	TRUE	TRUE
VSLGGEPPSEAQPHPEVPLGGLSEAADSLR	R	R	FALSE	FALSE	E	30	5	34	3	1	0	NA	Q9BVQ7	Q9BVQ7	2B		sp|Q9BVQ7-1|ENSG00000171763.18|SPATA5L1|ENST00000305560.10|139325-HCT-15_RARE_EXOME-Q197H|197h|	SPATA5L1_p.Q197H	197	HCT-15	IA	TRUE	FALSE	FALSE	TRUE
VTENIPQIISFIEGIFAR	R	R	FALSE	FALSE	G	18	12	29	2	2	0	NA	Q9HA77	Q9HA77	2B		sp|Q9HA77|ENSG00000134905.16|CARS2|ENST00000257347.8|130340-HCT-15_SNP_RNA-I180F-and-130340-HCT-15_SNP_EXOME-I180F|180f|	CARS2_p.I180F	180	HCT-15	IA	FALSE	TRUE	TRUE	TRUE
VVDNTTAKEFAGSLGIPFLETSAK	K	K	FALSE	FALSE	N	24	4	27	3	3	0	NA	Q9H0U4	Q9H0U4	2B		sp|Q9H0U4|ENSG00000174903.15|RAB1B|ENST00000311481.10|106330-HCT-15_RARE_RNA-D141G-and-106330-HCT-15_RARE_EXOME-D141G|141g|	RAB1B_p.D141G	141	HCT-15	IA	TRUE	FALSE	TRUE	TRUE
WGQIILK	R	K	FALSE	FALSE	N	7	5	11	2	1	0	NA	Q9H4A4	Q9H4A4	2B		sp|Q9H4A4|ENSG00000176393.10|RNPEP|ENST00000295640.8|7673-HCT-15_SNP_RNA-V579I-and-7673-HCT-15_SNP_EXOME-V579I|579i|	RNPEP_p.V579I	579	HCT-15	IA	FALSE	TRUE	TRUE	TRUE
WLSTSIPEAQWHSSLSR	R	R	FALSE	FALSE	T	17	6	22	2, 3	5	0	NA	P49327	P49327	2B		sp|P49327|ENSG00000169710.8|FASN|ENST00000306749.3|168265-HCT-15_SNP_RNA-A727S-and-168265-HCT-15_SNP_EXOME-A727S|727s|	FASN_p.A727S	727	HCT-15	IA	FALSE	TRUE	TRUE	TRUE
YASICQQNGIVPIVEPEILPDGGHDLK	R	K	FALSE	FALSE	R	27	1	27	3	11	0	5C(57.0215)	P04075	P04075	2B	178	sp|P04075-1|ENSG00000149925.18|ALDOA|ENST00000569545.5|147948-HCT-15_RARE_RNA-D196G-and-147948-HCT-15_RARE_EXOME-D196G|196g|	ALDOA_p.D196G	196	HCT-15	IA	TRUE	FALSE	TRUE	TRUE
YASICQQNGIVPIVEPEILPDGGHDLKR	R	R	FALSE	FALSE	C	28	1	28	3, 4	6	0	5C(57.0215)	P04075	P04075	2B	178	sp|P04075-1|ENSG00000149925.18|ALDOA|ENST00000569545.5|147948-HCT-15_RARE_RNA-D196G-and-147948-HCT-15_RARE_EXOME-D196G|196g|	ALDOA_p.D196G	196	HCT-15	IA	TRUE	FALSE	TRUE	TRUE
YELTEISNVDVETQSGK	R	K	FALSE	FALSE	T	17	6	22	2	2	0	NA	Q09666	Q09666	2B		sp|Q09666-1|ENSG00000124942.13|AHNAK|ENST00000378024.8|112027-HCT-15_RARE_RNA-H187Y-and-112027-HCT-15_RARE_EXOME-H187Y|187y|	AHNAK_p.H187Y	187	HCT-15	IA	TRUE	FALSE	TRUE	TRUE
YFVEAGDMAVR	K	R	FALSE	FALSE	R	11	24	34	2	1	0	NA	P17987	P17987	2B		sp|P17987|ENSG00000120438.11|TCP1|ENST00000321394.11|71383-HCT-15_RARE_RNA-A305D-and-71383-HCT-15_RARE_EXOME-A305D|305d|	TCP1_p.A305D	305	HCT-15	IA	TRUE	FALSE	TRUE	TRUE
YGMTEIGMALSGPLTTAMR	R	R	FALSE	FALSE	L	19	13	31	2	4	0	3M(15.9949)	Q4G176	Q4G176	2B		sp|Q4G176|ENSG00000176715.15|ACSF3|ENST00000317447.8|150719-HCT-15_SNP_RNA-V372M-and-150719-HCT-15_SNP_EXOME-V372M|372m|	ACSF3_p.V372M	372	HCT-15	IA	FALSE	TRUE	TRUE	TRUE
YIELFLNSTPGGGYGMGGSGMGGYGR	R	R	FALSE	FALSE	D	26	1	26	2	5	0	16M(15.9949), 21M(15.9949)	P31942	P31942	2B		sp|P31942-1|ENSG00000096746.17|HNRNPH3|ENST00000265866.11|97564-HCT-15_RARE_RNA-S275Y-and-97564-HCT-15_RARE_EXOME-S275Y|275y|	HNRNPH3_p.S275Y	275	HCT-15	IA	TRUE	FALSE	TRUE	TRUE
YLENGKDMLER	R	R	FALSE	FALSE	A	11	1	11	3	1	0	NA	P01889	P01889	2B		sp|P01889|ENSG00000234745.10|HLA-B|ENST00000412585.6|68124-HCT-15_SNP_EXOME-K202M|202m|	HLA-B_p.K202M	202	HCT-15	IA	FALSE	TRUE	FALSE	TRUE
YSLIDPSSAPELLR	R	R	FALSE	FALSE	L	14	10	23	2	2	0	NA	Q9UDT6	Q9UDT6	2B		sp|Q9UDT6-1|ENSG00000106665.15|CLIP2|ENST00000395060.5|73639-HCT-15_SNP_RNA-R977P-and-73639-HCT-15_SNP_EXOME-R977P|977p|	CLIP2_p.R977P	977	HCT-15	IA	FALSE	TRUE	TRUE	TRUE
YTCHVQHEGLPEPLTLR	R	R	FALSE	FALSE	W	17	1	17	4	1	0	3C(57.0215)	P01889	P01889	2B	283	sp|P01889|ENSG00000234745.10|HLA-B|ENST00000412585.6|68124-HCT-15_RARE_RNA-K292E|292e|;sp|P17693-1|ENSG00000204632.11|HLA-G|ENST00000428701.5|63665-HCT-15_SNP_RNA-M295T|295t|	HLA-B_p.K292E;HLA-G_p.M295T	292;295	HCT-15	IA	TRUE	TRUE	TRUE	FALSE
YTLPPGVDPAQVSSSLSPEGTLTVEAPMPK	K	K	FALSE	FALSE	L	30	8	37	2	6	0	NA	P04792	P04792	2B		sp|P04792|ENSG00000106211.8|HSPB1|ENST00000248553.6|73783-HCT-15_RARE_RNA-T151A-and-73783-HCT-15_RARE_EXOME-T151A|151a|	HSPB1_p.T151A	151	HCT-15	IA	TRUE	FALSE	TRUE	TRUE
YVQSAQSQIHNTCWAMMGLMAVR	R	R	FALSE	FALSE	H	23	21	43	3	1	0	13C(57.0215)	P48449	P48449	2B	653	sp|P48449-1|ENSG00000160285.14|LSS|ENST00000356396.8|191940-HCT-15_SNP_RNA-L642V-and-191940-HCT-15_SNP_EXOME-L642V|642v|	LSS_p.L642V	642	HCT-15	IA	FALSE	TRUE	TRUE	TRUE
AAAAAAAAAPAAAATAATTAATTAATAAQ	K	Q	FALSE	FALSE	-	29	6	34	2	6	0	NA	P37108	P37108	3A		sp|P37108|ENSG00000140319.10|SRP14|ENST00000267884.10|142380-HCT-15_SNP_RNA-P124A-and-142380-HCT-15_SNP_EXOME-P124A|124a|	SRP14_p.P124A	124	HCT-15	CAM	FALSE	TRUE	TRUE	TRUE
AAAVRPDLAQLMNSSGSHK	M	K	FALSE	FALSE	D	19	2	20	3	1	0	N-term(42.0106)	Q9BT78	Q9BT78	3A		sp|Q9BT78-1|ENSG00000138663.8|COPS4|ENST00000264389.6|47267-HCT-15_RARE_RNA-Q7P-and-47267-HCT-15_RARE_EXOME-Q7P|7p|	COPS4_p.Q7P	7	HCT-15	CAM	TRUE	FALSE	TRUE	TRUE
AAGAAEAAVAAVEEVGSAGHFEELLR	M	R	FALSE	FALSE	L	26	1	26	2, 3	19	0	N-term(42.0106)	O76003	O76003	3A		sp|O76003|ENSG00000108010.11|GLRX3|ENST00000331244.9|99420-HCT-15_SNP_RNA-Q21H-and-99420-HCT-15_SNP_EXOME-Q21H|21h|	GLRX3_p.Q21H	21	HCT-15	CAM	FALSE	TRUE	TRUE	TRUE
AALVDLEPC	R	C	FALSE	TRUE	T	9	7	15	2	1	0	9C(56.0374)	Q9BUF5	Q9BUF5	3A	71	sp|Q9BUF5|ENSG00000176014.12|TUBB6|ENST00000317702.9|168837-HCT-15_RARE_RNA-G71C-and-168837-HCT-15_RARE_EXOME-G71C|71c|	TUBB6_p.G71C	71	HCT-15	CAM	TRUE	FALSE	TRUE	TRUE
AAVPAPEEEMDECEQALAAEPK	K	K	FALSE	FALSE	A	22	8	29	2	6	0	13C(56.0374)	P26641	P26641	3A	266	sp|P26641-1|ENSG00000254772.9|EEF1G|ENST00000329251.4|112031-HCT-15_RARE_RNA-A256V-and-112031-HCT-15_RARE_EXOME-A256V|256v|	EEF1G_p.A256V	256	HCT-15	CAM	TRUE	FALSE	TRUE	TRUE
AEAMDVDTPSGTNSGAGKK	M	K	FALSE	FALSE	R	19	2	20	2	2	0	N-term(42.0106)	P62877	P62877	3A		sp|P62877|ENSG00000100387.8|RBX1|ENST00000216225.8|193858-HCT-15_RARE_RNA-A3E-and-193858-HCT-15_RARE_EXOME-A3E|3e|	RBX1_p.A3E	3	HCT-15	CAM	TRUE	FALSE	TRUE	TRUE
AEEPGDGPAEEWLGR	K	R	FALSE	FALSE	A	15	18	32	2	1	0	NA	Q587I9	Q587I9	3A		sp|Q587I9|ENSG00000173349.5|SFT2D3|ENST00000310981.5|21862-HCT-15_SNP_EXOME-R38G|38g|	SFT2D3_p.R38G	38	HCT-15	CAM	FALSE	TRUE	FALSE	TRUE
AENTEGDLNSNLPHAPYHTGDPQLDTAIGQWLR	M	R	FALSE	FALSE	W	33	2	34	3	3	0	N-term(42.0106)	Q6PCE3	Q6PCE3	3A		sp|Q6PCE3|ENSG00000165434.7|PGM2L1|ENST00000298198.4|113409-HCT-15_SNP_EXOME-L14P|14p|	PGM2L1_p.L14P	14	HCT-15	CAM	FALSE	TRUE	FALSE	TRUE
AEVTGYFPLGTWYDLQTVPIEALGSLPPPPAAPR	K	R	FALSE	FALSE	E	34	1	34	3	2	0	NA	P10253	P10253	3A		sp|P10253|ENSG00000171298.12|GAA|ENST00000390015.7|161319-HCT-15_SNP_EXOME-V780I|780i|	GAA_p.V780I	780	HCT-15	CAM	FALSE	TRUE	FALSE	TRUE
AFSEYLGTDQSK	K	K	FALSE	FALSE	W	12	22	33	2	1	0	NA	P10768	P10768	3A		sp|P10768|ENSG00000139684.13|ESD|ENST00000378720.7|129610-HCT-15_SNP_RNA-G190E-and-129610-HCT-15_SNP_EXOME-G190E|190e|	ESD_p.G190E	190	HCT-15	CAM	FALSE	TRUE	TRUE	TRUE
AGALMMPLVDQLENR	R	R	FALSE	FALSE	L	15	1	15	2	1	0	NA	Q9H583	Q9H583	3A		sp|Q9H583|ENSG00000119285.10|HEATR1|ENST00000366582.7|17722-HCT-15_SNP_RNA-E2017G-and-17722-HCT-15_SNP_EXOME-E2017G|2017g|	HEATR1_p.E2017G	2017	HCT-15	CAM	FALSE	TRUE	TRUE	TRUE
AGHQSAAASNLSGLSLQEAQQILNVSK	R	K	FALSE	FALSE	L	27	5	31	3	5	0	NA	Q9Y3D7	Q9Y3D7	3A		sp|Q9Y3D7|ENSG00000217930.7|PAM16|ENST00000318059.7|151848-HCT-15_SNP_RNA-R44Q-and-151848-HCT-15_SNP_EXOME-R44Q|44q|	PAM16_p.R44Q	44	HCT-15	CAM	FALSE	TRUE	TRUE	TRUE
AGMAAVADPHSLLDPNTIYQELQK	K	K	FALSE	FALSE	V	24	23	46	3	2	0	NA	Q6PCB7	Q6PCB7	3A		sp|Q6PCB7-1|ENSG00000130304.16|SLC27A1|ENST00000252595.11|174408-HCT-15_RARE_RNA-A567T-and-174408-HCT-15_RARE_EXOME-A567T|567t|	SLC27A1_p.A567T	567	HCT-15	CAM	TRUE	FALSE	TRUE	TRUE
AGTNGETTIQGLDGLSER	L	R	FALSE	FALSE	C	18	11	28	2	1	0	NA	P04075	P04075	3A		sp|P04075-1|ENSG00000149925.18|ALDOA|ENST00000569545.5|147948-HCT-15_RARE_EXOME-T125I|125i|	ALDOA_p.T125I	125	HCT-15	CAM	TRUE	FALSE	FALSE	TRUE
AGVAAPATQVVQVTLQSVQR	K	R	FALSE	FALSE	R	20	5	24	2	1	0	NA	Q15149	Q15149	3A		sp|Q15149-1|ENSG00000178209.14|PLEC|ENST00000322810.8|89058-HCT-15_SNP_RNA-A641V-and-89058-HCT-15_SNP_EXOME-A641V|641v|	PLEC_p.A641V	641	HCT-15	CAM	FALSE	TRUE	TRUE	TRUE
AHAFVVQQK	K	K	FALSE	FALSE	E	9	1	9	2	3	0	NA	Q15149	Q15149	3A		sp|Q15149-1|ENSG00000178209.14|PLEC|ENST00000322810.8|89058-HCT-15_SNP_RNA-A2194V-and-89058-HCT-15_SNP_EXOME-A2194V|2194v|	PLEC_p.A2194V	2194	HCT-15	CAM	FALSE	TRUE	TRUE	TRUE
AHGAPINSLLLVDENVLATGDDTGGIR	K	R	FALSE	FALSE	L	27	1	27	3	2	0	NA	Q9H6Y2	Q9H6Y2	3A		sp|Q9H6Y2-1|ENSG00000120314.18|WDR55|ENST00000358337.9|56558-HCT-15_SNP_RNA-C151R-and-56558-HCT-15_SNP_EXOME-C151R|151r|	WDR55_p.C151R	151	HCT-15	CAM	FALSE	TRUE	TRUE	TRUE
AIVSQQFVEMTR	K	R	FALSE	FALSE	T	12	6	17	2	2	0	NA	P48444	P48444	3A		sp|P48444-1|ENSG00000095139.13|ARCN1|ENST00000264028.4|108466-HCT-15_SNP_RNA-R19Q-and-108466-HCT-15_SNP_EXOME-R19Q|19q|	ARCN1_p.R19Q	19	HCT-15	CAM	FALSE	TRUE	TRUE	TRUE
ALLNAESLPTHR	R	R	FALSE	FALSE	K	12	7	18	2, 3	4	0	NA	Q9NVH0	Q9NVH0	3A		sp|Q9NVH0-1|ENSG00000081177.18|EXD2|ENST00000409018.7|132538-HCT-15_SNP_RNA-Q518H-and-132538-HCT-15_SNP_EXOME-Q518H|518h|	EXD2_p.Q518H	518	HCT-15	CAM	FALSE	TRUE	TRUE	TRUE
ALSSSTQASIEIDSLYEGIDFYTSITR	R	R	FALSE	FALSE	A	27	1	27	2	13	0	NA	P11142	P11142	3A		sp|P11142-1|ENSG00000109971.13|HSPA8|ENST00000532636.5|115059-HCT-15_RARE_RNA-T273A-and-115059-HCT-15_RARE_EXOME-T273A|273a|	HSPA8_p.T273A	273	HCT-15	CAM	TRUE	FALSE	TRUE	TRUE
ALTAQLPVLPR	R	R	FALSE	FALSE	S	11	21	31	2	2	0	NA	Q96GK7	Q96GK7	3A		sp|Q96GK7|ENSG00000115042.9|FAHD2A|ENST00000447036.5|20778-HCT-15_RARE_EXOME-A85T|85t|	FAHD2A_p.A85T	85	HCT-15	CAM	TRUE	FALSE	FALSE	TRUE
AMAAMPQDVVR	R	R	FALSE	FALSE	Q	11	1	11	2	1	0	NA	Q969V3	Q969V3	3A		sp|Q969V3-1|ENSG00000125912.10|NCLN|ENST00000246117.8|172703-HCT-15_SNP_RNA-V119M-and-172703-HCT-15_SNP_EXOME-V119M|119m|	NCLN_p.V119M	119	HCT-15	CAM	FALSE	TRUE	TRUE	TRUE
AMQALLQIQQGLQTLQTEAPGLVPSLGSFGMSR	R	R	FALSE	FALSE	T	33	26	58	3	1	0	2M(15.9949)	Q9NRR5	Q9NRR5	3A		sp|Q9NRR5-1|ENSG00000160803.7|UBQLN4|ENST00000368309.3|15212-HCT-15_SNP_RNA-I495M-and-15212-HCT-15_SNP_EXOME-I495M|495m|	UBQLN4_p.I495M	495	HCT-15	CAM	FALSE	TRUE	TRUE	TRUE
ANLYPVASLFTQK	K	K	FALSE	FALSE	R	13	7	19	2	1	0	NA	Q8NCN5	Q8NCN5	3A		sp|Q8NCN5-1|ENSG00000090857.13|PDPR|ENST00000288050.8|149914-HCT-15_RARE_RNA-K854N-and-149914-HCT-15_RARE_EXOME-K854N|854n|	PDPR_p.K854N	854	HCT-15	CAM	TRUE	FALSE	TRUE	TRUE
APHNPAPPMSTVIHIR	G	R	FALSE	FALSE	S	16	1	16	3, 4	4	0	NA	Q01629	Q01629	3A		sp|Q01629|ENSG00000185201.16|IFITM2|ENST00000616316.1|102873-HCT-15_SNP_RNA-V33A-and-102873-HCT-15_SNP_EXOME-V33A|33a|	IFITM2_p.V33A	33	HCT-15	CAM	FALSE	TRUE	TRUE	TRUE
APPMPGPVPEAAQPFLFTPR	K	R	FALSE	FALSE	G	20	1	20	2	2	0	NA	Q7Z406	Q7Z406	3A		sp|Q7Z406-1|ENSG00000105357.16|MYH14|ENST00000376970.6|177517-HCT-15_RARE_RNA-R16M-and-177517-HCT-15_RARE_EXOME-R16M|16m|	MYH14_p.R16M	16	HCT-15	CAM	TRUE	FALSE	TRUE	TRUE
APPWVPAMGFTLAPSMGC	M	C	FALSE	TRUE	F	18	1	18	2	4	0	16M(15.9949), 18C(56.0374)	P30536	P30536	3A	19	sp|P30536-1|ENSG00000100300.17|TSPO|ENST00000337554.7|194007-HCT-15_RARE_RNA-L17M-and-194007-HCT-15_RARE_EXOME-L17M|17m|	TSPO_p.L17M	17	HCT-15	CAM	TRUE	FALSE	TRUE	TRUE
APSPLYSVEFSEEPFGVIVHR	R	R	FALSE	FALSE	Q	21	17	37	3	5	0	NA	P10253	P10253	3A		sp|P10253|ENSG00000171298.12|GAA|ENST00000390015.7|161319-HCT-15_SNP_RNA-R223H-and-161319-HCT-15_SNP_EXOME-R223H|223h|	GAA_p.R223H	223	HCT-15	CAM	FALSE	TRUE	TRUE	TRUE
AQAALQAVNSVQSGNLALAASAVAVDAGMAMAGQSPVLR	R	R	FALSE	FALSE	L	39	12	50	3, 4	28	0	29M(15.9949), 31M(15.9949)	P26599	P26599	3A		sp|P26599-1|ENSG00000011304.19|PTBP1|ENST00000349038.8|172261-HCT-15_RARE_RNA-A169V-and-172261-HCT-15_RARE_EXOME-A169V|169v|	PTBP1_p.A169V	169	HCT-15	CAM	TRUE	FALSE	TRUE	TRUE
AQEALDAVSTLEEGHTQYLTSLADASALVAALTR	R	R	FALSE	FALSE	F	34	14	47	3	3	0	NA	O75146	O75146	3A		sp|O75146-1|ENSG00000130787.13|HIP1R|ENST00000253083.8|120763-HCT-15_SNP_RNA-A676T-and-120763-HCT-15_SNP_EXOME-A676T|676t|	HIP1R_p.A676T	676	HCT-15	CAM	FALSE	TRUE	TRUE	TRUE
AQEALLQLSQALSLMETVK	R	K	FALSE	FALSE	Q	19	1	19	2	16	0	15M(15.9949)	O60664	O60664	3A		sp|O60664-1|ENSG00000105355.8|PLIN3|ENST00000221957.8|179418-HCT-15_SNP_RNA-V275A-and-179418-HCT-15_SNP_EXOME-V275A|275a|	PLIN3_p.V275A	275	HCT-15	CAM	FALSE	TRUE	TRUE	TRUE
AQVSSSLSPEGTLTVEAPMPK	P	K	FALSE	FALSE	L	21	17	37	2	1	0	NA	P04792	P04792	3A		sp|P04792|ENSG00000106211.8|HSPB1|ENST00000248553.6|73783-HCT-15_RARE_RNA-T151A-and-73783-HCT-15_RARE_EXOME-T151A|151a|	HSPB1_p.T151A	151	HCT-15	CAM	TRUE	FALSE	TRUE	TRUE
ASEDPLLNLVSPLGCEVDVEEGDVGR	R	R	FALSE	FALSE	D	26	18	43	3	2	0	15C(56.0374)	Q8NDH3	Q8NDH3	3A	504	sp|Q8NDH3-1|ENSG00000215440.11|NPEPL1|ENST00000356091.10|186970-HCT-15_RARE_RNA-L513V-and-186970-HCT-15_RARE_EXOME-L513V|513v|	NPEPL1_p.L513V	513	HCT-15	CAM	TRUE	FALSE	TRUE	TRUE
ASLGSLEGEAEAETSSPK	K	K	FALSE	FALSE	G	18	1	18	2	1	0	NA	Q09666	Q09666	3A		sp|Q09666-1|ENSG00000124942.13|AHNAK|ENST00000378024.8|112027-HCT-15_RARE_RNA-A5761T-and-112027-HCT-15_RARE_EXOME-A5761T|5761t|	AHNAK_p.A5761T	5761	HCT-15	CAM	TRUE	FALSE	TRUE	TRUE
ASPPFPLISNTQDLAQEVQTVLKPVHHK	K	K	FALSE	FALSE	E	28	14	41	5	1	0	NA	Q8N3R9	Q8N3R9	3A		sp|Q8N3R9-1|ENSG00000072415.8|MPP5|ENST00000261681.8|132461-HCT-15_RARE_RNA-A186T-and-132461-HCT-15_RARE_EXOME-A186T|186t|	MPP5_p.A186T	186	HCT-15	CAM	TRUE	FALSE	TRUE	TRUE
ASSSILINESEPITNIQIR	K	R	FALSE	FALSE	L	19	1	19	2	2	0	NA	Q9UNZ2	Q9UNZ2	3A		sp|Q9UNZ2-1|ENSG00000088833.17|NSFL1C|ENST00000216879.8|187508-HCT-15_SNP_RNA-D290N-and-187508-HCT-15_SNP_EXOME-D290N,187508-HCT-15_RARE_RNA-T295I-and-187508-HCT-15_RARE_EXOME-T295I|290n295i|	NSFL1C_p.D290N,T295I	290295	HCT-15	CAM	TRUE	TRUE	TRUE	TRUE
AVEVATVVIQPTVLR	K	R	FALSE	FALSE	A	15	22	36	2	4	0	NA	Q9P2B2	Q9P2B2	3A		sp|Q9P2B2|ENSG00000134247.9|PTGFRN|ENST00000393203.2|5014-HCT-15_SNP_EXOME-S277T|277t|	PTGFRN_p.S277T	277	HCT-15	CAM	FALSE	TRUE	FALSE	TRUE
AVNSVQSGNLALAASAVAVDAGMAMAGQSPVLR	Q	R	FALSE	FALSE	L	33	18	50	2, 3	4	0	NA	P26599	P26599	3A		sp|P26599-1|ENSG00000011304.19|PTBP1|ENST00000349038.8|172261-HCT-15_RARE_RNA-A169V-and-172261-HCT-15_RARE_EXOME-A169V|169v|	PTBP1_p.A169V	169	HCT-15	CAM	TRUE	FALSE	TRUE	TRUE
AVSMLEADHMPPSR	R	R	FALSE	FALSE	L	14	22	35	3	1	0	NA	Q99959	Q99959	3A		sp|Q99959-1|ENSG00000057294.14|PKP2|ENST00000070846.10|122833-HCT-15_SNP_RNA-L366P-and-122833-HCT-15_SNP_EXOME-L366P|366p|	PKP2_p.L366P	366	HCT-15	CAM	FALSE	TRUE	TRUE	TRUE
AYNYIAQEVDDYHAFQTLTHIYNK	R	K	FALSE	FALSE	V	24	28	51	3, 4	8	0	NA	Q9NYU2	Q9NYU2	3A		sp|Q9NYU2-1|ENSG00000136731.12|UGGT1|ENST00000259253.10|21872-HCT-15_SNP_RNA-V558I-and-21872-HCT-15_SNP_EXOME-V558I|558i|	UGGT1_p.V558I	558	HCT-15	CAM	FALSE	TRUE	TRUE	TRUE
CHTAGIRVIMVTGDHPITAK	K	K	FALSE	FALSE	A	20	12	31	3	2	0	10M(15.9949)	P20648	P20648	3A	617	sp|P20648|ENSG00000105675.8|ATP4A|ENST00000262623.3|181857-HCT-15_RARE_EXOME-R618H|618h|	ATP4A_p.R618H	618	HCT-15	CAM	TRUE	FALSE	FALSE	TRUE
CNLHMNGNIITSDQPILLR	K	R	FALSE	FALSE	L	19	11	29	3	1	0	1C(56.0374)	Q9BY77	Q9BY77	3A	346	sp|Q9BY77-1|ENSG00000100227.17|POLDIP3|ENST00000252115.9|196176-HCT-15_RARE_RNA-V354I-and-196176-HCT-15_RARE_EXOME-V354I|354i|	POLDIP3_p.V354I	354	HCT-15	CAM	TRUE	FALSE	TRUE	TRUE
DATGLECKPQPLHK	K	K	FALSE	FALSE	T	14	1	14	3	3	0	7C(56.0374)	Q9BXP5	Q9BXP5	3A	412	sp|Q9BXP5-1|ENSG00000087087.19|SRRT|ENST00000611405.4|74711-HCT-15_RARE_RNA-R415Q-and-74711-HCT-15_RARE_EXOME-R415Q,74711-HCT-15_RARE_RNA-A408T-and-74711-HCT-15_RARE_EXOME-A408T|408t415q|	SRRT_p.R415Q,A408T	415408	HCT-15	CAM	TRUE	FALSE	TRUE	TRUE
DDHDPVDKIALQK	F	K	FALSE	FALSE	Y	13	12	24	2, 3	4	0	NA	P22626	P22626	3A		sp|P22626-1|ENSG00000122566.20|HNRNPA2B1|ENST00000354667.8|77381-HCT-15_RARE_EXOME-V170A|170a|	HNRNPA2B1_p.V170A	170	HCT-15	CAM	TRUE	FALSE	FALSE	TRUE
DELNQALKIFEEDPAVGAIVLTGGDK	L	K	FALSE	FALSE	A	26	1	26	3	4	0	NA	P30084	P30084	3A		sp|P30084|ENSG00000127884.4|ECHS1|ENST00000368547.3|102799-HCT-15_SNP_RNA-T75I-and-102799-HCT-15_SNP_EXOME-T75I|75i|	ECHS1_p.T75I	75	HCT-15	CAM	FALSE	TRUE	TRUE	TRUE
DEPLHALYDNVEK	R	K	FALSE	FALSE	L	13	8	20	3	2	0	NA	P08243	P08243	3A		sp|P08243-1|ENSG00000070669.16|ASNS|ENST00000175506.8|79376-HCT-15_SNP_RNA-V210E-and-79376-HCT-15_SNP_EXOME-V210E|210e|	ASNS_p.V210E	210	HCT-15	CAM	FALSE	TRUE	TRUE	TRUE
DFQTLENWMLQTLNEEPVTPEPEVEPPSTPELK	R	K	FALSE	FALSE	Q	33	8	40	3	3	0	NA	Q8NBS9	Q8NBS9	3A		sp|Q8NBS9-1|ENSG00000239264.8|TXNDC5|ENST00000379757.8|67378-HCT-15_RARE_RNA-A184T-and-67378-HCT-15_RARE_EXOME-A184T|184t|	TXNDC5_p.A184T	184	HCT-15	CAM	TRUE	FALSE	TRUE	TRUE
DFVSEQLTSLLVNEVQLPALGENK	K	K	FALSE	FALSE	K	24	18	41	2	3	0	NA	P54136	P54136	3A		sp|P54136-1|ENSG00000113643.8|RARS|ENST00000231572.7|57480-HCT-15_RARE_RNA-G182E-and-57480-HCT-15_RARE_EXOME-G182E|182e|	RARS_p.G182E	182	HCT-15	CAM	TRUE	FALSE	TRUE	TRUE
DFVSEQLTSLLVNEVQLPALGENKK	K	K	FALSE	FALSE	V	25	18	42	3	5	0	NA	P54136	P54136	3A		sp|P54136-1|ENSG00000113643.8|RARS|ENST00000231572.7|57480-HCT-15_RARE_RNA-G182E-and-57480-HCT-15_RARE_EXOME-G182E|182e|	RARS_p.G182E	182	HCT-15	CAM	TRUE	FALSE	TRUE	TRUE
DFYVVEPLAFEGTPEQK	K	K	FALSE	FALSE	A	17	11	27	2	1	0	NA	P06865	P06865	3A		sp|P06865-1|ENSG00000213614.9|HEXA|ENST00000268097.9|144124-HCT-15_SNP_RNA-I436V-and-144124-HCT-15_SNP_EXOME-I436V|436v|	HEXA_p.I436V	436	HCT-15	CAM	FALSE	TRUE	TRUE	TRUE
DGEDQTQDTELVETMPAGDGTFQK	R	K	FALSE	FALSE	W	24	1	24	2	3	0	NA	P10321	P10321	3A		sp|P10321|ENSG00000204525.16|HLA-C|ENST00000376228.9|68111-HCT-15_SNP_RNA-R258M-and-68111-HCT-15_SNP_EXOME-R258M|258m|	HLA-C_p.R258M	258	HCT-15	CAM	FALSE	TRUE	TRUE	TRUE
DGQELEPQVGEQLLQLWER	R	R	FALSE	FALSE	L	19	9	27	2	3	0	NA	Q9H6S0	Q9H6S0	3A		sp|Q9H6S0|ENSG00000047188.15|YTHDC2|ENST00000161863.8|55633-HCT-15_SNP_RNA-L1409Q-and-55633-HCT-15_SNP_EXOME-L1409Q|1409q|	YTHDC2_p.L1409Q	1409	HCT-15	CAM	FALSE	TRUE	TRUE	TRUE
DGQYFEPVVPLPDLVEVSSGQENEQVVFSHR	R	R	FALSE	FALSE	A	31	1	31	3	1	0	NA	A6NKT7	A6NKT7	3A		sp|A6NKT7|ENSG00000153165.18|RGPD3|ENST00000409886.3|29096-HCT-15_SNP_EXOME-E1351Q|1351q|	RGPD3_p.E1351Q	1351	HCT-15	CAM	FALSE	TRUE	FALSE	TRUE
DGSTAIHFEHSWGDGVAVLR	K	R	FALSE	FALSE	F	20	11	30	3	3	0	NA	P23786	P23786	3A		sp|P23786|ENSG00000157184.6|CPT2|ENST00000371486.3|3214-HCT-15_SNP_RNA-V368I-and-3214-HCT-15_SNP_EXOME-V368I|368i|	CPT2_p.V368I	368	HCT-15	CAM	FALSE	TRUE	TRUE	TRUE
DLDEDANGITDDGKEINEK	K	K	FALSE	FALSE	S	19	7	25	3	1	0	NA	Q5QJE6	Q5QJE6	3A		sp|Q5QJE6|ENSG00000067334.13|DNTTIP2|ENST00000436063.6|13338-HCT-15_SNP_RNA-E309D-and-13338-HCT-15_SNP_EXOME-E309D|309d|	DNTTIP2_p.E309D	309	HCT-15	CAM	FALSE	TRUE	TRUE	TRUE
DLEDLFFK	K	K	FALSE	FALSE	Y	8	5	12	2	3	0	NA	Q13242	Q13242	3A		sp|Q13242|ENSG00000111786.8|SRSF9|ENST00000229390.7|126450-HCT-15_SNP_RNA-Y35F-and-126450-HCT-15_SNP_EXOME-Y35F|35f|	SRSF9_p.Y35F	35	HCT-15	CAM	FALSE	TRUE	TRUE	TRUE
DLGDLIEATGFDR	K	R	FALSE	FALSE	L	13	8	20	2	1	0	NA	Q6NXR4	Q6NXR4	3A		sp|Q6NXR4|ENSG00000129696.12|C8orf41|ENST00000613904.1|86116-HCT-15_SNP_RNA-E63G-and-86116-HCT-15_SNP_EXOME-E63G|63g|	C8orf41_p.E63G	63	HCT-15	CAM	FALSE	TRUE	TRUE	TRUE
DLGSMSHLTGYETER	K	R	FALSE	FALSE	Q	15	1	15	2, 3	2	0	NA	Q9Y2Z9	Q9Y2Z9	3A		sp|Q9Y2Z9-1|ENSG00000119723.16|COQ6|ENST00000334571.6|132813-HCT-15_SNP_RNA-V406M-and-132813-HCT-15_SNP_EXOME-V406M|406m|	COQ6_p.V406M	406	HCT-15	CAM	FALSE	TRUE	TRUE	TRUE
DLVHAIESLPGSGPLTALDQDLLLLK	K	K	FALSE	FALSE	A	26	14	39	3	2	0	NA	Q9BXB5	Q9BXB5	3A		sp|Q9BXB5-1|ENSG00000144645.13|OSBPL10|ENST00000396556.6|39900-HCT-15_SNP_RNA-N254D-and-39900-HCT-15_SNP_EXOME-N254D|254d|	OSBPL10_p.N254D	254	HCT-15	CAM	FALSE	TRUE	TRUE	TRUE
DMAGAQAAAVALNEEFLK	R	K	FALSE	FALSE	N	18	9	26	2	10	0	2M(15.9949)	Q14126	Q14126	3A		sp|Q14126|ENSG00000046604.12|DSG2|ENST00000261590.12|169179-HCT-15_SNP_RNA-R773K-and-169179-HCT-15_SNP_EXOME-R773K|773k|	DSG2_p.R773K	773	HCT-15	CAM	FALSE	TRUE	TRUE	TRUE
DMHSSYK	R	K	FALSE	FALSE	H	7	14	20	2	3	0	2M(15.9949)	P08621	P08621	3A		sp|P08621-1|ENSG00000104852.14|SNRNP70|ENST00000598441.5|177210-HCT-15_RARE_RNA-A160S-and-177210-HCT-15_RARE_EXOME-A160S|160s|	SNRNP70_p.A160S	160	HCT-15	CAM	TRUE	FALSE	TRUE	TRUE
DNAGDWADFWR	R	R	FALSE	FALSE	M	11	1	11	2	7	0	NA	Q9UDY2	Q9UDY2	3A		sp|Q9UDY2-1|ENSG00000119139.18|TJP2|ENST00000377245.8|90437-HCT-15_RARE_RNA-R682W-and-90437-HCT-15_RARE_EXOME-R682W|682w|	TJP2_p.R682W	682	HCT-15	CAM	TRUE	FALSE	TRUE	TRUE
DNAMMEYLK	K	K	FALSE	FALSE	L	9	7	15	2	3	0	NA	P15311	P15311	3A		sp|P15311|ENSG00000092820.17|EZR|ENST00000367075.3|71343-HCT-15_RARE_EXOME-L189M|189m|	EZR_p.L189M	189	HCT-15	CAM	TRUE	FALSE	FALSE	TRUE
DREAAEGLGSHER	K	R	FALSE	FALSE	A	13	3	15	3	1	0	NA	P17655	P17655	3A		sp|P17655-1|ENSG00000162909.17|CAPN2|ENST00000295006.5|8501-HCT-15_SNP_RNA-D22E-and-8501-HCT-15_SNP_EXOME-D22E|22e|	CAPN2_p.D22E	22	HCT-15	CAM	FALSE	TRUE	TRUE	TRUE
DSRPSQAAGDNQGDEVKEQTFSGGTS	K	S	FALSE	FALSE	Q	26	3	28	2	1	0	NA	Q9Y2W1	Q9Y2W1	3A		sp|Q9Y2W1|ENSG00000054118.13|THRAP3|ENST00000354618.9|2173-HCT-15_SNP_RNA-A201V-and-2173-HCT-15_SNP_EXOME-A201V|201v|	THRAP3_p.A201V	201	HCT-15	CAM	FALSE	TRUE	TRUE	TRUE
DSRPSQAAGDNQGDEVKEQTFSGGTSQDTK	K	K	FALSE	FALSE	A	30	3	32	3	5	0	NA	Q9Y2W1	Q9Y2W1	3A		sp|Q9Y2W1|ENSG00000054118.13|THRAP3|ENST00000354618.9|2173-HCT-15_SNP_RNA-A201V-and-2173-HCT-15_SNP_EXOME-A201V|201v|	THRAP3_p.A201V	201	HCT-15	CAM	FALSE	TRUE	TRUE	TRUE
DVGEWQHEEFYR	K	R	FALSE	FALSE	Y	12	17	28	2, 3	12	0	NA	Q12931	Q12931	3A		sp|Q12931-1|ENSG00000126602.10|TRAP1|ENST00000246957.9|151786-HCT-15_SNP_RNA-R307G-and-151786-HCT-15_SNP_EXOME-R307G|307g|	TRAP1_p.R307G	307	HCT-15	CAM	FALSE	TRUE	TRUE	TRUE
EAAGEGPALYEDPPDHK	K	K	FALSE	FALSE	T	17	7	23	2, 3	2	0	NA	P27695	P27695	3A		sp|P27695|ENSG00000100823.11|APEX1|ENST00000555414.5|130585-HCT-15_SNP_RNA-Q51H-and-130585-HCT-15_SNP_EXOME-Q51H|51h|	APEX1_p.Q51H	51	HCT-15	CAM	FALSE	TRUE	TRUE	TRUE
EAGFPPGVVNIITGYGPTAGAAIAQHM	K	M	FALSE	FALSE	D	27	20	46	2	2	0	NA	P30837	P30837	3A		sp|P30837|ENSG00000137124.7|ALDH1B1|ENST00000377698.3|90100-HCT-15_SNP_RNA-V253M-and-90100-HCT-15_SNP_EXOME-V253M|253m|	ALDH1B1_p.V253M	253	HCT-15	CAM	FALSE	TRUE	TRUE	TRUE
EAGFPPGVVNIITGYGPTAGAAIAQHMDVDK	K	K	FALSE	FALSE	V	31	20	50	3	23	0	27M(15.9949)	P30837	P30837	3A		sp|P30837|ENSG00000137124.7|ALDH1B1|ENST00000377698.3|90100-HCT-15_SNP_RNA-V253M-and-90100-HCT-15_SNP_EXOME-V253M|253m|	ALDH1B1_p.V253M	253	HCT-15	CAM	FALSE	TRUE	TRUE	TRUE
EAGFPPGVVNIITGYGPTAGAAIAQHMDVDKVA	K	A	FALSE	FALSE	F	33	20	52	3	1	0	NA	P30837	P30837	3A		sp|P30837|ENSG00000137124.7|ALDH1B1|ENST00000377698.3|90100-HCT-15_SNP_RNA-V253M-and-90100-HCT-15_SNP_EXOME-V253M|253m|	ALDH1B1_p.V253M	253	HCT-15	CAM	FALSE	TRUE	TRUE	TRUE
EAGFPPGVVNIITGYGPTAGAAIAQHMDVDKVAFTGSTE	K	E	FALSE	FALSE	V	39	20	58	3	5	0	NA	P30837	P30837	3A		sp|P30837|ENSG00000137124.7|ALDH1B1|ENST00000377698.3|90100-HCT-15_SNP_RNA-V253M-and-90100-HCT-15_SNP_EXOME-V253M|253m|	ALDH1B1_p.V253M	253	HCT-15	CAM	FALSE	TRUE	TRUE	TRUE
EAGFPPGVVNIITGYGPTAGAAIAQHMDVDKVAFTGSTEVGHLIQK	K	K	FALSE	FALSE	A	46	20	65	4, 5	7	0	27M(15.9949)	P30837	P30837	3A		sp|P30837|ENSG00000137124.7|ALDH1B1|ENST00000377698.3|90100-HCT-15_SNP_RNA-V253M-and-90100-HCT-15_SNP_EXOME-V253M|253m|	ALDH1B1_p.V253M	253	HCT-15	CAM	FALSE	TRUE	TRUE	TRUE
EAGLFVPR	K	R	FALSE	FALSE	S	8	1	8	2	2	0	NA	P53396	P53396	3A		sp|P53396-1|ENSG00000131473.16|ACLY|ENST00000352035.6|165034-HCT-15_RARE_RNA-V784L-and-165034-HCT-15_RARE_EXOME-V784L|784l|	ACLY_p.V784L	784	HCT-15	CAM	TRUE	FALSE	TRUE	TRUE
EAGVENFIHVSHLNANIK	K	K	FALSE	FALSE	S	18	13	30	3	3	0	NA	Q16795	Q16795	3A		sp|Q16795|ENSG00000139180.10|NDUFA9|ENST00000266544.9|115728-HCT-15_RARE_RNA-K163N-and-115728-HCT-15_RARE_EXOME-K163N|163n|	NDUFA9_p.K163N	163	HCT-15	CAM	TRUE	FALSE	TRUE	TRUE
EALDVLDAVLK	R	K	FALSE	FALSE	A	11	6	16	2	11	0	NA	Q92552	Q92552	3A		sp|Q92552-1|ENSG00000113048.16|MRPS27|ENST00000261413.9|59502-HCT-15_SNP_RNA-G284D-and-59502-HCT-15_SNP_EXOME-G284D|284d|	MRPS27_p.G284D	284	HCT-15	CAM	FALSE	TRUE	TRUE	TRUE
EAPAGPLEEDDLEPLTLAPTPAPRPPQDLIGLR	K	R	FALSE	FALSE	L	33	9	41	3	14	0	NA	Q92797	Q92797	3A		sp|Q92797-1|ENSG00000125755.18|SYMPK|ENST00000245934.11|183215-HCT-15_RARE_RNA-A1129T-and-183215-HCT-15_RARE_EXOME-A1129T|1129t|	SYMPK_p.A1129T	1129	HCT-15	CAM	TRUE	FALSE	TRUE	TRUE
ECGMESLKAMLPLYDTGSGTIYDLR	Y	R	FALSE	FALSE	H	25	1	25	3	1	0	10M(15.9949), 2C(56.0374), 4M(15.9949)	O94923	O94923	3A	540	sp|O94923|ENSG00000138604.9|GLCE|ENST00000261858.6|140177-HCT-15_RARE_RNA-R540C-and-140177-HCT-15_RARE_EXOME-R540C|540c|	GLCE_p.R540C	540	HCT-15	CAM	TRUE	FALSE	TRUE	TRUE
EDQTLALLSQFK	R	K	FALSE	FALSE	S	12	1	12	2	6	0	NA	Q6UX04	Q6UX04	3A		sp|Q6UX04-1|ENSG00000153015.15|CWC27|ENST00000381070.7|54388-HCT-15_RARE_RNA-N390S-and-54388-HCT-15_RARE_EXOME-N390S|390s|	CWC27_p.N390S	390	HCT-15	CAM	TRUE	FALSE	TRUE	TRUE
EFAGSLGIPFLETSAK	K	K	FALSE	FALSE	N	16	12	27	2	15	0	NA	Q9H0U4	Q9H0U4	3A		sp|Q9H0U4|ENSG00000174903.15|RAB1B|ENST00000311481.10|106330-HCT-15_RARE_RNA-D141G-and-106330-HCT-15_RARE_EXOME-D141G|141g|	RAB1B_p.D141G	141	HCT-15	CAM	TRUE	FALSE	TRUE	TRUE
EFSPFGTITSANVMMEGGR	K	R	FALSE	FALSE	S	19	1	19	2	7	0	15M(15.9949)	Q9H361	Q9H361	3A		sp|Q9H361|ENSG00000151846.8|PABPC3|ENST00000281589.4|127260-HCT-15_RARE_RNA-K324N,127260-HCT-15_RARE_RNA-A313E|313e324n|;sp|P11940-1|ENSG00000070756.15|PABPC1|ENST00000318607.9|87770-HCT-15_RARE_EXOME-K324N|324n|	PABPC3_p.K324N,A313E;PABPC1_p.K324N	324,313;324	HCT-15	CAM	TRUE	FALSE	TRUE	TRUE
EFTAQNLGNLFMAQALQEYNN	K	N	FALSE	FALSE	-	21	21	41	2	2	0	NA	O15372	O15372	3A		sp|O15372|ENSG00000147677.10|EIF3H|ENST00000521861.5|88113-HCT-15_RARE_RNA-K340N-and-88113-HCT-15_RARE_EXOME-K340N|340n|	EIF3H_p.K340N	340	HCT-15	CAM	TRUE	FALSE	TRUE	TRUE
EGAPIEPDPPVSHWRPEAVQYYEDGAR	R	R	FALSE	FALSE	L	27	10	36	4	1	0	NA	Q96HS1	Q96HS1	3A		sp|Q96HS1-1|ENSG00000247077.6|PGAM5|ENST00000498926.6|121208-HCT-15_SNP_RNA-K191R-and-121208-HCT-15_SNP_EXOME-K191R|191r|	PGAM5_p.K191R	191	HCT-15	CAM	FALSE	TRUE	TRUE	TRUE
EHDVQNTFEEMEK	K	K	FALSE	FALSE	H	13	22	34	3	1	0	NA	Q8N4T8	Q8N4T8	3A		sp|Q8N4T8-1|ENSG00000145439.11|CBR4|ENST00000306193.7|52858-HCT-15_SNP_RNA-L70M-and-52858-HCT-15_SNP_EXOME-L70M|70m|	CBR4_p.L70M	70	HCT-15	CAM	FALSE	TRUE	TRUE	TRUE
EIVQFFSGLEIVPNGITLPVDPEGKITGEAFMQFASQELAEK	E	K	FALSE	FALSE	A	42	4	45	5	3	0	32M(15.9949)	P52597	P52597	3A		sp|P52597|ENSG00000169813.16|HNRNPF|ENST00000443950.6|100445-HCT-15_SNP_RNA-V157M-and-100445-HCT-15_SNP_EXOME-V157M|157m|	HNRNPF_p.V157M	157	HCT-15	CAM	FALSE	TRUE	TRUE	TRUE
EKDLEDLFFK	R	K	FALSE	FALSE	Y	10	3	12	2	4	0	NA	Q13242	Q13242	3A		sp|Q13242|ENSG00000111786.8|SRSF9|ENST00000229390.7|126450-HCT-15_SNP_RNA-Y35F-and-126450-HCT-15_SNP_EXOME-Y35F|35f|	SRSF9_p.Y35F	35	HCT-15	CAM	FALSE	TRUE	TRUE	TRUE
ELDECFAQANDQMETLDSLIR	R	R	FALSE	FALSE	E	21	1	21	3	9	0	5C(56.0374)	P15924	P15924	3A	110	sp|P15924-1|ENSG00000096696.13|DSP|ENST00000379802.7|62914-HCT-15_RARE_RNA-I120T-and-62914-HCT-15_RARE_EXOME-I120T|120t|	DSP_p.I120T	120	HCT-15	CAM	TRUE	FALSE	TRUE	TRUE
ELSGLPSGPSAGSGPPPPPPGPPPPPVSTSSGSDESASR	K	R	FALSE	FALSE	S	39	1	39	3	2	0	NA	Q01518	Q01518	3A		sp|Q01518-1|ENSG00000131236.16|CAP1|ENST00000372797.7|2315-HCT-15_RARE_RNA-C229G-and-2315-HCT-15_RARE_EXOME-C229G,2315-HCT-15_RARE_RNA-C236G-and-2315-HCT-15_RARE_EXOME-C236G,2315-HCT-15_RARE_EXOME-I245S,2315-HCT-15_RARE_EXOME-C247G,2315-HCT-15_RARE_EXOME-Y249D|229g236g245s247g249d|	CAP1_p.C229G,C236G,I245S,C247G,Y249D	229236245247249	HCT-15	CAM	TRUE	FALSE	TRUE	TRUE
EPWLLPSQHNDIIQDALGQR	R	R	FALSE	FALSE	Y	20	13	32	2, 3	84	0	NA	Q14697	Q14697	3A		sp|Q14697-1|ENSG00000089597.16|GANAB|ENST00000356638.7|112080-HCT-15_SNP_RNA-R698Q-and-112080-HCT-15_SNP_EXOME-R698Q|698q|	GANAB_p.R698Q	698	HCT-15	CAM	FALSE	TRUE	TRUE	TRUE
EPWVEQEGPEYWDR	R	R	FALSE	FALSE	E	14	1	14	2	3	0	NA	P10321	P10321	3A		sp|P10321|ENSG00000204525.16|HLA-C|ENST00000376228.9|68111-HCT-15_SNP_RNA-A73E-and-68111-HCT-15_SNP_EXOME-A73E|73e|	HLA-C_p.A73E	73	HCT-15	CAM	FALSE	TRUE	TRUE	TRUE
EQALQEAMEQLEELELER	K	R	FALSE	FALSE	K	18	6	23	2	1	0	NA	Q9UH65	Q9UH65	3A		sp|Q9UH65|ENSG00000133789.14|SWAP70|ENST00000318950.10|103721-HCT-15_SNP_RNA-Q505E-and-103721-HCT-15_SNP_EXOME-Q505E|505e|	SWAP70_p.Q505E	505	HCT-15	CAM	FALSE	TRUE	TRUE	TRUE
EQALQEAMEQLEELELERK	K	K	FALSE	FALSE	Q	19	6	24	3	1	0	NA	Q9UH65	Q9UH65	3A		sp|Q9UH65|ENSG00000133789.14|SWAP70|ENST00000318950.10|103721-HCT-15_SNP_RNA-Q505E-and-103721-HCT-15_SNP_EXOME-Q505E|505e|	SWAP70_p.Q505E	505	HCT-15	CAM	FALSE	TRUE	TRUE	TRUE
EQDLQLEELRQPVS	R	S	FALSE	FALSE	T	14	3	16	2	1	0	NA	O60763	O60763	3A		sp|O60763-1|ENSG00000138768.14|USO1|ENST00000514213.6|47074-HCT-15_RARE_RNA-Q672P-and-47074-HCT-15_RARE_EXOME-Q672P|672p|	USO1_p.Q672P	672	HCT-15	CAM	TRUE	FALSE	TRUE	TRUE
EQLQQEQALLEEIER	R	R	FALSE	FALSE	H	15	1	15	2	8	0	NA	Q15149	Q15149	3A		sp|Q15149-1|ENSG00000178209.14|PLEC|ENST00000322810.8|89058-HCT-15_SNP_RNA-R1386Q-and-89058-HCT-15_SNP_EXOME-R1386Q|1386q|	PLEC_p.R1386Q	1386	HCT-15	CAM	FALSE	TRUE	TRUE	TRUE
ESFADILPEAAALVK	R	K	FALSE	FALSE	D	15	1	15	2	2	0	NA	Q5VT52	Q5VT52	3A		sp|Q5VT52-1|ENSG00000163125.15|RPRD2|ENST00000369068.4|5515-HCT-15_SNP_RNA-V103I-and-5515-HCT-15_SNP_EXOME-V103I|103i|	RPRD2_p.V103I	103	HCT-15	CAM	FALSE	TRUE	TRUE	TRUE
ESFADILPEAAALVKDPSVSK	R	K	FALSE	FALSE	S	21	1	21	3	6	0	NA	Q5VT52	Q5VT52	3A		sp|Q5VT52-1|ENSG00000163125.15|RPRD2|ENST00000369068.4|5515-HCT-15_SNP_RNA-V103I-and-5515-HCT-15_SNP_EXOME-V103I|103i|	RPRD2_p.V103I	103	HCT-15	CAM	FALSE	TRUE	TRUE	TRUE
ETFLDPFILR	K	R	FALSE	FALSE	D	10	1	10	2	2	0	NA	P23470	P23470	3A		sp|P23470-1|ENSG00000144724.19|PTPRG|ENST00000474889.5|35379-HCT-15_SNP_RNA-V237I-and-35379-HCT-15_SNP_EXOME-V237I|237i|	PTPRG_p.V237I	237	HCT-15	CAM	FALSE	TRUE	TRUE	TRUE
EVSSSFDQVIK	K	K	FALSE	FALSE	E	11	1	11	2	2	0	NA	Q9Y6C9	Q9Y6C9	3A		sp|Q9Y6C9|ENSG00000109919.9|MTCH2|ENST00000302503.7|111432-HCT-15_SNP_RNA-H119Q-and-111432-HCT-15_SNP_EXOME-H119Q|119q|	MTCH2_p.H119Q	119	HCT-15	CAM	FALSE	TRUE	TRUE	TRUE
EVTVNVLSPR	R	R	FALSE	FALSE	Y	10	11	20	2	2	0	NA	P05362	P05362	3A		sp|P05362|ENSG00000090339.8|ICAM1|ENST00000264832.7|173403-HCT-15_SNP_RNA-K469E-and-173403-HCT-15_SNP_EXOME-K469E|469e|	ICAM1_p.K469E	469	HCT-15	CAM	FALSE	TRUE	TRUE	TRUE
EWSLELSPAQNWTPPQPR	R	R	FALSE	FALSE	T	18	11	28	2	2	0	NA	Q8N6T3	Q8N6T3	3A		sp|Q8N6T3-1|ENSG00000101199.12|ARFGAP1|ENST00000370283.8|187237-HCT-15_SNP_RNA-S128L-and-187237-HCT-15_SNP_EXOME-S128L|128l|	ARFGAP1_p.S128L	128	HCT-15	CAM	FALSE	TRUE	TRUE	TRUE
FAEAFEDIPR	K	R	FALSE	FALSE	A	10	22	31	2	2	0	NA	P50990	P50990	3A		sp|P50990-1|ENSG00000156261.12|CCT8|ENST00000286788.8|191141-HCT-15_RARE_RNA-A447D-and-191141-HCT-15_RARE_EXOME-A447D|447d|	CCT8_p.A447D	447	HCT-15	CAM	TRUE	FALSE	TRUE	TRUE
FAQANDQMETLDSLIR	C	R	TRUE	FALSE	E	16	1	16	2	1	0	NA	P15924	P15924	3A		sp|P15924-1|ENSG00000096696.13|DSP|ENST00000379802.7|62914-HCT-15_RARE_RNA-I120T-and-62914-HCT-15_RARE_EXOME-I120T|120t|	DSP_p.I120T	120	HCT-15	CAM	TRUE	FALSE	TRUE	TRUE
FFGSLPDSWAR	K	R	FALSE	FALSE	G	11	11	21	2	3	0	NA	Q9BUP3	Q9BUP3	3A		sp|Q9BUP3-1|ENSG00000109854.13|HTATIP2|ENST00000421577.6|104095-HCT-15_SNP_RNA-S197R-and-104095-HCT-15_SNP_EXOME-S197R|197r|	HTATIP2_p.S197R	197	HCT-15	CAM	FALSE	TRUE	TRUE	TRUE
FFTGQITATGK	R	K	FALSE	FALSE	V	11	1	11	2	2	0	NA	Q13423	Q13423	3A		sp|Q13423|ENSG00000112992.16|NNT|ENST00000264663.9|54109-HCT-15_RARE_RNA-A222T-and-54109-HCT-15_RARE_EXOME-A222T|222t|	NNT_p.A222T	222	HCT-15	CAM	TRUE	FALSE	TRUE	TRUE
FGGGNPELLTHMVSK	R	K	FALSE	FALSE	G	15	8	22	2, 3	24	0	12M(15.9949)	P40939	P40939	3A		sp|P40939-1|ENSG00000084754.11|HADHA|ENST00000380649.7|26387-HCT-15_RARE_RNA-Q621H-and-26387-HCT-15_RARE_EXOME-Q621H|621h|	HADHA_p.Q621H	621	HCT-15	CAM	TRUE	FALSE	TRUE	TRUE
FHYLQVAFPGASDADLVPK	R	K	FALSE	FALSE	L	19	6	24	3	1	0	NA	O75689	O75689	3A		sp|O75689-1|ENSG00000105963.13|ADAP1|ENST00000265846.9|76695-HCT-15_SNP_RNA-G241S-and-76695-HCT-15_SNP_EXOME-G241S|241s|	ADAP1_p.G241S	241	HCT-15	CAM	FALSE	TRUE	TRUE	TRUE
FIAPAASLGFR	R	R	FALSE	FALSE	F	11	16	26	2	1	0	NA	P53370	P53370	3A		sp|P53370-1|ENSG00000170917.13|NUDT6|ENST00000304430.9|52086-HCT-15_SNP_RNA-C114R-and-52086-HCT-15_SNP_EXOME-C114R|114r|	NUDT6_p.C114R	114	HCT-15	CAM	FALSE	TRUE	TRUE	TRUE
FIIHVPPGEFNEVFNDVR	K	R	FALSE	FALSE	L	18	7	24	3	2	0	NA	P47755	P47755	3A		sp|P47755-1|ENSG00000198898.13|CAPZA2|ENST00000361183.7|75174-HCT-15_RARE_RNA-A24V-and-75174-HCT-15_RARE_EXOME-A24V|24v|	CAPZA2_p.A24V	24	HCT-15	CAM	TRUE	FALSE	TRUE	TRUE
FIQENVFVAANHNASPLSIK	R	K	FALSE	FALSE	E	20	6	25	3	3	0	NA	P11172	P11172	3A		sp|P11172-1|ENSG00000114491.13|UMPS|ENST00000232607.6|36507-HCT-15_SNP_RNA-G213A-and-36507-HCT-15_SNP_EXOME-G213A|213a|	UMPS_p.G213A	213	HCT-15	CAM	FALSE	TRUE	TRUE	TRUE
FLDKLPQQTGDR	R	R	FALSE	FALSE	A	12	1	12	2, 3	3	0	NA	Q86WV6	Q86WV6	3A		sp|Q86WV6|ENSG00000184584.12|TMEM173|ENST00000330794.8|61149-HCT-15_SNP_RNA-H232R-and-61149-HCT-15_SNP_EXOME-H232R|232r|	TMEM173_p.H232R	232	HCT-15	CAM	FALSE	TRUE	TRUE	TRUE
FLSSSPHLPPSSYFNANGR	K	R	FALSE	FALSE	A	19	13	31	3	11	0	NA	O14773	O14773	3A		sp|O14773-1|ENSG00000166340.16|TPP1|ENST00000299427.11|109975-HCT-15_RARE_RNA-S445N-and-109975-HCT-15_RARE_EXOME-S445N|445n|	TPP1_p.S445N	445	HCT-15	CAM	TRUE	FALSE	TRUE	TRUE
FQTIDIEPDIEALLSQGLSCA	R	A	FALSE	FALSE	-	21	8	28	2	3	0	20C(56.0374)	P07203	P07203	3A	202	sp|P07203-1|ENSG00000233276.4|GPX1|ENST00000419783.2|40904-HCT-15_SNP_RNA-P200L-and-40904-HCT-15_SNP_EXOME-P200L|200l|	GPX1_p.P200L	200	HCT-15	CAM	FALSE	TRUE	TRUE	TRUE
FVTDQGACAGSPSLVAATR	R	R	FALSE	FALSE	R	19	8	26	2	2	0	NA	Q96GM1	Q96GM1	3A	191	sp|Q96GM1-1|ENSG00000105520.10|PLPPR2|ENST00000251473.9|173637-HCT-15_RARE_RNA-A201T-and-173637-HCT-15_RARE_EXOME-A201T|201t|	PLPPR2_p.A201T	201	HCT-15	CAM	TRUE	FALSE	TRUE	TRUE
GDYIGSTYFER	R	R	FALSE	FALSE	C	11	6	16	2	1	0	NA	P61081	P61081	3A		sp|P61081|ENSG00000130725.7|UBE2M|ENST00000253023.7|185046-HCT-15_RARE_RNA-G171D-and-185046-HCT-15_RARE_EXOME-G171D|171d|	UBE2M_p.G171D	171	HCT-15	CAM	TRUE	FALSE	TRUE	TRUE
GFGFVTFDDHDPVDKIALQK	R	K	FALSE	FALSE	Y	20	5	24	3, 4	16	0	NA	P22626	P22626	3A		sp|P22626-1|ENSG00000122566.20|HNRNPA2B1|ENST00000354667.8|77381-HCT-15_RARE_EXOME-V170A|170a|	HNRNPA2B1_p.V170A	170	HCT-15	CAM	TRUE	FALSE	FALSE	TRUE
GFGTDEQAIVDVVANC	K	C	FALSE	TRUE	S	16	7	22	2	1	0	16C(56.0374)	P20073	P20073	3A	215	sp|P20073-1|ENSG00000138279.15|ANXA7|ENST00000372919.8|101160-HCT-15_RARE_RNA-R215C-and-101160-HCT-15_RARE_EXOME-R215C|215c|	ANXA7_p.R215C	215	HCT-15	CAM	TRUE	FALSE	TRUE	TRUE
GFGTDEQAIVDVVANCSNDQR	K	R	FALSE	FALSE	Q	21	7	27	3	6	0	16C(56.0374)	P20073	P20073	3A	215	sp|P20073-1|ENSG00000138279.15|ANXA7|ENST00000372919.8|101160-HCT-15_RARE_RNA-R215C-and-101160-HCT-15_RARE_EXOME-R215C|215c|	ANXA7_p.R215C	215	HCT-15	CAM	TRUE	FALSE	TRUE	TRUE
GFTTAGVLAAHK	K	K	FALSE	FALSE	L	12	18	29	2, 3	13	0	NA	P32322	P32322	3A		sp|P32322-1|ENSG00000183010.16|PYCR1|ENST00000619204.4|168184-HCT-15_RARE_EXOME-A21T|21t|	PYCR1_p.A21T	21	HCT-15	CAM	TRUE	FALSE	FALSE	TRUE
GIIDLIEER	K	R	FALSE	FALSE	A	9	22	30	2	8	0	NA	Q96RP9	Q96RP9	3A		sp|Q96RP9-1|ENSG00000168827.14|GFM1|ENST00000486715.5|37581-HCT-15_SNP_RNA-V215I-and-37581-HCT-15_SNP_EXOME-V215I|215i|	GFM1_p.V215I	215	HCT-15	CAM	FALSE	TRUE	TRUE	TRUE
GISEDSHLESLQDVGQSAAPTFMISPETITGTGK	K	K	FALSE	FALSE	K	34	1	34	3	3	0	NA	P27816	P27816	3A		sp|P27816-1|ENSG00000047849.21|MAP4|ENST00000360240.10|40535-HCT-15_SNP_EXOME-V628I|628i|	MAP4_p.V628I	628	HCT-15	CAM	FALSE	TRUE	FALSE	TRUE
GISFDAAATSGGSASSEK	R	K	FALSE	FALSE	A	18	8	25	2	8	0	NA	P13804	P13804	3A		sp|P13804-1|ENSG00000140374.15|ETFA|ENST00000557943.5|144492-HCT-15_SNP_RNA-T171I-and-144492-HCT-15_SNP_EXOME-T171I|171i|	ETFA_p.T171I	171	HCT-15	CAM	FALSE	TRUE	TRUE	TRUE
GLSGAQDPFPGPAPVPVEVVQK	R	K	FALSE	FALSE	F	22	9	30	2	1	0	NA	O15213	O15213	3A		sp|O15213|ENSG00000227057.9|WDR46|ENST00000374617.8|68549-HCT-15_SNP_EXOME-T94A|94a|	WDR46_p.T94A	94	HCT-15	CAM	FALSE	TRUE	FALSE	TRUE
GLSGAQDPFPGPAPVPVEVVQKF	R	F	FALSE	FALSE	C	23	9	31	2	1	0	NA	O15213	O15213	3A		sp|O15213|ENSG00000227057.9|WDR46|ENST00000374617.8|68549-HCT-15_SNP_EXOME-T94A|94a|	WDR46_p.T94A	94	HCT-15	CAM	FALSE	TRUE	FALSE	TRUE
GLVEPVNMVDNGDGTHTVTYTPSQEGPYMVSVK	R	K	FALSE	FALSE	Y	33	1	33	3	13	0	29M(15.9949), 8M(15.9949)	O75369	O75369	3A		sp|O75369-1|ENSG00000136068.14|FLNB|ENST00000295956.8|35308-HCT-15_SNP_RNA-V1471M-and-35308-HCT-15_SNP_EXOME-V1471M|1471m|	FLNB_p.V1471M	1471	HCT-15	CAM	FALSE	TRUE	TRUE	TRUE
GTSGSALTALISQVLEAPR	K	R	FALSE	FALSE	V	19	17	35	2	1	0	NA	Q9H9Q2	Q9H9Q2	3A		sp|Q9H9Q2-1|ENSG00000144524.17|COPS7B|ENST00000410024.5|24923-HCT-15_RARE_RNA-G39R-and-24923-HCT-15_RARE_EXOME-G39R|39r|	COPS7B_p.G39R	39	HCT-15	CAM	TRUE	FALSE	TRUE	TRUE
GVSSPDHIFLPIPNWEHK	R	K	FALSE	FALSE	E	18	1	18	3, 4	2	0	NA	P06756	P06756	3A		sp|P06756-1|ENSG00000138448.11|ITGAV|ENST00000261023.7|23306-HCT-15_SNP_RNA-V783I-and-23306-HCT-15_SNP_EXOME-V783I|783i|	ITGAV_p.V783I	783	HCT-15	CAM	FALSE	TRUE	TRUE	TRUE
GVVPLAGTNGETTIQGLDGLSER	K	R	FALSE	FALSE	C	23	6	28	2	8	0	NA	P04075	P04075	3A		sp|P04075-1|ENSG00000149925.18|ALDOA|ENST00000569545.5|147948-HCT-15_RARE_EXOME-T125I|125i|	ALDOA_p.T125I	125	HCT-15	CAM	TRUE	FALSE	FALSE	TRUE
HDPAAWEAAQSMIPINEPYGDDLDATYRPMY	K	Y	FALSE	FALSE	S	31	16	46	3	4	0	NA	P14923	P14923	3A		sp|P14923|ENSG00000173801.16|JUP|ENST00000393930.5|164996-HCT-15_SNP_EXOME-M697L|697l|	JUP_p.M697L	697	HCT-15	CAM	FALSE	TRUE	FALSE	TRUE
HFTAQGLPDLNHSQVYAVK	K	K	FALSE	FALSE	T	19	1	19	3	4	0	NA	Q92900	Q92900	3A		sp|Q92900-1|ENSG00000005007.12|UPF1|ENST00000599848.5|174650-HCT-15_RARE_RNA-R473H-and-174650-HCT-15_RARE_EXOME-R473H|473h|	UPF1_p.R473H	473	HCT-15	CAM	TRUE	FALSE	TRUE	TRUE
HGYFDEEMNR	R	R	FALSE	FALSE	V	10	1	10	2	3	0	NA	Q15149	Q15149	3A		sp|Q15149-1|ENSG00000178209.14|PLEC|ENST00000322810.8|89058-HCT-15_SNP_RNA-R2969H-and-89058-HCT-15_SNP_EXOME-R2969H|2969h|	PLEC_p.R2969H	2969	HCT-15	CAM	FALSE	TRUE	TRUE	TRUE
HTLSFVDVGTGK	K	K	FALSE	FALSE	V	12	1	12	2	2	0	NA	P31040	P31040	3A		sp|P31040-1|ENSG00000073578.16|SDHA|ENST00000264932.10|53319-HCT-15_RARE_RNA-Y629F-and-53319-HCT-15_RARE_EXOME-Y629F|629f|	SDHA_p.Y629F	629	HCT-15	CAM	TRUE	FALSE	TRUE	TRUE
HWVEEFFPSVSLGDPTLETLLR	R	R	FALSE	FALSE	Q	22	18	39	3	1	0	NA	Q9BU23	Q9BU23	3A		sp|Q9BU23-1|ENSG00000100258.17|LMF2|ENST00000474879.6|196469-HCT-15_SNP_RNA-Q579H-and-196469-HCT-15_SNP_EXOME-Q579H|579h|	LMF2_p.Q579H	579	HCT-15	CAM	FALSE	TRUE	TRUE	TRUE
IATSPASQLSPTELTEMR	F	R	FALSE	FALSE	N	18	1	18	2	5	0	NA	Q9NYK5	Q9NYK5	3A		sp|Q9NYK5-1|ENSG00000154719.13|MRPL39|ENST00000352957.8|191066-HCT-15_SNP_RNA-S31P-and-191066-HCT-15_SNP_EXOME-S31P|31p|	MRPL39_p.S31P	31	HCT-15	CAM	FALSE	TRUE	TRUE	TRUE
ICIDSLSAQLSQLQK	R	K	FALSE	FALSE	Q	15	1	15	3	1	0	2C(56.0374)	P02545	P02545	3A	298	sp|P02545-1|ENSG00000160789.19|LMNA|ENST00000368300.8|6152-HCT-15_RARE_RNA-R298C-and-6152-HCT-15_RARE_EXOME-R298C|298c|	LMNA_p.R298C	298	HCT-15	CAM	TRUE	FALSE	TRUE	TRUE
IEPDRAQVDEVLQLR	R	R	FALSE	FALSE	E	15	1	15	3	2	0	NA	O60437	O60437	3A		sp|O60437|ENSG00000118898.15|PPL|ENST00000345988.6|152024-HCT-15_SNP_RNA-A1007V-and-152024-HCT-15_SNP_EXOME-A1007V|1007v|	PPL_p.A1007V	1007	HCT-15	CAM	FALSE	TRUE	TRUE	TRUE
IFEEDPAVGAIVLTGGDK	K	K	FALSE	FALSE	A	18	1	18	2	28	0	NA	P30084	P30084	3A		sp|P30084|ENSG00000127884.4|ECHS1|ENST00000368547.3|102799-HCT-15_SNP_RNA-T75I-and-102799-HCT-15_SNP_EXOME-T75I|75i|	ECHS1_p.T75I	75	HCT-15	CAM	FALSE	TRUE	TRUE	TRUE
IFEEDPAVGAIVLTGGDKAFAAGADIK	K	K	FALSE	FALSE	E	27	1	27	3	14	0	NA	P30084	P30084	3A		sp|P30084|ENSG00000127884.4|ECHS1|ENST00000368547.3|102799-HCT-15_SNP_RNA-T75I-and-102799-HCT-15_SNP_EXOME-T75I|75i|	ECHS1_p.T75I	75	HCT-15	CAM	FALSE	TRUE	TRUE	TRUE
IGGTNIGEDIR	C	R	TRUE	FALSE	K	11	27	37	2	2	0	NA	P38919	P38919	3A		sp|P38919|ENSG00000141543.9|EIF4A3|ENST00000269349.7|167882-HCT-15_RARE_RNA-V146I-and-167882-HCT-15_RARE_EXOME-V146I|146i|	EIF4A3_p.V146I	146	HCT-15	CAM	TRUE	FALSE	TRUE	TRUE
IIGLDQVAGMSETALLGAFK	R	K	FALSE	FALSE	T	20	1	20	2	6	0	10M(15.9949)	P35579	P35579	3A		sp|P35579-1|ENSG00000100345.21|MYH9|ENST00000216181.10|195651-HCT-15_RARE_RNA-P633L-and-195651-HCT-15_RARE_EXOME-P633L|633l|	MYH9_p.P633L	633	HCT-15	CAM	TRUE	FALSE	TRUE	TRUE
IIVDANNLTVEIENELNIIHK	R	K	FALSE	FALSE	F	21	18	38	3	4	0	NA	Q8WWY3	Q8WWY3	3A		sp|Q8WWY3-1|ENSG00000105618.13|PRPF31|ENST00000321030.8|177991-HCT-15_RARE_RNA-V92I-and-177991-HCT-15_RARE_EXOME-V92I|92i|	PRPF31_p.V92I	92	HCT-15	CAM	TRUE	FALSE	TRUE	TRUE
ILLQDVGGGSWAELGR	C	R	TRUE	FALSE	T	16	1	16	2	1	0	NA	Q99829	Q99829	3A		sp|Q99829|ENSG00000214078.12|CPNE1|ENST00000352393.8|188439-HCT-15_SNP_RNA-V31I-and-188439-HCT-15_SNP_EXOME-V31I|31i|	CPNE1_p.V31I	31	HCT-15	CAM	FALSE	TRUE	TRUE	TRUE
IMQDQSEGNSLQNQALQTLQER	R	R	FALSE	FALSE	L	22	5	26	2	1	0	NA	Q8TBA6	Q8TBA6	3A		sp|Q8TBA6-1|ENSG00000066455.12|GOLGA5|ENST00000163416.6|133396-HCT-15_SNP_RNA-F350L-and-133396-HCT-15_SNP_EXOME-F350L|350l|	GOLGA5_p.F350L	350	HCT-15	CAM	FALSE	TRUE	TRUE	TRUE
INAGMYILSPAVLR	K	R	FALSE	FALSE	R	14	11	24	2	2	0	NA	Q9Y5P6	Q9Y5P6	3A		sp|Q9Y5P6-1|ENSG00000173540.12|GMPPB|ENST00000480687.5|41018-HCT-15_SNP_RNA-Q184R-and-41018-HCT-15_SNP_EXOME-Q184R|184r|	GMPPB_p.Q184R	184	HCT-15	CAM	FALSE	TRUE	TRUE	TRUE
IQPEDMFVYDINEK	R	K	FALSE	FALSE	D	14	1	14	2	1	0	NA	Q96GX9	Q96GX9	3A		sp|Q96GX9-1|ENSG00000149089.12|APIP|ENST00000395787.3|111040-HCT-15_SNP_RNA-C76Y-and-111040-HCT-15_SNP_EXOME-C76Y|76y|	APIP_p.C76Y	76	HCT-15	CAM	FALSE	TRUE	TRUE	TRUE
ISDGVFPGMSGPPLVLR	C	R	TRUE	FALSE	R	17	15	31	2	1	0	NA	Q5JTZ9	Q5JTZ9	3A		sp|Q5JTZ9|ENSG00000124608.4|AARS2|ENST00000244571.4|69127-HCT-15_SNP_RNA-I339V-and-69127-HCT-15_SNP_EXOME-I339V|339v|	AARS2_p.I339V	339	HCT-15	CAM	FALSE	TRUE	TRUE	TRUE
ISYGPDWKDFYVVEPLAFEGTPEQK	R	K	FALSE	FALSE	A	25	3	27	3	7	0	NA	P06865	P06865	3A		sp|P06865-1|ENSG00000213614.9|HEXA|ENST00000268097.9|144124-HCT-15_SNP_RNA-I436V-and-144124-HCT-15_SNP_EXOME-I436V|436v|	HEXA_p.I436V	436	HCT-15	CAM	FALSE	TRUE	TRUE	TRUE
ITDAYLDQYLR	K	R	FALSE	FALSE	Y	11	27	37	2	3	0	NA	Q6P2Q9	Q6P2Q9	3A		sp|Q6P2Q9|ENSG00000174231.16|PRPF8|ENST00000572621.5|162017-HCT-15_RARE_RNA-W927R-and-162017-HCT-15_RARE_EXOME-W927R|927r|	PRPF8_p.W927R	927	HCT-15	CAM	TRUE	FALSE	TRUE	TRUE
ITGEAFMQFASQELAEK	K	K	FALSE	FALSE	A	17	29	45	2	7	0	NA	P52597	P52597	3A		sp|P52597|ENSG00000169813.16|HNRNPF|ENST00000443950.6|100445-HCT-15_SNP_RNA-V157M-and-100445-HCT-15_SNP_EXOME-V157M|157m|	HNRNPF_p.V157M	157	HCT-15	CAM	FALSE	TRUE	TRUE	TRUE
KAAVPAPEEEMDECEQALAAEPK	K	K	FALSE	FALSE	A	23	7	29	3	3	0	NA	P26641	P26641	3A	266	sp|P26641-1|ENSG00000254772.9|EEF1G|ENST00000329251.4|112031-HCT-15_RARE_RNA-A256V-and-112031-HCT-15_RARE_EXOME-A256V|256v|	EEF1G_p.A256V	256	HCT-15	CAM	TRUE	FALSE	TRUE	TRUE
KAFSEYLGTDQSK	K	K	FALSE	FALSE	W	13	21	33	2	5	0	NA	P10768	P10768	3A		sp|P10768|ENSG00000139684.13|ESD|ENST00000378720.7|129610-HCT-15_SNP_RNA-G190E-and-129610-HCT-15_SNP_EXOME-G190E|190e|	ESD_p.G190E	190	HCT-15	CAM	FALSE	TRUE	TRUE	TRUE
KAPPMPGPVPEAAQPFLFTPR	R	R	FALSE	FALSE	G	21	1	21	3	1	0	NA	Q7Z406	Q7Z406	3A		sp|Q7Z406-1|ENSG00000105357.16|MYH14|ENST00000376970.6|177517-HCT-15_RARE_RNA-R16M-and-177517-HCT-15_RARE_EXOME-R16M|16m|	MYH14_p.R16M	16	HCT-15	CAM	TRUE	FALSE	TRUE	TRUE
KDFVSEQLTSLLVNEVQLPALGENK	R	K	FALSE	FALSE	K	25	17	41	3	1	0	NA	P54136	P54136	3A		sp|P54136-1|ENSG00000113643.8|RARS|ENST00000231572.7|57480-HCT-15_RARE_RNA-G182E-and-57480-HCT-15_RARE_EXOME-G182E|182e|	RARS_p.G182E	182	HCT-15	CAM	TRUE	FALSE	TRUE	TRUE
KEFSPFGTITSANVMMEGGR	R	R	FALSE	FALSE	S	20	1	20	3	2	0	NA	Q9H361	Q9H361	3A		sp|Q9H361|ENSG00000151846.8|PABPC3|ENST00000281589.4|127260-HCT-15_RARE_RNA-K324N,127260-HCT-15_RARE_RNA-A313E|313e324n|;sp|P11940-1|ENSG00000070756.15|PABPC1|ENST00000318607.9|87770-HCT-15_RARE_EXOME-K324N|324n|	PABPC3_p.K324N,A313E;PABPC1_p.K324N	324,313;324	HCT-15	CAM	TRUE	FALSE	TRUE	TRUE
KFAEAFEDIPR	K	R	FALSE	FALSE	A	11	21	31	2	1	0	NA	P50990	P50990	3A		sp|P50990-1|ENSG00000156261.12|CCT8|ENST00000286788.8|191141-HCT-15_RARE_RNA-A447D-and-191141-HCT-15_RARE_EXOME-A447D|447d|	CCT8_p.A447D	447	HCT-15	CAM	TRUE	FALSE	TRUE	TRUE
KFDDAVVQSDMK	R	K	FALSE	FALSE	H	12	8	19	2, 3	20	0	11M(15.9949)	P11142	P11142	3A		sp|P11142-1|ENSG00000109971.13|HSPA8|ENST00000532636.5|115059-HCT-15_RARE_RNA-R77K-and-115059-HCT-15_RARE_EXOME-R77K|77k|	HSPA8_p.R77K	77	HCT-15	CAM	TRUE	FALSE	TRUE	TRUE
KFDVNASAVQVLIEHIGNLDR	R	R	FALSE	FALSE	A	21	30	50	3	1	0	NA	Q00610	Q00610	3A		sp|Q00610-1|ENSG00000141367.11|CLTC|ENST00000269122.7|160025-HCT-15_RARE_RNA-T1079A-and-160025-HCT-15_RARE_EXOME-T1079A|1079a|	CLTC_p.T1079A	1079	HCT-15	CAM	TRUE	FALSE	TRUE	TRUE
KHTLSFVDVGTGK	R	K	FALSE	FALSE	V	13	1	13	3	2	0	NA	P31040	P31040	3A		sp|P31040-1|ENSG00000073578.16|SDHA|ENST00000264932.10|53319-HCT-15_RARE_RNA-Y629F-and-53319-HCT-15_RARE_EXOME-Y629F|629f|	SDHA_p.Y629F	629	HCT-15	CAM	TRUE	FALSE	TRUE	TRUE
KIDAAQNWFADPNGGPEGEEQIR	K	R	FALSE	FALSE	G	23	8	30	3	4	0	NA	P18206	P18206	3A		sp|P18206-1|ENSG00000035403.17|VCL|ENST00000211998.9|97891-HCT-15_RARE_EXOME-L395F|395f|	VCL_p.L395F	395	HCT-15	CAM	TRUE	FALSE	FALSE	TRUE
KLGITPEGQSYLDQFR	R	R	FALSE	FALSE	Q	16	6	21	3	1	0	NA	Q2M389	Q2M389	3A		sp|Q2M389-1|ENSG00000136051.14|WASHC4|ENST00000332180.9|119892-HCT-15_SNP_RNA-V901I-and-119892-HCT-15_SNP_EXOME-V901I|901i|	WASHC4_p.V901I	901	HCT-15	CAM	FALSE	TRUE	TRUE	TRUE
KPEDVLDDDGAGSAPLK	R	K	FALSE	FALSE	S	17	33	49	3	1	0	NA	P35613	P35613	3A		sp|P35613-1|ENSG00000172270.19|BSG|ENST00000333511.8|172215-HCT-15_RARE_EXOME-D359G|359g|	BSG_p.D359G	359	HCT-15	CAM	TRUE	FALSE	FALSE	TRUE
KSQIFSIASDNQPTVTIK	K	K	FALSE	FALSE	V	18	10	27	3	4	0	NA	P11021	P11021	3A		sp|P11021|ENSG00000044574.7|HSPA5|ENST00000324460.6|95250-HCT-15_RARE_RNA-T453I-and-95250-HCT-15_RARE_EXOME-T453I|453i|	HSPA5_p.T453I	453	HCT-15	CAM	TRUE	FALSE	TRUE	TRUE
KVSVVDYVEPSPQGTR	R	R	FALSE	FALSE	W	16	10	25	3	4	0	NA	Q9NNW7	Q9NNW7	3A		sp|Q9NNW7-1|ENSG00000184470.20|TXNRD2|ENST00000400521.6|194642-HCT-15_SNP_EXOME-A66S|66s|	TXNRD2_p.A66S	66	HCT-15	CAM	FALSE	TRUE	FALSE	TRUE
KYTLPPGVDPAQVSSSLSPEGTLTVEAPMPK	R	K	FALSE	FALSE	L	31	7	37	3	15	0	29M(15.9949)	P04792	P04792	3A		sp|P04792|ENSG00000106211.8|HSPB1|ENST00000248553.6|73783-HCT-15_RARE_RNA-T151A-and-73783-HCT-15_RARE_EXOME-T151A|151a|	HSPB1_p.T151A	151	HCT-15	CAM	TRUE	FALSE	TRUE	TRUE
LAALALASSENSSSTPEECEETSEKPK	R	K	FALSE	FALSE	K	27	1	27	4	1	0	19C(56.0374)	O00567	O00567	3A	472	sp|O00567|ENSG00000101361.16|NOP56|ENST00000329276.9|185156-HCT-15_SNP_RNA-M475T-and-185156-HCT-15_SNP_EXOME-M475T|475t|	NOP56_p.M475T	475	HCT-15	CAM	FALSE	TRUE	TRUE	TRUE
LADDVDLEQVSNETHGHVGADLAALCSEAALQAIR	K	R	FALSE	FALSE	K	35	6	40	5	1	0	26C(56.0374)	P55072	P55072	3A	415	sp|P55072|ENSG00000165280.15|VCP|ENST00000358901.10|93504-HCT-15_RARE_EXOME-A400S|400s|	VCP_p.A400S	400	HCT-15	CAM	TRUE	FALSE	FALSE	TRUE
LCFVALDFEQEMAMAASSSSLEK	K	K	FALSE	FALSE	S	23	1	23	2	1	0	12M(15.9949)	P0CG38	P0CG38	3A	917	sp|P0CG38|ENSG00000196834.11|POTEI|ENST00000451531.6|29623-HCT-15_SNP_EXOME-Y918F|918f|	POTEI_p.Y918F	918	HCT-15	CAM	FALSE	TRUE	FALSE	TRUE
LCYVALDFDQEMAMVASSSSLEK	K	K	FALSE	FALSE	S	23	1	23	2	1	0	2C(56.0374)	P0CG39	P0CG39	3A	880	sp|P0CG39|ENSG00000222038.3|POTEJ|ENST00000409602.1|21958-HCT-15_RARE_EXOME-E887D|887d|	POTEJ_p.E887D	887	HCT-15	CAM	TRUE	FALSE	FALSE	TRUE
LCYVALDFEQEMAIAASSSSLEK	K	K	FALSE	FALSE	S	23	1	23	3	1	0	2C(56.0374)	P0CG38	P0CG38	3A	917	sp|P0CG38|ENSG00000196834.11|POTEI|ENST00000451531.6|29623-HCT-15_SNP_EXOME-M929I|929i|	POTEI_p.M929I	929	HCT-15	CAM	FALSE	TRUE	FALSE	TRUE
LEAVSHTSDMHSGYADSPSK	R	K	FALSE	FALSE	A	20	1	20	3, 4	8	0	NA	Q01518	Q01518	3A		sp|Q01518-1|ENSG00000131236.16|CAP1|ENST00000372797.7|2315-HCT-15_RARE_RNA-R29S-and-2315-HCT-15_RARE_EXOME-R29S|29s|	CAP1_p.R29S	29	HCT-15	CAM	TRUE	FALSE	TRUE	TRUE
LEGILEGLGLR	R	R	FALSE	FALSE	E	11	13	23	2	3	0	NA	Q9BSH5	Q9BSH5	3A		sp|Q9BSH5|ENSG00000119431.9|HDHD3|ENST00000238379.9|94947-HCT-15_SNP_RNA-G146E-and-94947-HCT-15_SNP_EXOME-G146E|146e|	HDHD3_p.G146E	146	HCT-15	CAM	FALSE	TRUE	TRUE	TRUE
LEQDLSIIQSIQRPDAEGATEHR	R	R	FALSE	FALSE	L	23	1	23	4	1	0	NA	Q13948	Q13948	3A		sp|Q13948-1|ENSG00000257923.10|CUX1|ENST00000292538.9|74767-HCT-15_SNP_RNA-A464T-and-74767-HCT-15_SNP_EXOME-A464T|464t|	CUX1_p.A464T	464	HCT-15	CAM	FALSE	TRUE	TRUE	TRUE
LFDFQGLQHQVAHVSTQLEAAR	R	R	FALSE	FALSE	L	22	9	30	3, 4	3	0	NA	P45954	P45954	3A		sp|P45954-1|ENSG00000196177.12|ACADSB|ENST00000358776.6|99302-HCT-15_RARE_RNA-A340S-and-99302-HCT-15_RARE_EXOME-A340S|340s|	ACADSB_p.A340S	340	HCT-15	CAM	TRUE	FALSE	TRUE	TRUE
LGDHLLFASGDQVFQVPIR	R	R	FALSE	FALSE	G	19	7	25	3	1	0	NA	Q04912	Q04912	3A		sp|Q04912-1|ENSG00000164078.12|MST1R|ENST00000296474.7|41080-HCT-15_SNP_RNA-Q523R-and-41080-HCT-15_SNP_EXOME-Q523R|523r|	MST1R_p.Q523R	523	HCT-15	CAM	FALSE	TRUE	TRUE	TRUE
LGGTTDDCELVEGLVLTQK	K	K	FALSE	FALSE	V	19	7	25	3	3	0	8C(56.0374)	P50991	P50991	3A	221	sp|P50991-1|ENSG00000115484.14|CCT4|ENST00000394440.7|27519-HCT-15_RARE_EXOME-I218T|218t|	CCT4_p.I218T	218	HCT-15	CAM	TRUE	FALSE	FALSE	TRUE
LGITPEGQSYLDQFR	K	R	FALSE	FALSE	Q	15	7	21	2	2	0	NA	Q2M389	Q2M389	3A		sp|Q2M389-1|ENSG00000136051.14|WASHC4|ENST00000332180.9|119892-HCT-15_SNP_RNA-V901I-and-119892-HCT-15_SNP_EXOME-V901I|901i|	WASHC4_p.V901I	901	HCT-15	CAM	FALSE	TRUE	TRUE	TRUE
LGPGGLDPVEVYESLHEELQ	R	Q	FALSE	FALSE	K	20	13	32	2	2	0	NA	Q16543	Q16543	3A		sp|Q16543|ENSG00000105401.8|CDC37|ENST00000222005.6|180096-HCT-15_RARE_EXOME-P302H|302h|	CDC37_p.P302H	302	HCT-15	CAM	TRUE	FALSE	FALSE	TRUE
LGPGGLDPVEVYESLHEELQK	R	K	FALSE	FALSE	C	21	13	33	3	11	0	NA	Q16543	Q16543	3A		sp|Q16543|ENSG00000105401.8|CDC37|ENST00000222005.6|180096-HCT-15_RARE_EXOME-P302H|302h|	CDC37_p.P302H	302	HCT-15	CAM	TRUE	FALSE	FALSE	TRUE
LHAGPETQALPAFSDLEALSLSTLYSLQK	R	K	FALSE	FALSE	Q	29	11	39	3	2	0	NA	Q9C0B0	Q9C0B0	3A		sp|Q9C0B0|ENSG00000132478.9|UNK|ENST00000589666.5|160936-HCT-15_RARE_RNA-P726T-and-160936-HCT-15_RARE_EXOME-P726T|726t|	UNK_p.P726T	726	HCT-15	CAM	TRUE	FALSE	TRUE	TRUE
LHIHIAEISK	K	K	FALSE	FALSE	L	10	5	14	3	4	0	NA	Q56VL3	Q56VL3	3A		sp|Q56VL3-1|ENSG00000145247.11|OCIAD2|ENST00000508632.5|50282-HCT-15_RARE_RNA-R36I-and-50282-HCT-15_RARE_EXOME-R36I|36i|	OCIAD2_p.R36I	36	HCT-15	CAM	TRUE	FALSE	TRUE	TRUE
LIDIPDPVPALDLGQQLQLK	R	K	FALSE	FALSE	V	20	15	34	2	5	0	NA	Q13948	Q13948	3A		sp|Q13948-1|ENSG00000257923.10|CUX1|ENST00000292538.9|74767-HCT-15_RARE_EXOME-V99I|99i|;sp|P39880-1|ENSG00000257923.10|CUX1|ENST00000546411.7|74775-HCT-15_RARE_EXOME-V88I|88i|	CUX1_p.V99I;CUX1_p.V88I	99;88	HCT-15	CAM	TRUE	FALSE	FALSE	TRUE
LIHVMLMDNSTPQSEGGTLK	R	K	FALSE	FALSE	A	20	8	27	3	1	0	NA	Q7LBC6	Q7LBC6	3A		sp|Q7LBC6-1|ENSG00000120733.13|KDM3B|ENST00000314358.9|56317-HCT-15_SNP_RNA-A256T-and-56317-HCT-15_SNP_EXOME-A256T|256t|	KDM3B_p.A256T	256	HCT-15	CAM	FALSE	TRUE	TRUE	TRUE
LKDWQEGGHTINDKPNPR	K	R	FALSE	FALSE	G	18	3	20	4	3	0	NA	O60488	O60488	3A		sp|O60488-1|ENSG00000068366.19|ACSL4|ENST00000469796.6|201818-HCT-15_RARE_EXOME-Y507H|507h|	ACSL4_p.Y507H	507	HCT-15	CAM	TRUE	FALSE	FALSE	TRUE
LLDTVDDMLANDIVR	K	R	FALSE	FALSE	L	15	5	19	2	3	0	NA	Q9H4M9	Q9H4M9	3A		sp|Q9H4M9|ENSG00000110047.17|EHD1|ENST00000320631.7|112450-HCT-15_RARE_RNA-A391V-and-112450-HCT-15_RARE_EXOME-A391V|391v|	EHD1_p.A391V	391	HCT-15	CAM	TRUE	FALSE	TRUE	TRUE
LLLPGELANHAVSEGTK	R	K	FALSE	FALSE	A	17	10	26	2, 3	15	0	NA	Q99880	Q99880	3A		sp|Q99880|ENSG00000185130.5|HIST1H2BL|ENST00000377401.3|67796-HCT-15_RARE_RNA-K109N-and-67796-HCT-15_RARE_EXOME-K109N|109n|	HIST1H2BL_p.K109N	109	HCT-15	CAM	TRUE	FALSE	TRUE	TRUE
LLPHGLAVYASPENK	R	K	FALSE	FALSE	K	15	1	15	3	5	0	NA	Q9BYD2	Q9BYD2	3A		sp|Q9BYD2|ENSG00000143436.10|MRPL9|ENST00000368830.7|14679-HCT-15_RARE_RNA-Q126H-and-14679-HCT-15_RARE_EXOME-Q126H|126h|	MRPL9_p.Q126H	126	HCT-15	CAM	TRUE	FALSE	TRUE	TRUE
LLPHGLAVYASPENKK	R	K	FALSE	FALSE	L	16	1	16	3	1	0	NA	Q9BYD2	Q9BYD2	3A		sp|Q9BYD2|ENSG00000143436.10|MRPL9|ENST00000368830.7|14679-HCT-15_RARE_RNA-Q126H-and-14679-HCT-15_RARE_EXOME-Q126H|126h|	MRPL9_p.Q126H	126	HCT-15	CAM	TRUE	FALSE	TRUE	TRUE
LLQAQAAGVDWR	R	R	FALSE	FALSE	E	12	1	12	2	2	0	NA	Q5SY16	Q5SY16	3A		sp|Q5SY16|ENSG00000162408.10|NOL9|ENST00000377705.5|9966-HCT-15_SNP_EXOME-S58A|58a|	NOL9_p.S58A	58	HCT-15	CAM	FALSE	TRUE	FALSE	TRUE
LLQDLQLGDEEDAWK	R	K	FALSE	FALSE	R	15	1	15	2	2	0	NA	Q14692	Q14692	3A		sp|Q14692|ENSG00000165733.7|BMS1|ENST00000374518.5|97133-HCT-15_SNP_RNA-R38W-and-97133-HCT-15_SNP_EXOME-R38W|38w|	BMS1_p.R38W	38	HCT-15	CAM	FALSE	TRUE	TRUE	TRUE
LLQDLQLGDEEDAWKR	R	R	FALSE	FALSE	N	16	1	16	3	1	0	NA	Q14692	Q14692	3A		sp|Q14692|ENSG00000165733.7|BMS1|ENST00000374518.5|97133-HCT-15_SNP_RNA-R38W-and-97133-HCT-15_SNP_EXOME-R38W|38w|	BMS1_p.R38W	38	HCT-15	CAM	FALSE	TRUE	TRUE	TRUE
LLSDLLPPSTGTFQEAQSR	R	R	FALSE	FALSE	L	19	11	29	2	7	0	NA	Q9Y490	Q9Y490	3A		sp|Q9Y490|ENSG00000137076.20|TLN1|ENST00000314888.9|93585-HCT-15_SNP_EXOME-S1227L|1227l|	TLN1_p.S1227L	1227	HCT-15	CAM	FALSE	TRUE	FALSE	TRUE
LLTQDEGPALVPGSR	R	R	FALSE	FALSE	L	15	7	21	2	1	0	NA	Q5T440	Q5T440	3A		sp|Q5T440|ENSG00000181873.12|IBA57|ENST00000366711.3|8718-HCT-15_SNP_RNA-G211S-and-8718-HCT-15_SNP_EXOME-G211S|211s|	IBA57_p.G211S	211	HCT-15	CAM	FALSE	TRUE	TRUE	TRUE
LNATEEMLQQELLSR	K	R	FALSE	FALSE	T	15	5	19	2	1	0	NA	Q86W92	Q86W92	3A		sp|Q86W92-1|ENSG00000110841.13|PPFIBP1|ENST00000318304.12|116846-HCT-15_SNP_RNA-V148L-and-116846-HCT-15_SNP_EXOME-V148L|148l|	PPFIBP1_p.V148L	148	HCT-15	CAM	FALSE	TRUE	TRUE	TRUE
LNLPINIIGLAPLCENIPSGK	K	K	FALSE	FALSE	A	21	21	41	2, 3	3	0	14C(56.0374)	P28838	P28838	3A	335	sp|P28838-1|ENSG00000002549.12|LAP3|ENST00000226299.8|45960-HCT-15_RARE_RNA-M338I-and-45960-HCT-15_RARE_EXOME-M338I|338i|	LAP3_p.M338I	338	HCT-15	CAM	TRUE	FALSE	TRUE	TRUE
LPAEPITR	K	R	FALSE	FALSE	W	8	15	22	2	2	0	NA	Q9BYD2	Q9BYD2	3A		sp|Q9BYD2|ENSG00000143436.10|MRPL9|ENST00000368830.7|14679-HCT-15_SNP_RNA-E210A-and-14679-HCT-15_SNP_EXOME-E210A|210a|	MRPL9_p.E210A	210	HCT-15	CAM	FALSE	TRUE	TRUE	TRUE
LPGELANHAVSEGTK	L	K	FALSE	FALSE	A	15	12	26	2, 3	2	0	NA	Q99880	Q99880	3A		sp|Q99880|ENSG00000185130.5|HIST1H2BL|ENST00000377401.3|67796-HCT-15_RARE_RNA-K109N-and-67796-HCT-15_RARE_EXOME-K109N|109n|	HIST1H2BL_p.K109N	109	HCT-15	CAM	TRUE	FALSE	TRUE	TRUE
LPLQANVYPMPTMAYIQDAK	K	K	FALSE	FALSE	H	20	8	27	2	1	0	NA	Q16706	Q16706	3A		sp|Q16706|ENSG00000112893.9|MAN2A1|ENST00000261483.4|55536-HCT-15_RARE_RNA-T920P-and-55536-HCT-15_RARE_EXOME-T920P|920p|	MAN2A1_p.T920P	920	HCT-15	CAM	TRUE	FALSE	TRUE	TRUE
LQPPSGTELLAFNPIVHPSAITQVLLLANPQK	K	K	FALSE	FALSE	E	32	5	36	3	1	0	NA	Q9UJY5	Q9UJY5	3A		sp|Q9UJY5-1|ENSG00000100083.18|GGA1|ENST00000343632.8|193521-HCT-15_RARE_RNA-P581L-and-193521-HCT-15_RARE_EXOME-P581L|581l|	GGA1_p.P581L	581	HCT-15	CAM	TRUE	FALSE	TRUE	TRUE
LQQEANLLQLK	K	K	FALSE	FALSE	S	11	1	11	2	6	0	NA	Q15149	Q15149	3A		sp|Q15149-1|ENSG00000178209.14|PLEC|ENST00000322810.8|89058-HCT-15_RARE_RNA-K2604N-and-89058-HCT-15_RARE_EXOME-K2604N|2604n|	PLEC_p.K2604N	2604	HCT-15	CAM	TRUE	FALSE	TRUE	TRUE
LQQLPADFGHLVNLQHLDLLNNK	K	K	FALSE	FALSE	L	23	1	23	3, 4	5	0	NA	Q96AG4	Q96AG4	3A		sp|Q96AG4|ENSG00000108829.9|LRRC59|ENST00000225972.7|166134-HCT-15_RARE_RNA-R83H-and-166134-HCT-15_RARE_EXOME-R83H|83h|	LRRC59_p.R83H	83	HCT-15	CAM	TRUE	FALSE	TRUE	TRUE
LSPYALAFMPPGYEEDMK	K	K	FALSE	FALSE	L	18	8	25	2	3	0	NA	Q9BXJ9	Q9BXJ9	3A		sp|Q9BXJ9-1|ENSG00000164134.12|NAA15|ENST00000296543.9|48202-HCT-15_RARE_RNA-F832S-and-48202-HCT-15_RARE_EXOME-F832S|832s|	NAA15_p.F832S	832	HCT-15	CAM	TRUE	FALSE	TRUE	TRUE
LSVTWPEGDELLPNEIRPAGTPIGALR	R	R	FALSE	FALSE	L	27	7	33	3	4	0	NA	A6NHR9	A6NHR9	3A		sp|A6NHR9-1|ENSG00000101596.15|SMCHD1|ENST00000320876.10|168508-HCT-15_SNP_RNA-V708I-and-168508-HCT-15_SNP_EXOME-V708I|708i|	SMCHD1_p.V708I	708	HCT-15	CAM	FALSE	TRUE	TRUE	TRUE
LTQAQIFDYSEIPNFPR	K	R	FALSE	FALSE	S	17	20	36	2	1	0	NA	P00491	P00491	3A		sp|P00491|ENSG00000198805.11|PNP|ENST00000361505.9|130606-HCT-15_SNP_RNA-G51S-and-130606-HCT-15_SNP_EXOME-G51S|51s|	PNP_p.G51S	51	HCT-15	CAM	FALSE	TRUE	TRUE	TRUE
LVGLEDPSVR	R	R	FALSE	FALSE	E	10	11	20	2	1	0	NA	Q8NBN7	Q8NBN7	3A		sp|Q8NBN7-1|ENSG00000160439.15|RDH13|ENST00000415061.7|184609-HCT-15_RARE_RNA-A321D-and-184609-HCT-15_RARE_EXOME-A321D|321d|	RDH13_p.A321D	321	HCT-15	CAM	TRUE	FALSE	TRUE	TRUE
LVVVGAGDVGK	K	K	FALSE	FALSE	S	11	6	16	2	6	0	NA	P01116	P01116	3A		sp|P01116-1|ENSG00000133703.11|KRAS|ENST00000256078.8|122572-HCT-15_RARE_RNA-G13D-and-122572-HCT-15_RARE_EXOME-G13D|13d|	KRAS_p.G13D	13	HCT-15	CAM	TRUE	FALSE	TRUE	TRUE
LWPDANSAYQDTLEFLMASR	K	R	FALSE	FALSE	D	20	1	20	2	1	0	NA	Q9Y4F1	Q9Y4F1	3A		sp|Q9Y4F1-1|ENSG00000152767.16|FARP1|ENST00000319562.10|128412-HCT-15_RARE_RNA-R281W-and-128412-HCT-15_RARE_EXOME-R281W|281w|	FARP1_p.R281W	281	HCT-15	CAM	TRUE	FALSE	TRUE	TRUE
MADALDNYVVR	R	R	FALSE	FALSE	G	11	9	19	2	2	0	NA	P05165	P05165	3A		sp|P05165-1|ENSG00000175198.16|PCCA|ENST00000376285.5|128499-HCT-15_SNP_EXOME-I475V|475v|	PCCA_p.I475V	475	HCT-15	CAM	FALSE	TRUE	FALSE	TRUE
MDAVNAFNQELFSLMNMKPPISR	-	R	FALSE	FALSE	A	23	1	23	2	2	0	N-term(42.0106)	O95104	O95104	3A		sp|O95104-1|ENSG00000156304.14|SCAF4|ENST00000286835.11|191214-HCT-15_RARE_RNA-D16N-and-191214-HCT-15_RARE_EXOME-D16N|16n|	SCAF4_p.D16N	16	HCT-15	CAM	TRUE	FALSE	TRUE	TRUE
MDSGDGVTHTVPINEGNALPHATLRLDLAGR	V	R	FALSE	FALSE	E	31	1	31	3	1	0	NA	Q6S8J3	Q6S8J3	3A		sp|Q6S8J3-1|ENSG00000188219.14|POTEE|ENST00000356920.9|22005-HCT-15_RARE_EXOME-Y866N|866n|	POTEE_p.Y866N	866	HCT-15	CAM	TRUE	FALSE	FALSE	TRUE
MEAVVNLYQEVMNHADPR	-	R	FALSE	FALSE	L	18	1	18	2, 3	16	0	12M(15.9949), N-term(42.0106)	Q9BW60	Q9BW60	3A		sp|Q9BW60-1|ENSG00000066322.14|ELOVL1|ENST00000372458.7|11828-HCT-15_RARE_RNA-K13N-and-11828-HCT-15_RARE_EXOME-K13N|13n|	ELOVL1_p.K13N	13	HCT-15	CAM	TRUE	FALSE	TRUE	TRUE
MEEPGATPQPYLGLLLEELR	-	R	FALSE	FALSE	R	20	0	19	2	1	0	N-term(42.0106)	O15320	O15320	3A		sp|O15320-1|ENSG00000150527.17|MIA2|ENST00000280083.7|131634-HCT-15_SNP_RNA-V6A-and-131634-HCT-15_SNP_EXOME-V6A|6a|	MIA2_p.V6A	6	HCT-15	CAM	FALSE	TRUE	TRUE	TRUE
MEEPGATPQPYLGLLLEELRR	-	R	FALSE	FALSE	V	21	0	20	2	1	0	N-term(42.0106)	O15320	O15320	3A		sp|O15320-1|ENSG00000150527.17|MIA2|ENST00000280083.7|131634-HCT-15_SNP_RNA-V6A-and-131634-HCT-15_SNP_EXOME-V6A|6a|	MIA2_p.V6A	6	HCT-15	CAM	FALSE	TRUE	TRUE	TRUE
NAINTEMYHEIMHALK	K	K	FALSE	FALSE	A	16	7	22	3	6	0	12M(15.9949), 7M(15.9949)	O75521	O75521	3A		sp|O75521-1|ENSG00000198721.12|ECI2|ENST00000380118.7|67283-HCT-15_RARE_RNA-R174H-and-67283-HCT-15_RARE_EXOME-R174H|174h|	ECI2_p.R174H	174	HCT-15	CAM	TRUE	FALSE	TRUE	TRUE
NELLPLSPLSPTMEEEPLVIFLSGEDDPEKIEER	R	R	FALSE	FALSE	K	34	16	49	3	7	0	13M(15.9949)	O60343	O60343	3A		sp|O60343-1|ENSG00000136111.12|TBC1D4|ENST00000377636.7|129958-HCT-15_SNP_RNA-V819I-and-129958-HCT-15_SNP_EXOME-V819I|819i|	TBC1D4_p.V819I	819	HCT-15	CAM	FALSE	TRUE	TRUE	TRUE
NFGAENPDPFVPVLSTAVK	K	K	FALSE	FALSE	L	19	1	19	2	1	0	NA	Q9H583	Q9H583	3A		sp|Q9H583|ENSG00000119285.10|HEATR1|ENST00000366582.7|17722-HCT-15_SNP_RNA-N1694S-and-17722-HCT-15_SNP_EXOME-N1694S|1694s|	HEATR1_p.N1694S	1694	HCT-15	CAM	FALSE	TRUE	TRUE	TRUE
NGQGDAPPTPPPTPVDLELEWVLGK	R	K	FALSE	FALSE	M	25	9	33	2	3	0	NA	O15067	O15067	3A		sp|O15067|ENSG00000178921.13|PFAS|ENST00000314666.10|156540-HCT-15_SNP_RNA-L621P-and-156540-HCT-15_SNP_EXOME-L621P|621p|	PFAS_p.L621P	621	HCT-15	CAM	FALSE	TRUE	TRUE	TRUE
NLEMAIADAEQR	A	R	FALSE	FALSE	G	12	14	25	2	2	0	NA	Q86Y46	Q86Y46	3A		sp|Q86Y46-1|ENSG00000186049.8|KRT73|ENST00000305748.7|123712-HCT-15_SNP_EXOME-T376M|376m|	KRT73_p.T376M	376	HCT-15	CAM	FALSE	TRUE	FALSE	TRUE
NSLEFFTMLAQR	R	R	FALSE	FALSE	R	12	10	21	2	3	0	NA	Q9BVP2	Q9BVP2	3A		sp|Q9BVP2-1|ENSG00000163938.16|GNL3|ENST00000418458.5|35128-HCT-15_SNP_RNA-V367M-and-35128-HCT-15_SNP_EXOME-V367M|367m|	GNL3_p.V367M	367	HCT-15	CAM	FALSE	TRUE	TRUE	TRUE
NTVLATWQPYSTSK	K	K	FALSE	FALSE	D	14	12	25	2	3	0	NA	Q9BY44	Q9BY44	3A		sp|Q9BY44-1|ENSG00000144895.11|EIF2A|ENST00000460851.5|37365-HCT-15_SNP_EXOME-T97S|97s|	EIF2A_p.T97S	97	HCT-15	CAM	FALSE	TRUE	FALSE	TRUE
NVVYPLYQLGGPQLR	R	R	FALSE	FALSE	V	15	1	15	2	4	0	NA	Q16540	Q16540	3A		sp|Q16540|ENSG00000214026.10|MRPL23|ENST00000381519.5|103188-HCT-15_SNP_EXOME-R11Q|11q|	MRPL23_p.R11Q	11	HCT-15	CAM	FALSE	TRUE	FALSE	TRUE
PGELANHAVSEGTK	L	K	FALSE	FALSE	A	14	13	26	2	1	0	NA	Q99880	Q99880	3A		sp|Q99880|ENSG00000185130.5|HIST1H2BL|ENST00000377401.3|67796-HCT-15_RARE_RNA-K109N-and-67796-HCT-15_RARE_EXOME-K109N|109n|	HIST1H2BL_p.K109N	109	HCT-15	CAM	TRUE	FALSE	TRUE	TRUE
PMVPLPMPK	S	K	FALSE	FALSE	K	9	10	18	2	1	0	NA	P43155	P43155	3A		sp|P43155-1|ENSG00000095321.16|CRAT|ENST00000318080.6|95526-HCT-15_SNP_RNA-L372M-and-95526-HCT-15_SNP_EXOME-L372M|372m|	CRAT_p.L372M	372	HCT-15	CAM	FALSE	TRUE	TRUE	TRUE
QAIDDDCNQTGQMTAGFLDWPQGTFASQVMLEGDKLK	K	K	FALSE	FALSE	V	37	11	47	3, 4	8	0	13M(15.9949), 7C(56.0374)	P38117	P38117	3A	131	sp|P38117-1|ENSG00000105379.9|ETFB|ENST00000309244.8|184092-HCT-15_SNP_RNA-T154M-and-184092-HCT-15_SNP_EXOME-T154M|154m|	ETFB_p.T154M	154	HCT-15	CAM	FALSE	TRUE	TRUE	TRUE
QAIDDDCNQTGQMTAGFLDWPQGTFASQVTLEGDNLK	K	K	FALSE	FALSE	V	37	1	37	3	3	0	7C(56.0374)	P38117	P38117	3A	131	sp|P38117-1|ENSG00000105379.9|ETFB|ENST00000309244.8|184092-HCT-15_RARE_RNA-K159N-and-184092-HCT-15_RARE_EXOME-K159N|159n|	ETFB_p.K159N	159	HCT-15	CAM	TRUE	FALSE	TRUE	TRUE
QAIDDDCNQTGQMTAGFLDWPQGTFASQVTLEGDNLKVER	K	R	FALSE	FALSE	E	40	1	40	4	1	0	7C(56.0374)	P38117	P38117	3A	131	sp|P38117-1|ENSG00000105379.9|ETFB|ENST00000309244.8|184092-HCT-15_RARE_RNA-K159N-and-184092-HCT-15_RARE_EXOME-K159N|159n|	ETFB_p.K159N	159	HCT-15	CAM	TRUE	FALSE	TRUE	TRUE
QEPFLLSGGDDGALK	R	K	FALSE	FALSE	L	15	24	38	2	3	0	NA	Q9BQ67	Q9BQ67	3A		sp|Q9BQ67|ENSG00000105447.12|GRWD1|ENST00000253237.9|177102-HCT-15_SNP_RNA-R319Q-and-177102-HCT-15_SNP_EXOME-R319Q|319q|	GRWD1_p.R319Q	319	HCT-15	CAM	FALSE	TRUE	TRUE	TRUE
QGLYELSASSFELHVAQGDHFIK	K	K	FALSE	FALSE	F	23	1	23	4	2	0	NA	Q8NBS9	Q8NBS9	3A		sp|Q8NBS9-1|ENSG00000239264.8|TXNDC5|ENST00000379757.8|67378-HCT-15_RARE_RNA-N198S-and-67378-HCT-15_RARE_EXOME-N198S|198s|	TXNDC5_p.N198S	198	HCT-15	CAM	TRUE	FALSE	TRUE	TRUE
QLATVNEQSLQNGFEELIQWTK	K	K	FALSE	FALSE	E	22	21	42	2	6	0	NA	Q92665	Q92665	3A		sp|Q92665|ENSG00000102738.7|MRPS31|ENST00000323563.7|129436-HCT-15_RARE_RNA-P293S-and-129436-HCT-15_RARE_EXOME-P293S|293s|	MRPS31_p.P293S	293	HCT-15	CAM	TRUE	FALSE	TRUE	TRUE
QQNGIVPIVEPEILPDGGHDLKR	C	R	TRUE	FALSE	C	23	1	23	4	2	0	NA	P04075	P04075	3A		sp|P04075-1|ENSG00000149925.18|ALDOA|ENST00000569545.5|147948-HCT-15_RARE_RNA-D196G-and-147948-HCT-15_RARE_EXOME-D196G|196g|	ALDOA_p.D196G	196	HCT-15	CAM	TRUE	FALSE	TRUE	TRUE
QRAQEALLQLSQALSLMETVK	K	K	FALSE	FALSE	Q	21	1	21	3	1	0	NA	O60664	O60664	3A		sp|O60664-1|ENSG00000105355.8|PLIN3|ENST00000221957.8|179418-HCT-15_SNP_RNA-V275A-and-179418-HCT-15_SNP_EXOME-V275A|275a|	PLIN3_p.V275A	275	HCT-15	CAM	FALSE	TRUE	TRUE	TRUE
QSGGSSQAGAVTVSDVQELMR	R	R	FALSE	FALSE	R	21	8	28	2	6	0	NA	O00233	O00233	3A		sp|O00233-1|ENSG00000110801.13|PSMD9|ENST00000541212.5|120676-HCT-15_SNP_RNA-V17A-and-120676-HCT-15_SNP_EXOME-V17A|17a|	PSMD9_p.V17A	17	HCT-15	CAM	FALSE	TRUE	TRUE	TRUE
REEMEQLFHDDQGSVTR	R	R	FALSE	FALSE	W	17	1	17	3	1	0	NA	Q15643	Q15643	3A		sp|Q15643|ENSG00000100815.12|TRIP11|ENST00000267622.8|137163-HCT-15_SNP_RNA-G1827S-and-137163-HCT-15_SNP_EXOME-G1827S|1827s|	TRIP11_p.G1827S	1827	HCT-15	CAM	FALSE	TRUE	TRUE	TRUE
REPWLLPSQHNDIIQDALGQR	R	R	FALSE	FALSE	Y	21	12	32	4	2	0	NA	Q14697	Q14697	3A		sp|Q14697-1|ENSG00000089597.16|GANAB|ENST00000356638.7|112080-HCT-15_SNP_RNA-R698Q-and-112080-HCT-15_SNP_EXOME-R698Q|698q|	GANAB_p.R698Q	698	HCT-15	CAM	FALSE	TRUE	TRUE	TRUE
RFEHLDPQNQHTFEAR	K	R	FALSE	FALSE	D	16	1	16	3, 4	5	0	NA	Q02818	Q02818	3A		sp|Q02818|ENSG00000104805.15|NUCB1|ENST00000405315.8|177152-HCT-15_RARE_RNA-Q137R-and-177152-HCT-15_RARE_EXOME-Q137R|137r|	NUCB1_p.Q137R	137	HCT-15	CAM	TRUE	FALSE	TRUE	TRUE
RFQTIDIEPDIEALLSQGLS	R	S	FALSE	FALSE	C	20	7	26	2	1	0	NA	P07203	P07203	3A		sp|P07203-1|ENSG00000233276.4|GPX1|ENST00000419783.2|40904-HCT-15_SNP_RNA-P200L-and-40904-HCT-15_SNP_EXOME-P200L|200l|	GPX1_p.P200L	200	HCT-15	CAM	FALSE	TRUE	TRUE	TRUE
RKPEDVLDDDGAGSAPLK	R	K	FALSE	FALSE	S	18	32	49	3	2	0	NA	P35613	P35613	3A		sp|P35613-1|ENSG00000172270.19|BSG|ENST00000333511.8|172215-HCT-15_RARE_EXOME-D359G|359g|	BSG_p.D359G	359	HCT-15	CAM	TRUE	FALSE	FALSE	TRUE
RPDYAPMESSDDEDEEFQFIK	K	K	FALSE	FALSE	K	21	9	29	3	2	0	NA	P55081	P55081	3A		sp|P55081|ENSG00000140259.6|MFAP1|ENST00000267812.3|142760-HCT-15_RARE_RNA-E55D-and-142760-HCT-15_RARE_EXOME-E55D|55d|	MFAP1_p.E55D	55	HCT-15	CAM	TRUE	FALSE	TRUE	TRUE
RVALEELENKPR	K	R	FALSE	FALSE	K	12	1	12	3	1	0	NA	Q5T4S7	Q5T4S7	3A		sp|Q5T4S7-1|ENSG00000127481.14|UBR4|ENST00000375254.7|10433-HCT-15_SNP_RNA-M4867L-and-10433-HCT-15_SNP_EXOME-M4867L|4867l|	UBR4_p.M4867L	4867	HCT-15	CAM	FALSE	TRUE	TRUE	TRUE
RVYGDIIYTPAK	R	K	FALSE	FALSE	D	12	24	35	2	3	0	NA	P51649	P51649	3A		sp|P51649-1|ENSG00000112294.12|ALDH5A1|ENST00000357578.7|63286-HCT-15_SNP_RNA-H180Y-and-63286-HCT-15_SNP_EXOME-H180Y|180y|	ALDH5A1_p.H180Y	180	HCT-15	CAM	FALSE	TRUE	TRUE	TRUE
RYEVPLETPR	R	R	FALSE	FALSE	V	10	1	10	2, 3	3	0	NA	P10253	P10253	3A		sp|P10253|ENSG00000171298.12|GAA|ENST00000390015.7|161319-HCT-15_SNP_RNA-H199R-and-161319-HCT-15_SNP_EXOME-H199R|199r|	GAA_p.H199R	199	HCT-15	CAM	FALSE	TRUE	TRUE	TRUE
SAAEIVQEIENIEK	K	K	FALSE	FALSE	T	14	22	35	2	1	0	NA	Q9NS91	Q9NS91	3A		sp|Q9NS91|ENSG00000070950.9|RAD18|ENST00000264926.6|39234-HCT-15_SNP_RNA-R302Q-and-39234-HCT-15_SNP_EXOME-R302Q|302q|	RAD18_p.R302Q	302	HCT-15	CAM	FALSE	TRUE	TRUE	TRUE
SALFAQINQGESITHALK	R	K	FALSE	FALSE	H	18	1	18	2, 3	13	0	NA	Q01518	Q01518	3A		sp|Q01518-1|ENSG00000131236.16|CAP1|ENST00000372797.7|2315-HCT-15_RARE_RNA-S256A-and-2315-HCT-15_RARE_EXOME-S256A|256a|	CAP1_p.S256A	256	HCT-15	CAM	TRUE	FALSE	TRUE	TRUE
SALQSINEWAAQTTNGK	R	K	FALSE	FALSE	L	17	6	22	2	1	0	NA	P50454	P50454	3A		sp|P50454|ENSG00000149257.13|SERPINH1|ENST00000533603.5|107237-HCT-15_RARE_RNA-D182N-and-107237-HCT-15_RARE_EXOME-D182N|182n|	SERPINH1_p.D182N	182	HCT-15	CAM	TRUE	FALSE	TRUE	TRUE
SALQSINEWAAQTTNGKLPEVTK	R	K	FALSE	FALSE	D	23	6	28	3	3	0	NA	P50454	P50454	3A		sp|P50454|ENSG00000149257.13|SERPINH1|ENST00000533603.5|107237-HCT-15_RARE_RNA-D182N-and-107237-HCT-15_RARE_EXOME-D182N|182n|	SERPINH1_p.D182N	182	HCT-15	CAM	TRUE	FALSE	TRUE	TRUE
SALSGHLETLILGLLK	K	K	FALSE	FALSE	T	16	11	26	2, 3	10	0	NA	P07355	P07355	3A		sp|P07355-1|ENSG00000182718.16|ANXA2|ENST00000396024.7|143450-HCT-15_SNP_RNA-V98L-and-143450-HCT-15_SNP_EXOME-V98L|98l|	ANXA2_p.V98L	98	HCT-15	CAM	FALSE	TRUE	TRUE	TRUE
SCNGPMLVGSPQGGVDIEEVAASNPELIFK	R	K	FALSE	FALSE	E	30	13	42	3	1	0	2C(56.0374), 6M(15.9949)	Q96I99	Q96I99	3A	162	sp|Q96I99-1|ENSG00000172340.14|SUCLG2|ENST00000307227.9|41753-HCT-15_RARE_RNA-V166M-and-41753-HCT-15_RARE_EXOME-V166M|166m|	SUCLG2_p.V166M	166	HCT-15	CAM	TRUE	FALSE	TRUE	TRUE
SDPLCILLQDVGGGSWAELGR	K	R	FALSE	FALSE	T	21	1	21	2, 3	5	0	5C(56.0374)	Q99829	Q99829	3A	30	sp|Q99829|ENSG00000214078.12|CPNE1|ENST00000352393.8|188439-HCT-15_SNP_RNA-V31I-and-188439-HCT-15_SNP_EXOME-V31I|31i|	CPNE1_p.V31I	31	HCT-15	CAM	FALSE	TRUE	TRUE	TRUE
SELPLDPLPLPTEEGNPLLK	K	K	FALSE	FALSE	H	20	13	32	2	11	0	NA	Q15758	Q15758	3A		sp|Q15758-1|ENSG00000105281.12|SLC1A5|ENST00000542575.6|183329-HCT-15_SNP_RNA-V512L-and-183329-HCT-15_SNP_EXOME-V512L|512l|	SLC1A5_p.V512L	512	HCT-15	CAM	FALSE	TRUE	TRUE	TRUE
SFQGPVLIGSSHGGVNIEDVAAETPEAIIK	R	K	FALSE	FALSE	E	30	14	43	3	6	0	NA	Q9P2R7	Q9P2R7	3A		sp|Q9P2R7-1|ENSG00000136143.15|SUCLA2|ENST00000643584.1|129620-HCT-15_SNP_RNA-S199T-and-129620-HCT-15_SNP_EXOME-S199T|199t|	SUCLA2_p.S199T	199	HCT-15	CAM	FALSE	TRUE	TRUE	TRUE
SFQGPVLIGSSHGGVNIEDVAAETPEAIIKEPIDIEEGIK	R	K	FALSE	FALSE	K	40	14	53	4	1	0	NA	Q9P2R7	Q9P2R7	3A		sp|Q9P2R7-1|ENSG00000136143.15|SUCLA2|ENST00000643584.1|129620-HCT-15_SNP_RNA-S199T-and-129620-HCT-15_SNP_EXOME-S199T|199t|	SUCLA2_p.S199T	199	HCT-15	CAM	FALSE	TRUE	TRUE	TRUE
SFQGPVLIGSSHGGVNIEDVAAETPEAIIKEPIDIEEGIKK	R	K	FALSE	FALSE	E	41	14	54	4, 5	7	0	NA	Q9P2R7	Q9P2R7	3A		sp|Q9P2R7-1|ENSG00000136143.15|SUCLA2|ENST00000643584.1|129620-HCT-15_SNP_RNA-S199T-and-129620-HCT-15_SNP_EXOME-S199T|199t|	SUCLA2_p.S199T	199	HCT-15	CAM	FALSE	TRUE	TRUE	TRUE
SFTFVQAGQDLEENMDEDVSEK	K	K	FALSE	FALSE	L	22	1	22	2	2	0	NA	Q96RS6	Q96RS6	3A		sp|Q96RS6-1|ENSG00000120526.10|NUDCD1|ENST00000239690.8|88029-HCT-15_SNP_RNA-L252F-and-88029-HCT-15_SNP_EXOME-L252F,88029-HCT-15_SNP_RNA-I269V-and-88029-HCT-15_SNP_EXOME-I269V|252f269v|	NUDCD1_p.L252F,I269V	252269	HCT-15	CAM	FALSE	TRUE	TRUE	TRUE
SGAHVVVTGPPNAGK	R	K	FALSE	FALSE	S	15	5	19	2, 3	7	0	NA	Q969Y2	Q969Y2	3A		sp|Q969Y2-1|ENSG00000130299.16|GTPBP3|ENST00000324894.12|174357-HCT-15_SNP_RNA-V250A-and-174357-HCT-15_SNP_EXOME-V250A|250a|	GTPBP3_p.V250A	250	HCT-15	CAM	FALSE	TRUE	TRUE	TRUE
SGHIQILLR	K	R	FALSE	FALSE	A	9	6	14	2	2	0	NA	Q9Y3A6	Q9Y3A6	3A		sp|Q9Y3A6-1|ENSG00000117500.12|TMED5|ENST00000370282.7|13293-HCT-15_SNP_RNA-T175I-and-13293-HCT-15_SNP_EXOME-T175I|175i|	TMED5_p.T175I	175	HCT-15	CAM	FALSE	TRUE	TRUE	TRUE
SGNLALAASAVAVDAGMAMAGQSPVLR	Q	R	FALSE	FALSE	L	27	24	50	2	2	0	NA	P26599	P26599	3A		sp|P26599-1|ENSG00000011304.19|PTBP1|ENST00000349038.8|172261-HCT-15_RARE_RNA-A169V-and-172261-HCT-15_RARE_EXOME-A169V|169v|	PTBP1_p.A169V	169	HCT-15	CAM	TRUE	FALSE	TRUE	TRUE
SGVDTDSSYFK	K	K	FALSE	FALSE	L	11	10	20	2	2	0	NA	Q9Y394	Q9Y394	3A		sp|Q9Y394-1|ENSG00000100612.13|DHRS7|ENST00000216500.9|136144-HCT-15_RARE_EXOME-A326T|326t|	DHRS7_p.A326T	326	HCT-15	CAM	TRUE	FALSE	FALSE	TRUE
SIASDNQPTVTIK	F	K	FALSE	FALSE	V	13	15	27	2	1	0	NA	P11021	P11021	3A		sp|P11021|ENSG00000044574.7|HSPA5|ENST00000324460.6|95250-HCT-15_RARE_RNA-T453I-and-95250-HCT-15_RARE_EXOME-T453I|453i|	HSPA5_p.T453I	453	HCT-15	CAM	TRUE	FALSE	TRUE	TRUE
SIDNGMFVQLVQANSPASLVGLR	K	R	FALSE	FALSE	F	23	5	27	2	1	0	NA	O00560	O00560	3A		sp|O00560-1|ENSG00000137575.11|SDCBP|ENST00000260130.8|83161-HCT-15_RARE_EXOME-I136M|136m|	SDCBP_p.I136M	136	HCT-15	CAM	TRUE	FALSE	FALSE	TRUE
SILGLPLLPEDSIK	R	K	FALSE	FALSE	V	14	1	14	2	6	0	NA	Q5VSL9	Q5VSL9	3A		sp|Q5VSL9-1|ENSG00000143093.14|STRIP1|ENST00000369795.7|4699-HCT-15_RARE_RNA-P319L-and-4699-HCT-15_RARE_EXOME-P319L|319l|	STRIP1_p.P319L	319	HCT-15	CAM	TRUE	FALSE	TRUE	TRUE
SLESNLEGLAGVLESDLPNYK	C	K	TRUE	FALSE	S	21	10	30	2	6	0	NA	Q09161	Q09161	3A		sp|Q09161|ENSG00000136937.12|NCBP1|ENST00000375147.7|91061-HCT-15_RARE_RNA-A59S-and-91061-HCT-15_RARE_EXOME-A59S|59s|	NCBP1_p.A59S	59	HCT-15	CAM	TRUE	FALSE	TRUE	TRUE
SLGGNDELSDTFLEMK	K	K	FALSE	FALSE	G	16	1	16	2	1	0	NA	P49792	P49792	3A		sp|P49792|ENSG00000153201.15|RANBP2|ENST00000283195.10|21282-HCT-15_RARE_RNA-A280D-and-21282-HCT-15_RARE_EXOME-A280D|280d|	RANBP2_p.A280D	280	HCT-15	CAM	TRUE	FALSE	TRUE	TRUE
SLSGGVDSAVAALLLR	C	R	TRUE	FALSE	R	16	10	25	2	1	0	NA	O75648	O75648	3A		sp|O75648-1|ENSG00000100416.13|TRMU|ENST00000290846.8|194227-HCT-15_SNP_RNA-A10S-and-194227-HCT-15_SNP_EXOME-A10S|10s|	TRMU_p.A10S	10	HCT-15	CAM	FALSE	TRUE	TRUE	TRUE
SNYSFEKPFLWLAR	K	R	FALSE	FALSE	K	14	15	28	3	2	0	NA	P62826	P62826	3A		sp|P62826|ENSG00000132341.11|RAN|ENST00000543796.5|121053-HCT-15_RARE_RNA-N156S-and-121053-HCT-15_RARE_EXOME-N156S|156s|	RAN_p.N156S	156	HCT-15	CAM	TRUE	FALSE	TRUE	TRUE
SPMVPLPMPK	R	K	FALSE	FALSE	K	10	9	18	2	16	0	3M(15.9949), 8M(15.9949)	P43155	P43155	3A		sp|P43155-1|ENSG00000095321.16|CRAT|ENST00000318080.6|95526-HCT-15_SNP_RNA-L372M-and-95526-HCT-15_SNP_EXOME-L372M|372m|	CRAT_p.L372M	372	HCT-15	CAM	FALSE	TRUE	TRUE	TRUE
SQAQILLR	R	R	FALSE	FALSE	W	8	1	8	2	2	0	NA	P14550	P14550	3A		sp|P14550|ENSG00000117448.13|AKR1A1|ENST00000372070.7|2889-HCT-15_RARE_RNA-P245Q-and-2889-HCT-15_RARE_EXOME-P245Q|245q|	AKR1A1_p.P245Q	245	HCT-15	CAM	TRUE	FALSE	TRUE	TRUE
SQIFSIASDNQPTVTIK	K	K	FALSE	FALSE	V	17	11	27	2	20	0	NA	P11021	P11021	3A		sp|P11021|ENSG00000044574.7|HSPA5|ENST00000324460.6|95250-HCT-15_RARE_RNA-T453I-and-95250-HCT-15_RARE_EXOME-T453I|453i|	HSPA5_p.T453I	453	HCT-15	CAM	TRUE	FALSE	TRUE	TRUE
SSGSYESASRSSLFAQINQGESITHALK	T	K	FALSE	FALSE	H	28	1	28	3	1	0	NA	Q01518	Q01518	3A		sp|Q01518-1|ENSG00000131236.16|CAP1|ENST00000372797.7|2315-HCT-15_RARE_EXOME-I245S,2315-HCT-15_RARE_EXOME-C247G|245s247g|	CAP1_p.I245S,C247G	245247	HCT-15	CAM	TRUE	FALSE	FALSE	TRUE
STHSLAILGPENPK	K	K	FALSE	FALSE	L	14	1	14	3	2	0	NA	Q5JRX3	Q5JRX3	3A		sp|Q5JRX3-1|ENSG00000107959.15|PITRM1|ENST00000224949.8|99606-HCT-15_SNP_RNA-G1017S-and-99606-HCT-15_SNP_EXOME-G1017S|1017s|	PITRM1_p.G1017S	1017	HCT-15	CAM	FALSE	TRUE	TRUE	TRUE
STIQNLQSFNPFADATKGDDLLPAGTEDYIHIR	M	R	FALSE	FALSE	L	33	2	34	3	2	0	N-term(42.0106)	O60739	O60739	3A		sp|O60739|ENSG00000114784.3|EIF1B|ENST00000232905.3|34138-HCT-15_RARE_EXOME-D11N|11n|	EIF1B_p.D11N	11	HCT-15	CAM	TRUE	FALSE	FALSE	TRUE
STRPSEELELDKWK	E	K	FALSE	FALSE	T	14	13	26	3	1	0	NA	Q7L0Y3	Q7L0Y3	3A		sp|Q7L0Y3|ENSG00000174173.6|TRMT10C|ENST00000309922.6|35912-HCT-15_SNP_RNA-P56R-and-35912-HCT-15_SNP_EXOME-P56R|56r|	TRMT10C_p.P56R	56	HCT-15	CAM	FALSE	TRUE	TRUE	TRUE
STSSSSQSSHSYK	R	K	FALSE	FALSE	A	13	1	13	2	1	0	NA	Q9Y2W1	Q9Y2W1	3A		sp|Q9Y2W1|ENSG00000054118.13|THRAP3|ENST00000354618.9|2173-HCT-15_RARE_RNA-S780T-and-2173-HCT-15_RARE_EXOME-S780T|780t|	THRAP3_p.S780T	780	HCT-15	CAM	TRUE	FALSE	TRUE	TRUE
SVASLFDALHAGFHKVCGGK	K	K	FALSE	FALSE	V	20	17	36	5	1	0	NA	Q5GLZ8	Q5GLZ8	3A	924	sp|Q5GLZ8-1|ENSG00000148634.15|HERC4|ENST00000395198.7|100933-HCT-15_RARE_RNA-F916L|916l|	HERC4_p.F916L	916	HCT-15	CAM	TRUE	FALSE	TRUE	FALSE
SVGGSGVGSFGDNLVTR	R	R	FALSE	FALSE	S	17	6	22	2	1	0	NA	P02545	P02545	3A		sp|P02545-1|ENSG00000160789.19|LMNA|ENST00000368300.8|6152-HCT-15_RARE_RNA-G634V-and-6152-HCT-15_RARE_EXOME-G634V|634v|	LMNA_p.G634V	634	HCT-15	CAM	TRUE	FALSE	TRUE	TRUE
SVPFIHVPSPVVPK	R	K	FALSE	FALSE	L	14	5	18	3	1	0	NA	O75427	O75427	3A		sp|O75427|ENSG00000077454.15|LRCH4|ENST00000310300.10|79642-HCT-15_RARE_EXOME-A591V|591v|	LRCH4_p.A591V	591	HCT-15	CAM	TRUE	FALSE	FALSE	TRUE
SVQSGNLALAASAVAVDAGMAMAGQSPVLR	N	R	FALSE	FALSE	L	30	21	50	2, 3	2	0	NA	P26599	P26599	3A		sp|P26599-1|ENSG00000011304.19|PTBP1|ENST00000349038.8|172261-HCT-15_RARE_RNA-A169V-and-172261-HCT-15_RARE_EXOME-A169V|169v|	PTBP1_p.A169V	169	HCT-15	CAM	TRUE	FALSE	TRUE	TRUE
SVVSDVPEELDFLVPK	K	K	FALSE	FALSE	A	16	15	30	2	4	0	NA	Q14966	Q14966	3A		sp|Q14966-1|ENSG00000075292.18|ZNF638|ENST00000264447.8|20090-HCT-15_SNP_RNA-A1912V-and-20090-HCT-15_SNP_EXOME-A1912V|1912v|	ZNF638_p.A1912V	1912	HCT-15	CAM	FALSE	TRUE	TRUE	TRUE
SWMEGLTLK	K	K	FALSE	FALSE	D	9	11	19	2	1	0	NA	O00487	O00487	3A		sp|O00487|ENSG00000115233.11|PSMD14|ENST00000409682.7|22593-HCT-15_RARE_RNA-Q232K-and-22593-HCT-15_RARE_EXOME-Q232K|232k|	PSMD14_p.Q232K	232	HCT-15	CAM	TRUE	FALSE	TRUE	TRUE
TATLQQAQEVHEK	K	K	FALSE	FALSE	L	13	18	30	2, 3	8	0	NA	P60174	P60174	3A		sp|P60174-3|ENSG00000111669.14|TPI1|ENST00000229270.8|115949-HCT-15_RARE_EXOME-P216L|216l|	TPI1_p.P216L	216	HCT-15	CAM	TRUE	FALSE	FALSE	TRUE
TATREDFLNPDVLDIFISSVQK	R	K	FALSE	FALSE	V	22	22	43	3	1	0	NA	Q9Y251	Q9Y251	3A		sp|Q9Y251-1|ENSG00000173083.14|HPSE|ENST00000311412.9|51027-HCT-15_SNP_RNA-K307R-and-51027-HCT-15_SNP_EXOME-K307R|307r|	HPSE_p.K307R	307	HCT-15	CAM	FALSE	TRUE	TRUE	TRUE
TDVPIYDGSWVEWYMR	K	R	FALSE	FALSE	A	16	1	16	2	7	0	15M(15.9949)	P25325	P25325	3A		sp|P25325-1|ENSG00000128309.16|MPST|ENST00000401419.7|193484-HCT-15_RARE_RNA-P267T-and-193484-HCT-15_RARE_EXOME-P267T|267t|	MPST_p.P267T	267	HCT-15	CAM	TRUE	FALSE	TRUE	TRUE
TEEAILISLAALQPGLTQAGAR	R	R	FALSE	FALSE	H	22	1	22	2	1	0	NA	Q5T280	Q5T280	3A		sp|Q5T280|ENSG00000198917.12|C9orf114|ENST00000361256.9|95497-HCT-15_SNP_RNA-I369T-and-95497-HCT-15_SNP_EXOME-I369T|369t|	C9orf114_p.I369T	369	HCT-15	CAM	FALSE	TRUE	TRUE	TRUE
TGGSAQPETPYSGHGLLIDSLVLLPR	R	R	FALSE	FALSE	V	26	1	26	3	1	0	NA	P55268	P55268	3A		sp|P55268|ENSG00000172037.13|LAMB2|ENST00000418109.5|40862-HCT-15_RARE_RNA-P711H-and-40862-HCT-15_RARE_EXOME-P711H|711h|	LAMB2_p.P711H	711	HCT-15	CAM	TRUE	FALSE	TRUE	TRUE
TGKQEEAFTLAQDVAALEPTDDNSLQALTILYR	R	R	FALSE	FALSE	E	33	1	33	3	1	0	NA	Q14CX7	Q14CX7	3A		sp|Q14CX7-1|ENSG00000111300.9|NAA25|ENST00000261745.8|126112-HCT-15_RARE_RNA-E70D-and-126112-HCT-15_RARE_EXOME-E70D|70d|	NAA25_p.E70D	70	HCT-15	CAM	TRUE	FALSE	TRUE	TRUE
TGSSAQEAASGVALGEAPDHSYESLR	L	R	FALSE	FALSE	V	26	19	44	2, 3	10	0	NA	Q13011	Q13011	3A		sp|Q13011|ENSG00000104823.8|ECH1|ENST00000221418.8|182284-HCT-15_SNP_RNA-E41A-and-182284-HCT-15_SNP_EXOME-E41A|41a|	ECH1_p.E41A	41	HCT-15	CAM	FALSE	TRUE	TRUE	TRUE
THVTHHPVSDHEATLR	K	R	FALSE	FALSE	C	16	1	16	4	1	0	NA	P10321	P10321	3A		sp|P01889|ENSG00000234745.10|HLA-B|ENST00000412585.6|68124-HCT-15_SNP_RNA-I218V-and-68124-HCT-15_SNP_EXOME-I218V|218v|;sp|P10321|ENSG00000204525.16|HLA-C|ENST00000376228.9|68111-HCT-15_SNP_EXOME-L218V|218v|	HLA-B_p.I218V;HLA-C_p.L218V	218	HCT-15	CAM	FALSE	TRUE	TRUE	TRUE
TIEEIYMSSIESLAEVTAR	K	R	FALSE	FALSE	C	19	1	19	2	2	0	NA	Q8IWE2	Q8IWE2	3A		sp|Q8IWE2-1|ENSG00000197712.11|FAM114A1|ENST00000358869.4|46248-HCT-15_SNP_EXOME-V443I|443i|	FAM114A1_p.V443I	443	HCT-15	CAM	FALSE	TRUE	FALSE	TRUE
TLDPFETMLK	K	K	FALSE	FALSE	S	10	1	10	2	4	0	NA	Q6UW02	Q6UW02	3A		sp|Q6UW02-1|ENSG00000119004.15|CYP20A1|ENST00000356079.8|23869-HCT-15_SNP_EXOME-S97L|97l|	CYP20A1_p.S97L	97	HCT-15	CAM	FALSE	TRUE	FALSE	TRUE
TLNEADCATIPPAIR	K	R	FALSE	FALSE	S	15	8	22	3	8	0	7C(56.0374)	P31040	P31040	3A	654	sp|P31040-1|ENSG00000073578.16|SDHA|ENST00000264932.10|53319-HCT-15_SNP_RNA-V657I-and-53319-HCT-15_SNP_EXOME-V657I|657i|	SDHA_p.V657I	657	HCT-15	CAM	FALSE	TRUE	TRUE	TRUE
TLQALEFHTVPFQLLTR	K	R	FALSE	FALSE	Y	17	32	48	3	1	0	NA	Q08380	Q08380	3A		sp|Q08380|ENSG00000108679.12|LGALS3BP|ENST00000262776.7|167811-HCT-15_RARE_RNA-A392T-and-167811-HCT-15_RARE_EXOME-A392T|392t|	LGALS3BP_p.A392T	392	HCT-15	CAM	TRUE	FALSE	TRUE	TRUE
TMQGSEVVSVLK	K	K	FALSE	FALSE	S	12	1	12	2	3	0	2M(15.9949)	Q8WUM4	Q8WUM4	3A		sp|Q8WUM4-1|ENSG00000170248.13|PDCD6IP|ENST00000307296.7|33852-HCT-15_SNP_EXOME-N550S|550s|	PDCD6IP_p.N550S	550	HCT-15	CAM	FALSE	TRUE	FALSE	TRUE
TNFFIQLVRPSVAQPEDTVQFR	R	R	FALSE	FALSE	L	22	3	24	3	1	0	NA	Q16540	Q16540	3A		sp|Q16540|ENSG00000214026.10|MRPL23|ENST00000381519.5|103188-HCT-15_SNP_RNA-G32S-and-103188-HCT-15_SNP_EXOME-G32S|32s|	MRPL23_p.G32S	32	HCT-15	CAM	FALSE	TRUE	TRUE	TRUE
TPVLFDVYEIK	K	K	FALSE	FALSE	E	11	10	20	2	8	0	NA	P50995	P50995	3A		sp|P50995-1|ENSG00000122359.17|ANXA11|ENST00000372231.7|101453-HCT-15_SNP_RNA-I278V-and-101453-HCT-15_SNP_EXOME-I278V|278v|	ANXA11_p.I278V	278	HCT-15	CAM	FALSE	TRUE	TRUE	TRUE
TSELPPLK	K	K	FALSE	FALSE	N	8	18	25	2	2	0	NA	Q14914	Q14914	3A		sp|Q14914-1|ENSG00000106853.18|PTGR1|ENST00000309195.9|94852-HCT-15_SNP_RNA-A27S-and-94852-HCT-15_SNP_EXOME-A27S|27s|	PTGR1_p.A27S	27	HCT-15	CAM	FALSE	TRUE	TRUE	TRUE
TSELPPLKNGEVLLEALFLTVDPYMR	K	R	FALSE	FALSE	V	26	18	43	3	1	0	NA	Q14914	Q14914	3A		sp|Q14914-1|ENSG00000106853.18|PTGR1|ENST00000309195.9|94852-HCT-15_SNP_RNA-A27S-and-94852-HCT-15_SNP_EXOME-A27S|27s|	PTGR1_p.A27S	27	HCT-15	CAM	FALSE	TRUE	TRUE	TRUE
TSSATSPISHLPGSLMELVEK	L	K	FALSE	FALSE	E	21	1	21	3	1	0	NA	Q969Z0	Q969Z0	3A		sp|Q969Z0-1|ENSG00000136270.13|TBRG4|ENST00000258770.7|78038-HCT-15_SNP_RNA-P57L-and-78038-HCT-15_SNP_EXOME-P57L|57l|	TBRG4_p.P57L	57	HCT-15	CAM	FALSE	TRUE	TRUE	TRUE
TTAGVLAAHK	F	K	FALSE	FALSE	L	10	20	29	2	1	0	NA	P32322	P32322	3A		sp|P32322-1|ENSG00000183010.16|PYCR1|ENST00000619204.4|168184-HCT-15_RARE_EXOME-A21T|21t|	PYCR1_p.A21T	21	HCT-15	CAM	TRUE	FALSE	FALSE	TRUE
TTGIVMDSGDGVTHTVPIYEGYALPHAILCLDLAGR	R	R	FALSE	FALSE	D	36	32	67	5	2	0	30C(56.0374)	P60709	P60709	3A	177	sp|P60709|ENSG00000075624.14|ACTB|ENST00000646664.1|76882-HCT-15_RARE_RNA-R177C-and-76882-HCT-15_RARE_EXOME-R177C|177c|	ACTB_p.R177C	177	HCT-15	CAM	TRUE	FALSE	TRUE	TRUE
TVASPGVSVEEAVEQIDIGGVTLLR	K	R	FALSE	FALSE	A	25	14	38	2, 3	18	0	NA	P31939	P31939	3A		sp|P31939-1|ENSG00000138363.14|ATIC|ENST00000236959.13|24162-HCT-15_SNP_RNA-T116S-and-24162-HCT-15_SNP_EXOME-T116S|116s|	ATIC_p.T116S	116	HCT-15	CAM	FALSE	TRUE	TRUE	TRUE
TVTVSDLYAMNFEPR	C	R	TRUE	FALSE	A	15	15	29	2	3	0	NA	P16083	P16083	3A		sp|P16083|ENSG00000124588.19|NQO2|ENST00000338130.6|62795-HCT-15_SNP_RNA-L47F-and-62795-HCT-15_SNP_EXOME-L47F|47f|	NQO2_p.L47F	47	HCT-15	CAM	FALSE	TRUE	TRUE	TRUE
VDKGVVPLAGTNGETTIQGLDGLSER	K	R	FALSE	FALSE	C	26	3	28	3	6	0	NA	P04075	P04075	3A		sp|P04075-1|ENSG00000149925.18|ALDOA|ENST00000569545.5|147948-HCT-15_RARE_EXOME-T125I|125i|	ALDOA_p.T125I	125	HCT-15	CAM	TRUE	FALSE	FALSE	TRUE
VEDPPLDLWLVPH	K	H	FALSE	FALSE	S	13	10	22	2	3	0	NA	Q6ZNB6	Q6ZNB6	3A		sp|Q6ZNB6-1|ENSG00000170448.11|NFXL1|ENST00000329043.7|50230-HCT-15_SNP_RNA-P246L-and-50230-HCT-15_SNP_EXOME-P246L|246l|	NFXL1_p.P246L	246	HCT-15	CAM	FALSE	TRUE	TRUE	TRUE
VEFATLQEALAHALMEK	R	K	FALSE	FALSE	E	17	1	17	2, 3	11	0	15M(15.9949)	Q14980	Q14980	3A		sp|Q14980-1|ENSG00000137497.17|NUMA1|ENST00000393695.7|113171-HCT-15_SNP_RNA-T1057M-and-113171-HCT-15_SNP_EXOME-T1057M|1057m|	NUMA1_p.T1057M	1057	HCT-15	CAM	FALSE	TRUE	TRUE	TRUE
VGEAGLLSVNCSEAGPGALGLEAVSDSGTK	K	K	FALSE	FALSE	A	30	1	30	3	1	0	11C(56.0374)	O75369	O75369	3A	1158	sp|O75369-1|ENSG00000136068.14|FLNB|ENST00000295956.8|35308-HCT-15_SNP_RNA-D1157N-and-35308-HCT-15_SNP_EXOME-D1157N|1157n|	FLNB_p.D1157N	1157	HCT-15	CAM	FALSE	TRUE	TRUE	TRUE
VIDGMTVVHSIELQATDGHDRPLTSC	K	C	FALSE	TRUE	S	26	3	28	5	1	0	26C(56.0374)	P45877	P45877	3A	191	sp|P45877|ENSG00000168938.5|PPIC|ENST00000306442.4|60516-HCT-15_SNP_RNA-N190S-and-60516-HCT-15_SNP_EXOME-N190S|190s|	PPIC_p.N190S	190	HCT-15	CAM	FALSE	TRUE	TRUE	TRUE
VKEQLEAAKPEPIIEEVDLANLAPR	-	R	FALSE	FALSE	K	25	1	25	4	1	0	NA	Q8WUD4	Q8WUD4	3A		sp|Q8WUD4|ENSG00000160799.11|CCDC12|ENST00000425441.5|40450-HCT-15_SNP_RNA-V98I-and-40450-HCT-15_SNP_EXOME-V98I|98i|	CCDC12_p.V98I	98	HCT-15	CAM	FALSE	TRUE	TRUE	TRUE
VLQQLTEEAALDEASGFNIPAEQASRPWTQPR	R	R	FALSE	FALSE	G	32	19	50	3	1	0	NA	Q96K21	Q96K21	3A		sp|Q96K21-1|ENSG00000166140.17|ZFYVE19|ENST00000355341.8|138875-HCT-15_SNP_RNA-S376A-and-138875-HCT-15_SNP_EXOME-S376A|376a|	ZFYVE19_p.S376A	376	HCT-15	CAM	FALSE	TRUE	TRUE	TRUE
VLTGTGNVNVIQPNYPAAAR	K	R	FALSE	FALSE	D	20	5	24	2	1	0	NA	Q9BT17	Q9BT17	3A		sp|Q9BT17-1|ENSG00000148824.18|MTG1|ENST00000317502.10|99504-HCT-15_SNP_RNA-I293V-and-99504-HCT-15_SNP_EXOME-I293V|293v|	MTG1_p.I293V	293	HCT-15	CAM	FALSE	TRUE	TRUE	TRUE
VMQVVDEKLPGLLGNFPGPFEEEMK	K	K	FALSE	FALSE	G	25	14	38	3	4	0	2M(15.9949)	Q13510	Q13510	3A		sp|Q13510-1|ENSG00000104763.18|ASAH1|ENST00000637790.1|85579-HCT-15_SNP_RNA-I93V-and-85579-HCT-15_SNP_EXOME-I93V|93v|	ASAH1_p.I93V	93	HCT-15	CAM	FALSE	TRUE	TRUE	TRUE
VNLEEQLKETVEK	K	K	FALSE	FALSE	Y	13	9	21	2, 3	7	0	NA	Q9HAV7	Q9HAV7	3A		sp|Q9HAV7|ENSG00000109519.12|GRPEL1|ENST00000264954.4|49557-HCT-15_RARE_RNA-K66N-and-49557-HCT-15_RARE_EXOME-K66N|66n|	GRPEL1_p.K66N	66	HCT-15	CAM	TRUE	FALSE	TRUE	TRUE
VPTTTTMGFTVTPSSSPGTAR	K	R	FALSE	FALSE	T	21	1	21	2	1	0	NA	Q9HC84	Q9HC84	3A		sp|Q9HC84|ENSG00000117983.17|MUC5B|ENST00000529681.5|103098-HCT-15_SNP_EXOME-T3871M|3871m|	MUC5B_p.T3871M	3871	HCT-15	CAM	FALSE	TRUE	FALSE	TRUE
VQVLAAQLLSEMK	R	K	FALSE	FALSE	L	13	11	23	2	1	0	NA	Q6P9B6	Q6P9B6	3A		sp|Q6P9B6|ENSG00000140950.15|TLDC1|ENST00000343629.10|155273-HCT-15_SNP_RNA-D172E-and-155273-HCT-15_SNP_EXOME-D172E|172e|	TLDC1_p.D172E	172	HCT-15	CAM	FALSE	TRUE	TRUE	TRUE
VSIAELAQASNSLITWGR	R	R	FALSE	FALSE	E	18	5	22	2	2	0	NA	Q96HY6	Q96HY6	3A		sp|Q96HY6-1|ENSG00000198171.12|DDRGK1|ENST00000354488.7|187610-HCT-15_SNP_RNA-A303T-and-187610-HCT-15_SNP_EXOME-A303T|303t|	DDRGK1_p.A303T	303	HCT-15	CAM	FALSE	TRUE	TRUE	TRUE
VVDNTTAKEFAGSLGIPFLETSAK	K	K	FALSE	FALSE	N	24	4	27	3	2	0	NA	Q9H0U4	Q9H0U4	3A		sp|Q9H0U4|ENSG00000174903.15|RAB1B|ENST00000311481.10|106330-HCT-15_RARE_RNA-D141G-and-106330-HCT-15_RARE_EXOME-D141G|141g|	RAB1B_p.D141G	141	HCT-15	CAM	TRUE	FALSE	TRUE	TRUE
VVIQPEALFSIYSK	R	K	FALSE	FALSE	A	14	5	18	2	1	0	NA	P29590	P29590	3A		sp|P29590-1|ENSG00000140464.19|PML|ENST00000268058.7|140382-HCT-15_SNP_RNA-F645L-and-140382-HCT-15_SNP_EXOME-F645L|645l|	PML_p.F645L	645	HCT-15	CAM	FALSE	TRUE	TRUE	TRUE
VWHLVQPTDEVDEGK	R	K	FALSE	FALSE	S	15	1	15	3	2	0	NA	O15031	O15031	3A		sp|O15031|ENSG00000196576.14|PLXNB2|ENST00000359337.8|196445-HCT-15_SNP_RNA-R1593Q-and-196445-HCT-15_SNP_EXOME-R1593Q|1593q|	PLXNB2_p.R1593Q	1593	HCT-15	CAM	FALSE	TRUE	TRUE	TRUE
VYGDIIYTPAK	R	K	FALSE	FALSE	D	11	25	35	2	2	0	NA	P51649	P51649	3A		sp|P51649-1|ENSG00000112294.12|ALDH5A1|ENST00000357578.7|63286-HCT-15_SNP_RNA-H180Y-and-63286-HCT-15_SNP_EXOME-H180Y|180y|	ALDH5A1_p.H180Y	180	HCT-15	CAM	FALSE	TRUE	TRUE	TRUE
WDYHTTHINQLQLLSTIDESPIFK	R	K	FALSE	FALSE	E	24	15	38	4	1	0	NA	O94923	O94923	3A		sp|O94923|ENSG00000138604.9|GLCE|ENST00000261858.6|140177-HCT-15_SNP_RNA-V597I-and-140177-HCT-15_SNP_EXOME-V597I|597i|	GLCE_p.V597I	597	HCT-15	CAM	FALSE	TRUE	TRUE	TRUE
WGQIILK	R	K	FALSE	FALSE	N	7	5	11	2	2	0	NA	Q9H4A4	Q9H4A4	3A		sp|Q9H4A4|ENSG00000176393.10|RNPEP|ENST00000295640.8|7673-HCT-15_SNP_RNA-V579I-and-7673-HCT-15_SNP_EXOME-V579I|579i|	RNPEP_p.V579I	579	HCT-15	CAM	FALSE	TRUE	TRUE	TRUE
WLSTSIPEAQWHSSLSR	R	R	FALSE	FALSE	T	17	6	22	3	2	0	NA	P49327	P49327	3A		sp|P49327|ENSG00000169710.8|FASN|ENST00000306749.3|168265-HCT-15_SNP_RNA-A727S-and-168265-HCT-15_SNP_EXOME-A727S|727s|	FASN_p.A727S	727	HCT-15	CAM	FALSE	TRUE	TRUE	TRUE
YASICQQNGIVPIVEPEILPDGGHDLK	R	K	FALSE	FALSE	R	27	1	27	3, 4	5	0	5C(56.0374)	P04075	P04075	3A	178	sp|P04075-1|ENSG00000149925.18|ALDOA|ENST00000569545.5|147948-HCT-15_RARE_RNA-D196G-and-147948-HCT-15_RARE_EXOME-D196G|196g|	ALDOA_p.D196G	196	HCT-15	CAM	TRUE	FALSE	TRUE	TRUE
YELTEISNVDVETQSGK	R	K	FALSE	FALSE	T	17	6	22	2	6	0	NA	Q09666	Q09666	3A		sp|Q09666-1|ENSG00000124942.13|AHNAK|ENST00000378024.8|112027-HCT-15_RARE_RNA-H187Y-and-112027-HCT-15_RARE_EXOME-H187Y|187y|	AHNAK_p.H187Y	187	HCT-15	CAM	TRUE	FALSE	TRUE	TRUE
YEVPLETPR	R	R	FALSE	FALSE	V	9	1	9	2	1	0	NA	P10253	P10253	3A		sp|P10253|ENSG00000171298.12|GAA|ENST00000390015.7|161319-HCT-15_SNP_RNA-H199R-and-161319-HCT-15_SNP_EXOME-H199R|199r|	GAA_p.H199R	199	HCT-15	CAM	FALSE	TRUE	TRUE	TRUE
YFVEAGDMAVR	K	R	FALSE	FALSE	R	11	24	34	2	1	0	NA	P17987	P17987	3A		sp|P17987|ENSG00000120438.11|TCP1|ENST00000321394.11|71383-HCT-15_RARE_RNA-A305D-and-71383-HCT-15_RARE_EXOME-A305D|305d|	TCP1_p.A305D	305	HCT-15	CAM	TRUE	FALSE	TRUE	TRUE
YGMTEIGMALSGPLTTAMR	R	R	FALSE	FALSE	L	19	13	31	2	8	0	18M(15.9949), 3M(15.9949), 8M(15.9949)	Q4G176	Q4G176	3A		sp|Q4G176|ENSG00000176715.15|ACSF3|ENST00000317447.8|150719-HCT-15_SNP_RNA-V372M-and-150719-HCT-15_SNP_EXOME-V372M|372m|	ACSF3_p.V372M	372	HCT-15	CAM	FALSE	TRUE	TRUE	TRUE
YPEAHPSVR	K	R	FALSE	FALSE	F	9	9	17	2	1	0	NA	Q15819	Q15819	3A		sp|Q15819|ENSG00000169139.11|UBE2V2|ENST00000523111.6|82984-HCT-15_RARE_RNA-P77H-and-82984-HCT-15_RARE_EXOME-P77H|77h|	UBE2V2_p.P77H	77	HCT-15	CAM	TRUE	FALSE	TRUE	TRUE
YQIPALAQAGYQVLAMDMK	R	K	FALSE	FALSE	G	19	29	47	2	2	0	NA	P34913	P34913	3A		sp|P34913-1|ENSG00000120915.13|EPHX2|ENST00000521400.5|82290-HCT-15_SNP_RNA-R287Q-and-82290-HCT-15_SNP_EXOME-R287Q|287q|	EPHX2_p.R287Q	287	HCT-15	CAM	FALSE	TRUE	TRUE	TRUE
YTLPPGVDPAQVSSSLSPEGTLTVEAPMPK	K	K	FALSE	FALSE	L	30	8	37	2	7	0	NA	P04792	P04792	3A		sp|P04792|ENSG00000106211.8|HSPB1|ENST00000248553.6|73783-HCT-15_RARE_RNA-T151A-and-73783-HCT-15_RARE_EXOME-T151A|151a|	HSPB1_p.T151A	151	HCT-15	CAM	TRUE	FALSE	TRUE	TRUE
AAAAAAAAAPAAAATAATTAATTAATAAQ	K	Q	FALSE	FALSE	-	29	6	34	2	3	0	NA	P37108	P37108	3B		sp|P37108|ENSG00000140319.10|SRP14|ENST00000267884.10|142380-HCT-15_SNP_RNA-P124A-and-142380-HCT-15_SNP_EXOME-P124A|124a|	SRP14_p.P124A	124	HCT-15	IA	FALSE	TRUE	TRUE	TRUE
AAAVRPDLAQLMNSSGSHK	M	K	FALSE	FALSE	D	19	2	20	3	1	0	N-term(42.0106)	Q9BT78	Q9BT78	3B		sp|Q9BT78-1|ENSG00000138663.8|COPS4|ENST00000264389.6|47267-HCT-15_RARE_RNA-Q7P-and-47267-HCT-15_RARE_EXOME-Q7P|7p|	COPS4_p.Q7P	7	HCT-15	IA	TRUE	FALSE	TRUE	TRUE
AAGAAEAAVAAVEEVGSAGHFEELLR	M	R	FALSE	FALSE	L	26	1	26	2, 3	14	0	N-term(42.0106)	O76003	O76003	3B		sp|O76003|ENSG00000108010.11|GLRX3|ENST00000331244.9|99420-HCT-15_SNP_RNA-Q21H-and-99420-HCT-15_SNP_EXOME-Q21H|21h|	GLRX3_p.Q21H	21	HCT-15	IA	FALSE	TRUE	TRUE	TRUE
AALAGHPQAHFLDADPGFVHSDGTISHHDMYDYLHLSR	R	R	FALSE	FALSE	L	38	10	47	6	1	0	NA	Q15102	Q15102	3B		sp|Q15102|ENSG00000079462.7|PAFAH1B3|ENST00000262890.7|182746-HCT-15_RARE_RNA-R168Q-and-182746-HCT-15_RARE_EXOME-R168Q|168q|	PAFAH1B3_p.R168Q	168	HCT-15	IA	TRUE	FALSE	TRUE	TRUE
AALVDLEPCTMDSVR	R	R	FALSE	FALSE	S	15	7	21	2	4	0	9C(57.0215)	Q9BUF5	Q9BUF5	3B	71	sp|Q9BUF5|ENSG00000176014.12|TUBB6|ENST00000317702.9|168837-HCT-15_RARE_RNA-G71C-and-168837-HCT-15_RARE_EXOME-G71C|71c|	TUBB6_p.G71C	71	HCT-15	IA	TRUE	FALSE	TRUE	TRUE
AAVPAPEEEMDECEQALAAEPK	K	K	FALSE	FALSE	A	22	8	29	2	14	0	10M(15.9949), 13C(57.0215)	P26641	P26641	3B	266	sp|P26641-1|ENSG00000254772.9|EEF1G|ENST00000329251.4|112031-HCT-15_RARE_RNA-A256V-and-112031-HCT-15_RARE_EXOME-A256V|256v|	EEF1G_p.A256V	256	HCT-15	IA	TRUE	FALSE	TRUE	TRUE
ACDMVGQVAITR	K	R	FALSE	FALSE	L	12	6	17	2	1	0	2C(57.0215)	Q02218	Q02218	3B	919	sp|Q02218-1|ENSG00000105953.14|OGDH|ENST00000222673.5|72959-HCT-15_SNP_RNA-R919C-and-72959-HCT-15_SNP_EXOME-R919C|919c|	OGDH_p.R919C	919	HCT-15	IA	FALSE	TRUE	TRUE	TRUE
[truncated: 371 more rows]

## Sheet: cyscap_variants_table_CAMonly
Peptide.Sequence	Prev.AA	Cleavage Site	Prev=C	Cleav=C	Next.AA	Peptide.Length	Protein.Start	Protein.End	Charges	Spectral.Count	Intensity	Assigned.Modifications	Protein	Entry.Name	Replicate	CysPositionInProtein	Variant_Information	Variant	Gene_VariantPosition	Cell_Line	Reagent	RARE	COMMON	RNA	EXOME
[truncated: 204 more rows]
